# Supplementary material
Source: publisher site journal article supplement (https://www.dovepress.com/article/468718)
Supplement: Supplementary file 1 [file get_supplementary_file.php]

**Supplementary materials**

**Supplementary file 1** STROBE checklist

|  | Item No. | | Recommendation | Page  No. | Relevant text from manuscript |
| --- | --- | --- | --- | --- | --- |
| **Title and abstract** | 1 | | (*a*) Indicate the study’s design with a commonly used term in the title or the abstract | 1-2 | logistic regression |
| (*b*) Provide in the abstract an informative and balanced summary of what was done and what was found | 1-2 | diagnosing MetS |
| Introduction | | | | |  |
| Background/rationale | 2 | | Explain the scientific background and rationale for the investigation being reported | 3-4 | MetS often develops silently, and effective tools for identifying and diagnosing the risk of MetS are currently lacking |
| Objectives | 3 | | State specific objectives, including any prespecified hypotheses | 4 | design and validate a clinical prediction model aimed at diagnosing MetS |
| Methods | | | | |  |
| Study design | 4 | | Present key elements of study design early in the paper | 5 | This study followed the principles outlined in the Helsinki Declaration and obtained approval from the Ethics Committee of the First Hospital of Jiaxing (Approval number 2022-KY-021). All patients have signed informed consent forms. |
| Setting | 5 | | Describe the setting, locations, and relevant dates, including periods of recruitment, exposure, follow-up, and data collection | 5 | The subjects of this study consisted of individuals who participated in the annual health examination organized by the Health Management Center of the First Hospital of Jiaxing for staff of government institutions and enterprises, as well as self-paying individuals undergoing health check-ups, from January 19 to December 31, 2022 |
| Participants | 6 | | (*a*) *Cohort study*—Give the eligibility criteria, and the sources and methods of selection of participants. Describe methods of follow-up  *Case-control study*—Give the eligibility criteria, and the sources and methods of case ascertainment and control selection. Give the rationale for the choice of cases and controls  *Cross-sectional study*—Give the eligibility criteria, and the sources and methods of selection of participants | 5-6 | The diagnostic criteria for MetS, as defined by the National Cholesterol Education Program Adult Treatment Panel III (NCEP-ATP III) |
| (*b*)*Cohort study*—For matched studies, give matching criteria and number of exposed and unexposed  *Case-control study*—For matched studies, give matching criteria and the number of controls per case |  |  |
| Variables | 7 | | Clearly define all outcomes, exposures, predictors, potential confounders, and effect modifiers. Give diagnostic criteria, if applicable | 6 | gender, age, education level (junior high school or below, high school or college, undergraduate or above), occupation (civil servant, public institution employee, corporate employee, other), marital status (married, unmarried), smoking status, alcohol consumption, exercise habits, meal frequency (regular, irregular), food types consumed (do not eat or occasionally eat, regularly eat: potatoes, white meat, red meat, eggs, dairy products, soy products, vegetables, fruits, snacks, desserts, fast food, nuts), dietary preferences (sweet, spicy, salty, light diet), BMI, blood pressure (BP) (elevated or not elevated), and laboratory indicators [total cholesterol (TC), TG, high-density lipoprotein cholesterol (HDL-C), LDL-C, fasting blood-glucose (FBG)]. |
| Data sources/ measurement | 8* | | For each variable of interest, give sources of data and details of methods of assessment (measurement). Describe comparability of assessment methods if there is more than one group | 6 | Measurement of relevant indicators |
| Bias | 9 | | Describe any efforts to address potential sources of bias | 6 | Participants rested for 30 minutes，BP was recorded on at least two occasions with a 1-2 minute interval，Blood Collection and Measurement Method: Participants fasted for 8 hours or more |
| Study size | 10 | | Explain how the study size was arrived at | 5 | Strictly following the inclusion criteria, the final participants were determined |
| Quantitative variables | 11 | | Explain how quantitative variables were handled in the analyses. If applicable, describe which groupings were chosen and why | 7 | Continuous variables that adhere to a normal distribution are presented using the mean and standard deviation (SD), while those with a non-normal distribution are represented by the median and interquartile range (IQR) |
| Statistical methods | 12 | | (*a*) Describe all statistical methods, including those used to control for confounding | 7 | t-test or non-parametric tests，Comparison of categorical variables is performed using either the Pearson chi-square test or Fisher's exact test. |
| (*b*) Describe any methods used to examine subgroups and interactions |  | No subgroup analysis was conducted |
| (*c*) Explain how missing data were addressed |  | There are no missing values |
| (*d*) *Cohort study*—If applicable, explain how loss to follow-up was addressed  *Case-control study*—If applicable, explain how matching of cases and controls was addressed  *Cross-sectional study*—If applicable, describe analytical methods taking account of sampling strategy |  |  |
| (*e*) Describe any sensitivity analyses | 7 | the Receiver Operating Characteristic (ROC) curve [Area Under the Curve (AUC)], Harrell’s concordance index (C-index), and calibration curve, Decision Curve Analysis (DCA) |
| Results | | | | | |
| Participants | 13* | | (a) Report numbers of individuals at each stage of study—eg numbers potentially eligible, examined for eligibility, confirmed eligible, included in the study, completing follow-up, and analysed | 8 | In this study, a total of 26,637 participants with comprehensive data were incorporated |
| (b) Give reasons for non-participation at each stage | 5 | Exclusion criteria |
| (c) Consider use of a flow diagram | 5 | Figure 1 |
| Descriptive data | 14* | | (a) Give characteristics of study participants (eg demographic, clinical, social) and information on exposures and potential confounders | 8 | The median age was 42.0 [33.0; 53.0], with 14450 (54.2%) males. The majority had an undergraduate education or higher (61.6%). |
| (b) Indicate number of participants with missing data for each variable of interest |  | There are no missing values |
| (c) *Cohort study*—Summarise follow-up time (eg, average and total amount) |  | No follow-up was conducted |
| Outcome data | 15* | | *Cohort study*—Report numbers of outcome events or summary measures over time |  |  |
| *Case-control study—*Report numbers in each exposure category, or summary measures of exposure |  |  |
| *Cross-sectional study—*Report numbers of outcome events or summary measures | 8 | 2413 (9.06%) individuals were diagnosed with MetS, with 1700 cases (9.12%) in the training group and 713 cases (8.92%) in the validation set |
| Main results | 16 | | (*a*) Give unadjusted estimates and, if applicable, confounder-adjusted estimates and their precision (eg, 95% confidence interval). Make clear which confounders were adjusted for and why they were included |  | unadjusted |
| (*b*) Report category boundaries when continuous variables were categorized | 7 | Elevated blood pressure was specifiedas systolic pressure greater than or equal to 130 mmHg and/or diastolic pressure greater than or equal to 85 mmHg. |
| (*c*) If relevant, consider translating estimates of relative risk into absolute risk for a meaningful time period |  |  |
| Other analyses | | 17 | Report other analyses done—eg analyses of subgroups and interactions, and sensitivity analyses |  |  |
| Discussion | | | | | |
| Key results | | 18 | Summarise key results with reference to study objectives | 9 | The six selected predictor variables identified above were included in a multiple Logistic regression analysis to establish the predictive model (Table 2). To facilitate visualization and clinical application, we developed a nomogram (Fig. 3). |
| Limitations | | 19 | Discuss limitations of the study, taking into account sources of potential bias or imprecision. Discuss both direction and magnitude of any potential bias | 13 | this study has certain limitations |
| Interpretation | | 20 | Give a cautious overall interpretation of results considering objectives, limitations, multiplicity of analyses, results from similar studies, and other relevant evidence |  |  |
| Generalisability | | 21 | Discuss the generalisability (external validity) of the study results |  |  |
| Other information | | |  | | |
| Funding | | 22 | Give the source of funding and the role of the funders for the present study and, if applicable, for the original study on which the present article is based | 14 | Key Construction Disciplines of Provincial and Municipal Co construction of Zhejiang [NO.2023-SSGJ-002] |

*Give information separately for cases and controls in case-control studies and, if applicable, for exposed and unexposed groups in cohort and cross-sectional studies.

**Note:** An Explanation and Elaboration article discusses each checklist item and gives methodological background and published examples of transparent reporting. The STROBE checklist is best used in conjunction with this article (freely available on the Web sites of PLoS Medicine at http://www.plosmedicine.org/, Annals of Internal Medicine at http://www.annals.org/, and Epidemiology at http://www.epidem.com/). Information on the STROBE Initiative is available at www.strobe-statement.org.

**Supplementary table 1** Nomo score assessment for individual patients

| **patient categories** | **Score** | **Probability** |
| --- | --- | --- |
| Train | 49.89064001 | 0.000235559 |
| Train | 79.73580179 | 0.689617218 |
| Train | 50.82466139 | 0.000313654 |
| Train | 78.84181956 | 0.628129795 |
| Train | 54.04537786 | 0.000841641 |
| Train | 59.12221926 | 0.003979682 |
| Train | 71.88299319 | 0.166639319 |
| Train | 57.90337134 | 0.002742032 |
| Train | 52.84061923 | 0.000581836 |
| Train | 46.07711131 | 7.31676E-05 |
| Train | 48.58230296 | 0.000157725 |
| Train | 51.84156094 | 0.000428373 |
| Train | 58.34489636 | 0.003138327 |
| Train | 61.70832636 | 0.008752989 |
| Train | 66.07388004 | 0.032580236 |
| Train | 67.7726173 | 0.053655116 |
| Train | 51.8925953 | 0.000435126 |
| Train | 52.58252814 | 0.000537588 |
| Train | 57.72543611 | 0.002596809 |
| Train | 58.3526481 | 0.003145772 |
| Train | 55.03624183 | 0.001140122 |
| Train | 51.59056813 | 0.000396653 |
| Train | 52.2436316 | 0.000484553 |
| Train | 44.6697648 | 4.75239E-05 |
| Train | 68.44380956 | 0.065118097 |
| Train | 52.2295774 | 0.000482471 |
| Train | 62.93263616 | 0.01269026 |
| Train | 55.13108432 | 0.001173726 |
| Train | 58.59175048 | 0.003384269 |
| Train | 67.2880941 | 0.046592482 |
| Train | 45.70308393 | 6.52398E-05 |
| Train | 83.2503682 | 0.867154216 |
| Train | 48.63710949 | 0.000160398 |
| Train | 66.21148044 | 0.033936672 |
| Train | 69.90466635 | 0.09829945 |
| Train | 53.31926728 | 0.000673756 |
| Train | 49.11306297 | 0.000185597 |
| Train | 48.65865002 | 0.000161461 |
| Train | 78.47512305 | 0.601509572 |
| Train | 47.26568606 | 0.000105339 |
| Train | 77.24995773 | 0.50901846 |
| Train | 54.09022801 | 0.000853285 |
| Train | 55.15196454 | 0.001181257 |
| Train | 61.03050894 | 0.007122046 |
| Train | 57.18370732 | 0.002200239 |
| Train | 38.66237346 | 7.53216E-06 |
| Train | 59.09441398 | 0.003946027 |
| Train | 68.97895442 | 0.075849612 |
| Train | 57.45688004 | 0.002392021 |
| Train | 58.16615624 | 0.002971447 |
| Train | 52.793561 | 0.000573505 |
| Train | 43.13279162 | 2.96647E-05 |
| Train | 42.64467936 | 2.55411E-05 |
| Train | 61.51374917 | 0.008250201 |
| Train | 49.57242018 | 0.000213664 |
| Train | 55.04504093 | 0.001143199 |
| Train | 88.97748732 | 0.974223477 |
| Train | 73.78835422 | 0.263980802 |
| Train | 52.33452753 | 0.000498242 |
| Train | 50.87466466 | 0.000318498 |
| Train | 46.8543726 | 9.28579E-05 |
| Train | 82.07302184 | 0.819802362 |
| Train | 55.65612259 | 0.001378471 |
| Train | 63.6219727 | 0.015630567 |
| Train | 48.45133766 | 0.000151518 |
| Train | 76.19832649 | 0.428887346 |
| Train | 56.64527132 | 0.001865999 |
| Train | 66.83213051 | 0.040760853 |
| Train | 47.44059708 | 0.000111142 |
| Train | 60.32393936 | 0.005742661 |
| Train | 76.47725435 | 0.449952495 |
| Train | 88.32521548 | 0.968694833 |
| Train | 49.35820243 | 0.000200083 |
| Train | 47.70117653 | 0.000120386 |
| Train | 52.68143121 | 0.000554132 |
| Train | 46.30402173 | 7.84394E-05 |
| Train | 44.83799791 | 5.00397E-05 |
| Train | 52.28539906 | 0.000490796 |
| Train | 60.40455807 | 0.005885548 |
| Train | 65.93075928 | 0.031225018 |
| Train | 76.07765318 | 0.419848569 |
| Train | 45.12911029 | 5.47118E-05 |
| Train | 58.64730157 | 0.003442211 |
| Train | 48.88134314 | 0.000172869 |
| Train | 56.48210743 | 0.001775098 |
| Train | 49.68837756 | 0.000221396 |
| Train | 52.89303627 | 0.000591258 |
| Train | 60.23990249 | 0.005597386 |
| Train | 55.06411207 | 0.001149896 |
| Train | 73.72419055 | 0.260175843 |
| Train | 43.76787534 | 3.60423E-05 |
| Train | 36.08756155 | 3.42004E-06 |
| Train | 66.32159767 | 0.03506129 |
| Train | 46.47664499 | 8.2703E-05 |
| Train | 49.23587686 | 0.000192718 |
| Train | 67.18424132 | 0.045198125 |
| Train | 44.75872122 | 4.88381E-05 |
| Train | 72.47527852 | 0.193407666 |
| Train | 45.82144936 | 6.76511E-05 |
| Train | 77.74245144 | 0.546637605 |
| Train | 50.72723236 | 0.000304424 |
| Train | 62.59474575 | 0.011455551 |
| Train | 56.20666053 | 0.001631561 |
| Train | 46.45829996 | 8.22391E-05 |
| Train | 45.77584781 | 6.67117E-05 |
| Train | 88.79941957 | 0.972816223 |
| Train | 70.879106 | 0.128144588 |
| Train | 50.17096424 | 0.000256697 |
| Train | 58.31303571 | 0.003107911 |
| Train | 45.93598985 | 7.00692E-05 |
| Train | 59.08967263 | 0.003940317 |
| Train | 52.47417248 | 0.000520029 |
| Train | 50.4290154 | 0.000277829 |
| Train | 53.40036626 | 0.00069071 |
| Train | 44.12438221 | 4.02056E-05 |
| Train | 83.20109948 | 0.865404208 |
| Train | 60.40690827 | 0.005889764 |
| Train | 42.970041 | 2.82206E-05 |
| Train | 36.76486188 | 4.20947E-06 |
| Train | 48.50977042 | 0.000154256 |
| Train | 58.50054798 | 0.003291241 |
| Train | 55.95278851 | 0.001509552 |
| Train | 46.87550646 | 9.34616E-05 |
| Train | 56.7059746 | 0.001900992 |
| Train | 48.56864686 | 0.000157066 |
| Train | 47.30267092 | 0.00010654 |
| Train | 51.76706279 | 0.000418702 |
| Train | 54.92634037 | 0.001102382 |
| Train | 70.67907881 | 0.12144678 |
| Train | 50.0939424 | 0.000250707 |
| Train | 38.50163388 | 7.16992E-06 |
| Train | 63.87615266 | 0.016876185 |
| Train | 44.25785729 | 4.18852E-05 |
| Train | 49.32433484 | 0.000198016 |
| Train | 50.54094825 | 0.000287527 |
| Train | 60.59936984 | 0.00624558 |
| Train | 63.84822164 | 0.016734668 |
| Train | 50.69534079 | 0.000301463 |
| Train | 71.62114015 | 0.155785149 |
| Train | 63.77514885 | 0.016369939 |
| Train | 85.44705006 | 0.927547497 |
| Train | 44.73522106 | 4.84874E-05 |
| Train | 58.25503045 | 0.003053288 |
| Train | 51.32004877 | 0.000365089 |
| Train | 53.85694644 | 0.000794426 |
| Train | 40.59789002 | 1.36355E-05 |
| Train | 55.12622482 | 0.001171981 |
| Train | 81.6875134 | 0.801675283 |
| Train | 56.41248761 | 0.00173767 |
| Train | 78.64415027 | 0.61386513 |
| Train | 55.07445025 | 0.001153543 |
| Train | 50.09608775 | 0.000250872 |
| Train | 50.77514304 | 0.000308928 |
| Train | 53.71222663 | 0.000759969 |
| Train | 53.99243624 | 0.000828099 |
| Train | 57.09076799 | 0.002138553 |
| Train | 73.52287892 | 0.248470794 |
| Train | 75.55445922 | 0.381349158 |
| Train | 47.91707507 | 0.000128625 |
| Train | 45.77066062 | 6.66057E-05 |
| Train | 59.13963937 | 0.004000912 |
| Train | 70.56225852 | 0.117676314 |
| Train | 65.22397426 | 0.02529473 |
| Train | 46.17815994 | 7.54701E-05 |
| Train | 46.1784905 | 7.54777E-05 |
| Train | 54.67436914 | 0.001020498 |
| Train | 52.25401554 | 0.000486098 |
| Train | 63.75467576 | 0.016269158 |
| Train | 70.71483967 | 0.122621664 |
| Train | 78.4394371 | 0.598883819 |
| Train | 65.20391668 | 0.025143528 |
| Train | 69.40170226 | 0.085450714 |
| Train | 60.34100768 | 0.005772621 |
| Train | 70.30121768 | 0.109616266 |
| Train | 55.88618181 | 0.001479078 |
| Train | 50.81667664 | 0.000312887 |
| Train | 42.72455967 | 2.61744E-05 |
| Train | 64.36850984 | 0.019572629 |
| Train | 53.57614032 | 0.000728932 |
| Train | 46.73050211 | 8.93973E-05 |
| Train | 58.69469996 | 0.003492429 |
| Train | 73.99073876 | 0.276213716 |
| Train | 69.55426449 | 0.089178214 |
| Train | 67.94688971 | 0.05643417 |
| Train | 93.26077527 | 0.992935567 |
| Train | 54.66097129 | 0.001016319 |
| Train | 60.90890333 | 0.006863153 |
| Train | 59.04916053 | 0.003891861 |
| Train | 55.76449068 | 0.00142498 |
| Train | 52.02030297 | 0.000452496 |
| Train | 45.68230073 | 6.48254E-05 |
| Train | 61.41498755 | 0.008006067 |
| Train | 59.41836785 | 0.004356347 |
| Train | 62.20127422 | 0.010166766 |
| Train | 73.98002058 | 0.275557086 |
| Train | 49.47000364 | 0.00020706 |
| Train | 40.70375432 | 1.40854E-05 |
| Train | 55.20444872 | 0.001200398 |
| Train | 69.71732335 | 0.093323781 |
| Train | 52.72178082 | 0.000561027 |
| Train | 49.7145556 | 0.00022318 |
| Train | 74.86471458 | 0.33284898 |
| Train | 45.44845529 | 6.03401E-05 |
| Train | 63.89297704 | 0.016961994 |
| Train | 44.54316771 | 4.57145E-05 |
| Train | 60.3899985 | 0.005859484 |
| Train | 41.90541815 | 2.03607E-05 |
| Train | 47.37184905 | 0.000108824 |
| Train | 56.12988831 | 0.001593661 |
| Train | 52.40230977 | 0.000508701 |
| Train | 57.9789361 | 0.002806129 |
| Train | 47.39453453 | 0.000109584 |
| Train | 54.93180004 | 0.001104227 |
| Train | 79.1270717 | 0.648321792 |
| Train | 59.4680289 | 0.004422897 |
| Train | 45.68331154 | 6.48455E-05 |
| Train | 56.57665393 | 0.001827219 |
| Train | 78.25640293 | 0.585329576 |
| Train | 54.28334876 | 0.000905294 |
| Train | 45.93898257 | 7.01335E-05 |
| Train | 46.45295703 | 8.21045E-05 |
| Train | 74.55425445 | 0.312055676 |
| Train | 67.4266023 | 0.04851592 |
| Train | 67.74568813 | 0.053237415 |
| Train | 81.46002637 | 0.79035089 |
| Train | 61.55890252 | 0.008364264 |
| Train | 52.14712411 | 0.000470431 |
| Train | 52.66455908 | 0.000551275 |
| Train | 46.09061937 | 7.34713E-05 |
| Train | 65.17835017 | 0.024952086 |
| Train | 51.01072551 | 0.000332063 |
| Train | 63.43628333 | 0.014778222 |
| Train | 58.15791535 | 0.00296397 |
| Train | 46.03306323 | 7.21861E-05 |
| Train | 60.67999869 | 0.006400916 |
| Train | 55.58192895 | 0.001347506 |
| Train | 54.98038204 | 0.001120781 |
| Train | 47.67990513 | 0.000119604 |
| Train | 57.41273449 | 0.002359937 |
| Train | 52.65834125 | 0.000550225 |
| Train | 53.27499532 | 0.000664678 |
| Train | 57.14709267 | 0.002175729 |
| Train | 66.55090235 | 0.037519491 |
| Train | 55.43516994 | 0.001288286 |
| Train | 63.7664631 | 0.016327106 |
| Train | 50.00920695 | 0.000244279 |
| Train | 66.19087068 | 0.033730083 |
| Train | 62.390482 | 0.010767531 |
| Train | 55.0151883 | 0.001132794 |
| Train | 71.19046334 | 0.139195163 |
| Train | 64.32618362 | 0.019325111 |
| Train | 49.0122767 | 0.00017995 |
| Train | 47.49193513 | 0.000112906 |
| Train | 71.49209518 | 0.150651667 |
| Train | 57.58026069 | 0.002484025 |
| Train | 52.64274227 | 0.000547601 |
| Train | 37.62083771 | 5.47291E-06 |
| Train | 51.0509335 | 0.000336181 |
| Train | 49.49818079 | 0.000208856 |
| Train | 55.90972243 | 0.001489778 |
| Train | 67.49477013 | 0.049489978 |
| Train | 62.29797796 | 0.010469551 |
| Train | 53.72593195 | 0.000763167 |
| Train | 55.94543035 | 0.001506155 |
| Train | 51.3034422 | 0.000363236 |
| Train | 47.06179618 | 9.89553E-05 |
| Train | 46.10827226 | 7.387E-05 |
| Train | 49.78805327 | 0.000228266 |
| Train | 50.63875435 | 0.000296279 |
| Train | 51.96002106 | 0.000444212 |
| Train | 75.5445586 | 0.3806331 |
| Train | 60.538793 | 0.006131344 |
| Train | 59.06308782 | 0.003908452 |
| Train | 49.6086761 | 0.000216052 |
| Train | 61.78244276 | 0.008952395 |
| Train | 60.47581078 | 0.006014772 |
| Train | 39.86488997 | 1.08908E-05 |
| Train | 48.7930277 | 0.000168251 |
| Train | 75.51402774 | 0.378428428 |
| Train | 47.15330319 | 0.000101771 |
| Train | 71.9590214 | 0.169902009 |
| Train | 61.22086982 | 0.007546916 |
| Train | 82.77301007 | 0.849367891 |
| Train | 54.56502166 | 0.000986882 |
| Train | 49.62936038 | 0.000217427 |
| Train | 65.36521196 | 0.026384733 |
| Train | 80.22259042 | 0.720631815 |
| Train | 70.70728383 | 0.122372617 |
| Train | 85.54602909 | 0.929560892 |
| Train | 60.69930218 | 0.006438674 |
| Train | 50.5473486 | 0.000288092 |
| Train | 53.06517105 | 0.000623285 |
| Train | 38.37220493 | 6.89093E-06 |
| Train | 50.29462682 | 0.000266616 |
| Train | 69.96283797 | 0.099891913 |
| Train | 42.53684074 | 2.47103E-05 |
| Train | 45.63459711 | 6.38841E-05 |
| Train | 47.33940844 | 0.000107747 |
| Train | 80.05685974 | 0.710287013 |
| Train | 75.9602348 | 0.411104834 |
| Train | 54.23794703 | 0.000892789 |
| Train | 73.29066982 | 0.235414053 |
| Train | 65.92811943 | 0.031200553 |
| Train | 42.72546457 | 2.61817E-05 |
| Train | 65.24841897 | 0.025480183 |
| Train | 66.08728282 | 0.032710031 |
| Train | 78.06645737 | 0.571125967 |
| Train | 70.30145407 | 0.109623392 |
| Train | 46.17262817 | 7.53422E-05 |
| Train | 49.07133418 | 0.000183238 |
| Train | 57.62245418 | 0.00251629 |
| Train | 43.32155781 | 3.14324E-05 |
| Train | 50.08365338 | 0.000249918 |
| Train | 88.59442952 | 0.971103618 |
| Train | 58.47930668 | 0.003269945 |
| Train | 45.84588461 | 6.81598E-05 |
| Train | 40.69769761 | 1.40593E-05 |
| Train | 58.65394438 | 0.003449205 |
| Train | 56.15509229 | 0.001606005 |
| Train | 60.9887903 | 0.007032155 |
| Train | 54.31167055 | 0.000913183 |
| Train | 43.5620274 | 3.38376E-05 |
| Train | 51.48617621 | 0.000384162 |
| Train | 55.82906246 | 0.001453435 |
| Train | 39.99374902 | 1.13297E-05 |
| Train | 75.31179667 | 0.363955807 |
| Train | 46.03528513 | 7.22353E-05 |
| Train | 61.77764875 | 0.008939359 |
| Train | 56.24585444 | 0.001651255 |
| Train | 100.1080193 | 0.999129189 |
| Train | 61.75685892 | 0.008883058 |
| Train | 44.84584265 | 5.01603E-05 |
| Train | 48.96217894 | 0.000177207 |
| Train | 66.08231078 | 0.032661825 |
| Train | 66.71702323 | 0.039402927 |
| Train | 51.57622624 | 0.000394913 |
| Train | 48.32940068 | 0.000145958 |
| Train | 48.42269004 | 0.000150193 |
| Train | 62.14429379 | 0.009992435 |
| Train | 79.07407557 | 0.644607817 |
| Train | 39.92572627 | 1.10958E-05 |
| Train | 53.5657325 | 0.000726611 |
| Train | 50.67106937 | 0.000299228 |
| Train | 49.19791757 | 0.000190488 |
| Train | 46.35972784 | 7.97907E-05 |
| Train | 46.07856145 | 7.32002E-05 |
| Train | 77.25648107 | 0.509518142 |
| Train | 55.50799519 | 0.00131734 |
| Train | 64.50770274 | 0.020408689 |
| Train | 87.67565203 | 0.962056878 |
| Train | 60.41553848 | 0.005905279 |
| Train | 56.40375701 | 0.001733032 |
| Train | 36.91878425 | 4.41292E-06 |
| Train | 63.67495952 | 0.015882537 |
| Train | 46.5765462 | 8.52754E-05 |
| Train | 64.45540128 | 0.020090517 |
| Train | 45.5882813 | 6.29833E-05 |
| Train | 47.8503556 | 0.00012602 |
| Train | 69.95564435 | 0.099693718 |
| Train | 61.47590258 | 0.008155786 |
| Train | 47.04521175 | 9.84534E-05 |
| Train | 57.18869914 | 0.002203603 |
| Train | 51.01279593 | 0.000332274 |
| Train | 54.51667641 | 0.000972374 |
| Train | 45.10297283 | 5.4275E-05 |
| Train | 56.24759025 | 0.001652133 |
| Train | 52.70813327 | 0.000558686 |
| Train | 92.44697581 | 0.990951363 |
| Train | 58.29577671 | 0.003091557 |
| Train | 77.53645073 | 0.530942156 |
| Train | 59.14495162 | 0.004007408 |
| Train | 69.00553173 | 0.076422854 |
| Train | 51.89192901 | 0.000435037 |
| Train | 41.97045362 | 2.07708E-05 |
| Train | 52.93225495 | 0.000598407 |
| Train | 69.59386287 | 0.090169423 |
| Train | 39.29172922 | 9.13547E-06 |
| Train | 57.83940993 | 0.00268892 |
| Train | 66.93777665 | 0.042046472 |
| Train | 72.57228414 | 0.198090377 |
| Train | 70.38616908 | 0.11218467 |
| Train | 50.2087751 | 0.00025969 |
| Train | 49.03986959 | 0.000181479 |
| Train | 51.15520694 | 0.0003471 |
| Train | 59.71838029 | 0.004774117 |
| Train | 54.72287392 | 0.001035774 |
| Train | 58.63098297 | 0.003425088 |
| Train | 46.97547968 | 9.63708E-05 |
| Train | 88.719731 | 0.972162508 |
| Train | 76.60708322 | 0.459823744 |
| Train | 99.40432588 | 0.998919701 |
| Train | 56.2060316 | 0.001631247 |
| Train | 51.48195284 | 0.000383665 |
| Train | 75.7481653 | 0.395457578 |
| Train | 56.54738733 | 0.001810924 |
| Train | 50.22627736 | 0.000261087 |
| Train | 41.49143493 | 1.79335E-05 |
| Train | 69.65304519 | 0.091669409 |
| Train | 48.97584542 | 0.000177951 |
| Train | 35.75787525 | 3.0912E-06 |
| Train | 47.5718416 | 0.000115706 |
| Train | 44.34741831 | 4.30514E-05 |
| Train | 67.35715667 | 0.047542292 |
| Train | 55.0698601 | 0.001151922 |
| Train | 45.92857558 | 6.99101E-05 |
| Train | 48.80373918 | 0.000168805 |
| Train | 74.35257073 | 0.298935905 |
| Train | 57.50792642 | 0.002429667 |
| Train | 44.13471014 | 4.03331E-05 |
| Train | 65.88286863 | 0.030783845 |
| Train | 50.12590076 | 0.000253176 |
| Train | 47.89801085 | 0.000127875 |
| Train | 45.63754005 | 6.39418E-05 |
| Train | 64.26970665 | 0.018999631 |
| Train | 54.40745736 | 0.000940377 |
| Train | 64.83248587 | 0.02249776 |
| Train | 48.1691899 | 0.000138961 |
| Train | 91.99962879 | 0.989634761 |
| Train | 45.90538734 | 6.94148E-05 |
| Train | 52.59806011 | 0.000540153 |
| Train | 60.4431595 | 0.005955207 |
| Train | 64.45319088 | 0.020077171 |
| Train | 64.07333418 | 0.017909214 |
| Train | 72.42225888 | 0.190884107 |
| Train | 40.38145729 | 1.276E-05 |
| Train | 72.8739726 | 0.213196725 |
| Train | 53.5858734 | 0.000731109 |
| Train | 72.44362931 | 0.191898201 |
| Train | 47.96759509 | 0.000130633 |
| Train | 49.46855703 | 0.000206968 |
| Train | 77.68154938 | 0.542005694 |
| Train | 77.68782756 | 0.542483481 |
| Train | 44.96189854 | 5.19774E-05 |
| Train | 49.46902335 | 0.000206997 |
| Train | 64.59410138 | 0.020945118 |
| Train | 54.84443947 | 0.001075071 |
| Train | 52.59860431 | 0.000540243 |
| Train | 81.07369615 | 0.770047343 |
| Train | 47.83008865 | 0.00012524 |
| Train | 57.13771542 | 0.002169495 |
| Train | 48.4592546 | 0.000151886 |
| Train | 71.97587595 | 0.170632134 |
| Train | 51.45793517 | 0.000380851 |
| Train | 66.25358631 | 0.034362522 |
| Train | 58.18142598 | 0.00298535 |
| Train | 59.80919949 | 0.004908277 |
| Train | 70.9062032 | 0.129075753 |
| Train | 55.24349836 | 0.001214841 |
| Train | 60.2007732 | 0.005530998 |
| Train | 81.32132579 | 0.783216651 |
| Train | 87.68496904 | 0.962161023 |
| Train | 84.96081374 | 0.916866528 |
| Train | 58.61910193 | 0.003412675 |
| Train | 40.8426836 | 1.46984E-05 |
| Train | 54.12252184 | 0.00086177 |
| Train | 63.805248 | 0.016519209 |
| Train | 74.16835777 | 0.287233868 |
| Train | 46.8271219 | 9.20853E-05 |
| Train | 47.34987028 | 0.000108093 |
| Train | 81.12470565 | 0.77280539 |
| Train | 59.19696747 | 0.004071576 |
| Train | 62.59496245 | 0.011456302 |
| Train | 50.78407214 | 0.000309775 |
| Train | 78.7338048 | 0.620360882 |
| Train | 67.0613043 | 0.043598922 |
| Train | 67.86193431 | 0.055062918 |
| Train | 56.96412811 | 0.002057267 |
| Train | 40.81467736 | 1.45727E-05 |
| Train | 61.11751264 | 0.007313198 |
| Train | 55.12954913 | 0.001173175 |
| Train | 45.02555014 | 5.30018E-05 |
| Train | 82.22171917 | 0.826440265 |
| Train | 42.3503842 | 2.33372E-05 |
| Train | 62.92028836 | 0.012642904 |
| Train | 57.28255472 | 0.002267797 |
| Train | 79.13280005 | 0.648722221 |
| Train | 63.55989885 | 0.015340387 |
| Train | 88.35601746 | 0.968979974 |
| Train | 65.2977072 | 0.025858176 |
| Train | 57.21805881 | 0.002223487 |
| Train | 61.18774749 | 0.007471218 |
| Train | 74.59548957 | 0.31477657 |
| Train | 54.14360521 | 0.000867354 |
| Train | 47.59124346 | 0.000116396 |
| Train | 54.38697613 | 0.000934495 |
| Train | 74.65340164 | 0.318619304 |
| Train | 50.70537176 | 0.000302391 |
| Train | 53.75147295 | 0.000769163 |
| Train | 52.91231397 | 0.000594762 |
| Train | 50.9728258 | 0.000328228 |
| Train | 64.04304448 | 0.017746578 |
| Train | 47.63682495 | 0.000118034 |
| Train | 65.00831819 | 0.02371451 |
| Train | 44.98621688 | 5.23664E-05 |
| Train | 38.90439117 | 8.1124E-06 |
| Train | 56.10940559 | 0.001583698 |
| Train | 62.22325124 | 0.010234809 |
| Train | 48.49672429 | 0.000153641 |
| Train | 64.54511493 | 0.020639297 |
| Train | 39.62675263 | 1.01239E-05 |
| Train | 44.12595362 | 4.0225E-05 |
| Train | 67.179567 | 0.045136311 |
| Train | 56.10483407 | 0.001581484 |
| Train | 54.78123037 | 0.001054456 |
| Train | 49.44896546 | 0.000205728 |
| Train | 59.06854692 | 0.003914975 |
| Train | 48.85522803 | 0.000171491 |
| Train | 52.92953604 | 0.000597909 |
| Train | 46.70249028 | 8.86328E-05 |
| Train | 55.23969237 | 0.001213425 |
| Train | 43.3226275 | 3.14427E-05 |
| Train | 57.07051124 | 0.002125339 |
| Train | 45.31801198 | 5.79743E-05 |
| Train | 44.94032555 | 5.16347E-05 |
| Train | 45.8971511 | 6.92397E-05 |
| Train | 49.92848125 | 0.000238308 |
| Train | 49.51302855 | 0.000209809 |
| Train | 48.26183396 | 0.000142965 |
| Train | 53.04132893 | 0.000618747 |
| Train | 48.28941041 | 0.000144179 |
| Train | 89.36496881 | 0.97704491 |
| Train | 44.43117409 | 4.41713E-05 |
| Train | 74.37464413 | 0.300356349 |
| Train | 68.35528218 | 0.063484917 |
| Train | 49.76556709 | 0.000226698 |
| Train | 56.2090082 | 0.001632734 |
| Train | 50.70785806 | 0.000302622 |
| Train | 69.01394614 | 0.076605201 |
| Train | 54.7583779 | 0.0010471 |
| Train | 53.17424167 | 0.000644469 |
| Train | 70.53980449 | 0.116963248 |
| Train | 48.40625279 | 0.000149438 |
| Train | 77.17426266 | 0.503216545 |
| Train | 62.39231958 | 0.010773534 |
| Train | 49.33635557 | 0.000198747 |
| Train | 54.89189073 | 0.00109081 |
| Train | 48.69708128 | 0.000163374 |
| Train | 60.80947344 | 0.006658431 |
| Train | 61.55892481 | 0.008364321 |
| Train | 63.99217987 | 0.017476735 |
| Train | 53.68275864 | 0.000753138 |
| Train | 53.29910432 | 0.000669606 |
| Train | 89.15246386 | 0.975537117 |
| Train | 48.37231912 | 0.000147891 |
| Train | 81.45557112 | 0.790124339 |
| Train | 76.94552092 | 0.485685321 |
| Train | 53.21316133 | 0.000652202 |
| Train | 56.85263906 | 0.001988262 |
| Train | 68.41971041 | 0.064669712 |
| Train | 56.0374661 | 0.001549199 |
| Train | 60.04519699 | 0.005274692 |
| Train | 52.87225663 | 0.000587505 |
| Train | 67.5354102 | 0.050079488 |
| Train | 42.38558458 | 2.35905E-05 |
| Train | 53.62798904 | 0.000740605 |
| Train | 64.84071267 | 0.022553326 |
| Train | 64.29522907 | 0.01914605 |
| Train | 60.38866432 | 0.0058571 |
| Train | 61.78980072 | 0.008972429 |
| Train | 62.12139434 | 0.009923206 |
| Train | 45.20913148 | 5.60708E-05 |
| Train | 57.43231778 | 0.002374117 |
| Train | 61.26853552 | 0.007657177 |
| Train | 53.86818559 | 0.000797167 |
| Train | 65.45215842 | 0.027078353 |
| Train | 60.54901528 | 0.006150475 |
| Train | 68.0305097 | 0.05781516 |
| Train | 46.5339253 | 8.41683E-05 |
| Train | 52.66980931 | 0.000552162 |
| Train | 50.61135685 | 0.000293801 |
| Train | 81.81874674 | 0.80799573 |
| Train | 61.09008021 | 0.007252385 |
| Train | 49.51347704 | 0.000209838 |
| Train | 47.57452224 | 0.000115801 |
| Train | 55.33471151 | 0.001249256 |
| Train | 48.10774892 | 0.000136368 |
| Train | 52.51257266 | 0.000526185 |
| Train | 62.48898143 | 0.011094049 |
| Train | 56.04231596 | 0.001551501 |
| Train | 68.25665857 | 0.061710466 |
| Train | 74.89734163 | 0.335074298 |
| Train | 62.28127609 | 0.010416628 |
| Train | 52.19610332 | 0.000477546 |
| Train | 56.38582457 | 0.001723546 |
| Train | 75.48286193 | 0.376183213 |
| Train | 50.52363672 | 0.000286006 |
| Train | 48.47874665 | 0.000152796 |
| Train | 40.42491253 | 1.29311E-05 |
| Train | 81.56926175 | 0.795847069 |
| Train | 40.8938622 | 1.49309E-05 |
| Train | 60.43068145 | 0.005932599 |
| Train | 75.05826719 | 0.346156506 |
| Train | 49.77564862 | 0.0002274 |
| Train | 73.18429482 | 0.229593729 |
| Train | 50.71434998 | 0.000303225 |
| Train | 53.99789968 | 0.000829486 |
| Train | 81.17125119 | 0.775301505 |
| Train | 48.44800618 | 0.000151363 |
| Train | 58.70483969 | 0.003503267 |
| Train | 56.25586083 | 0.001656321 |
| Train | 57.96365512 | 0.002793048 |
| Train | 62.30826215 | 0.010502272 |
| Train | 55.06668763 | 0.001150803 |
| Train | 55.020521 | 0.001134645 |
| Train | 43.98679247 | 3.85447E-05 |
| Train | 73.42705974 | 0.243024906 |
| Train | 38.71361489 | 7.65145E-06 |
| Train | 51.81798342 | 0.000425288 |
| Train | 71.88876742 | 0.166885313 |
| Train | 49.75944555 | 0.000226273 |
| Train | 47.27755108 | 0.000105723 |
| Train | 62.01348312 | 0.009603327 |
| Train | 54.49451717 | 0.000965795 |
| Train | 67.35107107 | 0.047457863 |
| Train | 52.39843297 | 0.000508097 |
| Train | 71.81521327 | 0.163772986 |
| Train | 60.88992746 | 0.006823606 |
| Train | 62.25621039 | 0.010337695 |
| Train | 46.7290417 | 8.93573E-05 |
| Train | 59.65001513 | 0.004675542 |
| Train | 54.10387 | 0.000856859 |
| Train | 57.88092387 | 0.002723274 |
| Train | 53.91506632 | 0.0008087 |
| Train | 64.83729835 | 0.022530241 |
| Train | 90.70695419 | 0.984670011 |
| Train | 39.89405798 | 1.09886E-05 |
| Train | 57.44253913 | 0.002381552 |
| Train | 70.12773469 | 0.104531125 |
| Train | 62.23289427 | 0.010264803 |
| Train | 71.80896425 | 0.163510774 |
| Train | 71.65713517 | 0.157242331 |
| Train | 72.14729227 | 0.178199939 |
| Train | 48.16757055 | 0.000138893 |
| Train | 44.61905117 | 4.67907E-05 |
| Train | 45.07087856 | 5.37436E-05 |
| Train | 45.60176614 | 6.32443E-05 |
| Train | 71.74147733 | 0.160699979 |
| Train | 50.05777825 | 0.000247943 |
| Train | 61.66419941 | 0.008636366 |
| Train | 55.59783838 | 0.001354087 |
| Train | 54.85217933 | 0.001077622 |
| Train | 89.20902068 | 0.975947586 |
| Train | 47.84337352 | 0.000125751 |
| Train | 63.3740626 | 0.014502988 |
| Train | 51.44527098 | 0.000379375 |
| Train | 53.47207015 | 0.000706054 |
| Train | 48.84832311 | 0.000171128 |
| Train | 42.64817088 | 2.55684E-05 |
| Train | 48.69775787 | 0.000163408 |
| Train | 78.30319986 | 0.588808215 |
| Train | 49.85643997 | 0.000233102 |
| Train | 35.95421297 | 3.28302E-06 |
| Train | 52.62517754 | 0.000544661 |
| Train | 71.92913832 | 0.168613565 |
| Train | 66.14095529 | 0.033234798 |
| Train | 70.6841568 | 0.121613029 |
| Train | 66.96781144 | 0.042419017 |
| Train | 58.78195114 | 0.003586789 |
| Train | 49.3731984 | 0.000201005 |
| Train | 74.17087303 | 0.287391795 |
| Train | 58.03003316 | 0.002850316 |
| Train | 58.61929248 | 0.003412874 |
| Train | 56.07284973 | 0.001566073 |
| Train | 52.86648736 | 0.000586467 |
| Train | 56.5456291 | 0.001809949 |
| Train | 44.07612906 | 3.96151E-05 |
| Train | 60.29702991 | 0.00569574 |
| Train | 47.47521316 | 0.000112328 |
| Train | 56.23786928 | 0.001647224 |
| Train | 85.59303347 | 0.930498791 |
| Train | 41.66782574 | 1.89301E-05 |
| Train | 47.78941 | 0.000123687 |
| Train | 48.3301498 | 0.000145991 |
| Train | 76.65736433 | 0.463655685 |
| Train | 62.13753397 | 0.009971946 |
| Train | 87.98613219 | 0.965383326 |
| Train | 62.1064809 | 0.009878374 |
| Train | 55.79690774 | 0.001439195 |
| Train | 65.73107036 | 0.029424992 |
| Train | 51.52485974 | 0.000388744 |
| Train | 69.79395383 | 0.095331121 |
| Train | 56.74588769 | 0.001924355 |
| Train | 71.96129695 | 0.170000443 |
| Train | 98.17675332 | 0.998426717 |
| Train | 44.86027675 | 5.03827E-05 |
| Train | 65.17922378 | 0.024958606 |
| Train | 66.39498059 | 0.035830594 |
| Train | 54.4327502 | 0.000947692 |
| Train | 53.55615646 | 0.000724482 |
| Train | 61.67562143 | 0.008666404 |
| Train | 45.74156134 | 6.60141E-05 |
| Train | 59.60550176 | 0.004612448 |
| Train | 51.60039059 | 0.000397849 |
| Train | 45.41832804 | 5.97852E-05 |
| Train | 49.81760232 | 0.000230343 |
| Train | 51.76433523 | 0.000418352 |
| Train | 57.60034781 | 0.002499334 |
| Train | 78.55682514 | 0.607499071 |
| Train | 53.49371944 | 0.000710753 |
| Train | 46.07926042 | 7.32159E-05 |
| Train | 83.80626482 | 0.88559212 |
| Train | 43.46186135 | 3.28142E-05 |
| Train | 98.5948721 | 0.998615771 |
| Train | 61.94460563 | 0.009404514 |
| Train | 78.74743516 | 0.621344667 |
| Train | 56.75718718 | 0.001931021 |
| Train | 49.90027367 | 0.000236256 |
| Train | 54.77106259 | 0.001051177 |
| Train | 40.15110346 | 1.18898E-05 |
| Train | 56.52789411 | 0.001800151 |
| Train | 68.53635284 | 0.066867149 |
| Train | 54.47785998 | 0.000960879 |
| Train | 46.52295931 | 8.38858E-05 |
| Train | 63.71905362 | 0.016095262 |
| Train | 79.49978951 | 0.673918065 |
| Train | 56.73239728 | 0.001916427 |
| Train | 89.27362104 | 0.976408226 |
| Train | 72.40259865 | 0.189954746 |
| Train | 48.60844143 | 0.000158994 |
| Train | 52.16887398 | 0.000473577 |
| Train | 45.05927406 | 5.35527E-05 |
| Train | 50.22482371 | 0.000260971 |
| Train | 53.17875437 | 0.000645361 |
| Train | 85.40457877 | 0.926667427 |
| Train | 56.81702715 | 0.001966711 |
| Train | 36.57695155 | 3.97378E-06 |
| Train | 60.03010254 | 0.005250463 |
| Train | 47.45955718 | 0.00011179 |
| Train | 50.64438228 | 0.00029679 |
| Train | 52.26931014 | 0.000488382 |
| Train | 83.06361873 | 0.860417659 |
| Train | 78.39664712 | 0.595727699 |
| Train | 74.44721373 | 0.305053199 |
| Train | 82.55533515 | 0.840627563 |
| Train | 57.54654335 | 0.002458538 |
| Train | 56.25830645 | 0.001657562 |
| Train | 44.54219039 | 4.57008E-05 |
| Train | 65.26020456 | 0.025570072 |
| Train | 57.56614547 | 0.002473323 |
| Train | 55.31078035 | 0.001240133 |
| Train | 57.19663042 | 0.002208957 |
| Train | 59.05913772 | 0.003903739 |
| Train | 67.20323813 | 0.045450173 |
| Train | 45.96714363 | 7.07417E-05 |
| Train | 67.32355998 | 0.047077979 |
| Train | 78.20960774 | 0.58184256 |
| Train | 44.25312757 | 4.18245E-05 |
| Train | 36.19041599 | 3.52963E-06 |
| Train | 46.664887 | 8.76168E-05 |
| Train | 56.29839285 | 0.001678028 |
| Train | 51.60736632 | 0.000398701 |
| Train | 68.2903216 | 0.062310863 |
| Train | 52.71751564 | 0.000560294 |
| Train | 66.23320516 | 0.034155751 |
| Train | 47.11797145 | 0.000100674 |
| Train | 75.56289445 | 0.381959531 |
| Train | 74.67862495 | 0.320300789 |
| Train | 64.56632136 | 0.020771146 |
| Train | 41.50295912 | 1.79969E-05 |
| Train | 47.54264651 | 0.000114675 |
| Train | 50.9845066 | 0.000329405 |
| Train | 91.82623247 | 0.989074916 |
| Train | 64.77113422 | 0.02208774 |
| Train | 73.58001283 | 0.251756853 |
| Train | 52.32129595 | 0.000496226 |
| Train | 50.96359675 | 0.0003273 |
| Train | 67.77914636 | 0.053756858 |
| Train | 54.32767831 | 0.000917673 |
| Train | 58.89895065 | 0.003717319 |
| Train | 47.89128868 | 0.000127612 |
| Train | 54.53942164 | 0.000979172 |
| Train | 131.0428922 | 0.999999934 |
| Train | 82.48789819 | 0.837837591 |
| Train | 81.58961511 | 0.796859225 |
| Train | 85.91512671 | 0.93662078 |
| Train | 50.26250548 | 0.000264003 |
| Train | 54.93399614 | 0.00110497 |
| Train | 63.44192412 | 0.014803427 |
| Train | 70.96277308 | 0.131038362 |
| Train | 50.85555381 | 0.000316638 |
| Train | 87.60520953 | 0.961260465 |
| Train | 55.24766229 | 0.001216391 |
| Train | 49.97719216 | 0.000241893 |
| Train | 54.8003779 | 0.001060658 |
| Train | 57.12692004 | 0.002162341 |
| Train | 46.20626925 | 7.61233E-05 |
| Train | 58.72011451 | 0.003519656 |
| Train | 51.55356301 | 0.000392179 |
| Train | 76.03630789 | 0.416763662 |
| Train | 57.63612049 | 0.002526831 |
| Train | 59.6985078 | 0.004745252 |
| Train | 52.46877507 | 0.000519169 |
| Train | 42.44506636 | 2.40247E-05 |
| Train | 47.09079255 | 9.9839E-05 |
| Train | 59.52477151 | 0.004500177 |
| Train | 49.90854465 | 0.000236855 |
| Train | 49.33788292 | 0.00019884 |
| Train | 70.62689758 | 0.119749884 |
| Train | 46.54892934 | 8.45564E-05 |
| Train | 56.64034329 | 0.001863188 |
| Train | 44.18322746 | 4.09376E-05 |
| Train | 45.78534135 | 6.69062E-05 |
| Train | 73.46717933 | 0.245295313 |
| Train | 49.08919699 | 0.000184244 |
| Train | 72.64208612 | 0.201512349 |
| Train | 49.30722279 | 0.00019698 |
| Train | 77.20886424 | 0.505868855 |
| Train | 54.8451269 | 0.001075297 |
| Train | 63.99987108 | 0.017517278 |
| Train | 53.4302882 | 0.000697072 |
| Train | 74.18157891 | 0.288064551 |
| Train | 63.82324407 | 0.016609101 |
| Train | 65.94335209 | 0.031342037 |
| Train | 52.68229431 | 0.000554279 |
| Train | 48.24306845 | 0.000142145 |
| Train | 61.65846898 | 0.008621334 |
| Train | 98.35670401 | 0.998511051 |
| Train | 58.93288509 | 0.003756056 |
| Train | 54.67120799 | 0.001019511 |
| Train | 55.62900595 | 0.001367072 |
| Train | 48.31387278 | 0.000145264 |
| Train | 59.31160995 | 0.004216639 |
| Train | 50.38922855 | 0.000274461 |
| Train | 60.40810144 | 0.005891907 |
| Train | 47.01195794 | 9.74547E-05 |
| Train | 74.29646519 | 0.29534296 |
| Train | 43.53535052 | 3.3562E-05 |
| Train | 77.1571511 | 0.501904785 |
| Train | 67.26600742 | 0.046292554 |
| Train | 44.57515709 | 4.61651E-05 |
| Train | 62.6704494 | 0.011721432 |
| Train | 51.69003421 | 0.000408932 |
| Train | 82.6244349 | 0.843445783 |
| Train | 56.84856569 | 0.001985785 |
| Train | 57.66406307 | 0.002548519 |
| Train | 64.61439773 | 0.021073127 |
| Train | 54.97875172 | 0.001120221 |
| Train | 60.54394518 | 0.006140978 |
| Train | 58.20739648 | 0.003009148 |
| Train | 56.55633969 | 0.001815893 |
| Train | 54.75758055 | 0.001046845 |
| Train | 46.53598183 | 8.42214E-05 |
| Train | 44.32253082 | 4.27241E-05 |
| Train | 43.57171762 | 3.39383E-05 |
| Train | 70.58398417 | 0.118369762 |
| Train | 59.14948568 | 0.004012961 |
| Train | 51.5742587 | 0.000394675 |
| Train | 51.9808673 | 0.00044706 |
| Train | 57.99565112 | 0.002820508 |
| Train | 79.72332313 | 0.688797607 |
| Train | 59.6380344 | 0.004658477 |
| Train | 69.25421123 | 0.081981946 |
| Train | 54.76976852 | 0.00105076 |
| Train | 46.3415635 | 7.93476E-05 |
| Train | 52.15169163 | 0.00047109 |
| Train | 58.87213003 | 0.003686985 |
| Train | 44.71736267 | 4.82226E-05 |
| Train | 49.05396998 | 0.000182265 |
| Train | 46.03598304 | 7.22507E-05 |
| Train | 54.46827752 | 0.000958063 |
| Train | 58.46101923 | 0.003251719 |
| Train | 76.45338143 | 0.4481414 |
| Train | 81.52666664 | 0.793716728 |
| Train | 56.72868014 | 0.001914248 |
| Train | 63.14239229 | 0.013521907 |
| Train | 43.16382286 | 2.99483E-05 |
| Train | 46.68976902 | 8.82878E-05 |
| Train | 47.59402704 | 0.000116496 |
| Train | 46.96449323 | 9.60467E-05 |
| Train | 55.10565844 | 0.001164621 |
| Train | 62.90405365 | 0.012580911 |
| Train | 65.94343136 | 0.031342783 |
| Train | 50.88607866 | 0.000319615 |
| Train | 46.53053275 | 8.40808E-05 |
| Train | 52.22704074 | 0.000482096 |
| Train | 98.93006575 | 0.998750809 |
| Train | 52.4276968 | 0.000512674 |
| Train | 50.22170804 | 0.000260722 |
| Train | 45.89974122 | 6.92947E-05 |
| Train | 53.00086942 | 0.000611123 |
| Train | 55.48141583 | 0.001306662 |
| Train | 41.26447704 | 1.67279E-05 |
| Train | 36.49388408 | 3.87384E-06 |
| Train | 42.45305402 | 2.40836E-05 |
| Train | 78.49581667 | 0.603029459 |
| Train | 67.41702293 | 0.048380489 |
| Train | 42.70766963 | 2.60392E-05 |
| Train | 71.39302492 | 0.146805668 |
| Train | 53.11616833 | 0.000633102 |
| Train | 68.18202819 | 0.06039862 |
| Train | 63.41155633 | 0.014668233 |
| Train | 48.322361 | 0.000145643 |
| Train | 51.50105515 | 0.000385918 |
| Train | 50.36565391 | 0.000272484 |
| Train | 44.71749634 | 4.82246E-05 |
| Train | 48.36122443 | 0.000147389 |
| Train | 60.76613535 | 0.006571112 |
| Train | 47.36575505 | 0.000108621 |
| Train | 67.69368543 | 0.052439347 |
| Train | 55.76664491 | 0.001425921 |
| Train | 53.68080932 | 0.000752689 |
| Train | 53.47903952 | 0.000707563 |
| Train | 49.8581191 | 0.000233222 |
| Train | 56.71484362 | 0.001906159 |
| Train | 48.54239355 | 0.000155807 |
| Train | 76.0188949 | 0.41546636 |
| Train | 49.57888628 | 0.000214088 |
| Train | 51.90860185 | 0.000437266 |
| Train | 53.14676865 | 0.000639067 |
| Train | 50.46045678 | 0.00028052 |
| Train | 59.21171951 | 0.00408996 |
| Train | 54.64343096 | 0.001010873 |
| Train | 107.5670295 | 0.999911501 |
| Train | 58.84490424 | 0.003656444 |
| Train | 76.73422664 | 0.469521545 |
| Train | 48.94237658 | 0.000176134 |
| Train | 53.8695869 | 0.000797509 |
| Train | 52.05215371 | 0.000456935 |
| Train | 57.23547101 | 0.002235364 |
| Train | 37.57900933 | 5.40316E-06 |
| Train | 52.08347064 | 0.000461342 |
| Train | 46.22625957 | 7.65913E-05 |
| Train | 56.26890075 | 0.001662946 |
| Train | 57.55427557 | 0.00246436 |
| Train | 38.76007238 | 7.76123E-06 |
| Train | 40.50825157 | 1.32658E-05 |
| Train | 41.8936084 | 2.02871E-05 |
| Train | 67.47119563 | 0.049151036 |
| Train | 51.69422941 | 0.000409458 |
| Train | 58.01589504 | 0.002838021 |
| Train | 51.02079366 | 0.00033309 |
| Train | 60.29772978 | 0.005696954 |
| Train | 73.51835907 | 0.248212196 |
| Train | 60.54737745 | 0.006147405 |
| Train | 59.05613907 | 0.003900166 |
| Train | 43.97010884 | 3.8348E-05 |
| Train | 81.7104279 | 0.802790088 |
| Train | 71.98823831 | 0.171169289 |
| Train | 70.88142574 | 0.128224074 |
| Train | 78.43412269 | 0.598492235 |
| Train | 57.65308548 | 0.002539977 |
| Train | 61.19854329 | 0.00749581 |
| Train | 59.05411487 | 0.003897755 |
| Train | 54.34262305 | 0.000921884 |
| Train | 55.60929508 | 0.001358846 |
| Train | 62.80974945 | 0.012226697 |
| Train | 71.56514313 | 0.153540268 |
| Train | 64.87422227 | 0.022780946 |
| Train | 55.67895741 | 0.001388144 |
| Train | 72.2058558 | 0.180844963 |
| Train | 50.62705713 | 0.000295218 |
| Train | 41.42861909 | 1.75913E-05 |
| Train | 56.94736408 | 0.002046741 |
| Train | 38.05824543 | 6.25847E-06 |
| Train | 50.35240555 | 0.00027138 |
| Train | 85.10210689 | 0.920109829 |
| Train | 57.92203189 | 0.002757723 |
| Train | 52.89451613 | 0.000591526 |
| Train | 49.42986089 | 0.000204527 |
| Train | 56.40404591 | 0.001733185 |
| Train | 75.09197372 | 0.348499485 |
| Train | 51.31370543 | 0.00036438 |
| Train | 55.92652301 | 0.001497461 |
| Train | 62.53399429 | 0.011246504 |
| Train | 68.1073916 | 0.05911279 |
| Train | 47.39977339 | 0.00010976 |
| Train | 66.47847342 | 0.036725663 |
| Train | 73.86799265 | 0.268752755 |
| Train | 50.22180143 | 0.000260729 |
| Train | 83.66738235 | 0.88120593 |
| Train | 59.52122117 | 0.004495302 |
| Train | 43.62403366 | 3.44871E-05 |
| Train | 53.32573292 | 0.000675092 |
| Train | 47.59837089 | 0.000116651 |
| Train | 55.53655316 | 0.001328912 |
| Train | 53.91141317 | 0.000807795 |
| Train | 71.39172105 | 0.146755582 |
| Train | 54.6653232 | 0.001017674 |
| Train | 83.24206815 | 0.866860746 |
| Train | 62.50478731 | 0.011147347 |
| Train | 52.46548273 | 0.000518646 |
| Train | 71.40398324 | 0.147227005 |
| Train | 76.55278058 | 0.455690664 |
| Train | 42.76398592 | 2.64928E-05 |
| Train | 52.14656227 | 0.00047035 |
| Train | 52.01655848 | 0.000451977 |
| Train | 55.96361518 | 0.001514564 |
| Train | 83.98183298 | 0.890934526 |
| Train | 53.12050166 | 0.000633943 |
| Train | 61.57786248 | 0.00841262 |
| Train | 69.40121535 | 0.085439041 |
| Train | 51.61099337 | 0.000399144 |
| Train | 86.32528562 | 0.943689314 |
| Train | 55.14206872 | 0.001177682 |
| Train | 53.74082819 | 0.000766659 |
| Train | 46.60388767 | 8.59933E-05 |
| Train | 41.59424517 | 1.85078E-05 |
| Train | 58.87272416 | 0.003687654 |
| Train | 43.90442765 | 3.75834E-05 |
| Train | 79.45278685 | 0.670743004 |
| Train | 72.54308684 | 0.196672013 |
| Train | 59.23374674 | 0.004117565 |
| Train | 44.9379729 | 5.15974E-05 |
| Train | 58.04360533 | 0.00286217 |
| Train | 44.61071021 | 4.66711E-05 |
| Train | 61.06910702 | 0.007206229 |
| Train | 56.09622849 | 0.001577322 |
| Train | 52.87715193 | 0.000588387 |
| Train | 53.73095525 | 0.000764343 |
| Train | 71.0816892 | 0.135246605 |
| Train | 38.38256868 | 6.91287E-06 |
| Train | 40.6941598 | 1.4044E-05 |
| Train | 57.15579871 | 0.002181532 |
| Train | 55.62132328 | 0.00136386 |
| Train | 54.7717852 | 0.001051409 |
| Train | 58.52248042 | 0.003313378 |
| Train | 58.07125353 | 0.002886468 |
| Train | 57.47714224 | 0.002406895 |
| Train | 78.51918764 | 0.604743734 |
| Train | 55.47392049 | 0.001303666 |
| Train | 55.18840489 | 0.001194514 |
| Train | 37.51169148 | 5.29277E-06 |
| Train | 63.39473881 | 0.014593885 |
| Train | 77.15702173 | 0.501895196 |
| Train | 49.05811164 | 0.000182496 |
| Train | 79.09695004 | 0.646213017 |
| Train | 44.07505847 | 3.96021E-05 |
| Train | 54.07355643 | 0.000848938 |
| Train | 50.81008593 | 0.000312255 |
| Train | 53.80246763 | 0.000781276 |
| Train | 55.14401628 | 0.001178385 |
| Train | 53.98772245 | 0.000826904 |
| Train | 54.32718141 | 0.000917533 |
| Train | 67.22516851 | 0.045742812 |
| Train | 48.29329573 | 0.000144351 |
| Train | 69.15511774 | 0.07972395 |
| Train | 44.94711707 | 5.17423E-05 |
| Train | 63.18676086 | 0.013704589 |
| Train | 70.34745716 | 0.111007803 |
| Train | 55.17180442 | 0.001188456 |
| Train | 60.97122574 | 0.006994645 |
| Train | 48.90237503 | 0.000173988 |
| Train | 40.62447205 | 1.37471E-05 |
| Train | 39.31616672 | 9.20418E-06 |
| Train | 44.82821585 | 4.98899E-05 |
| Train | 39.43007758 | 9.53136E-06 |
| Train | 54.690522 | 0.00102556 |
| Train | 51.98581062 | 0.000447737 |
| Train | 96.65705289 | 0.997495151 |
| Train | 60.4069376 | 0.005889817 |
| Train | 47.55810948 | 0.00011522 |
| Train | 42.26924462 | 2.27637E-05 |
| Train | 47.71520699 | 0.000120905 |
| Train | 55.85325549 | 0.001464242 |
| Train | 41.52172976 | 1.81008E-05 |
| Train | 43.91295911 | 3.76819E-05 |
| Train | 75.37432773 | 0.368406033 |
| Train | 101.2135004 | 0.999379396 |
| Train | 102.9883091 | 0.999639774 |
| Train | 44.43956732 | 4.42852E-05 |
| Train | 47.17642054 | 0.000102495 |
| Train | 50.47773788 | 0.00028201 |
| Train | 80.24261888 | 0.721866507 |
| Train | 69.03666306 | 0.077099377 |
| Train | 57.14794363 | 0.002176295 |
| Train | 41.67387609 | 1.89653E-05 |
| Train | 55.07189429 | 0.00115264 |
| Train | 48.69337042 | 0.000163189 |
| Train | 47.23274356 | 0.00010428 |
| Train | 44.16057349 | 4.06542E-05 |
| Train | 52.13092848 | 0.000468101 |
| Train | 60.69216652 | 0.00642469 |
| Train | 64.06187835 | 0.017847528 |
| Train | 55.52298538 | 0.001323402 |
| Train | 70.01308239 | 0.101285757 |
| Train | 55.25268069 | 0.001218262 |
| Train | 43.59865697 | 3.42198E-05 |
| Train | 41.13561622 | 1.60798E-05 |
| Train | 49.14075453 | 0.000187179 |
| Train | 52.32107037 | 0.000496191 |
| Train | 50.83577684 | 0.000314724 |
| Train | 48.13458069 | 0.000137495 |
| Train | 57.8894809 | 0.00273041 |
| Train | 54.10517264 | 0.000857201 |
| Train | 52.53457616 | 0.000529746 |
| Train | 62.4833362 | 0.011075075 |
| Train | 54.51700948 | 0.000972473 |
| Train | 52.01845507 | 0.00045224 |
| Train | 60.69622448 | 0.006432639 |
| Train | 52.33595178 | 0.00049846 |
| Train | 79.1625935 | 0.650801276 |
| Train | 71.59528835 | 0.154745429 |
| Train | 63.36488815 | 0.014462828 |
| Train | 50.93407684 | 0.000324352 |
| Train | 76.8031397 | 0.474787878 |
| Train | 37.25991455 | 4.89953E-06 |
| Train | 58.5373117 | 0.003328431 |
| Train | 50.415671 | 0.000276695 |
| Train | 76.85792608 | 0.478978711 |
| Train | 59.26694458 | 0.00415952 |
| Train | 58.47321526 | 0.003263863 |
| Train | 42.68232016 | 2.58376E-05 |
| Train | 64.35725597 | 0.019506517 |
| Train | 68.1058172 | 0.059085952 |
| Train | 45.95634889 | 7.05079E-05 |
| Train | 60.19487974 | 0.005521065 |
| Train | 50.40254594 | 0.000275584 |
| Train | 49.32463612 | 0.000198034 |
| Train | 65.09133796 | 0.024311105 |
| Train | 44.86941473 | 5.05241E-05 |
| Train | 47.43892435 | 0.000111085 |
| Train | 40.57223921 | 1.35287E-05 |
| Train | 48.04258591 | 0.000133671 |
| Train | 41.43989791 | 1.76523E-05 |
| Train | 64.59927355 | 0.020977671 |
| Train | 56.88708024 | 0.002009329 |
| Train | 75.70883027 | 0.392577627 |
| Train | 61.93603442 | 0.009380061 |
| Train | 53.21258421 | 0.000652086 |
| Train | 64.81897555 | 0.022406841 |
| Train | 50.88567408 | 0.000319575 |
| Train | 50.4560659 | 0.000280142 |
| Train | 55.35806186 | 0.001258221 |
| Train | 64.57063587 | 0.020798075 |
| Train | 48.42391624 | 0.000150249 |
| Train | 56.41054475 | 0.001736637 |
| Train | 67.97231513 | 0.056850754 |
| Train | 75.0440071 | 0.345167472 |
| Train | 77.52597629 | 0.530142089 |
| Train | 59.29322129 | 0.004193029 |
| Train | 48.27629313 | 0.0001436 |
| Train | 80.86828231 | 0.758704638 |
| Train | 56.22548051 | 0.001640988 |
| Train | 78.2605742 | 0.585639948 |
| Train | 45.33645257 | 5.8303E-05 |
| Train | 68.0960053 | 0.0589189 |
| Train | 52.16163023 | 0.000472527 |
| Train | 53.37473083 | 0.000685305 |
| Train | 52.58726117 | 0.000538369 |
| Train | 48.17445859 | 0.000139186 |
| Train | 47.21649235 | 0.000103762 |
| Train | 58.90929612 | 0.003729086 |
| Train | 47.78809551 | 0.000123638 |
| Train | 53.29368081 | 0.000668494 |
| Train | 56.18876234 | 0.001622645 |
| Train | 57.16499833 | 0.002187682 |
| Train | 35.83311827 | 3.16335E-06 |
| Train | 53.30491997 | 0.000670801 |
| Train | 45.84902239 | 6.82254E-05 |
| Train | 55.16123605 | 0.001184616 |
| Train | 38.01333201 | 6.17287E-06 |
| Train | 50.15343315 | 0.000255322 |
| Train | 55.97926115 | 0.001521837 |
| Train | 52.33361955 | 0.000498103 |
| Train | 68.50093995 | 0.066192752 |
| Train | 62.37970358 | 0.010732384 |
| Train | 52.92774377 | 0.00059758 |
| Train | 63.97640416 | 0.017393872 |
| Train | 52.14731048 | 0.000470458 |
| Train | 54.43297582 | 0.000947758 |
| Train | 80.27226153 | 0.723687764 |
| Train | 44.45992211 | 4.45624E-05 |
| Train | 54.43280634 | 0.000947709 |
| Train | 77.67536798 | 0.541535081 |
| Train | 59.03828441 | 0.003878954 |
| Train | 47.3400557 | 0.000107768 |
| Train | 44.86205856 | 5.04103E-05 |
| Train | 56.41518944 | 0.001739107 |
| Train | 54.96248346 | 0.001114653 |
| Train | 54.63442279 | 0.001008087 |
| Train | 60.46071179 | 0.005987155 |
| Train | 48.42765394 | 0.000150421 |
| Train | 69.45009664 | 0.086617575 |
| Train | 56.45474385 | 0.001760292 |
| Train | 52.9487753 | 0.000601444 |
| Train | 46.03095617 | 7.21395E-05 |
| Train | 62.54886518 | 0.011297325 |
| Train | 52.22317179 | 0.000481524 |
| Train | 91.4704559 | 0.987830933 |
| Train | 51.85291188 | 0.000429866 |
| Train | 80.31957162 | 0.726579285 |
| Train | 51.04192665 | 0.000335254 |
| Train | 49.15130393 | 0.000187786 |
| Train | 38.6691811 | 7.5479E-06 |
| Train | 49.0634734 | 0.000182797 |
| Train | 74.72023352 | 0.323084857 |
| Train | 66.07636698 | 0.032604283 |
| Train | 41.41262094 | 1.75053E-05 |
| Train | 58.20705826 | 0.003008837 |
| Train | 71.38563762 | 0.146522162 |
| Train | 54.86444602 | 0.001081679 |
| Train | 62.80366457 | 0.012204189 |
| Train | 70.15536641 | 0.105326887 |
| Train | 50.5124469 | 0.000285026 |
| Train | 44.8063244 | 4.95561E-05 |
| Train | 45.71348897 | 6.54483E-05 |
| Train | 52.32772311 | 0.000497204 |
| Train | 52.68582479 | 0.000554879 |
| Train | 52.15844736 | 0.000472066 |
| Train | 63.58808524 | 0.015471488 |
| Train | 50.73204202 | 0.000304874 |
| Train | 41.66485331 | 1.89129E-05 |
| Train | 53.97862207 | 0.000824602 |
| Train | 53.44282358 | 0.000699754 |
| Train | 52.3088146 | 0.000494331 |
| Train | 56.51747544 | 0.001794419 |
| Train | 62.24744935 | 0.010310249 |
| Train | 88.91269369 | 0.973719806 |
| Train | 46.78245476 | 9.08328E-05 |
| Train | 46.81791855 | 9.18258E-05 |
| Train | 41.83400647 | 1.99197E-05 |
| Train | 64.3984855 | 0.019749792 |
| Train | 64.33276073 | 0.019363374 |
| Train | 75.38514291 | 0.369177986 |
| Train | 67.35986695 | 0.047579942 |
| Train | 55.95691875 | 0.001511462 |
| Train | 60.24658593 | 0.005608805 |
| Train | 70.05677451 | 0.102511809 |
| Train | 67.92159432 | 0.056022529 |
| Train | 47.55544979 | 0.000115126 |
| Train | 50.73728148 | 0.000305364 |
| Train | 56.88238208 | 0.002006442 |
| Train | 57.74286639 | 0.002610689 |
| Train | 63.73970041 | 0.016195828 |
| Train | 62.23535028 | 0.010272459 |
| Train | 47.58803682 | 0.000116282 |
| Train | 56.72626895 | 0.001912836 |
| Train | 56.11009027 | 0.001584031 |
| Train | 75.07537412 | 0.347344719 |
| Train | 47.41218356 | 0.000110178 |
| Train | 43.49049598 | 3.31035E-05 |
| Train | 82.55712936 | 0.840701216 |
| Train | 75.34703348 | 0.366460746 |
| Train | 58.45950909 | 0.003250219 |
| Train | 50.40252166 | 0.000275581 |
| Train | 43.76881551 | 3.60526E-05 |
| Train | 50.36351201 | 0.000272306 |
| Train | 65.65315852 | 0.028750294 |
| Train | 52.23252611 | 0.000482907 |
| Train | 61.34653297 | 0.007841071 |
| Train | 54.56325426 | 0.000986347 |
| Train | 53.87611908 | 0.000799107 |
| Train | 47.88346974 | 0.000127306 |
| Train | 64.398878 | 0.019752122 |
| Train | 55.3515666 | 0.001255721 |
| Train | 47.72385566 | 0.000121226 |
| Train | 66.99590323 | 0.042770308 |
| Train | 56.23606421 | 0.001646314 |
| Train | 47.87528293 | 0.000126987 |
| Train | 44.20460449 | 4.12068E-05 |
| Train | 49.79564023 | 0.000228798 |
| Train | 59.25904835 | 0.004149501 |
| Train | 58.98646325 | 0.003818036 |
| Train | 52.75950364 | 0.000567551 |
| Train | 43.13082339 | 2.96468E-05 |
| Train | 79.73409541 | 0.689505172 |
| Train | 47.97547897 | 0.000130949 |
| Train | 42.87517769 | 2.74116E-05 |
| Train | 72.48548559 | 0.193896369 |
| Train | 46.50023831 | 8.33034E-05 |
| Train | 44.28189273 | 4.2195E-05 |
| Train | 51.24547898 | 0.000356839 |
| Train | 54.8770173 | 0.001085852 |
| Train | 73.58439675 | 0.252009951 |
| Train | 81.97308912 | 0.815231132 |
| Train | 52.55578421 | 0.0005332 |
| Train | 64.62100619 | 0.021114972 |
| Train | 68.72915872 | 0.070651899 |
| Train | 67.77958882 | 0.053763783 |
| Train | 45.53975382 | 6.20531E-05 |
| Train | 56.56259274 | 0.001819372 |
| Train | 49.49413943 | 0.000208597 |
| Train | 49.75677642 | 0.000226088 |
| Train | 62.85855298 | 0.012408764 |
| Train | 58.96890876 | 0.003797618 |
| Train | 73.27676556 | 0.234647465 |
| Train | 55.59003308 | 0.001350854 |
| Train | 48.99359188 | 0.000178922 |
| Train | 56.4977064 | 0.001783594 |
| Train | 82.06361249 | 0.819375666 |
| Train | 76.51190116 | 0.452583257 |
| Train | 54.52708823 | 0.00097548 |
| Train | 58.34369087 | 0.003137171 |
| Train | 59.36840473 | 0.004290398 |
| Train | 54.57428053 | 0.000989685 |
| Train | 51.36329217 | 0.000369961 |
| Train | 51.72545166 | 0.000413396 |
| Train | 47.49482183 | 0.000113005 |
| Train | 47.47981815 | 0.000112487 |
| Train | 55.94963147 | 0.001508093 |
| Train | 58.00675463 | 0.0028301 |
| Train | 54.13074528 | 0.000863944 |
| Train | 61.80224597 | 0.00900643 |
| Train | 43.18677638 | 3.01598E-05 |
| Train | 61.16907492 | 0.007428883 |
| Train | 50.57826313 | 0.000290835 |
| Train | 50.53778364 | 0.000287249 |
| Train | 70.71206267 | 0.12253015 |
| Train | 58.1635172 | 0.002969051 |
| Train | 58.92335141 | 0.003745133 |
| Train | 48.48189127 | 0.000152944 |
| Train | 104.7252361 | 0.99978849 |
| Train | 56.87658579 | 0.002002887 |
| Train | 51.40394173 | 0.000374599 |
| Train | 66.75882651 | 0.039890987 |
| Train | 44.10329292 | 3.99464E-05 |
| Train | 68.47431263 | 0.065689882 |
| Train | 72.04180092 | 0.173511984 |
| Train | 69.38649417 | 0.085087021 |
| Train | 45.84277942 | 6.80949E-05 |
| Train | 52.18524125 | 0.000475959 |
| Train | 48.6760281 | 0.000162323 |
| Train | 59.55964171 | 0.004548333 |
| Train | 42.71131605 | 2.60683E-05 |
| Train | 52.48737988 | 0.000522138 |
| Train | 50.91562735 | 0.000322523 |
| Train | 75.20028381 | 0.356077687 |
| Train | 62.02190818 | 0.009627928 |
| Train | 43.05592248 | 2.89737E-05 |
| Train | 52.60781342 | 0.00054177 |
| Train | 52.22580028 | 0.000481912 |
| Train | 73.15952272 | 0.228252791 |
| Train | 46.57699057 | 8.5287E-05 |
| Train | 89.42341756 | 0.977443471 |
| Train | 47.29502755 | 0.000106291 |
| Train | 43.01654187 | 2.86259E-05 |
| Train | 52.62812594 | 0.000545153 |
| Train | 53.46101124 | 0.000703665 |
| Train | 54.85944775 | 0.001080024 |
| Train | 71.61982792 | 0.155732264 |
| Train | 50.66853884 | 0.000298996 |
| Train | 71.39517365 | 0.14688821 |
| Train | 49.11989833 | 0.000185986 |
| Train | 45.93834299 | 7.01198E-05 |
| Train | 54.75574012 | 0.001046255 |
| Train | 62.56755278 | 0.011361509 |
| Train | 56.83905144 | 0.001980011 |
| Train | 42.91001425 | 2.7706E-05 |
| Train | 75.87021183 | 0.404438605 |
| Train | 82.52730186 | 0.839472494 |
| Train | 79.066168 | 0.644052126 |
| Train | 50.7142735 | 0.000303218 |
| Train | 60.51512114 | 0.006087269 |
| Train | 35.24251714 | 2.63935E-06 |
| Train | 54.5599654 | 0.000985354 |
| Train | 75.3417081 | 0.366081721 |
| Train | 49.36393395 | 0.000200435 |
| Train | 40.31414554 | 1.24993E-05 |
| Train | 45.759178 | 6.63716E-05 |
| Train | 61.76744084 | 0.008911668 |
| Train | 52.6269493 | 0.000544957 |
| Train | 45.87146466 | 6.86965E-05 |
| Train | 66.14105021 | 0.033235705 |
| Train | 71.28570975 | 0.142731666 |
| Train | 44.89656817 | 5.09465E-05 |
| Train | 50.41879654 | 0.00027696 |
| Train | 61.91025429 | 0.009306886 |
| Train | 63.07603237 | 0.013253139 |
| Train | 53.93346787 | 0.000813272 |
| Train | 53.58292849 | 0.000730449 |
| Train | 85.8727743 | 0.935845472 |
| Train | 51.70405703 | 0.000410694 |
| Train | 83.85473535 | 0.887089434 |
| Train | 50.03357798 | 0.000246111 |
| Train | 47.56338186 | 0.000115406 |
| Train | 52.09349145 | 0.000462761 |
| Train | 54.46405774 | 0.000956825 |
| Train | 73.4188803 | 0.242563772 |
| Train | 67.74026754 | 0.053153661 |
| Train | 50.9857798 | 0.000329534 |
| Train | 55.35603904 | 0.001257442 |
| Train | 64.03146793 | 0.017684809 |
| Train | 58.85316295 | 0.003665683 |
| Train | 49.47560003 | 0.000207415 |
| Train | 51.72080481 | 0.000412807 |
| Train | 42.47286728 | 2.42303E-05 |
| Train | 79.41827995 | 0.66840195 |
| Train | 44.69633476 | 4.79127E-05 |
| Train | 59.73152423 | 0.004793306 |
| Train | 51.16763802 | 0.000348425 |
| Train | 46.19161088 | 7.5782E-05 |
| Train | 49.14814952 | 0.000187604 |
| Train | 62.32577761 | 0.010558236 |
| Train | 58.72986639 | 0.003530159 |
| Train | 44.41558134 | 4.39606E-05 |
| Train | 46.04407765 | 7.24303E-05 |
| Train | 48.75702505 | 0.000166405 |
| Train | 51.7900076 | 0.000421657 |
| Train | 45.02605045 | 5.30099E-05 |
| Train | 64.84509513 | 0.022582959 |
| Train | 59.34970682 | 0.004265974 |
| Train | 54.65770169 | 0.001015301 |
| Train | 98.77081783 | 0.998688378 |
| Train | 48.90017176 | 0.00017387 |
| Train | 50.79352445 | 0.000310674 |
| Train | 54.0710139 | 0.000848277 |
| Train | 57.68945931 | 0.002568392 |
| Train | 81.31403366 | 0.782836792 |
| Train | 49.3841504 | 0.000201681 |
| Train | 44.79571587 | 4.93952E-05 |
| Train | 79.2565079 | 0.657317006 |
| Train | 66.17524793 | 0.033574309 |
| Train | 79.00458375 | 0.639711301 |
| Train | 48.13502842 | 0.000137514 |
| Train | 72.41082243 | 0.190343039 |
| Train | 84.60150715 | 0.908073656 |
| Train | 63.66976709 | 0.015857668 |
| Train | 75.76605331 | 0.396769597 |
| Train | 55.81919743 | 0.001449051 |
| Train | 58.75926901 | 0.003562016 |
| Train | 50.61268678 | 0.000293921 |
| Train | 55.9899904 | 0.001526844 |
| Train | 56.48387821 | 0.00177606 |
| Train | 71.82066442 | 0.164002081 |
| Train | 48.17829361 | 0.00013935 |
| Train | 59.51513065 | 0.004486955 |
| Train | 54.27757977 | 0.000903696 |
| Train | 61.3444858 | 0.007836188 |
| Train | 59.5224321 | 0.004496964 |
| Train | 68.59086537 | 0.067917691 |
| Train | 46.43299584 | 8.16035E-05 |
| Train | 74.91343971 | 0.336174947 |
| Train | 50.71135977 | 0.000302947 |
| Train | 78.79757385 | 0.624955148 |
| Train | 54.70674674 | 0.00103067 |
| Train | 62.73347489 | 0.011947434 |
| Train | 51.57188437 | 0.000394388 |
| Train | 47.67006331 | 0.000119243 |
| Train | 57.77365552 | 0.002635388 |
| Train | 56.50585999 | 0.001788051 |
| Train | 62.18078382 | 0.010103727 |
| Train | 58.80050873 | 0.003607183 |
| Train | 46.20368513 | 7.6063E-05 |
| Train | 75.32125992 | 0.364627819 |
| Train | 68.83680444 | 0.072850152 |
| Train | 50.31339567 | 0.000268154 |
| Train | 53.47747905 | 0.000707225 |
| Train | 65.70367512 | 0.029186017 |
| Train | 45.85505446 | 6.83517E-05 |
| Train | 58.5869913 | 0.003379351 |
| Train | 87.17909693 | 0.956090592 |
| Train | 47.77860681 | 0.000123278 |
| Train | 47.42827013 | 0.000110723 |
| Train | 54.50424177 | 0.000968677 |
| Train | 66.32540388 | 0.035100808 |
| Train | 78.42656802 | 0.597935429 |
| Train | 77.87994874 | 0.557064319 |
| Train | 52.98420648 | 0.00060801 |
| Train | 46.82470977 | 9.20172E-05 |
| Train | 55.60937341 | 0.001358878 |
| Train | 46.16570311 | 7.51824E-05 |
| Train | 54.29940526 | 0.000909759 |
| Train | 43.12093029 | 2.9557E-05 |
| Train | 62.16168863 | 0.010045335 |
| Train | 66.98842369 | 0.04267648 |
| Train | 51.8618258 | 0.000431042 |
| Train | 54.58393169 | 0.000992615 |
| Train | 66.45118915 | 0.036430829 |
| Train | 56.31381951 | 0.001685971 |
| Train | 47.77109534 | 0.000122995 |
| Train | 52.27761 | 0.000489626 |
| Train | 49.5327966 | 0.000211084 |
| Train | 58.67015935 | 0.003466338 |
| Train | 54.20842944 | 0.000884752 |
| Train | 48.95662275 | 0.000176905 |
| Train | 67.80997246 | 0.054239717 |
| Train | 66.34802697 | 0.035336504 |
| Train | 49.43849525 | 0.000205069 |
| Train | 50.92746871 | 0.000323696 |
| Train | 59.62286748 | 0.004636962 |
| Train | 50.25801682 | 0.00026364 |
| Train | 49.85525192 | 0.000233017 |
| Train | 85.59113959 | 0.930461221 |
| Train | 82.5932557 | 0.842179131 |
| Train | 61.93801417 | 0.009385699 |
| Train | 82.71795774 | 0.847195303 |
| Train | 75.69998973 | 0.391931369 |
| Train | 77.51795478 | 0.529529365 |
| Train | 91.87957161 | 0.989250248 |
| Train | 51.8627014 | 0.000431158 |
| Train | 79.06545346 | 0.644001857 |
| Train | 53.69212274 | 0.000755302 |
| Train | 50.57250356 | 0.000290322 |
| Train | 54.44658487 | 0.000951717 |
| Train | 48.65204599 | 0.000161134 |
| Train | 43.7181068 | 3.54964E-05 |
| Train | 45.37273132 | 5.89552E-05 |
| Train | 55.35362776 | 0.001256513 |
| Train | 73.80724473 | 0.265107731 |
| Train | 50.1545188 | 0.000255407 |
| Train | 52.26110285 | 0.000487155 |
| Train | 75.97713255 | 0.41235983 |
| Train | 47.67939927 | 0.000119585 |
| Train | 62.2682338 | 0.010375482 |
| Train | 66.63770072 | 0.038492538 |
| Train | 46.91680034 | 9.46524E-05 |
| Train | 55.41203924 | 0.001279193 |
| Train | 50.68886778 | 0.000300865 |
| Train | 51.73851891 | 0.000415055 |
| Train | 59.37021878 | 0.004292775 |
| Train | 52.81284893 | 0.000576906 |
| Train | 50.43021289 | 0.000277931 |
| Train | 44.16579595 | 4.07194E-05 |
| Train | 42.38056183 | 2.35542E-05 |
| Train | 58.18218084 | 0.00298604 |
| Train | 57.28897967 | 0.00227226 |
| Train | 79.07577471 | 0.644727121 |
| Train | 59.00291804 | 0.003837275 |
| Train | 62.03339245 | 0.00966156 |
| Train | 87.15695218 | 0.955804601 |
| Train | 51.86838384 | 0.000431909 |
| Train | 50.8790849 | 0.00031893 |
| Train | 59.5062019 | 0.00447474 |
| Train | 49.17472614 | 0.000189139 |
| Train | 66.6175486 | 0.038264475 |
| Train | 51.25420877 | 0.000357795 |
| Train | 60.54497816 | 0.006142913 |
| Train | 73.60270371 | 0.253069612 |
| Train | 68.96979114 | 0.075652899 |
| Train | 67.11672143 | 0.044313 |
| Train | 84.50896497 | 0.905677226 |
| Train | 47.52831928 | 0.000114172 |
| Train | 51.00922991 | 0.000331911 |
| Train | 59.32145379 | 0.004229332 |
| Train | 52.00181666 | 0.000449939 |
| Train | 60.01812301 | 0.005231312 |
| Train | 52.60674802 | 0.000541593 |
| Train | 60.88211332 | 0.006807386 |
| Train | 69.59148608 | 0.090109653 |
| Train | 58.00435438 | 0.002828024 |
| Train | 53.8075368 | 0.00078249 |
| Train | 72.51393525 | 0.195263556 |
| Train | 77.66153768 | 0.54048199 |
| Train | 51.73282811 | 0.000414331 |
| Train | 51.20493491 | 0.000352432 |
| Train | 61.11757606 | 0.007313339 |
| Train | 53.25428331 | 0.000660472 |
| Train | 50.62192204 | 0.000294754 |
| Train | 52.59285741 | 0.000539293 |
| Train | 51.95409223 | 0.000443406 |
| Train | 46.28949606 | 7.80909E-05 |
| Train | 71.32809943 | 0.14432955 |
| Train | 55.84092323 | 0.001458723 |
| Train | 66.76860591 | 0.040006011 |
| Train | 56.20324418 | 0.001629855 |
| Train | 58.75797997 | 0.003560614 |
| Train | 47.10709215 | 0.000100339 |
| Train | 56.44461853 | 0.001754845 |
| Train | 55.85624575 | 0.001465583 |
| Train | 65.17104382 | 0.024897628 |
| Train | 49.34914957 | 0.000199528 |
| Train | 58.20585261 | 0.003007728 |
| Train | 55.85938902 | 0.001466994 |
| Train | 65.95776032 | 0.031476459 |
| Train | 57.50898084 | 0.002430451 |
| Train | 54.71019225 | 0.001031758 |
| Train | 77.08611048 | 0.496459 |
| Train | 63.13539858 | 0.013493327 |
| Train | 49.91439445 | 0.000237281 |
| Train | 57.70935944 | 0.002584072 |
| Train | 53.00856806 | 0.000612566 |
| Train | 46.32584794 | 7.89661E-05 |
| Train | 52.30194491 | 0.000493291 |
| Train | 52.93281748 | 0.00059851 |
| Train | 64.59806701 | 0.020970079 |
| Train | 43.87792347 | 3.72792E-05 |
| Train | 52.88100744 | 0.000589082 |
| Train | 74.75874052 | 0.325672612 |
| Train | 44.66719348 | 4.74865E-05 |
| Train | 70.29750809 | 0.10950532 |
| Train | 60.48379316 | 0.006029424 |
| Train | 52.90847422 | 0.000594062 |
| Train | 41.5511672 | 1.8265E-05 |
| Train | 55.99158294 | 0.001527588 |
| Train | 66.4360836 | 0.036268558 |
| Train | 75.96364811 | 0.411358217 |
| Train | 57.05907827 | 0.002117918 |
| Train | 57.96702375 | 0.002795926 |
| Train | 63.58595687 | 0.015461546 |
| Train | 57.47939718 | 0.002408556 |
| Train | 60.36033658 | 0.005806736 |
| Train | 73.23654847 | 0.232440101 |
| Train | 40.36393255 | 1.26916E-05 |
| Train | 70.57778401 | 0.118171455 |
| Train | 47.65653817 | 0.00011875 |
| Train | 46.96525686 | 9.60692E-05 |
| Train | 51.55933419 | 0.000392874 |
| Train | 64.97985318 | 0.023513279 |
| Train | 51.81535894 | 0.000424946 |
| Train | 60.53577026 | 0.006125697 |
| Train | 54.53151241 | 0.000976803 |
| Train | 84.4982901 | 0.905397253 |
| Train | 60.09292186 | 0.005352036 |
| Train | 45.94515598 | 7.02664E-05 |
| Train | 53.33957206 | 0.000677961 |
| Train | 51.70837419 | 0.000411238 |
| Train | 67.29780797 | 0.04672498 |
| Train | 69.6869836 | 0.092539583 |
| Train | 52.68872289 | 0.000555372 |
| Train | 56.44252081 | 0.001753718 |
| Train | 49.67937995 | 0.000220786 |
| Train | 46.57159492 | 8.51461E-05 |
| Train | 44.50060519 | 4.51218E-05 |
| Train | 50.60528106 | 0.000293254 |
| Train | 52.2750229 | 0.000489238 |
| Train | 56.68899845 | 0.00189114 |
| Train | 73.50331081 | 0.24735203 |
| Train | 59.88023305 | 0.005015818 |
| Train | 53.55038789 | 0.000723202 |
| Train | 45.12158473 | 5.45857E-05 |
| Train | 76.86821858 | 0.47976645 |
| Train | 70.67056529 | 0.121168501 |
| Train | 48.09785007 | 0.000135955 |
| Train | 54.73575884 | 0.001039871 |
| Train | 80.65759294 | 0.74668047 |
| Train | 47.32308512 | 0.000107209 |
| Train | 66.76718949 | 0.039989339 |
| Train | 48.9668363 | 0.00017746 |
| Train | 56.62322754 | 0.001853452 |
| Train | 76.74278978 | 0.470175538 |
| Train | 48.87475254 | 0.00017252 |
| Train | 78.90374765 | 0.632554473 |
| Train | 66.86186325 | 0.041118834 |
| Train | 72.92959074 | 0.216071477 |
| Train | 49.4768578 | 0.000207495 |
| Train | 45.92646167 | 6.98648E-05 |
| Train | 63.59881619 | 0.015521691 |
| Train | 44.29833323 | 4.24083E-05 |
| Train | 48.59982513 | 0.000158575 |
| Train | 65.22622571 | 0.02531176 |
| Train | 55.32118683 | 0.001244092 |
| Train | 58.79090368 | 0.003596612 |
| Train | 45.46143281 | 6.05806E-05 |
| Train | 72.08254483 | 0.175310971 |
| Train | 48.42186075 | 0.000150154 |
| Train | 50.10497414 | 0.000251557 |
| Train | 51.26241121 | 0.000358696 |
| Train | 56.02092547 | 0.001541374 |
| Train | 79.72414918 | 0.688851824 |
| Train | 53.05312048 | 0.000620987 |
| Train | 51.96189996 | 0.000444468 |
| Train | 59.7446378 | 0.004812526 |
| Train | 52.96574793 | 0.000604581 |
| Train | 41.7556487 | 1.94468E-05 |
| Train | 74.48368457 | 0.307429215 |
| Train | 82.5757017 | 0.84146243 |
| Train | 59.03385665 | 0.00387371 |
| Train | 58.40016591 | 0.003191797 |
| Train | 55.11664232 | 0.001168546 |
| Train | 49.7502495 | 0.000225636 |
| Train | 63.17038891 | 0.013636896 |
| Train | 46.73530034 | 8.95289E-05 |
| Train | 49.62691316 | 0.000217264 |
| Train | 47.98665241 | 0.000131398 |
| Train | 47.07741643 | 9.94304E-05 |
| Train | 62.90578011 | 0.01258749 |
| Train | 67.1586458 | 0.044860635 |
| Train | 53.09303916 | 0.00062863 |
| Train | 39.45705797 | 9.61054E-06 |
| Train | 57.13360317 | 0.002166767 |
| Train | 59.96538437 | 0.005147825 |
| Train | 57.76824046 | 0.002631028 |
| Train | 77.32166255 | 0.514512074 |
| Train | 53.3731791 | 0.000684979 |
| Train | 56.43523585 | 0.001749812 |
| Train | 64.66596271 | 0.021401785 |
| Train | 68.64913423 | 0.069057587 |
| Train | 39.52593482 | 9.81567E-06 |
| Train | 52.28038351 | 0.000490042 |
| Train | 47.80687757 | 0.000124352 |
| Train | 48.41546235 | 0.00014986 |
| Train | 74.11657727 | 0.283994187 |
| Train | 70.81091008 | 0.125826396 |
| Train | 58.85698372 | 0.003669963 |
| Train | 42.37049882 | 2.34816E-05 |
| Train | 78.72206331 | 0.619512635 |
| Train | 50.71117952 | 0.00030293 |
| Train | 44.22309122 | 4.14411E-05 |
| Train | 68.65121536 | 0.069098603 |
| Train | 58.54294343 | 0.003334164 |
| Train | 59.88412413 | 0.005021776 |
| Train | 65.38416276 | 0.026534416 |
| Train | 54.52468796 | 0.000974763 |
| Train | 69.49529041 | 0.087720227 |
| Train | 51.43100456 | 0.00037772 |
| Train | 63.06763107 | 0.013219498 |
| Train | 45.52421381 | 6.17581E-05 |
| Train | 56.19490144 | 0.001625698 |
| Train | 56.80518527 | 0.001959596 |
| Train | 78.01263054 | 0.567078478 |
| Train | 47.75067568 | 0.000122227 |
| Train | 48.43935567 | 0.000150962 |
| Train | 51.50463729 | 0.000386342 |
| Train | 52.07855642 | 0.000460648 |
| Train | 90.72965187 | 0.984774725 |
| Train | 48.04193507 | 0.000133644 |
| Train | 61.97080563 | 0.009479656 |
| Train | 67.66937969 | 0.052070266 |
| Train | 60.73375832 | 0.006506618 |
| Train | 54.28511184 | 0.000905783 |
| Train | 66.12681593 | 0.033095767 |
| Train | 75.82561665 | 0.401149206 |
| Train | 70.48812369 | 0.115336409 |
| Train | 73.56733823 | 0.251025285 |
| Train | 55.86652149 | 0.001470202 |
| Train | 64.05188196 | 0.017793873 |
| Train | 52.7490262 | 0.000565731 |
| Train | 49.52755066 | 0.000210745 |
| Train | 51.61147298 | 0.000399203 |
| Train | 62.30332064 | 0.010486535 |
| Train | 55.23629532 | 0.001212163 |
| Train | 62.29179325 | 0.010449926 |
| Train | 47.67121269 | 0.000119285 |
| Train | 58.54509843 | 0.003336361 |
| Train | 45.72745469 | 6.57292E-05 |
| Train | 71.7451019 | 0.160850025 |
| Train | 41.88210823 | 2.02157E-05 |
| Train | 53.08789646 | 0.000627641 |
| Train | 77.01339904 | 0.490885906 |
| Train | 47.65391827 | 0.000118654 |
| Train | 47.78038009 | 0.000123345 |
| Train | 50.18178487 | 0.00025755 |
| Train | 48.34243324 | 0.000146542 |
| Train | 57.66312828 | 0.002547791 |
| Train | 58.55485262 | 0.003346321 |
| Train | 77.73113204 | 0.545777269 |
| Train | 54.22974136 | 0.000890548 |
| Train | 59.51961107 | 0.004493093 |
| Train | 47.83248373 | 0.000125332 |
| Train | 58.31655713 | 0.003111258 |
| Train | 58.53267645 | 0.003323719 |
| Train | 58.81022899 | 0.003617912 |
| Train | 50.01149353 | 0.00024445 |
| Train | 74.24523335 | 0.292084003 |
| Train | 51.97999594 | 0.00044694 |
| Train | 55.60305019 | 0.00135625 |
| Train | 57.36967431 | 0.002329053 |
| Train | 56.3006284 | 0.001679176 |
| Train | 43.38507941 | 3.20506E-05 |
| Train | 76.67457649 | 0.464968399 |
| Train | 47.650354 | 0.000118525 |
| Train | 42.58209114 | 2.50556E-05 |
| Train | 52.98602773 | 0.00060835 |
| Train | 58.34642379 | 0.003139793 |
| Train | 48.89048942 | 0.000173355 |
| Train | 55.99648605 | 0.001529883 |
| Train | 75.97702937 | 0.412352157 |
| Train | 56.37256326 | 0.001716563 |
| Train | 53.8893686 | 0.000802357 |
| Train | 54.19633968 | 0.000881481 |
| Train | 47.70495375 | 0.000120526 |
| Train | 59.82799119 | 0.004936501 |
| Train | 67.19310305 | 0.045315539 |
| Train | 56.46809866 | 0.001767503 |
| Train | 59.88069037 | 0.005016519 |
| Train | 75.38814109 | 0.369392072 |
| Train | 62.62515198 | 0.011561616 |
| Train | 47.0942664 | 9.99454E-05 |
| Train | 51.62679926 | 0.000401083 |
| Train | 74.7636807 | 0.326005365 |
| Train | 83.25749165 | 0.867405607 |
| Train | 73.28440507 | 0.235068485 |
| Train | 62.85542938 | 0.012397028 |
| Train | 59.33602581 | 0.004248192 |
| Train | 43.53017009 | 3.35087E-05 |
| Train | 63.64400447 | 0.015734845 |
| Train | 57.05373481 | 0.002114457 |
| Train | 42.23442282 | 2.2522E-05 |
| Train | 53.38829471 | 0.000688159 |
| Train | 71.45185813 | 0.149079721 |
| Train | 50.17528334 | 0.000257038 |
| Train | 56.56811328 | 0.001822448 |
| Train | 74.48730288 | 0.307665474 |
| Train | 52.5245991 | 0.000528128 |
| Train | 63.17700979 | 0.013664233 |
| Train | 68.99135657 | 0.076116682 |
| Train | 52.537564 | 0.000530231 |
| Train | 47.11279016 | 0.000100515 |
| Train | 56.29825508 | 0.001677957 |
| Train | 44.57385873 | 4.61467E-05 |
| Train | 58.57604346 | 0.003368063 |
| Train | 42.75284596 | 2.64024E-05 |
| Train | 50.2437098 | 0.000262486 |
| Train | 60.26355557 | 0.005637902 |
| Train | 48.21182289 | 0.00014079 |
| Train | 76.23413243 | 0.431578752 |
| Train | 66.30866938 | 0.034927409 |
| Train | 49.62898837 | 0.000217402 |
| Train | 76.96357781 | 0.487068515 |
| Train | 70.59699693 | 0.118786759 |
| Train | 77.73494561 | 0.546067202 |
| Train | 53.21807478 | 0.000653184 |
| Train | 49.62735463 | 0.000217293 |
| Train | 47.12760337 | 0.000100972 |
| Train | 51.94003162 | 0.000441499 |
| Train | 69.82744784 | 0.096220569 |
| Train | 43.79690452 | 3.63645E-05 |
| Train | 83.13746354 | 0.863115058 |
| Train | 67.25278277 | 0.046113848 |
| Train | 46.91066548 | 9.44746E-05 |
| Train | 73.07533583 | 0.223737333 |
| Train | 56.01263177 | 0.001537465 |
| Train | 65.35470887 | 0.026302131 |
| Train | 67.84689829 | 0.054823528 |
| Train | 60.13671309 | 0.005423996 |
| Train | 85.19935861 | 0.922274667 |
| Train | 53.48798353 | 0.000709505 |
| Train | 60.49306231 | 0.006046482 |
| Train | 56.2328956 | 0.001644717 |
| Train | 66.87506457 | 0.041278731 |
| Train | 46.35625114 | 7.97057E-05 |
| Train | 42.88386996 | 2.74848E-05 |
| Train | 46.86107454 | 9.30489E-05 |
| Train | 63.67917402 | 0.015902746 |
| Train | 46.99368033 | 9.69101E-05 |
| Train | 63.85650293 | 0.016776501 |
| Train | 50.3609662 | 0.000272093 |
| Train | 51.09477112 | 0.000340729 |
| Train | 71.69401675 | 0.158746796 |
| Train | 50.06642648 | 0.000248601 |
| Train | 47.4820726 | 0.000112565 |
| Train | 48.59977467 | 0.000158572 |
| Train | 56.68939478 | 0.00189137 |
| Train | 56.33913193 | 0.001699086 |
| Train | 41.3255303 | 1.7044E-05 |
| Train | 74.99526278 | 0.341796904 |
| Train | 54.49873695 | 0.000967044 |
| Train | 49.71502512 | 0.000223212 |
| Train | 72.33499697 | 0.186785648 |
| Train | 40.84654093 | 1.47158E-05 |
| Train | 61.16506219 | 0.007419814 |
| Train | 64.22833928 | 0.018764642 |
| Train | 70.5568968 | 0.117505646 |
| Train | 57.1226654 | 0.002159528 |
| Train | 49.30598512 | 0.000196905 |
| Train | 53.1692308 | 0.000643481 |
| Train | 42.20412224 | 2.23137E-05 |
| Train | 41.12319216 | 1.60186E-05 |
| Train | 57.71607709 | 0.002589386 |
| Train | 71.11870909 | 0.136579801 |
| Train | 57.35414807 | 0.002318016 |
| Train | 50.5701298 | 0.000290111 |
| Train | 52.89670986 | 0.000591924 |
| Train | 62.90626802 | 0.012589351 |
| Train | 49.61672204 | 0.000216586 |
| Train | 67.07828355 | 0.043816531 |
| Train | 58.62556018 | 0.003419416 |
| Train | 80.53061847 | 0.739245496 |
| Train | 79.5585145 | 0.677862757 |
| Train | 76.39357035 | 0.443610103 |
| Train | 62.09543572 | 0.009845307 |
| Train | 54.53898867 | 0.000979043 |
| Train | 66.78949702 | 0.040252744 |
| Train | 41.46688339 | 1.7799E-05 |
| Train | 46.32847007 | 7.90297E-05 |
| Train | 65.77141538 | 0.029780366 |
| Train | 45.45653482 | 6.04897E-05 |
| Train | 65.6638264 | 0.02884179 |
| Train | 73.71335675 | 0.259536897 |
| Train | 45.7637323 | 6.64644E-05 |
| Train | 60.29433404 | 0.00569106 |
| Train | 50.48497196 | 0.000282636 |
| Train | 58.50651036 | 0.003297245 |
| Train | 46.59183677 | 8.56762E-05 |
| Train | 44.22404788 | 4.14532E-05 |
| Train | 68.01213274 | 0.057508968 |
| Train | 79.16757275 | 0.651148141 |
| Train | 50.5068784 | 0.00028454 |
| Train | 51.00741862 | 0.000331727 |
| Train | 68.56731741 | 0.067462032 |
| Train | 66.26069218 | 0.034434907 |
| Train | 56.90727672 | 0.002021786 |
| Train | 51.83927674 | 0.000428073 |
| Train | 48.01669794 | 0.000132614 |
| Train | 48.15235051 | 0.000138246 |
| Train | 73.60922998 | 0.253448071 |
| Train | 65.90501426 | 0.030987115 |
| Train | 50.43797683 | 0.000278593 |
| Train | 55.98433872 | 0.001524204 |
| Train | 83.14384552 | 0.86334613 |
| Train | 57.173471 | 0.00219336 |
| Train | 76.02244817 | 0.415730985 |
| Train | 60.31572564 | 0.005728296 |
| Train | 55.77834613 | 0.001431039 |
| Train | 55.64008424 | 0.001371718 |
| Train | 58.76899817 | 0.003572622 |
| Train | 50.05761357 | 0.000247931 |
| Train | 74.54497779 | 0.311445395 |
| Train | 40.35747297 | 1.26665E-05 |
| Train | 38.36499454 | 6.87571E-06 |
| Train | 40.20239029 | 1.20782E-05 |
| Train | 47.28843581 | 0.000106076 |
| Train | 76.32719679 | 0.438592658 |
| Train | 45.56528701 | 6.25408E-05 |
| Train | 63.5373398 | 0.015236242 |
| Train | 59.2241782 | 0.004105551 |
| Train | 58.25154021 | 0.003050032 |
| Train | 70.1266706 | 0.10450055 |
| Train | 49.24512518 | 0.000193265 |
| Train | 47.79751749 | 0.000123995 |
| Train | 51.42784071 | 0.000377354 |
| Train | 49.79417433 | 0.000228695 |
| Train | 56.80992639 | 0.001962442 |
| Train | 45.84623867 | 6.81672E-05 |
| Train | 54.907345 | 0.001095986 |
| Train | 51.41745884 | 0.000376155 |
| Train | 65.62767177 | 0.028532877 |
| Train | 69.3723513 | 0.084750009 |
| Train | 44.63442037 | 4.70117E-05 |
| Train | 53.51314897 | 0.000714997 |
| Train | 54.51470255 | 0.000971786 |
| Train | 71.82526665 | 0.164195583 |
| Train | 48.67000948 | 0.000162024 |
| Train | 72.39164395 | 0.189438343 |
| Train | 80.24000458 | 0.721705561 |
| Train | 58.61925886 | 0.003412838 |
| Train | 52.63193301 | 0.00054579 |
| Train | 53.48322923 | 0.000708472 |
| Train | 54.06675641 | 0.000847171 |
| Train | 50.62212403 | 0.000294772 |
| Train | 50.11005196 | 0.000251949 |
| Train | 74.2482301 | 0.292273994 |
| Train | 60.61533047 | 0.006276031 |
| Train | 75.454229 | 0.37412505 |
| Train | 41.03661769 | 1.5599E-05 |
| Train | 38.93355601 | 8.18527E-06 |
| Train | 75.02247465 | 0.34367661 |
| Train | 46.94533457 | 9.54842E-05 |
| Train | 61.17093399 | 0.007433085 |
| Train | 50.44615013 | 0.000279292 |
| Train | 47.57879215 | 0.000115953 |
| Train | 64.0783625 | 0.017936351 |
| Train | 50.80044987 | 0.000311334 |
| Train | 61.945037 | 0.009405743 |
| Train | 49.8823296 | 0.00023496 |
| Train | 45.13485343 | 5.48082E-05 |
| Train | 58.73770613 | 0.003538626 |
| Train | 43.24321039 | 3.06863E-05 |
| Train | 62.80255947 | 0.012200104 |
| Train | 50.08089735 | 0.000249707 |
| Train | 62.97959052 | 0.012871925 |
| Train | 52.18883416 | 0.000476483 |
| Train | 65.7031385 | 0.029181351 |
| Train | 60.72228502 | 0.006483915 |
| Train | 45.81985191 | 6.76179E-05 |
| Train | 47.89066045 | 0.000127587 |
| Train | 50.42801509 | 0.000277744 |
| Train | 60.24640023 | 0.005608489 |
| Train | 76.17657533 | 0.427254417 |
| Train | 44.11843853 | 4.01324E-05 |
| Train | 44.37195354 | 4.33765E-05 |
| Train | 51.39384632 | 0.000373442 |
| Train | 77.01087909 | 0.490692842 |
| Train | 48.90209804 | 0.000173973 |
| Train | 76.24292285 | 0.432240092 |
| Train | 53.5617552 | 0.000725726 |
| Train | 71.57548528 | 0.153952873 |
| Train | 50.70932742 | 0.000302758 |
| Train | 60.3849125 | 0.005850405 |
| Train | 75.57618582 | 0.382922039 |
| Train | 44.51813472 | 4.5365E-05 |
| Train | 46.6794901 | 8.801E-05 |
| Train | 54.0725967 | 0.000848689 |
| Train | 58.89284788 | 0.003710395 |
| Train | 61.31062926 | 0.00775588 |
| Train | 73.39314722 | 0.24111706 |
| Train | 55.51461925 | 0.001320015 |
| Train | 55.00485963 | 0.001129215 |
| Train | 47.64051408 | 0.000118168 |
| Train | 52.52781028 | 0.000528648 |
| Train | 54.2158399 | 0.000886763 |
| Train | 44.1148279 | 4.0088E-05 |
| Train | 83.09455021 | 0.861552913 |
| Train | 61.07395173 | 0.007216866 |
| Train | 50.00136633 | 0.000243692 |
| Train | 63.49182049 | 0.015028232 |
| Train | 77.17045855 | 0.502924922 |
| Train | 51.5645426 | 0.000393501 |
| Train | 74.84979204 | 0.331833599 |
| Train | 40.78902407 | 1.44586E-05 |
| Train | 54.33035528 | 0.000918426 |
| Train | 54.79066103 | 0.001057506 |
| Train | 52.05464178 | 0.000457283 |
| Train | 73.7451808 | 0.261416767 |
| Train | 41.1893646 | 1.6347E-05 |
| Train | 56.81383866 | 0.001964792 |
| Train | 72.78393591 | 0.20860209 |
| Train | 57.01195319 | 0.002087596 |
| Train | 75.34961178 | 0.366644305 |
| Train | 82.97783824 | 0.857228576 |
| Train | 58.59882158 | 0.00339159 |
| Train | 49.9001828 | 0.000236249 |
| Train | 73.78092902 | 0.263538628 |
| Train | 56.166204 | 0.001611478 |
| Train | 46.77647765 | 9.06665E-05 |
| Train | 69.42114118 | 0.085917674 |
| Train | 41.98329154 | 2.08528E-05 |
| Train | 42.91923099 | 2.77844E-05 |
| Train | 40.39051717 | 1.27955E-05 |
| Train | 96.351115 | 0.997249468 |
| Train | 72.96512795 | 0.217922894 |
| Train | 62.27810755 | 0.010406616 |
| Train | 61.81518688 | 0.009041916 |
| Train | 39.42783694 | 9.52481E-06 |
| Train | 52.90079938 | 0.000592666 |
| Train | 70.44563358 | 0.114013656 |
| Train | 53.68987263 | 0.000754782 |
| Train | 46.69248864 | 8.83614E-05 |
| Train | 70.25403742 | 0.108212257 |
| Train | 52.1910146 | 0.000476802 |
| Train | 46.82405948 | 9.19989E-05 |
| Train | 91.0913231 | 0.986351158 |
| Train | 50.31472124 | 0.000268263 |
| Train | 49.57554905 | 0.000213869 |
| Train | 68.62565251 | 0.068596075 |
| Train | 65.52420144 | 0.027666441 |
| Train | 62.67079951 | 0.011722673 |
| Train | 73.66935671 | 0.256952407 |
| Train | 53.35269065 | 0.000680692 |
| Train | 58.59547562 | 0.003388124 |
| Train | 54.56705542 | 0.000987497 |
| Train | 78.36568048 | 0.593438793 |
| Train | 68.38626569 | 0.064052114 |
| Train | 50.10491494 | 0.000251552 |
| Train | 62.20115039 | 0.010166384 |
| Train | 58.82696085 | 0.003636454 |
| Train | 56.53642012 | 0.001804855 |
| Train | 65.39350186 | 0.026608499 |
| Train | 76.03518228 | 0.41667974 |
| Train | 54.96530585 | 0.001115617 |
| Train | 62.86802205 | 0.012444397 |
| Train | 64.36469032 | 0.019550163 |
| Train | 70.46642222 | 0.114659171 |
| Train | 52.21849446 | 0.000480835 |
| Train | 67.74354272 | 0.053204235 |
| Train | 58.18261698 | 0.002986438 |
| Train | 48.49571147 | 0.000153593 |
| Train | 88.589299 | 0.971059451 |
| Train | 37.15442321 | 4.74358E-06 |
| Train | 50.37121432 | 0.000272949 |
| Train | 51.9052986 | 0.000436824 |
| Train | 84.12472703 | 0.895119802 |
| Train | 49.3417423 | 0.000199076 |
| Train | 59.86091468 | 0.004986341 |
| Train | 67.78920402 | 0.053913958 |
| Train | 68.30920036 | 0.062649958 |
| Train | 65.83057927 | 0.030309039 |
| Train | 58.78642235 | 0.003591692 |
| Train | 49.65481005 | 0.00021913 |
| Train | 57.41787059 | 0.002363647 |
| Train | 46.18423875 | 7.56109E-05 |
| Train | 73.32391983 | 0.237254157 |
| Train | 55.82576358 | 0.001451968 |
| Train | 50.21739655 | 0.000260377 |
| Train | 28.76043953 | 3.61637E-07 |
| Train | 46.07346411 | 7.30859E-05 |
| Train | 82.65703736 | 0.844761329 |
| Train | 48.58589844 | 0.000157899 |
| Train | 60.13260685 | 0.005417206 |
| Train | 62.94702644 | 0.012745661 |
| Train | 71.74383238 | 0.160797394 |
| Train | 42.4317721 | 2.39269E-05 |
| Train | 67.90021679 | 0.055676907 |
| Train | 52.01131026 | 0.00045125 |
| Train | 55.95563023 | 0.001510865 |
| Train | 49.39314383 | 0.000202238 |
| Train | 62.21172132 | 0.010199053 |
| Train | 49.12257021 | 0.000186139 |
| Train | 75.70575844 | 0.392353036 |
| Train | 62.2433215 | 0.010297339 |
| Train | 71.864064 | 0.165834745 |
| Train | 68.18649576 | 0.060476411 |
| Train | 44.32013471 | 4.26927E-05 |
| Train | 69.4451996 | 0.086498862 |
| Train | 59.78934153 | 0.004878627 |
| Train | 58.48880443 | 0.003279451 |
| Train | 53.86019668 | 0.000795218 |
| Train | 56.55425278 | 0.001814732 |
| Train | 49.5495655 | 0.000212172 |
| Train | 48.20787743 | 0.00014062 |
| Train | 79.95536717 | 0.703841221 |
| Train | 57.57576027 | 0.002480608 |
| Train | 72.52291171 | 0.195696441 |
| Train | 47.68039816 | 0.000119622 |
| Train | 56.99447391 | 0.00207646 |
| Train | 39.42466508 | 9.51555E-06 |
| Train | 44.44241367 | 4.43238E-05 |
| Train | 55.55122909 | 0.001334898 |
| Train | 78.35424016 | 0.592592183 |
| Train | 53.22164244 | 0.000653899 |
| Train | 59.30764884 | 0.004211542 |
| Train | 68.08472927 | 0.058727472 |
| Train | 60.69183484 | 0.006424042 |
| Train | 81.3452572 | 0.78446005 |
| Train | 42.4799575 | 2.42831E-05 |
| Train | 65.07419298 | 0.024186708 |
| Train | 58.21874039 | 0.003019601 |
| Train | 55.97187789 | 0.0015184 |
| Train | 74.15281587 | 0.286259187 |
| Train | 83.22807204 | 0.866364627 |
| Train | 53.99261537 | 0.000828144 |
| Train | 56.39304621 | 0.00172736 |
| Train | 39.98457012 | 1.12979E-05 |
| Train | 61.82328112 | 0.009064182 |
| Train | 39.11342299 | 8.6494E-06 |
| Train | 62.2009184 | 0.010165666 |
| Train | 51.66782263 | 0.000406158 |
| Train | 68.15609842 | 0.059948983 |
| Train | 69.18463468 | 0.080390531 |
| Train | 67.28425268 | 0.04654021 |
| Train | 58.24115333 | 0.003040362 |
| Train | 60.18405623 | 0.005502873 |
| Train | 56.22408526 | 0.001640287 |
| Train | 49.05176692 | 0.000182142 |
| Train | 65.76072362 | 0.029685794 |
| Train | 49.8666218 | 0.000233831 |
| Train | 61.72757213 | 0.008804343 |
| Train | 76.68604493 | 0.465843414 |
| Train | 93.64870652 | 0.993722884 |
| Train | 48.10548709 | 0.000136274 |
| Train | 51.14867026 | 0.000346405 |
| Train | 53.30152534 | 0.000670103 |
| Train | 50.48022308 | 0.000282224 |
| Train | 51.70369532 | 0.000410648 |
| Train | 47.48121676 | 0.000112535 |
| Train | 51.97737201 | 0.000446581 |
| Train | 62.19992699 | 0.010162611 |
| Train | 62.3389456 | 0.010600495 |
| Train | 68.58871699 | 0.067875991 |
| Train | 62.06566957 | 0.009756729 |
| Train | 75.2523967 | 0.359749907 |
| Train | 46.32598807 | 7.89695E-05 |
| Train | 62.69444569 | 0.011806977 |
| Train | 54.03672425 | 0.000839412 |
| Train | 56.4596648 | 0.001762946 |
| Train | 59.76491865 | 0.004842403 |
| Train | 48.84272797 | 0.000170835 |
| Train | 80.41680667 | 0.732462372 |
| Train | 48.72557371 | 0.000164808 |
| Train | 61.60868619 | 0.008491836 |
| Train | 66.40090399 | 0.035893383 |
| Train | 51.00105404 | 0.00033108 |
| Train | 72.20443654 | 0.180780496 |
| Train | 72.40049822 | 0.189855608 |
| Train | 76.7803235 | 0.473043552 |
| Train | 49.9384801 | 0.000239039 |
| Train | 64.09205828 | 0.018010475 |
| Train | 62.34095229 | 0.010606957 |
| Train | 55.69822107 | 0.001396356 |
| Train | 72.62988819 | 0.200911174 |
| Train | 44.35430055 | 4.31423E-05 |
| Train | 44.68194872 | 4.77018E-05 |
| Train | 68.67346282 | 0.06953872 |
| Train | 64.45971148 | 0.020116555 |
| Train | 50.42160448 | 0.000277198 |
| Train | 59.28202842 | 0.004178722 |
| Train | 50.90797 | 0.000321767 |
| Train | 70.11681461 | 0.104218065 |
| Train | 55.04906889 | 0.00114461 |
| Train | 52.51957331 | 0.000527315 |
| Train | 65.56333625 | 0.027991103 |
| Train | 57.61423764 | 0.002509975 |
| Train | 68.23949154 | 0.061406373 |
| Train | 62.86614499 | 0.012437324 |
| Train | 59.65382147 | 0.004680976 |
| Train | 54.08718926 | 0.000852491 |
| Train | 54.02875517 | 0.000837365 |
| Train | 52.68757526 | 0.000555177 |
| Train | 41.55903993 | 1.83091E-05 |
| Train | 47.43406203 | 0.00011092 |
| Train | 50.75372802 | 0.000306907 |
| Train | 57.6573729 | 0.00254331 |
| Train | 47.7929846 | 0.000123823 |
| Train | 73.63738914 | 0.255085325 |
| Train | 45.56195436 | 6.24769E-05 |
| Train | 46.90017188 | 9.41711E-05 |
| Train | 50.35551801 | 0.000271639 |
| Train | 60.42147512 | 0.005915973 |
| Train | 60.01577768 | 0.00522757 |
| Train | 47.05327325 | 9.86971E-05 |
| Train | 52.05144054 | 0.000456835 |
| Train | 81.06970082 | 0.769830382 |
| Train | 80.91193307 | 0.761146675 |
| Train | 75.05646333 | 0.346031318 |
| Train | 60.33062744 | 0.005754381 |
| Train | 56.38614413 | 0.001723713 |
| Train | 53.35004817 | 0.000680141 |
| Train | 45.93100294 | 6.99621E-05 |
| Train | 61.56383527 | 0.00837682 |
| Train | 47.18900214 | 0.000102891 |
| Train | 76.89616597 | 0.481905778 |
| Train | 46.87863072 | 9.35512E-05 |
| Train | 53.02444656 | 0.000615555 |
| Train | 55.17624236 | 0.001190073 |
| Train | 42.52623729 | 2.46301E-05 |
| Train | 59.20687842 | 0.004083919 |
| Train | 77.67136296 | 0.541230114 |
| Train | 52.16566923 | 0.000473112 |
| Train | 62.06338252 | 0.009749953 |
| Train | 60.74015768 | 0.006519316 |
| Train | 78.52962592 | 0.605508574 |
| Train | 48.09694836 | 0.000135917 |
| Train | 51.53906039 | 0.00039044 |
| Train | 47.75203033 | 0.000122278 |
| Train | 60.58099494 | 0.006210706 |
| Train | 81.90006852 | 0.8118346 |
| Train | 59.85429348 | 0.004976277 |
| Train | 69.0891464 | 0.078252302 |
| Train | 87.56110581 | 0.960753713 |
| Train | 62.91885938 | 0.012637433 |
| Train | 52.00401607 | 0.000450243 |
| Train | 66.14258849 | 0.033250882 |
| Train | 42.32708764 | 2.31711E-05 |
| Train | 50.12463517 | 0.000253077 |
| Train | 38.20438043 | 6.54529E-06 |
| Train | 55.09745048 | 0.001161697 |
| Train | 52.8449283 | 0.000582605 |
| Train | 69.30693506 | 0.083206947 |
| Train | 46.24981871 | 7.71466E-05 |
| Train | 46.37473625 | 8.01587E-05 |
| Train | 75.64787303 | 0.388129407 |
| Train | 58.93871986 | 0.003762757 |
| Train | 59.7374329 | 0.004801957 |
| Train | 57.30884001 | 0.002286108 |
| Train | 54.06428797 | 0.000846531 |
| Train | 62.55127029 | 0.011305564 |
| Train | 45.69468557 | 6.5072E-05 |
| Train | 75.52615919 | 0.37930389 |
| Train | 46.68516307 | 8.81632E-05 |
| Train | 60.36525762 | 0.005815455 |
| Train | 73.9742879 | 0.275206378 |
| Train | 69.83544145 | 0.096433951 |
| Train | 58.74886834 | 0.003550715 |
| Train | 49.08096709 | 0.00018378 |
| Train | 42.91697689 | 2.77652E-05 |
| Train | 61.52375311 | 0.008275339 |
| Train | 61.89237121 | 0.009256466 |
| Train | 63.00721047 | 0.01297998 |
| Train | 46.46307752 | 8.23596E-05 |
| Train | 42.93152685 | 2.78893E-05 |
| Train | 65.65332344 | 0.028751719 |
| Train | 71.09367301 | 0.135676928 |
| Train | 38.91093493 | 8.12869E-06 |
| Train | 63.73545455 | 0.01617509 |
| Train | 50.96078344 | 0.000327018 |
| Train | 59.54701758 | 0.004530839 |
| Train | 70.60434126 | 0.119022686 |
| Train | 60.24989917 | 0.005614475 |
| Train | 70.92072377 | 0.129577125 |
| Train | 59.5524725 | 0.004538392 |
| Train | 60.60251627 | 0.006251571 |
| Train | 80.16199561 | 0.716875868 |
| Train | 59.78175662 | 0.004867348 |
| Train | 78.47541446 | 0.601530996 |
| Train | 57.29310222 | 0.002275127 |
| Train | 53.00808922 | 0.000612477 |
| Train | 61.49943525 | 0.008214367 |
| Train | 43.26818907 | 3.09222E-05 |
| Train | 48.0898564 | 0.000135622 |
| Train | 57.3544344 | 0.00231822 |
| Train | 50.56669524 | 0.000289806 |
| Train | 52.7646493 | 0.000568446 |
| Train | 54.5717603 | 0.000988921 |
| Train | 60.10224944 | 0.005367283 |
| Train | 39.24926565 | 9.01729E-06 |
| Train | 44.354445 | 4.31442E-05 |
| Train | 40.58657943 | 1.35883E-05 |
| Train | 83.0892316 | 0.861358257 |
| Train | 55.63210387 | 0.00136837 |
| Train | 58.49849687 | 0.00328918 |
| Train | 60.41736825 | 0.005908574 |
| Train | 52.9121193 | 0.000594726 |
| Train | 71.66238534 | 0.157455745 |
| Train | 47.28604847 | 0.000105999 |
| Train | 50.41708973 | 0.000276815 |
| Train | 42.98286956 | 2.83319E-05 |
| Train | 59.37204358 | 0.004295167 |
| Train | 57.53873286 | 0.002452671 |
| Train | 56.03087828 | 0.001546078 |
| Train | 71.81997077 | 0.163972871 |
| Train | 73.4729219 | 0.245621362 |
| Train | 50.96908231 | 0.000327851 |
| Train | 49.09483334 | 0.000184563 |
| Train | 76.00311927 | 0.414292036 |
| Train | 74.95542595 | 0.339054101 |
| Train | 58.07609568 | 0.002890744 |
| Train | 63.01724362 | 0.013019458 |
| Train | 63.35557376 | 0.014422182 |
| Train | 53.94752375 | 0.000816782 |
| Train | 78.52584334 | 0.605231499 |
| Train | 79.09059424 | 0.645767352 |
| Train | 57.60987771 | 0.002506629 |
| Train | 75.49605045 | 0.377132664 |
| Train | 55.35012404 | 0.001255166 |
| Train | 100.1336645 | 0.999136005 |
| Train | 57.20002981 | 0.002211256 |
| Train | 55.30793139 | 0.001239051 |
| Train | 67.61564965 | 0.051263018 |
| Train | 43.74524187 | 3.5793E-05 |
| Train | 43.551528 | 3.37289E-05 |
| Train | 63.83397835 | 0.016662952 |
| Train | 46.04638865 | 7.24816E-05 |
| Train | 60.43942467 | 0.005948432 |
| Train | 60.0438603 | 0.005272542 |
| Train | 67.7864644 | 0.053871125 |
| Train | 77.88467118 | 0.557421598 |
| Train | 61.10549848 | 0.007286504 |
| Train | 57.16853808 | 0.002190052 |
| Train | 68.45581174 | 0.065342526 |
| Train | 66.74090342 | 0.039681029 |
| Train | 42.79191456 | 2.67206E-05 |
| Train | 54.63623454 | 0.001008646 |
| Train | 57.55255092 | 0.00246306 |
| Train | 69.81252735 | 0.09582342 |
| Train | 52.80816669 | 0.000576078 |
| Train | 43.71274962 | 3.54382E-05 |
| Train | 50.14549197 | 0.000254701 |
| Train | 70.77195402 | 0.124518334 |
| Train | 49.82088975 | 0.000230575 |
| Train | 79.65925346 | 0.684570765 |
| Train | 61.27707522 | 0.007677102 |
| Train | 87.60335701 | 0.961239328 |
| Train | 52.97386843 | 0.000606087 |
| Train | 80.29221147 | 0.724909383 |
| Train | 62.30064811 | 0.010478036 |
| Train | 41.36488669 | 1.72509E-05 |
| Train | 69.29730746 | 0.082982026 |
| Train | 51.18432349 | 0.000350212 |
| Train | 52.53916885 | 0.000530492 |
| Train | 56.70971317 | 0.001903168 |
| Train | 79.12432422 | 0.648129616 |
| Train | 52.77992303 | 0.000571113 |
| Train | 45.00176981 | 5.26167E-05 |
| Train | 57.26600443 | 0.002256344 |
| Train | 53.78242144 | 0.000776492 |
| Train | 43.22636345 | 3.05282E-05 |
| Train | 76.30797232 | 0.437141674 |
| Train | 39.51523287 | 9.78351E-06 |
| Train | 46.96523389 | 9.60685E-05 |
| Train | 58.98984063 | 0.003821978 |
| Train | 72.0106381 | 0.172145938 |
| Train | 55.39592247 | 0.001272895 |
| Train | 64.59452443 | 0.020947783 |
| Train | 56.84761282 | 0.001985206 |
| Train | 58.01184459 | 0.002834508 |
| Train | 56.6679788 | 0.001879013 |
| Train | 42.60732173 | 2.52502E-05 |
| Train | 54.46406204 | 0.000956826 |
| Train | 53.45655 | 0.000702704 |
| Train | 70.93097525 | 0.129932107 |
| Train | 80.215904 | 0.720218884 |
| Train | 57.10984261 | 0.002151072 |
| Train | 47.1685825 | 0.000102249 |
| Train | 42.03270651 | 2.11711E-05 |
| Train | 40.47531733 | 1.31325E-05 |
| Train | 50.32740394 | 0.000269308 |
| Train | 47.09688187 | 0.000100026 |
| Train | 78.67453786 | 0.616071561 |
| Train | 47.10319065 | 0.000100219 |
| Train | 58.5666848 | 0.003358444 |
| Train | 46.89974849 | 9.41589E-05 |
| Train | 63.78584731 | 0.016422843 |
| Train | 48.92707409 | 0.00017531 |
| Train | 49.81553613 | 0.000230197 |
| Train | 48.32047907 | 0.000145559 |
| Train | 44.53405196 | 4.55869E-05 |
| Train | 59.78477882 | 0.004871837 |
| Train | 73.59129255 | 0.252408751 |
| Train | 48.23836189 | 0.00014194 |
| Train | 38.77514046 | 7.79717E-06 |
| Train | 58.69809535 | 0.003496054 |
| Train | 56.30227089 | 0.001680021 |
| Train | 43.70154623 | 3.53166E-05 |
| Train | 78.40539066 | 0.596373225 |
| Train | 49.362273 | 0.000200333 |
| Train | 60.26792896 | 0.005645425 |
| Train | 40.97826313 | 1.53224E-05 |
| Train | 77.26896131 | 0.510474611 |
| Train | 71.16788891 | 0.138367857 |
| Train | 53.17416265 | 0.000644454 |
| Train | 43.37316981 | 3.19338E-05 |
| Train | 73.39938097 | 0.24146695 |
| Train | 47.00799618 | 9.73364E-05 |
| Train | 76.09880108 | 0.421428863 |
| Train | 68.62389712 | 0.068561713 |
| Train | 46.40628002 | 8.09378E-05 |
| Train | 114.9862882 | 0.999990902 |
| Train | 54.01468529 | 0.000833763 |
| Train | 70.87495299 | 0.128002371 |
| Train | 61.53893301 | 0.008313628 |
| Train | 45.43602643 | 6.01105E-05 |
| Train | 76.01424258 | 0.415119933 |
| Train | 50.33486341 | 0.000269925 |
| Train | 62.48591624 | 0.011083743 |
| Train | 52.56470884 | 0.00053466 |
| Train | 83.02999017 | 0.859174713 |
| Train | 41.27187679 | 1.67659E-05 |
| Train | 80.72383228 | 0.750503069 |
| Train | 51.08771008 | 0.000339992 |
| Train | 57.279049 | 0.002265366 |
| Train | 67.96180462 | 0.056678173 |
| Train | 50.71535252 | 0.000303318 |
| Train | 53.5391017 | 0.000720706 |
| Train | 61.13394263 | 0.007349866 |
| Train | 53.02236394 | 0.000615162 |
| Train | 43.91836169 | 3.77443E-05 |
| Train | 52.32362078 | 0.000496579 |
| Train | 48.65577385 | 0.000161318 |
| Train | 46.81133042 | 9.16405E-05 |
| Train | 63.15637969 | 0.013579239 |
| Train | 50.68579587 | 0.000300582 |
| Train | 59.16508824 | 0.004032129 |
| Train | 71.9497002 | 0.169499276 |
| Train | 67.87572461 | 0.055283349 |
| Train | 45.40128352 | 5.94736E-05 |
| Train | 79.80189573 | 0.693938455 |
| Train | 59.36964716 | 0.004292026 |
| Train | 57.50143473 | 0.002424847 |
| Train | 53.7805254 | 0.000776041 |
| Train | 59.55453758 | 0.004541252 |
| Train | 53.52086838 | 0.00071669 |
| Train | 54.92195175 | 0.001100901 |
| Train | 46.17300628 | 7.53509E-05 |
| Train | 50.37168544 | 0.000272989 |
| Train | 63.01172098 | 0.012997714 |
| Train | 58.46641047 | 0.003257081 |
| Train | 73.20030106 | 0.23046294 |
| Train | 66.19524169 | 0.033773819 |
| Train | 48.65971833 | 0.000161513 |
| Train | 38.5243108 | 7.21995E-06 |
| Train | 53.13991565 | 0.000637726 |
| Train | 87.59894559 | 0.961188898 |
| Train | 74.37995505 | 0.300698698 |
| Train | 60.23793868 | 0.005594037 |
| Train | 40.13845678 | 1.18438E-05 |
| Train | 46.92854913 | 9.4994E-05 |
| Train | 56.49310828 | 0.001781085 |
| Train | 48.45784776 | 0.00015182 |
| Train | 58.05131979 | 0.002868928 |
| Train | 46.2055139 | 7.61057E-05 |
| Train | 46.33523949 | 7.91939E-05 |
| Train | 56.58930617 | 0.001834309 |
| Train | 55.05979235 | 0.001148375 |
| Train | 51.93770763 | 0.000441185 |
| Train | 52.53908862 | 0.000530479 |
| Train | 52.15861534 | 0.000472091 |
| Train | 60.41830447 | 0.005910261 |
| Train | 42.85712969 | 2.72603E-05 |
| Train | 63.84919001 | 0.016739551 |
| Train | 49.84049909 | 0.000231966 |
| Train | 49.28209161 | 0.000195468 |
| Train | 45.32697862 | 5.81339E-05 |
| Train | 76.76170614 | 0.471621018 |
| Train | 64.86339064 | 0.022707124 |
| Train | 106.8288727 | 0.999889023 |
| Train | 55.45662115 | 0.001296777 |
| Train | 78.98527371 | 0.638345465 |
| Train | 70.1102323 | 0.104029787 |
| Train | 76.7041835 | 0.467227647 |
| Train | 63.88325356 | 0.016912345 |
| Train | 61.93387156 | 0.0093739 |
| Train | 44.38975078 | 4.36138E-05 |
| Train | 49.03279887 | 0.000181086 |
| Train | 70.75240885 | 0.123866464 |
| Train | 80.59485053 | 0.743024187 |
| Train | 48.35466567 | 0.000147093 |
| Train | 43.20102304 | 3.02919E-05 |
| Train | 55.49298345 | 0.001311298 |
| Train | 48.71771428 | 0.000164411 |
| Train | 76.90615347 | 0.482670521 |
| Train | 47.72168908 | 0.000121146 |
| Train | 48.03004356 | 0.000133158 |
| Train | 61.72831835 | 0.008806337 |
| Train | 64.13703795 | 0.018256042 |
| Train | 47.34946347 | 0.00010808 |
| Train | 64.429537 | 0.019934971 |
| Train | 51.16518418 | 0.000348163 |
| Train | 55.62133448 | 0.001363865 |
| Train | 83.4587646 | 0.874344404 |
| Train | 60.32494055 | 0.005744414 |
| Train | 44.31085123 | 4.25714E-05 |
| Train | 66.7762773 | 0.040096451 |
| Train | 50.59010352 | 0.000291893 |
| Train | 46.87466532 | 9.34375E-05 |
| Train | 61.34037705 | 0.007826401 |
| Train | 43.1652894 | 2.99618E-05 |
| Train | 55.91350239 | 0.001491503 |
| Train | 99.56299499 | 0.99897095 |
| Train | 60.59922412 | 0.006245303 |
| Train | 50.13271961 | 0.000253705 |
| Train | 63.11783481 | 0.013421825 |
| Train | 71.0289286 | 0.133365548 |
| Train | 75.23583208 | 0.358580806 |
| Train | 81.75383218 | 0.804888679 |
| Train | 52.2888408 | 0.000491314 |
| Train | 51.32899833 | 0.000366092 |
| Train | 63.92241159 | 0.017113148 |
| Train | 77.42513657 | 0.522433662 |
| Train | 45.78847657 | 6.69706E-05 |
| Train | 48.10139674 | 0.000136103 |
| Train | 45.38314055 | 5.91437E-05 |
| Train | 40.0888606 | 1.1665E-05 |
| Train | 70.10692375 | 0.103935286 |
| Train | 46.17677116 | 7.54379E-05 |
| Train | 59.92968483 | 0.005092066 |
| Train | 154.6909505 | 1 |
| Train | 55.57276286 | 0.001343729 |
| Train | 51.91812071 | 0.000438544 |
| Train | 48.86472609 | 0.000171991 |
| Train | 47.28710184 | 0.000106033 |
| Train | 61.98995973 | 0.009534961 |
| Train | 50.27353392 | 0.000264897 |
| Train | 56.5591449 | 0.001817453 |
| Train | 62.53209638 | 0.011240034 |
| Train | 79.59647498 | 0.680399291 |
| Train | 46.89927524 | 9.41452E-05 |
| Train | 43.33247538 | 3.15378E-05 |
| Train | 50.36165561 | 0.000272151 |
| Train | 40.2029026 | 1.20801E-05 |
| Train | 59.87677704 | 0.005010532 |
| Train | 46.54928105 | 8.45655E-05 |
| Train | 49.98378323 | 0.000242382 |
| Train | 47.61575172 | 0.000117274 |
| Train | 57.93752825 | 0.002770823 |
| Train | 75.3951949 | 0.369896117 |
| Train | 54.60283201 | 0.000998379 |
| Train | 74.34841996 | 0.298669293 |
| Train | 55.61957892 | 0.001363132 |
| Train | 52.45858132 | 0.00051755 |
| Train | 50.10030928 | 0.000251197 |
| Train | 56.46375907 | 0.001765156 |
| Train | 79.33082003 | 0.662431319 |
| Train | 50.19780835 | 0.000258819 |
| Train | 60.51454349 | 0.006086197 |
| Train | 66.45110047 | 0.036429854 |
| Train | 62.13498087 | 0.009964221 |
| Train | 66.24423236 | 0.034267473 |
| Train | 59.04373959 | 0.003885423 |
| Train | 50.24806377 | 0.000262837 |
| Train | 81.94446759 | 0.813905516 |
| Train | 53.22772398 | 0.000655119 |
| Train | 46.69551035 | 8.84433E-05 |
| Train | 47.78569643 | 0.000123547 |
| Train | 53.76083154 | 0.000771372 |
| Train | 56.19146846 | 0.00162399 |
| Train | 44.12465043 | 4.02089E-05 |
| Train | 71.2040877 | 0.139696513 |
| Train | 50.20221155 | 0.000259168 |
| Train | 53.35100781 | 0.000680341 |
| Train | 50.08947022 | 0.000250364 |
| Train | 46.34328668 | 7.93895E-05 |
| Train | 60.57209795 | 0.00619389 |
| Train | 72.06789458 | 0.174662449 |
| Train | 57.85157539 | 0.002698942 |
| Train | 60.60359962 | 0.006253637 |
| Train | 40.93801195 | 1.51344E-05 |
| Train | 63.4037301 | 0.014633587 |
| Train | 63.82419963 | 0.016613888 |
| Train | 49.98462575 | 0.000242445 |
| Train | 83.37565026 | 0.871517625 |
| Train | 59.48218189 | 0.004442049 |
| Train | 56.60134754 | 0.001841082 |
| Train | 63.74715778 | 0.016232299 |
| Train | 55.43883094 | 0.001289731 |
| Train | 80.53875018 | 0.739725892 |
| Train | 70.64194858 | 0.120237193 |
| Train | 58.06206374 | 0.002878369 |
| Train | 62.11103565 | 0.009892048 |
| Train | 39.49428505 | 9.72087E-06 |
| Train | 54.86291844 | 0.001081173 |
| Train | 42.35258161 | 2.33529E-05 |
| Train | 48.36761922 | 0.000147678 |
| Train | 54.99839784 | 0.001126982 |
| Train | 60.77585303 | 0.006590594 |
| Train | 46.95209987 | 9.56824E-05 |
| Train | 54.80055047 | 0.001060714 |
| Train | 56.34264444 | 0.001700914 |
| Train | 55.54732716 | 0.001333303 |
| Train | 71.13381126 | 0.137126733 |
| Train | 61.69427634 | 0.008715687 |
| Train | 82.54505015 | 0.840204553 |
| Train | 41.3564362 | 1.72063E-05 |
| Train | 77.83855034 | 0.553929847 |
| Train | 55.1827028 | 0.00119243 |
| Train | 48.13206128 | 0.000137389 |
| Train | 49.38155004 | 0.00020152 |
| Train | 44.9602976 | 5.19519E-05 |
| Train | 71.60768471 | 0.155243339 |
| Train | 49.49913815 | 0.000208917 |
| Train | 54.43244813 | 0.000947605 |
| Train | 47.82326425 | 0.000124978 |
| Train | 75.48697299 | 0.376479089 |
| Train | 84.40435693 | 0.90290116 |
| Train | 43.3410104 | 3.16204E-05 |
| Train | 68.61207919 | 0.068330638 |
| Train | 55.0933508 | 0.00116024 |
| Train | 40.71875168 | 1.41503E-05 |
| Train | 48.37083045 | 0.000147823 |
| Train | 52.32427137 | 0.000496678 |
| Train | 56.00933168 | 0.001535912 |
| Train | 43.94494646 | 3.80533E-05 |
| Train | 42.65131119 | 2.55931E-05 |
| Train | 40.07637027 | 1.16204E-05 |
| Train | 47.11470903 | 0.000100574 |
| Train | 64.78029568 | 0.022148506 |
| Train | 65.46254374 | 0.02716236 |
| Train | 52.07400224 | 0.000460005 |
| Train | 74.31662197 | 0.296630829 |
| Train | 52.08323285 | 0.000461308 |
| Train | 59.95857114 | 0.005137137 |
| Train | 59.84137238 | 0.004956698 |
| Train | 49.8380971 | 0.000231795 |
| Train | 46.7121046 | 8.88945E-05 |
| Train | 53.86692711 | 0.000796859 |
| Train | 59.22929371 | 0.004111969 |
| Train | 60.12190196 | 0.005399549 |
| Train | 46.50215678 | 8.33524E-05 |
| Train | 70.74283419 | 0.123548192 |
| Train | 56.51837479 | 0.001794913 |
| Train | 57.53557018 | 0.002450299 |
| Train | 54.96802739 | 0.001116548 |
| Train | 64.69854376 | 0.021612034 |
| Train | 76.6116199 | 0.460169301 |
| Train | 80.42428332 | 0.732911347 |
| Train | 56.54241105 | 0.001808167 |
| Train | 68.37441037 | 0.063834531 |
| Train | 45.76807427 | 6.65529E-05 |
| Train | 56.78589532 | 0.001948062 |
| Train | 55.02546176 | 0.001136363 |
| Train | 73.907849 | 0.271161314 |
| Train | 46.35651689 | 7.97122E-05 |
| Train | 60.23086732 | 0.005581987 |
| Train | 70.00430285 | 0.101040933 |
| Train | 56.12541603 | 0.001591481 |
| Train | 65.64791685 | 0.028705456 |
| Train | 83.31074122 | 0.869272346 |
| Train | 46.49276081 | 8.31126E-05 |
| Train | 42.73586013 | 2.62653E-05 |
| Train | 46.70319775 | 8.8652E-05 |
| Train | 54.05375081 | 0.000843803 |
| Train | 66.44647809 | 0.036380131 |
| Train | 71.41244976 | 0.147553305 |
| Train | 63.44310229 | 0.014808694 |
| Train | 75.69339008 | 0.391449134 |
| Train | 62.88337557 | 0.012502387 |
| Train | 56.34124085 | 0.001700183 |
| Train | 43.44329744 | 3.26279E-05 |
| Train | 59.61894995 | 0.00463142 |
| Train | 43.92810763 | 3.78573E-05 |
| Train | 56.06022202 | 0.00156003 |
| Train | 65.97719119 | 0.031658604 |
| Train | 63.06887356 | 0.013224467 |
| Train | 57.41103736 | 0.002358712 |
| Train | 85.92191362 | 0.936744204 |
| Train | 53.32305929 | 0.00067454 |
| Train | 45.83777425 | 6.79905E-05 |
| Train | 46.71595083 | 8.89994E-05 |
| Train | 54.71147471 | 0.001032164 |
| Train | 47.14878469 | 0.00010163 |
| Train | 67.27309392 | 0.046388614 |
| Train | 77.12072892 | 0.499112723 |
| Train | 47.64446536 | 0.000118311 |
| Train | 41.84613723 | 1.9994E-05 |
| Train | 52.32726299 | 0.000497134 |
| Train | 57.26679357 | 0.002256888 |
| Train | 52.41468825 | 0.000510634 |
| Train | 65.76010437 | 0.029680313 |
| Train | 71.10977505 | 0.13625702 |
| Train | 44.73755787 | 4.85222E-05 |
| Train | 45.75958269 | 6.63799E-05 |
| Train | 64.23681748 | 0.018812564 |
| Train | 48.8366133 | 0.000170515 |
| Train | 42.92467144 | 2.78308E-05 |
| Train | 69.99167794 | 0.100689882 |
| Train | 51.73031664 | 0.000414013 |
| Train | 58.40522752 | 0.003196738 |
| Train | 46.65396694 | 8.73239E-05 |
| Train | 70.39108464 | 0.11233487 |
| Train | 60.75820884 | 0.006555262 |
| Train | 62.64304175 | 0.011624475 |
| Train | 53.75148173 | 0.000769165 |
| Train | 62.01510867 | 0.009608069 |
| Train | 52.84938736 | 0.000583402 |
| Train | 63.85482406 | 0.016768014 |
| Train | 51.16927494 | 0.0003486 |
| Train | 67.54696732 | 0.050248344 |
| Train | 65.43375471 | 0.026930055 |
| Train | 69.70448206 | 0.09299112 |
| Train | 97.83406061 | 0.998252699 |
| Train | 60.99981493 | 0.007055797 |
| Train | 45.68682357 | 6.49154E-05 |
| Train | 64.17492991 | 0.018465455 |
| Train | 50.03267425 | 0.000246042 |
| Train | 65.53495256 | 0.027755274 |
| Train | 42.45090546 | 2.40677E-05 |
| Train | 42.32011722 | 2.31216E-05 |
| Train | 40.35979265 | 1.26755E-05 |
| Train | 58.96326462 | 0.003791075 |
| Train | 40.30701897 | 1.2472E-05 |
| Train | 74.7821423 | 0.327250477 |
| Train | 67.55678888 | 0.050392264 |
| Train | 54.92592116 | 0.00110224 |
| Train | 50.38909252 | 0.000274449 |
| Train | 57.15820655 | 0.00218314 |
| Train | 48.93618793 | 0.000175801 |
| Train | 71.44746788 | 0.148909063 |
| Train | 70.16831272 | 0.105701529 |
| Train | 48.86349336 | 0.000171926 |
| Train | 44.90832342 | 5.11305E-05 |
| Train | 46.5872763 | 8.55564E-05 |
| Train | 74.15315535 | 0.286280378 |
| Train | 48.53164838 | 0.000155295 |
| Train | 66.95698105 | 0.042284332 |
| Train | 49.97644708 | 0.000241838 |
| Train | 57.30928553 | 0.002286419 |
| Train | 70.45360304 | 0.114260803 |
| Train | 61.22429704 | 0.007554789 |
| Train | 59.43467822 | 0.004378094 |
| Train | 40.25395829 | 1.22707E-05 |
| Train | 69.62774566 | 0.091025399 |
| Train | 66.64269586 | 0.038549262 |
| Train | 48.82035711 | 0.000169667 |
| Train | 67.38295988 | 0.047901876 |
| Train | 55.9940676 | 0.001528751 |
| Train | 72.4949423 | 0.194350023 |
| Train | 51.94168818 | 0.000441723 |
| Train | 49.11289495 | 0.000185587 |
| Train | 62.87161906 | 0.012457959 |
| Train | 45.43767916 | 6.0141E-05 |
| Train | 82.89853412 | 0.854226485 |
| Train | 61.13105859 | 0.007343417 |
| Train | 42.01868917 | 2.10803E-05 |
| Train | 50.37575596 | 0.00027333 |
| Train | 74.25034678 | 0.292408351 |
| Train | 50.08920297 | 0.000250343 |
| Train | 71.87886363 | 0.166463521 |
| Train | 62.0229235 | 0.009630894 |
| Train | 59.15383786 | 0.004018298 |
| Train | 46.21564317 | 7.63424E-05 |
| Train | 54.32787772 | 0.000917729 |
| Train | 57.96585949 | 0.002794932 |
| Train | 65.99163271 | 0.031794645 |
| Train | 41.73299329 | 1.93122E-05 |
| Train | 52.05794853 | 0.000457747 |
| Train | 73.40938003 | 0.242028971 |
| Train | 66.60658018 | 0.038140921 |
| Train | 44.62171091 | 4.68288E-05 |
| Train | 52.91372784 | 0.000595019 |
| Train | 66.94438108 | 0.04212814 |
| Train | 48.47582147 | 0.000152659 |
| Train | 95.52764408 | 0.996462178 |
| Train | 46.32735544 | 7.90026E-05 |
| Train | 62.20128416 | 0.010166798 |
| Train | 66.63253196 | 0.038433914 |
| Train | 53.66540983 | 0.000749145 |
| Train | 60.08310814 | 0.005336038 |
| Train | 58.3113591 | 0.003106318 |
| Train | 45.7633377 | 6.64563E-05 |
| Train | 56.35668873 | 0.001708241 |
| Train | 74.04245704 | 0.279395398 |
| Train | 46.48249954 | 8.28516E-05 |
| Train | 58.17836213 | 0.002982555 |
| Train | 50.63501507 | 0.000295939 |
| Train | 50.32499854 | 0.000269109 |
| Train | 60.52481325 | 0.006105276 |
| Train | 61.77524611 | 0.008932832 |
| Train | 59.27460656 | 0.004169261 |
| Train | 61.96473669 | 0.009462196 |
| Train | 78.77276967 | 0.623170667 |
| Train | 65.19650796 | 0.025087905 |
| Train | 62.13370191 | 0.009960353 |
| Train | 43.97335017 | 3.83861E-05 |
| Train | 80.82983588 | 0.756539807 |
| Train | 57.86496508 | 0.002710016 |
| Train | 56.44656434 | 0.00175589 |
| Train | 49.58528834 | 0.000214509 |
| Train | 74.83239154 | 0.33065164 |
| Train | 48.37764369 | 0.000148133 |
| Train | 68.74101671 | 0.070890985 |
| Train | 34.57339792 | 2.14976E-06 |
| Train | 60.75607934 | 0.006551013 |
| Train | 58.31197643 | 0.003106905 |
| Train | 80.85719281 | 0.758081605 |
| Train | 44.73637202 | 4.85045E-05 |
| Train | 43.69533679 | 3.52494E-05 |
| Train | 51.5076171 | 0.000386695 |
| Train | 134.7659952 | 0.999999979 |
| Train | 57.83749029 | 0.002687342 |
| Train | 49.10179759 | 0.000184957 |
| Train | 79.76477164 | 0.691515366 |
| Train | 55.98806752 | 0.001525945 |
| Train | 52.74269967 | 0.000564636 |
| Train | 45.74936027 | 6.61721E-05 |
| Train | 55.0870049 | 0.001157987 |
| Train | 59.63680507 | 0.004656728 |
| Train | 77.97051024 | 0.563904941 |
| Train | 62.25864836 | 0.010345345 |
| Train | 53.61128095 | 0.000736823 |
| Train | 49.52252136 | 0.00021042 |
| Train | 46.30476124 | 7.84572E-05 |
| Train | 65.39500322 | 0.026620416 |
| Train | 68.27274268 | 0.061996705 |
| Train | 74.25604238 | 0.29276988 |
| Train | 74.12158527 | 0.284306541 |
| Train | 68.96357251 | 0.075519663 |
| Train | 63.91842463 | 0.017092588 |
| Train | 57.46278554 | 0.002396347 |
| Train | 39.27045742 | 9.07608E-06 |
| Train | 65.45583905 | 0.027108083 |
| Train | 73.12959426 | 0.226640207 |
| Train | 49.18991633 | 0.000190022 |
| Train | 52.54403913 | 0.000531284 |
| Train | 68.46772973 | 0.065566086 |
| Train | 55.01291994 | 0.001132006 |
| Train | 88.82662244 | 0.973035939 |
| Train | 60.91020136 | 0.006865868 |
| Train | 58.23616384 | 0.003035729 |
| Train | 82.10767117 | 0.821366625 |
| Train | 55.94083233 | 0.001504035 |
| Train | 87.74836111 | 0.962862415 |
| Train | 53.10163677 | 0.000630289 |
| Train | 79.50556278 | 0.674307029 |
| Train | 62.17475269 | 0.010085251 |
| Train | 51.15727036 | 0.00034732 |
| Train | 69.86247651 | 0.097158711 |
| Train | 42.63457318 | 2.54621E-05 |
| Train | 75.27330234 | 0.361227733 |
| Train | 62.18820573 | 0.010126515 |
| Train | 74.62623869 | 0.316813805 |
| Train | 57.5518779 | 0.002462552 |
| Train | 63.54606588 | 0.015276448 |
| Train | 53.47741363 | 0.000707211 |
| Train | 53.92812797 | 0.000811943 |
| Train | 61.15836973 | 0.007404718 |
| Train | 43.97614811 | 3.84191E-05 |
| Train | 45.77925303 | 6.67814E-05 |
| Train | 76.38671821 | 0.443091564 |
| Train | 74.66193341 | 0.319187567 |
| Train | 77.87639281 | 0.556795265 |
| Train | 41.16909324 | 1.62457E-05 |
| Train | 60.30346037 | 0.005706917 |
| Train | 64.99620622 | 0.023628678 |
| Train | 46.00417756 | 7.15496E-05 |
| Train | 44.9773322 | 5.22239E-05 |
| Train | 50.65899654 | 0.000298123 |
| Train | 46.49356684 | 8.31332E-05 |
| Train | 50.55559846 | 0.000288822 |
| Train | 113.1939049 | 0.999984237 |
| Train | 55.01596438 | 0.001133063 |
| Train | 63.2143476 | 0.013819402 |
| Train | 71.07036956 | 0.134841155 |
| Train | 63.07176706 | 0.013236052 |
| Train | 40.17096128 | 1.19624E-05 |
| Train | 66.58600799 | 0.037910147 |
| Train | 72.02105953 | 0.172601851 |
| Train | 53.05374528 | 0.000621106 |
| Train | 47.43280745 | 0.000110877 |
| Train | 55.02501654 | 0.001136209 |
| Train | 86.46886376 | 0.945983675 |
| Train | 89.06914827 | 0.97491998 |
| Train | 49.10285599 | 0.000185017 |
| Train | 45.10980362 | 5.43888E-05 |
| Train | 61.05257645 | 0.007170055 |
| Train | 74.69375074 | 0.321311448 |
| Train | 71.27497633 | 0.14232943 |
| Train | 57.81182065 | 0.002666328 |
| Train | 79.58640832 | 0.67972765 |
| Train | 66.48448304 | 0.036790883 |
| Train | 53.29735425 | 0.000669247 |
| Train | 62.9685057 | 0.012828804 |
| Train | 51.06815309 | 0.00033796 |
| Train | 46.95809866 | 9.58586E-05 |
| Train | 61.40379121 | 0.00797885 |
| Train | 55.93419239 | 0.001500981 |
| Train | 44.68921185 | 4.78082E-05 |
| Train | 53.99529664 | 0.000828825 |
| Train | 54.24273479 | 0.0008941 |
| Train | 49.84333949 | 0.000232168 |
| Train | 56.51223033 | 0.001791541 |
| Train | 56.91327 | 0.002025497 |
| Train | 36.48393099 | 3.86203E-06 |
| Train | 55.3127838 | 0.001240894 |
| Train | 52.16461177 | 0.000472959 |
| Train | 67.35320265 | 0.047487422 |
| Train | 78.12287993 | 0.575358476 |
| Train | 71.49080933 | 0.150601206 |
| Train | 43.36387306 | 3.18429E-05 |
| Train | 45.70480052 | 6.52742E-05 |
| Train | 42.40437498 | 2.37268E-05 |
| Train | 40.37767083 | 1.27452E-05 |
| Train | 96.01179968 | 0.996948785 |
| Train | 55.94244547 | 0.001504779 |
| Train | 52.59782981 | 0.000540115 |
| Train | 53.34101452 | 0.000678261 |
| Train | 54.7658716 | 0.001049506 |
| Train | 50.91725053 | 0.000322683 |
| Train | 66.86572406 | 0.041165525 |
| Train | 45.03259355 | 5.31163E-05 |
| Train | 60.14202897 | 0.005432795 |
| Train | 70.97737628 | 0.131549064 |
| Train | 81.30481384 | 0.782355802 |
| Train | 53.08210234 | 0.000626527 |
| Train | 60.68383938 | 0.006408414 |
| Train | 62.84425143 | 0.012355137 |
| Train | 75.26312045 | 0.360507616 |
| Train | 69.1782838 | 0.080246676 |
| Train | 66.27317053 | 0.034562353 |
| Train | 50.24590843 | 0.000262663 |
| Train | 74.65802912 | 0.31892745 |
| Train | 64.1696907 | 0.018436365 |
| Train | 77.25960902 | 0.50975799 |
| Train | 42.9952967 | 2.844E-05 |
| Train | 60.66708207 | 0.006375778 |
| Train | 69.71556018 | 0.093278047 |
| Train | 57.39793536 | 0.002349277 |
| Train | 41.54248709 | 1.82164E-05 |
| Train | 55.97295564 | 0.001518901 |
| Train | 52.2353548 | 0.000483326 |
| Train | 46.0196737 | 7.18903E-05 |
| Train | 67.08502134 | 0.043903173 |
| Train | 84.28618651 | 0.899677683 |
| Train | 51.97305381 | 0.00044599 |
| Train | 56.10548288 | 0.001581798 |
| Train | 63.21771941 | 0.013833493 |
| Train | 63.42633483 | 0.014733871 |
| Train | 53.28628727 | 0.000666981 |
| Train | 55.72411839 | 0.001407473 |
| Train | 55.71786663 | 0.001404781 |
| Train | 46.30479101 | 7.84579E-05 |
| Train | 68.5542842 | 0.067211013 |
| Train | 43.69972135 | 3.52969E-05 |
| Train | 61.89645056 | 0.009267945 |
| Train | 53.94921353 | 0.000817205 |
| Train | 51.82090608 | 0.000425669 |
| Train | 61.9628052 | 0.009456644 |
| Train | 53.80263534 | 0.000781316 |
| Train | 54.34037594 | 0.000921249 |
| Train | 48.07575665 | 0.000135037 |
| Train | 64.74377032 | 0.021907233 |
| Train | 49.76888832 | 0.000226929 |
| Train | 75.4228667 | 0.371875943 |
| Train | 76.86689058 | 0.47966485 |
| Train | 61.82000471 | 0.009055163 |
| Train | 46.49177622 | 8.30875E-05 |
| Train | 75.35140997 | 0.366772371 |
| Train | 39.73027798 | 1.04504E-05 |
| Train | 50.26732651 | 0.000264394 |
| Train | 48.98221369 | 0.000178299 |
| Train | 55.07177778 | 0.001152599 |
| Train | 50.54392441 | 0.00028779 |
| Train | 81.09677696 | 0.771298473 |
| Train | 58.74574328 | 0.003547326 |
| Train | 50.42908786 | 0.000277835 |
| Train | 49.32435157 | 0.000198017 |
| Train | 45.00516354 | 5.26715E-05 |
| Train | 58.61047555 | 0.003403689 |
| Train | 60.46000019 | 0.005985857 |
| Train | 46.84099344 | 9.24778E-05 |
| Train | 74.48958081 | 0.307814271 |
| Train | 54.25907332 | 0.000898587 |
| Train | 53.76536592 | 0.000772445 |
| Train | 40.22243244 | 1.21527E-05 |
| Train | 42.58658984 | 2.50902E-05 |
| Train | 55.49492624 | 0.001312079 |
| Train | 62.08067846 | 0.009801288 |
| Train | 71.04909371 | 0.134081874 |
| Train | 58.1837465 | 0.00298747 |
| Train | 72.09858341 | 0.176023149 |
| Train | 73.79169562 | 0.264179893 |
| Train | 67.05272645 | 0.043489385 |
| Train | 70.3086089 | 0.109837666 |
| Train | 38.95654843 | 8.24318E-06 |
| Train | 47.64580718 | 0.00011836 |
| Train | 54.80464928 | 0.001062047 |
| Train | 75.72505925 | 0.393764957 |
| Train | 52.85057522 | 0.000583614 |
| Train | 57.09483721 | 0.002141217 |
| Train | 46.76099721 | 9.02371E-05 |
| Train | 58.00772261 | 0.002830938 |
| Train | 55.26088439 | 0.001221326 |
| Train | 55.99926554 | 0.001531186 |
| Train | 55.16983928 | 0.001187741 |
| Train | 50.03764882 | 0.000246418 |
| Train | 58.66257158 | 0.003458309 |
| Train | 77.03824627 | 0.492790186 |
| Train | 48.22075372 | 0.000141176 |
| Train | 65.80662101 | 0.030093866 |
| Train | 55.62888965 | 0.001367024 |
| Train | 51.74822639 | 0.000416292 |
| Train | 73.45274466 | 0.244476752 |
| Train | 48.29638233 | 0.000144488 |
| Train | 61.35312502 | 0.007856814 |
| Train | 57.20291752 | 0.00221321 |
| Train | 53.41558055 | 0.000693937 |
| Train | 63.01431366 | 0.013007915 |
| Train | 65.11982637 | 0.024519185 |
| Train | 63.68300383 | 0.015921132 |
| Train | 56.55914283 | 0.001817451 |
| Train | 56.66220239 | 0.001875694 |
| Train | 73.79216538 | 0.264207919 |
| Train | 50.23853851 | 0.00026207 |
| Train | 45.31513371 | 5.79232E-05 |
| Train | 82.31872746 | 0.830665626 |
| Train | 80.37089588 | 0.72969461 |
| Train | 52.87935367 | 0.000588784 |
| Train | 53.68149828 | 0.000752848 |
| Train | 68.68726655 | 0.069813052 |
| Train | 49.61833705 | 0.000216693 |
| Train | 48.26483511 | 0.000143097 |
| Train | 68.7344907 | 0.070759371 |
| Train | 71.70467969 | 0.159183913 |
| Train | 63.81245059 | 0.016555141 |
| Train | 49.83573537 | 0.000231627 |
| Train | 68.82318371 | 0.072568543 |
| Train | 61.22843198 | 0.0075643 |
| Train | 50.59423192 | 0.000292262 |
| Train | 85.5756449 | 0.930153169 |
| Train | 56.19531197 | 0.001625902 |
| Train | 42.20265528 | 2.23037E-05 |
| Train | 78.64574214 | 0.613980898 |
| Train | 56.59162664 | 0.001835612 |
| Train | 51.49886776 | 0.000385659 |
| Train | 44.03866214 | 3.91626E-05 |
| Train | 54.15935358 | 0.000871549 |
| Train | 55.47050761 | 0.001302303 |
| Train | 64.0353024 | 0.017705245 |
| Train | 57.61679811 | 0.002511941 |
| Train | 56.33417311 | 0.001696508 |
| Train | 63.75170066 | 0.016254569 |
| Train | 55.71180712 | 0.001402177 |
| Train | 52.95983951 | 0.000603487 |
| Train | 87.63420559 | 0.961590243 |
| Train | 62.40605033 | 0.010818501 |
| Train | 62.92317723 | 0.012653969 |
| Train | 44.81432376 | 4.96778E-05 |
| Train | 46.72542454 | 8.92583E-05 |
| Train | 40.6432099 | 1.38263E-05 |
| Train | 55.74688809 | 0.001417321 |
| Train | 44.32567777 | 4.27654E-05 |
| Train | 56.95680806 | 0.002052664 |
| Train | 54.09466756 | 0.000854447 |
| Train | 58.69925694 | 0.003497295 |
| Train | 42.48455574 | 2.43173E-05 |
| Train | 63.65472576 | 0.015785845 |
| Train | 56.64380368 | 0.001865162 |
| Train | 55.07452925 | 0.001153571 |
| Train | 50.72301792 | 0.000304031 |
| Train | 62.9693664 | 0.012832149 |
| Train | 55.73976732 | 0.001414234 |
| Train | 52.45565798 | 0.000517087 |
| Train | 42.08535104 | 2.15157E-05 |
| Train | 59.66027496 | 0.004690206 |
| Train | 48.66332851 | 0.000161692 |
| Train | 57.87924496 | 0.002721876 |
| Train | 56.14046282 | 0.001598829 |
| Train | 65.31162311 | 0.025965876 |
| Train | 42.91235237 | 2.77258E-05 |
| Train | 49.20389596 | 0.000190838 |
| Train | 47.26249847 | 0.000105236 |
| Train | 63.70364792 | 0.016020621 |
| Train | 39.19212636 | 8.86068E-06 |
| Train | 47.74322422 | 0.000121948 |
| Train | 51.3392194 | 0.000367241 |
| Train | 53.71096784 | 0.000759676 |
| Train | 52.82485085 | 0.000579031 |
| Train | 46.43836983 | 8.17381E-05 |
| Train | 46.11789433 | 7.40883E-05 |
| Train | 68.04953815 | 0.058133804 |
| Train | 50.05781192 | 0.000247946 |
| Train | 46.64942952 | 8.72025E-05 |
| Train | 47.24688629 | 0.000104733 |
| Train | 55.77527187 | 0.001429692 |
| Train | 49.01318532 | 0.00018 |
| Train | 55.02324969 | 0.001135594 |
| Train | 78.86345394 | 0.629677995 |
| Train | 76.32913549 | 0.438739016 |
| Train | 55.43053935 | 0.001286461 |
| Train | 64.62987126 | 0.021171233 |
| Train | 48.45235329 | 0.000151565 |
| Train | 52.81098372 | 0.000576576 |
| Train | 79.96766449 | 0.704626669 |
| Train | 49.59807309 | 0.000215351 |
| Train | 51.19526611 | 0.000351389 |
| Train | 56.48091449 | 0.00177445 |
| Train | 62.21871091 | 0.010220711 |
| Train | 53.63721669 | 0.000742702 |
| Train | 62.60868342 | 0.011504049 |
| Train | 65.26887528 | 0.025636403 |
| Train | 58.90177185 | 0.003720525 |
| Train | 57.93075518 | 0.00276509 |
| Train | 47.59823517 | 0.000116646 |
| Train | 49.78372241 | 0.000227963 |
| Train | 64.28651815 | 0.01909595 |
| Train | 59.8530072 | 0.004974325 |
| Train | 49.52068365 | 0.000210302 |
| Train | 44.04267535 | 3.92108E-05 |
| Train | 83.6286793 | 0.879957944 |
| Train | 63.24521364 | 0.013948989 |
| Train | 66.87982873 | 0.041336596 |
| Train | 53.7126495 | 0.000760068 |
| Train | 53.44455318 | 0.000700126 |
| Train | 47.86922286 | 0.000126751 |
| Train | 46.03235607 | 7.21704E-05 |
| Train | 50.06749233 | 0.000248683 |
| Train | 46.1010475 | 7.37066E-05 |
| Train | 50.91446065 | 0.000322407 |
| Train | 46.66149853 | 8.75258E-05 |
| Train | 71.79847182 | 0.163071151 |
| Train | 55.74238207 | 0.001415367 |
| Train | 50.71256821 | 0.000303059 |
| Train | 57.72633856 | 0.002597525 |
| Train | 72.45325291 | 0.192356244 |
| Train | 57.24284185 | 0.00224041 |
| Train | 69.72064771 | 0.093410105 |
| Train | 82.92035066 | 0.855057584 |
| Train | 70.36030753 | 0.11139729 |
| Train | 41.82890494 | 1.98886E-05 |
| Train | 73.68708258 | 0.257991579 |
| Train | 63.69709039 | 0.015988956 |
| Train | 67.66173544 | 0.051954667 |
| Train | 59.66187302 | 0.004692493 |
| Train | 40.31757584 | 1.25125E-05 |
| Train | 57.40921714 | 0.002357398 |
| Train | 54.49025197 | 0.000964534 |
| Train | 78.03418154 | 0.568700113 |
| Train | 39.47072157 | 9.65089E-06 |
| Train | 70.38926268 | 0.112279201 |
| Train | 49.22262301 | 0.000191937 |
| Train | 65.72233892 | 0.029348603 |
| Train | 59.76726499 | 0.004845871 |
| Train | 59.10975253 | 0.003964558 |
| Train | 81.31356242 | 0.782812254 |
| Train | 42.78568741 | 2.66696E-05 |
| Train | 73.73365318 | 0.260734689 |
| Train | 84.76251538 | 0.91211275 |
| Train | 54.21976912 | 0.000887831 |
| Train | 49.62611891 | 0.000217211 |
| Train | 46.97244675 | 9.62812E-05 |
| Train | 54.30065614 | 0.000910107 |
| Train | 48.23192393 | 0.00014166 |
| Train | 60.69665898 | 0.006433491 |
| Train | 71.62715282 | 0.156027841 |
| Train | 42.94875798 | 2.80371E-05 |
| Train | 73.62761057 | 0.254516006 |
| Train | 48.03635528 | 0.000133416 |
| Train | 52.24469087 | 0.000484711 |
| Train | 42.34669695 | 2.33108E-05 |
| Train | 45.86173705 | 6.84919E-05 |
| Train | 71.43985203 | 0.148613309 |
| Train | 68.27461548 | 0.062030087 |
| Train | 54.18960271 | 0.000879664 |
| Train | 45.92924403 | 6.99244E-05 |
| Train | 49.23935912 | 0.000192924 |
| Train | 48.25168022 | 0.000142521 |
| Train | 47.27848588 | 0.000105753 |
| Train | 48.47547048 | 0.000152643 |
| Train | 64.40591005 | 0.019793913 |
| Train | 59.29177001 | 0.004191171 |
| Train | 57.56648033 | 0.002473576 |
| Train | 46.51419664 | 8.36607E-05 |
| Train | 45.21104365 | 5.61037E-05 |
| Train | 63.73165596 | 0.016156575 |
| Train | 62.73030871 | 0.011935975 |
| Train | 54.18188202 | 0.000877586 |
| Train | 49.50946373 | 0.00020958 |
| Train | 56.3448711 | 0.001702073 |
| Train | 84.19129943 | 0.897020843 |
| Train | 61.11986192 | 0.007318434 |
| Train | 68.70892209 | 0.070245508 |
| Train | 49.73421473 | 0.000224529 |
| Train | 47.27508579 | 0.000105643 |
| Train | 49.64799309 | 0.000218672 |
| Train | 60.06430469 | 0.005305524 |
| Train | 42.35499285 | 2.33702E-05 |
| Train | 78.76171454 | 0.622374381 |
| Train | 78.8901798 | 0.631586904 |
| Train | 53.18362514 | 0.000646325 |
| Train | 43.49871247 | 3.3187E-05 |
| Train | 55.43360972 | 0.001287671 |
| Train | 56.76378592 | 0.001934925 |
| Train | 62.23636044 | 0.010275606 |
| Train | 48.9317342 | 0.000175561 |
| Train | 80.85582863 | 0.758004957 |
| Train | 59.14436895 | 0.004006694 |
| Train | 50.75950802 | 0.000307451 |
| Train | 64.29134728 | 0.019123712 |
| Train | 41.47974376 | 1.78693E-05 |
| Train | 46.32115382 | 7.88526E-05 |
| Train | 84.29509105 | 0.899923853 |
| Train | 40.28260438 | 1.2379E-05 |
| Train | 61.4546707 | 0.00810329 |
| Train | 47.1360885 | 0.000101235 |
| Train | 58.78073961 | 0.003585461 |
| Train | 52.51408727 | 0.000526429 |
| Train | 50.49364028 | 0.000283388 |
| Train | 46.19769218 | 7.59234E-05 |
| Train | 61.94504558 | 0.009405768 |
| Train | 52.14693846 | 0.000470404 |
| Train | 49.22010413 | 0.000191789 |
| Train | 57.4527077 | 0.002388971 |
| Train | 59.22043048 | 0.004100855 |
| Train | 58.88060172 | 0.00369654 |
| Train | 59.05735678 | 0.003901617 |
| Train | 54.50973804 | 0.000970309 |
| Train | 52.99269005 | 0.000609593 |
| Train | 51.8283543 | 0.000426642 |
| Train | 66.97777027 | 0.04254322 |
| Train | 47.56865464 | 0.000115593 |
| Train | 45.85369779 | 6.83233E-05 |
| Train | 71.88462114 | 0.16670861 |
| Train | 57.24266982 | 0.002240293 |
| Train | 50.33675843 | 0.000270081 |
| Train | 55.62774487 | 0.001366545 |
| Train | 47.85675874 | 0.000126268 |
| Train | 56.62776833 | 0.00185603 |
| Train | 63.21220724 | 0.013810464 |
| Train | 81.78388024 | 0.806331618 |
| Train | 67.62098773 | 0.051342686 |
| Train | 75.7208549 | 0.393457157 |
| Train | 37.3729526 | 5.07233E-06 |
| Train | 53.59180474 | 0.000732439 |
| Train | 45.18693544 | 5.56905E-05 |
| Train | 61.26112863 | 0.007639941 |
| Train | 47.43717657 | 0.000111026 |
| Train | 47.45054346 | 0.000111482 |
| Train | 49.99977322 | 0.000243573 |
| Train | 45.43393907 | 6.00721E-05 |
| Train | 65.43404983 | 0.026932445 |
| Train | 46.38962164 | 8.05254E-05 |
| Train | 76.95861982 | 0.486688677 |
| Train | 67.69428954 | 0.052448572 |
| Train | 73.04813157 | 0.222291878 |
| Train | 47.49412145 | 0.000112981 |
| Train | 45.31457478 | 5.79132E-05 |
| Train | 50.15510069 | 0.000255452 |
| Train | 52.7808512 | 0.000571276 |
| Train | 55.71912639 | 0.001405323 |
| Train | 51.88908829 | 0.000434659 |
| Train | 64.36343858 | 0.019542809 |
| Train | 53.86545618 | 0.0007965 |
| Train | 47.42469642 | 0.000110602 |
| Train | 39.66286339 | 1.02366E-05 |
| Train | 50.35732733 | 0.00027179 |
| Train | 58.18710448 | 0.002990538 |
| Train | 92.38240033 | 0.990772078 |
| Train | 41.42525037 | 1.75732E-05 |
| Train | 51.62539166 | 0.000400909 |
| Train | 59.32884058 | 0.004238881 |
| Train | 46.66320314 | 8.75716E-05 |
| Train | 58.99668571 | 0.003829976 |
| Train | 51.20778755 | 0.00035274 |
| Train | 47.31055289 | 0.000106798 |
| Train | 50.89865385 | 0.000320849 |
| Train | 63.91018583 | 0.017050197 |
| Train | 72.73951888 | 0.206362552 |
| Train | 68.22654373 | 0.061177936 |
| Train | 61.04905757 | 0.007162379 |
| Train | 46.81922283 | 9.18625E-05 |
| Train | 53.17470943 | 0.000644562 |
| Train | 56.92735475 | 0.002034247 |
| Train | 58.13180818 | 0.002940406 |
| Train | 51.89385026 | 0.000435294 |
| Train | 50.06966825 | 0.000248849 |
| Train | 41.37801292 | 1.73205E-05 |
| Train | 44.84787456 | 5.01915E-05 |
| Train | 48.58358236 | 0.000157787 |
| Train | 83.86961131 | 0.887545462 |
| Train | 60.82875405 | 0.006697648 |
| Train | 53.29117016 | 0.00066798 |
| Train | 42.4039771 | 2.37239E-05 |
| Train | 42.02576115 | 2.11261E-05 |
| Train | 68.26961784 | 0.06194098 |
| Train | 58.20599829 | 0.003007862 |
| Train | 87.16101955 | 0.95585726 |
| Train | 67.49990933 | 0.04956417 |
| Train | 49.61012209 | 0.000216148 |
| Train | 73.97117843 | 0.275016285 |
| Train | 47.24224095 | 0.000104584 |
| Train | 45.69452021 | 6.50687E-05 |
| Train | 74.60237503 | 0.315232105 |
| Train | 80.18477522 | 0.718291377 |
| Train | 97.23965267 | 0.997904083 |
| Train | 77.40257741 | 0.520707233 |
| Train | 56.3661458 | 0.001713194 |
| Train | 71.8332588 | 0.164532182 |
| Train | 53.87452256 | 0.000798716 |
| Train | 79.96257123 | 0.704301572 |
| Train | 45.52646078 | 6.18007E-05 |
| Train | 57.13154177 | 0.002165401 |
| Train | 52.91631495 | 0.000595491 |
| Train | 69.07243645 | 0.077883541 |
| Train | 59.84454292 | 0.004961495 |
| Train | 59.24649796 | 0.00413363 |
| Train | 39.06736292 | 8.5281E-06 |
| Train | 62.60009117 | 0.011474126 |
| Train | 41.66856164 | 1.89344E-05 |
| Train | 57.19792844 | 0.002209835 |
| Train | 51.68305782 | 0.000408059 |
| Train | 39.2686193 | 9.07096E-06 |
| Train | 44.10679702 | 3.99894E-05 |
| Train | 60.81463444 | 0.006668907 |
| Train | 56.70784596 | 0.001902081 |
| Train | 72.247529 | 0.182745675 |
| Train | 44.75249531 | 4.87449E-05 |
| Train | 54.42822311 | 0.000946379 |
| Train | 52.66154919 | 0.000550766 |
| Train | 64.92408997 | 0.02312386 |
| Train | 56.72767783 | 0.00191366 |
| Train | 64.29118244 | 0.019122758 |
| Train | 53.92661146 | 0.000811565 |
| Train | 47.48186295 | 0.000112557 |
| Train | 63.83258399 | 0.01665595 |
| Train | 63.39276009 | 0.014585164 |
| Train | 50.65193038 | 0.000297478 |
| Train | 59.5819463 | 0.004579405 |
| Train | 47.15565427 | 0.000101844 |
| Train | 70.96233806 | 0.131023192 |
| Train | 54.71950289 | 0.001034705 |
| Train | 46.62581081 | 8.65733E-05 |
| Train | 58.66086357 | 0.003456505 |
| Train | 59.79357971 | 0.004884939 |
| Train | 49.78254664 | 0.000227881 |
| Train | 51.57972022 | 0.000395336 |
| Train | 60.82839081 | 0.00669691 |
| Train | 48.92367245 | 0.000175127 |
| Train | 61.1611436 | 0.007410971 |
| Train | 48.58890002 | 0.000158044 |
| Train | 80.1895047 | 0.718584735 |
| Train | 45.55693601 | 6.23809E-05 |
| Train | 57.35404151 | 0.002317941 |
| Train | 70.5879136 | 0.118495506 |
| Train | 42.01597425 | 2.10628E-05 |
| Train | 42.18976657 | 2.22157E-05 |
| Train | 57.82995185 | 0.002681153 |
| Train | 63.76028139 | 0.01629669 |
| Train | 74.62001392 | 0.316400789 |
| Train | 64.49824212 | 0.02035077 |
| Train | 69.00736423 | 0.076462534 |
| Train | 53.39252077 | 0.000689051 |
| Train | 47.11329686 | 0.00010053 |
| Train | 59.12379043 | 0.003981592 |
| Train | 58.97839109 | 0.003808633 |
| Train | 46.80955791 | 9.15907E-05 |
| Train | 49.1904635 | 0.000190054 |
| Train | 68.93621031 | 0.074935993 |
| Train | 57.92576073 | 0.00276087 |
| Train | 40.22816484 | 1.21741E-05 |
| Train | 44.88802878 | 5.08133E-05 |
| Train | 75.98295038 | 0.41279211 |
| Train | 71.6377267 | 0.156455239 |
| Train | 55.17199687 | 0.001188526 |
| Train | 55.41184215 | 0.001279116 |
| Train | 54.85169195 | 0.001077462 |
| Train | 49.07159041 | 0.000183252 |
| Train | 57.86523094 | 0.002710236 |
| Train | 59.57313962 | 0.004567112 |
| Train | 40.85412601 | 1.47501E-05 |
| Train | 56.93024316 | 0.002036045 |
| Train | 56.30424896 | 0.001681039 |
| Train | 39.24799122 | 9.01377E-06 |
| Train | 78.11643646 | 0.574875665 |
| Train | 56.463625 | 0.001765084 |
| Train | 56.97165927 | 0.002062014 |
| Train | 73.64005248 | 0.255240606 |
| Train | 44.55713276 | 4.59107E-05 |
| Train | 46.23279848 | 7.67451E-05 |
| Train | 57.66732043 | 0.00255106 |
| Train | 69.93792835 | 0.099207192 |
| Train | 50.07566464 | 0.000249306 |
| Train | 52.07418635 | 0.000460031 |
| Train | 46.84347075 | 9.25481E-05 |
| Train | 69.86147714 | 0.09713185 |
| Train | 58.41917372 | 0.003210394 |
| Train | 49.64161184 | 0.000218245 |
| Train | 68.13913482 | 0.059656493 |
| Train | 36.40752982 | 3.77261E-06 |
| Train | 63.31482147 | 0.014245632 |
| Train | 72.85115644 | 0.212025378 |
| Train | 67.07208871 | 0.043737022 |
| Train | 75.83994944 | 0.402205464 |
| Train | 55.2780016 | 0.001227746 |
| Train | 66.8630014 | 0.04113257 |
| Train | 49.20322841 | 0.000190799 |
| Train | 59.89362669 | 0.005036356 |
| Train | 50.38137397 | 0.000273801 |
| Train | 53.64668571 | 0.00074486 |
| Train | 62.2451387 | 0.01030302 |
| Train | 77.59213232 | 0.535191945 |
| Train | 84.3853863 | 0.902390024 |
| Train | 57.55121396 | 0.002462053 |
| Train | 54.06956955 | 0.000847902 |
| Train | 78.54623882 | 0.606724767 |
| Train | 60.35053686 | 0.005789416 |
| Train | 80.13362546 | 0.715106835 |
| Train | 62.56927964 | 0.011367458 |
| Train | 59.08093187 | 0.003929812 |
| Train | 52.15220648 | 0.000471164 |
| Train | 55.1265463 | 0.001172096 |
| Train | 47.91747334 | 0.00012864 |
| Train | 54.33696458 | 0.000920287 |
| Train | 69.78199553 | 0.09501533 |
| Train | 61.06477735 | 0.007196737 |
| Train | 65.28166907 | 0.025734582 |
| Train | 55.4403686 | 0.001290339 |
| Train | 52.14840163 | 0.000470615 |
| Train | 71.89300031 | 0.167065859 |
| Train | 52.97313513 | 0.000605951 |
| Train | 80.94685418 | 0.763087884 |
| Train | 51.16321707 | 0.000347953 |
| Train | 58.2842842 | 0.003080715 |
| Train | 64.42636528 | 0.019915972 |
| Train | 67.76488727 | 0.053534902 |
| Train | 77.38054358 | 0.519020765 |
| Train | 74.42805878 | 0.30380948 |
| Train | 77.57435043 | 0.533835287 |
| Train | 49.50934177 | 0.000209572 |
| Train | 71.145722 | 0.137559462 |
| Train | 78.5006793 | 0.603386408 |
| Train | 46.82201361 | 9.19412E-05 |
| Train | 53.91641034 | 0.000809033 |
| Train | 51.79328726 | 0.000422081 |
| Train | 47.55763134 | 0.000115203 |
| Train | 43.09482401 | 2.93213E-05 |
| Train | 80.55294902 | 0.740563244 |
| Train | 47.46077845 | 0.000111832 |
| Train | 54.89825222 | 0.001092938 |
| Train | 51.25640907 | 0.000358036 |
| Train | 75.8220802 | 0.400888714 |
| Train | 46.59373797 | 8.57261E-05 |
| Train | 50.61980352 | 0.000294562 |
| Train | 42.90082305 | 2.7628E-05 |
| Train | 44.80861646 | 4.9591E-05 |
| Train | 56.62963746 | 0.001857092 |
| Train | 53.93175743 | 0.000812846 |
| Train | 40.61110141 | 1.36909E-05 |
| Train | 67.00496696 | 0.042884232 |
| Train | 45.222697 | 5.63045E-05 |
| Train | 68.00364114 | 0.057368006 |
| Train | 61.99159588 | 0.009539704 |
| Train | 56.44627621 | 0.001755735 |
| Train | 55.1068679 | 0.001165053 |
| Train | 52.10123259 | 0.00046386 |
| Train | 64.36709197 | 0.019564284 |
| Train | 53.68614015 | 0.000753919 |
| Train | 57.217228 | 0.002222922 |
| Train | 44.93543349 | 5.15573E-05 |
| Train | 49.86752016 | 0.000233895 |
| Train | 59.72501556 | 0.004783795 |
| Train | 83.97219062 | 0.890646866 |
| Train | 66.24379117 | 0.03426301 |
| Train | 71.32755442 | 0.144308903 |
| Train | 48.66229584 | 0.000161641 |
| Train | 52.5734069 | 0.000536087 |
| Train | 37.58121692 | 5.40682E-06 |
| Train | 45.12319806 | 5.46127E-05 |
| Train | 67.32397757 | 0.047083714 |
| Train | 47.03728829 | 9.82145E-05 |
| Train | 54.95775553 | 0.00111304 |
| Train | 46.88852345 | 9.38354E-05 |
| Train | 55.5267671 | 0.001324935 |
| Train | 47.48136876 | 0.00011254 |
| Train | 50.76347543 | 0.000307826 |
| Train | 52.01336817 | 0.000451535 |
| Train | 45.99062856 | 7.12529E-05 |
| Train | 70.17286962 | 0.105833675 |
| Train | 81.45660476 | 0.790177025 |
| Train | 67.44039318 | 0.048711484 |
| Train | 57.98538181 | 0.002811665 |
| Train | 63.79869369 | 0.016486597 |
| Train | 63.30965865 | 0.014223417 |
| Train | 82.90135016 | 0.85433396 |
| Train | 72.2021539 | 0.180676866 |
| Train | 40.70702088 | 1.40995E-05 |
| Train | 50.10240354 | 0.000251358 |
| Train | 61.20625659 | 0.007513426 |
| Train | 54.04742369 | 0.000842168 |
| Train | 64.95352795 | 0.023328637 |
| Train | 41.70514446 | 1.9148E-05 |
| Train | 50.99670571 | 0.000330639 |
| Train | 50.26063597 | 0.000263852 |
| Train | 51.51823788 | 0.000387956 |
| Train | 43.85840947 | 3.70568E-05 |
| Train | 52.36711809 | 0.000503244 |
| Train | 85.83425765 | 0.935132698 |
| Train | 37.38975124 | 5.09853E-06 |
| Train | 59.84592301 | 0.004963584 |
| Train | 55.65594828 | 0.001378397 |
| Train | 66.29643713 | 0.03480121 |
| Train | 44.3247503 | 4.27532E-05 |
| Train | 62.50216285 | 0.011138481 |
| Train | 48.90008597 | 0.000173866 |
| Train | 51.2963607 | 0.000362448 |
| Train | 56.47013142 | 0.001768603 |
| Train | 44.37773268 | 4.34534E-05 |
| Train | 48.29187417 | 0.000144288 |
| Train | 58.78916633 | 0.003594705 |
| Train | 58.46224011 | 0.003252933 |
| Train | 47.3007142 | 0.000106476 |
| Train | 51.96954968 | 0.000445511 |
| Train | 47.13586516 | 0.000101228 |
| Train | 51.7154562 | 0.000412131 |
| Train | 38.68514654 | 7.58495E-06 |
| Train | 81.61505259 | 0.798118938 |
| Train | 49.49168361 | 0.00020844 |
| Train | 46.52839961 | 8.40258E-05 |
| Train | 51.72740424 | 0.000413643 |
| Train | 49.53725834 | 0.000211373 |
| Train | 46.23621226 | 7.68254E-05 |
| Train | 43.73094718 | 3.56364E-05 |
| Train | 81.45913277 | 0.79030552 |
| Train | 64.90279877 | 0.022976843 |
| Train | 49.5977179 | 0.000215328 |
| Train | 51.35628828 | 0.000369168 |
| Train | 52.20990281 | 0.00047957 |
| Train | 45.74149065 | 6.60126E-05 |
| Train | 65.5280286 | 0.027698034 |
| Train | 50.78191831 | 0.000309571 |
| Train | 49.8756298 | 0.000234478 |
| Train | 54.91210152 | 0.001097584 |
| Train | 41.38854521 | 1.73765E-05 |
| Train | 49.22259259 | 0.000191935 |
| Train | 52.16729667 | 0.000473348 |
| Train | 46.64126587 | 8.69845E-05 |
| Train | 72.09235261 | 0.1757462 |
| Train | 52.99261225 | 0.000609579 |
| Train | 46.13787141 | 7.45435E-05 |
| Train | 78.10383019 | 0.573930667 |
| Train | 66.338753 | 0.03523969 |
| Train | 54.14193859 | 0.000866911 |
| Train | 58.60882148 | 0.00340197 |
| Train | 49.54027009 | 0.000211568 |
| Train | 58.05316446 | 0.002870547 |
| Train | 42.8065746 | 2.6841E-05 |
| Train | 43.67026063 | 3.49794E-05 |
| Train | 59.45434654 | 0.004404461 |
| Train | 61.47362084 | 0.008150131 |
| Train | 50.86743206 | 0.000317793 |
| Train | 46.09051788 | 7.3469E-05 |
| Train | 68.3375028 | 0.063161544 |
| Train | 42.13319962 | 2.18337E-05 |
| Train | 61.94177264 | 0.009396425 |
| Train | 38.97130821 | 8.28058E-06 |
| Train | 57.67937118 | 0.002560479 |
| Train | 67.29896664 | 0.046740809 |
| Train | 69.8791917 | 0.097609258 |
| Train | 63.34166663 | 0.014361683 |
| Train | 37.36659082 | 5.06244E-06 |
| Train | 55.52185964 | 0.001322945 |
| Train | 65.15228618 | 0.024758367 |
| Train | 54.75947025 | 0.001047451 |
| Train | 63.75626544 | 0.016276955 |
| Train | 69.35716896 | 0.084389554 |
| Train | 54.66450082 | 0.001017418 |
| Train | 48.04686019 | 0.000133846 |
| Train | 46.19461938 | 7.58519E-05 |
| Train | 43.79299122 | 3.63209E-05 |
| Train | 78.96511326 | 0.636917038 |
| Train | 42.72874008 | 2.6208E-05 |
| Train | 60.16537364 | 0.005471612 |
| Train | 43.93072634 | 3.78877E-05 |
| Train | 44.16998643 | 4.07718E-05 |
| Train | 63.46338117 | 0.014899691 |
| Train | 45.66706577 | 6.45233E-05 |
| Train | 57.01238764 | 0.002087873 |
| Train | 42.5993869 | 2.51888E-05 |
| Train | 66.83209801 | 0.040760462 |
| Train | 80.57735139 | 0.741998298 |
| Train | 55.36599818 | 0.001261283 |
| Train | 58.58971953 | 0.003382169 |
| Train | 54.04032472 | 0.000840338 |
| Train | 55.59396573 | 0.001352482 |
| Train | 43.49402238 | 3.31393E-05 |
| Train | 51.99087646 | 0.000448433 |
| Train | 61.74575077 | 0.00885312 |
| Train | 75.07926861 | 0.347615426 |
| Train | 75.95061109 | 0.410390482 |
| Train | 44.08616609 | 3.97372E-05 |
| Train | 47.98933789 | 0.000131506 |
| Train | 48.8598025 | 0.000171731 |
| Train | 67.05858586 | 0.043564174 |
| Train | 59.79974003 | 0.004894131 |
| Train | 69.98370267 | 0.100468607 |
| Train | 59.97715891 | 0.005166347 |
| Train | 47.68636061 | 0.000119841 |
| Train | 48.34036996 | 0.000146449 |
| Train | 84.02107398 | 0.892098222 |
| Train | 75.00252169 | 0.342297863 |
| Train | 53.99516727 | 0.000828792 |
| Train | 54.79635699 | 0.001059353 |
| Train | 40.74051104 | 1.42451E-05 |
| Train | 68.75711418 | 0.071216801 |
| Train | 76.62561409 | 0.461235471 |
| Train | 66.31526036 | 0.034995612 |
| Train | 46.95686555 | 9.58224E-05 |
| Train | 92.99001865 | 0.99232871 |
| Train | 40.23571338 | 1.22023E-05 |
| Train | 38.65279829 | 7.51008E-06 |
| Train | 46.1552263 | 7.49412E-05 |
| Train | 49.19573814 | 0.000190361 |
| Train | 61.25564758 | 0.007627208 |
| Train | 75.91265195 | 0.407577136 |
| Train | 67.16794537 | 0.044982988 |
| Train | 73.22287518 | 0.231692889 |
| Train | 84.82572526 | 0.913654121 |
| Train | 67.72924843 | 0.052983861 |
| Train | 61.44274707 | 0.008073956 |
| Train | 45.60853745 | 6.33757E-05 |
| Train | 52.31518503 | 0.000495297 |
| Train | 67.29212775 | 0.046647471 |
| Train | 77.70684282 | 0.543930368 |
| Train | 63.61675788 | 0.015605983 |
| Train | 64.68782529 | 0.02154264 |
| Train | 47.92362837 | 0.000128883 |
| Train | 50.26804396 | 0.000264452 |
| Train | 67.25628988 | 0.046161219 |
| Train | 47.09703269 | 0.00010003 |
| Train | 82.9071634 | 0.854555689 |
| Train | 76.27999457 | 0.435031931 |
| Train | 54.08892868 | 0.000852946 |
| Train | 41.98363396 | 2.0855E-05 |
| Train | 41.98664155 | 2.08742E-05 |
| Train | 59.71778689 | 0.004773253 |
| Train | 77.03374824 | 0.492445415 |
| Train | 47.89691328 | 0.000127832 |
| Train | 53.4198319 | 0.000694842 |
| Train | 56.36462348 | 0.001712396 |
| Train | 40.34391866 | 1.26139E-05 |
| Train | 65.56216376 | 0.027981317 |
| Train | 69.56054639 | 0.089334796 |
| Train | 57.91245036 | 0.002749655 |
| Train | 57.91598381 | 0.002752628 |
| Train | 54.78006227 | 0.001054079 |
| Train | 56.7929836 | 0.001952292 |
| Train | 47.63697375 | 0.00011804 |
| Train | 86.66158306 | 0.948924958 |
| Train | 64.87602771 | 0.022793266 |
| Train | 51.31387816 | 0.000364399 |
| Train | 54.55952125 | 0.00098522 |
| Train | 50.18392683 | 0.00025772 |
| Train | 46.86428128 | 9.31405E-05 |
| Train | 52.12847896 | 0.00046775 |
| Train | 46.31335229 | 7.86642E-05 |
| Train | 47.14934349 | 0.000101648 |
| Train | 53.70546157 | 0.000758396 |
| Train | 46.92440724 | 9.48735E-05 |
| Train | 71.05079614 | 0.134142459 |
| Train | 75.25877097 | 0.360200281 |
| Train | 51.48172488 | 0.000383638 |
| Train | 73.41426487 | 0.242303864 |
| Train | 54.39784816 | 0.000937613 |
| Train | 42.17162191 | 2.20924E-05 |
| Train | 67.5174853 | 0.049818672 |
| Train | 64.59475073 | 0.020949198 |
| Train | 125.7071374 | 0.99999966 |
| Train | 79.01501685 | 0.640448266 |
| Train | 50.38043424 | 0.000273722 |
| Train | 73.05558303 | 0.222687136 |
| Train | 73.99607389 | 0.276540847 |
| Train | 46.5585035 | 8.4805E-05 |
| Train | 84.28161332 | 0.899551037 |
| Train | 42.16112929 | 2.20215E-05 |
| Train | 64.9822333 | 0.023530039 |
| Train | 53.32219799 | 0.000674362 |
| Train | 67.3859905 | 0.047944269 |
| Train | 46.63209375 | 8.67402E-05 |
| Train | 52.25009581 | 0.000485514 |
| Train | 51.69098181 | 0.000409051 |
| Train | 77.22808076 | 0.507341692 |
| Train | 43.49520689 | 3.31514E-05 |
| Train | 84.19450397 | 0.897111607 |
| Train | 58.89372236 | 0.003711387 |
| Train | 54.50785331 | 0.000969749 |
| Train | 67.3211403 | 0.047044693 |
| Train | 77.98888423 | 0.565289938 |
| Train | 48.37625221 | 0.000148069 |
| Train | 52.53880348 | 0.000530432 |
| Train | 70.73599386 | 0.123321259 |
| Train | 76.17379739 | 0.427045939 |
| Train | 55.4682402 | 0.0013014 |
| Train | 72.75319732 | 0.207050328 |
| Train | 40.89624964 | 1.49418E-05 |
| Train | 51.31765024 | 0.000364821 |
| Train | 46.96063576 | 9.59332E-05 |
| Train | 55.15938353 | 0.001183944 |
| Train | 48.3708776 | 0.000147826 |
| Train | 54.41590253 | 0.000942813 |
| Train | 45.26867682 | 5.71039E-05 |
| Train | 43.83984707 | 3.68465E-05 |
| Train | 46.45835023 | 8.22403E-05 |
| Train | 56.54701054 | 0.001810715 |
| Train | 57.525374 | 0.002442669 |
| Train | 49.72723984 | 0.00022405 |
| Train | 62.76758118 | 0.012071521 |
| Train | 54.61600493 | 0.001002415 |
| Train | 70.38203997 | 0.112058636 |
| Train | 74.63272923 | 0.317244722 |
| Train | 47.13480466 | 0.000101195 |
| Train | 78.60631101 | 0.611111287 |
| Train | 97.03596478 | 0.997769302 |
| Train | 59.03942154 | 0.003880301 |
| Train | 62.92767634 | 0.012671215 |
| Train | 64.52174332 | 0.020494936 |
| Train | 79.80994622 | 0.694462553 |
| Train | 60.67373831 | 0.006388722 |
| Train | 60.57478986 | 0.006198973 |
| Train | 38.76054557 | 7.76235E-06 |
| Train | 60.77844286 | 0.006595792 |
| Train | 44.56615464 | 4.60379E-05 |
| Train | 47.4768514 | 0.000112385 |
| Train | 75.09856943 | 0.348959159 |
| Train | 63.05033058 | 0.01315047 |
| Train | 49.51761233 | 0.000210104 |
| Train | 57.86300165 | 0.002708389 |
| Train | 74.88360357 | 0.334136394 |
| Train | 68.54080808 | 0.066952434 |
| Train | 86.65292248 | 0.948796094 |
| Train | 60.12826355 | 0.005410035 |
| Train | 54.96786204 | 0.001116491 |
| Train | 81.17740871 | 0.775630264 |
| Train | 74.47113042 | 0.306610211 |
| Train | 79.42713421 | 0.669003396 |
| Train | 64.4416008 | 0.020007368 |
| Train | 58.18910043 | 0.002992363 |
| Train | 46.75220829 | 8.99943E-05 |
| Train | 70.35332155 | 0.111185392 |
| Train | 50.404704 | 0.000275766 |
| Train | 76.8793886 | 0.480621428 |
| Train | 50.98426046 | 0.00032938 |
| Train | 56.68130903 | 0.001886695 |
| Train | 53.3727336 | 0.000684886 |
| Train | 57.34897991 | 0.002314355 |
| Train | 45.19354611 | 5.58035E-05 |
| Train | 69.55420852 | 0.089176816 |
| Train | 59.06158159 | 0.003906654 |
| Train | 41.90402748 | 2.03521E-05 |
| Train | 44.28973671 | 4.22967E-05 |
| Train | 56.91718829 | 0.002027928 |
| Train | 48.24798206 | 0.000142359 |
| Train | 79.23984567 | 0.656165225 |
| Train | 46.97403591 | 9.63281E-05 |
| Train | 48.97795039 | 0.000178066 |
| Train | 42.71044787 | 2.60614E-05 |
| Train | 76.16017969 | 0.426024569 |
| Train | 62.33670345 | 0.010593293 |
| Train | 58.83273692 | 0.003642878 |
| Train | 56.96914186 | 0.002060426 |
| Train | 60.58003269 | 0.006208885 |
| Train | 53.6631763 | 0.000748633 |
| Train | 48.35043275 | 0.000146902 |
| Train | 58.3793593 | 0.003171562 |
| Train | 41.75878616 | 1.94656E-05 |
| Train | 56.44803548 | 0.001756681 |
| Train | 78.03466426 | 0.56873644 |
| Train | 59.80615525 | 0.00490372 |
| Train | 77.09920652 | 0.497462908 |
| Train | 46.59109211 | 8.56566E-05 |
| Train | 38.8372441 | 7.94707E-06 |
| Train | 74.3276977 | 0.297339941 |
| Train | 67.99482022 | 0.057221909 |
| Train | 56.36214952 | 0.0017111 |
| Train | 62.67602306 | 0.011741246 |
| Train | 46.1988732 | 7.59509E-05 |
| Train | 56.60512858 | 0.001843213 |
| Train | 51.69694253 | 0.000409799 |
| Train | 46.00034513 | 7.14655E-05 |
| Train | 55.02075268 | 0.001134725 |
| Train | 64.54450118 | 0.020635491 |
| Train | 38.7503994 | 7.73824E-06 |
| Train | 41.43904621 | 1.76477E-05 |
| Train | 79.8278055 | 0.695623248 |
| Train | 65.78680644 | 0.029917027 |
| Train | 62.55417974 | 0.01131554 |
| Train | 63.97225939 | 0.017372155 |
| Train | 43.66368437 | 3.4909E-05 |
| Train | 56.55959296 | 0.001817702 |
| Train | 67.09833115 | 0.044074803 |
| Train | 52.64331842 | 0.000547698 |
| Train | 90.59435432 | 0.984140009 |
| Train | 89.0504202 | 0.974779177 |
| Train | 54.79632368 | 0.001059342 |
| Train | 49.15480004 | 0.000187987 |
| Train | 71.11168228 | 0.136325808 |
| Train | 67.29080433 | 0.046629435 |
| Train | 43.93733262 | 3.79645E-05 |
| Train | 59.5860124 | 0.004585092 |
| Train | 52.12592926 | 0.000467385 |
| Train | 79.57411347 | 0.678906376 |
| Train | 74.76843159 | 0.326325549 |
| Train | 71.61306566 | 0.155459832 |
| Train | 68.45839299 | 0.06539088 |
| Train | 51.84901965 | 0.000429353 |
| Train | 54.63727033 | 0.001008967 |
| Train | 75.65655367 | 0.388761734 |
| Train | 68.08796691 | 0.058782401 |
| Train | 67.72333372 | 0.052892961 |
| Train | 59.35781485 | 0.004276548 |
| Train | 51.50298153 | 0.000386146 |
| Train | 68.49310759 | 0.066044456 |
| Train | 54.04534112 | 0.000841631 |
| Train | 65.93807051 | 0.031292905 |
| Train | 77.1237673 | 0.499345665 |
| Train | 50.75955274 | 0.000307456 |
| Train | 73.84340256 | 0.267273414 |
| Train | 56.56262566 | 0.00181939 |
| Train | 68.29714429 | 0.062433214 |
| Train | 52.17936415 | 0.000475102 |
| Train | 44.15675955 | 4.06067E-05 |
| Train | 43.90448172 | 3.7584E-05 |
| Train | 39.2753105 | 9.08959E-06 |
| Train | 51.07062613 | 0.000338217 |
| Train | 74.03800947 | 0.279120897 |
| Train | 52.58609568 | 0.000538176 |
| Train | 73.69180977 | 0.258269159 |
| Train | 45.67120882 | 6.46053E-05 |
| Train | 53.9189098 | 0.000809653 |
| Train | 76.62177024 | 0.4609426 |
| Train | 43.06689311 | 2.90713E-05 |
| Train | 46.58431325 | 8.54788E-05 |
| Train | 51.24355669 | 0.000356629 |
| Train | 44.70915602 | 4.81014E-05 |
| Train | 59.43902188 | 0.004383903 |
| Train | 77.50890656 | 0.528838108 |
| Train | 68.55511087 | 0.067226893 |
| Train | 77.47493444 | 0.526241705 |
| Train | 66.2597901 | 0.034425696 |
| Train | 50.01718799 | 0.000244877 |
| Train | 48.333519 | 0.000146142 |
| Train | 60.64188796 | 0.006327022 |
| Train | 54.11974604 | 0.000861037 |
| Train | 48.82235875 | 0.000169771 |
| Train | 64.05069344 | 0.01778751 |
| Train | 55.28905978 | 0.001231911 |
| Train | 54.92827403 | 0.001103035 |
| Train | 66.13013124 | 0.033128314 |
| Train | 41.04998483 | 1.56631E-05 |
| Train | 49.94323721 | 0.000239388 |
| Train | 71.52333687 | 0.15188157 |
| Train | 39.78750596 | 1.06354E-05 |
| Train | 47.1500711 | 0.00010167 |
| Train | 60.38169142 | 0.005844661 |
| Train | 74.76470433 | 0.326074334 |
| Train | 55.47676794 | 0.001304803 |
| Train | 58.53918065 | 0.003330332 |
| Train | 83.64121717 | 0.88036351 |
| Train | 51.86544918 | 0.000431521 |
| Train | 44.37185579 | 4.33752E-05 |
| Train | 71.66148279 | 0.157419077 |
| Train | 55.09697013 | 0.001161527 |
| Train | 58.8408117 | 0.003651874 |
| Train | 45.37662953 | 5.90257E-05 |
| Train | 50.25009517 | 0.000263001 |
| Train | 82.37204279 | 0.83295279 |
| Train | 56.70508012 | 0.001900472 |
| Train | 64.72295818 | 0.021770894 |
| Train | 69.844332 | 0.096671737 |
| Train | 64.48113016 | 0.020246427 |
| Train | 56.54308975 | 0.001808543 |
| Train | 75.72470044 | 0.393738667 |
| Train | 51.75639832 | 0.000417336 |
| Train | 70.03537186 | 0.101909572 |
| Train | 41.46403176 | 1.77834E-05 |
| Train | 54.50909897 | 0.000970119 |
| Train | 54.35737346 | 0.000926059 |
| Train | 59.2194442 | 0.00409962 |
| Train | 54.51249601 | 0.000971129 |
| Train | 49.17588637 | 0.000189206 |
| Train | 58.57442581 | 0.003366398 |
| Train | 47.61762965 | 0.000117342 |
| Train | 48.2060655 | 0.000140541 |
| Train | 70.48345021 | 0.115190246 |
| Train | 47.19732156 | 0.000103154 |
| Train | 63.67171004 | 0.015866962 |
| Train | 60.54726818 | 0.006147199 |
| Train | 52.10295818 | 0.000464106 |
| Train | 48.89877426 | 0.000173796 |
| Train | 60.23997403 | 0.005597509 |
| Train | 43.27553023 | 3.09919E-05 |
| Train | 73.52108224 | 0.248367947 |
| Train | 55.84206277 | 0.001459232 |
| Train | 42.85151348 | 2.72134E-05 |
| Train | 61.51900519 | 0.008263398 |
| Train | 52.86513351 | 0.000586224 |
| Train | 49.05003402 | 0.000182045 |
| Train | 52.57946465 | 0.000537084 |
| Train | 46.1111949 | 7.39363E-05 |
| Train | 61.32033467 | 0.007778822 |
| Train | 47.21185497 | 0.000103615 |
| Train | 48.46601052 | 0.000152201 |
| Train | 59.79448561 | 0.004886289 |
| Train | 92.03478376 | 0.989744757 |
| Train | 52.07648394 | 0.000460355 |
| Train | 41.75016823 | 1.94142E-05 |
| Train | 54.64939079 | 0.00101272 |
| Train | 48.82278204 | 0.000169793 |
| Train | 52.00331303 | 0.000450146 |
| Train | 63.28010677 | 0.014096916 |
| Train | 53.30643366 | 0.000671112 |
| Train | 50.09837588 | 0.000251048 |
| Train | 55.03898576 | 0.00114108 |
| Train | 55.04096672 | 0.001141773 |
| Train | 86.36483851 | 0.944330373 |
| Train | 51.23713754 | 0.000355928 |
| Train | 73.11108883 | 0.225647155 |
| Train | 61.08425216 | 0.00723953 |
| Train | 50.87078569 | 0.00031812 |
| Train | 75.02180966 | 0.343630629 |
| Train | 41.02267335 | 1.55324E-05 |
| Train | 41.75941887 | 1.94693E-05 |
| Train | 47.75436514 | 0.000122366 |
| Train | 81.5137436 | 0.793067181 |
| Train | 65.38236905 | 0.026520227 |
| Train | 69.6495763 | 0.091580838 |
| Train | 69.43957855 | 0.086362723 |
| Train | 48.20669934 | 0.000140569 |
| Train | 50.69661638 | 0.000301581 |
| Train | 83.76448538 | 0.884287674 |
| Train | 72.89453371 | 0.214256111 |
| Train | 44.80718112 | 4.95691E-05 |
| Train | 56.17533924 | 0.001615991 |
| Train | 68.45558317 | 0.065338229 |
| Train | 48.13403454 | 0.000137472 |
| Train | 75.15152675 | 0.352657024 |
| Train | 67.55334967 | 0.050341852 |
| Train | 48.13662252 | 0.000137581 |
| Train | 58.06771668 | 0.002883348 |
| Train | 77.24161755 | 0.508379138 |
| Train | 62.22407709 | 0.010237372 |
| Train | 44.81994475 | 4.97635E-05 |
| Train | 72.74055407 | 0.206414528 |
| Train | 39.64165259 | 1.01702E-05 |
| Train | 50.63491638 | 0.00029593 |
| Train | 59.0157588 | 0.003852355 |
| Train | 65.07278975 | 0.024176553 |
| Train | 71.83891092 | 0.164770608 |
| Train | 63.33467715 | 0.014331383 |
| Train | 46.95116428 | 9.5655E-05 |
| Train | 92.08173708 | 0.989889872 |
| Train | 53.23570822 | 0.000656723 |
| Train | 44.15323557 | 4.05629E-05 |
| Train | 49.25739995 | 0.000193994 |
| Train | 54.10351049 | 0.000856765 |
| Train | 73.14671386 | 0.227561698 |
| Train | 47.01290051 | 9.74829E-05 |
| Train | 51.64178251 | 0.000402929 |
| Train | 49.40570617 | 0.000203018 |
| Train | 45.04629429 | 5.334E-05 |
| Train | 49.4331573 | 0.000204734 |
| Train | 54.99171447 | 0.001124678 |
| Train | 60.44734747 | 0.005962815 |
| Train | 44.37837152 | 4.34619E-05 |
| Train | 60.59333892 | 0.006234113 |
| Train | 55.34868163 | 0.001254612 |
| Train | 45.57667998 | 6.27597E-05 |
| Train | 51.91308063 | 0.000437867 |
| Train | 54.89783327 | 0.001092798 |
| Train | 56.93786227 | 0.002040798 |
| Train | 71.04062858 | 0.13378079 |
| Train | 53.31329792 | 0.000672525 |
| Train | 72.92766196 | 0.215971201 |
| Train | 62.54861734 | 0.011296475 |
| Train | 62.5384668 | 0.01126176 |
| Train | 61.37466865 | 0.007908474 |
| Train | 55.54547015 | 0.001332545 |
| Train | 59.24811999 | 0.004135678 |
| Train | 57.27325953 | 0.002261357 |
| Train | 45.90208344 | 6.93445E-05 |
| Train | 54.23212226 | 0.000891198 |
| Train | 64.43592775 | 0.019973289 |
| Train | 57.418472 | 0.002364082 |
| Train | 57.65096673 | 0.002538331 |
| Train | 81.99075739 | 0.816045878 |
| Train | 42.04386489 | 2.12437E-05 |
| Train | 47.93462774 | 0.000129319 |
| Train | 52.8758858 | 0.000588159 |
| Train | 80.97217118 | 0.764488419 |
| Train | 76.85279069 | 0.478585812 |
| Train | 78.84349617 | 0.628249848 |
| Train | 58.75021924 | 0.003552182 |
| Train | 67.48278346 | 0.049317378 |
| Train | 59.07992685 | 0.003928606 |
| Train | 52.01382916 | 0.000451599 |
| Train | 55.80959322 | 0.001444796 |
| Train | 59.46431976 | 0.004417892 |
| Train | 47.22362998 | 0.000103989 |
| Train | 55.70580317 | 0.001399602 |
| Train | 75.8303342 | 0.40149681 |
| Train | 53.39511962 | 0.0006896 |
| Train | 44.58071443 | 4.62439E-05 |
| Train | 49.96476283 | 0.000240973 |
| Train | 71.52041036 | 0.151766105 |
| Train | 64.51580889 | 0.020458442 |
| Train | 54.86450417 | 0.001081698 |
| Train | 80.19636424 | 0.719009922 |
| Train | 55.02503567 | 0.001136215 |
| Train | 58.84424795 | 0.003655711 |
| Train | 70.58251425 | 0.118322685 |
| Train | 67.61547577 | 0.051260427 |
| Train | 55.32166407 | 0.001244274 |
| Train | 44.597082 | 4.64765E-05 |
| Train | 51.48444278 | 0.000383958 |
| Train | 53.26715904 | 0.000663083 |
| Train | 46.99949628 | 9.70831E-05 |
| Train | 48.4384729 | 0.000150921 |
| Train | 61.58963806 | 0.008442798 |
| Train | 78.56915255 | 0.608399995 |
| Train | 51.92777868 | 0.000439844 |
| Train | 53.31062992 | 0.000671975 |
| Train | 49.87522521 | 0.000234448 |
| Train | 47.40138365 | 0.000109814 |
| Train | 55.67111151 | 0.001384813 |
| Train | 41.26224707 | 1.67164E-05 |
| Train | 51.0768625 | 0.000338864 |
| Train | 69.42796857 | 0.08608224 |
| Train | 45.18182835 | 5.56033E-05 |
| Train | 59.39565427 | 0.004326242 |
| Train | 59.97883435 | 0.005168991 |
| Train | 89.11797213 | 0.975283435 |
| Train | 52.14957721 | 0.000470785 |
| Train | 66.62662985 | 0.038367081 |
| Train | 50.59793025 | 0.000292594 |
| Train | 59.89344013 | 0.00503607 |
| Train | 83.02774088 | 0.859091126 |
| Train | 60.35153089 | 0.00579117 |
| Train | 44.60926573 | 4.66505E-05 |
| Train | 52.25230967 | 0.000485844 |
| Train | 46.67104133 | 8.77823E-05 |
| Train | 51.82799893 | 0.000426596 |
| Train | 60.89774629 | 0.006839871 |
| Train | 57.17859273 | 0.002196799 |
| Train | 52.90231098 | 0.000592941 |
| Train | 72.99048226 | 0.219250863 |
| Train | 54.13155136 | 0.000864157 |
| Train | 52.61590915 | 0.000543116 |
| Train | 64.61777009 | 0.021094463 |
| Train | 64.85700745 | 0.022663729 |
| Train | 76.00030474 | 0.414082666 |
| Train | 54.74079205 | 0.001041475 |
| Train | 56.762557 | 0.001934198 |
| Train | 54.82318553 | 0.001068094 |
| Train | 83.08247823 | 0.861110783 |
| Train | 69.59789691 | 0.09027096 |
| Train | 47.70614619 | 0.00012057 |
| Train | 67.46828265 | 0.0491093 |
| Train | 87.08352005 | 0.954843604 |
| Train | 44.6174637 | 4.67679E-05 |
| Train | 68.32773593 | 0.062984571 |
| Train | 56.05415258 | 0.001557134 |
| Train | 53.63577182 | 0.000742373 |
| Train | 50.93641089 | 0.000324584 |
| Train | 54.46899794 | 0.000958274 |
| Train | 46.78344738 | 9.08604E-05 |
| Train | 60.51304351 | 0.006083415 |
| Train | 58.49976852 | 0.003290459 |
| Train | 42.74961285 | 2.63763E-05 |
| Train | 78.21071721 | 0.581925339 |
| Train | 49.03439558 | 0.000181174 |
| Train | 69.47622948 | 0.08725365 |
| Train | 78.51930474 | 0.604752359 |
| Train | 40.31413751 | 1.24993E-05 |
| Train | 47.25343078 | 0.000104944 |
| Train | 52.2155028 | 0.000480394 |
| Train | 39.21263295 | 8.91657E-06 |
| Train | 42.88863986 | 2.7525E-05 |
| Train | 57.64582918 | 0.002534346 |
| Train | 53.81906655 | 0.000785259 |
| Train | 65.29493497 | 0.025836772 |
| Train | 71.3414096 | 0.144834396 |
| Train | 49.9540766 | 0.000240185 |
| Train | 49.84963774 | 0.000232617 |
| Train | 72.51854099 | 0.195485575 |
| Train | 54.18096042 | 0.000877338 |
| Train | 67.85598048 | 0.054967978 |
| Train | 50.36043687 | 0.000272049 |
| Train | 73.21963829 | 0.2315162 |
| Train | 74.99539071 | 0.341805717 |
| Train | 90.06093728 | 0.981374146 |
| Train | 48.2030214 | 0.00014041 |
| Train | 65.55528692 | 0.027924017 |
| Train | 55.18490856 | 0.001193235 |
| Train | 76.28162839 | 0.435155013 |
| Train | 48.00388027 | 0.000132094 |
| Train | 66.87547498 | 0.041283711 |
| Train | 66.26048809 | 0.034432829 |
| Train | 51.25366321 | 0.000357735 |
| Train | 43.75724197 | 3.59249E-05 |
| Train | 93.5088001 | 0.993449536 |
| Train | 73.22891856 | 0.232022915 |
| Train | 53.89956415 | 0.000804868 |
| Train | 69.93592618 | 0.099152335 |
| Train | 71.80262627 | 0.163245059 |
| Train | 79.78051611 | 0.692544241 |
| Train | 60.64193571 | 0.006327111 |
| Train | 67.01619993 | 0.043025812 |
| Train | 55.38512759 | 0.001268694 |
| Train | 53.13678713 | 0.000637115 |
| Train | 43.78667657 | 3.62506E-05 |
| Train | 43.97654543 | 3.84238E-05 |
| Train | 47.05618696 | 9.87853E-05 |
| Train | 47.64076593 | 0.000118177 |
| Train | 47.64290021 | 0.000118254 |
| Train | 62.25445483 | 0.010332189 |
| Train | 40.25406845 | 1.22711E-05 |
| Train | 55.03306408 | 0.001139013 |
| Train | 68.69593416 | 0.06998585 |
| Train | 57.58460248 | 0.002487326 |
| Train | 49.69670669 | 0.000221962 |
| Train | 45.11269737 | 5.44371E-05 |
| Train | 50.23183404 | 0.000261532 |
| Train | 69.02794807 | 0.076909433 |
| Train | 56.14432527 | 0.00160072 |
| Train | 53.81896609 | 0.000785235 |
| Train | 48.1487769 | 0.000138094 |
| Train | 51.46226951 | 0.000381357 |
| Train | 68.25696641 | 0.061715933 |
| Train | 57.1016327 | 0.002145674 |
| Train | 62.54658551 | 0.011289516 |
| Train | 71.95484439 | 0.169721475 |
| Train | 49.55073322 | 0.000212248 |
| Train | 42.62218608 | 2.53655E-05 |
| Train | 58.96974099 | 0.003798584 |
| Train | 58.8055688 | 0.003612766 |
| Train | 45.37615255 | 5.90171E-05 |
| Train | 51.75489402 | 0.000417143 |
| Train | 46.01123739 | 7.17046E-05 |
| Train | 68.80644954 | 0.072223978 |
| Train | 45.71210801 | 6.54206E-05 |
| Train | 60.30758632 | 0.005714102 |
| Train | 59.84925782 | 0.004968639 |
| Train | 65.0907697 | 0.024306969 |
| Train | 57.36813618 | 0.002327957 |
| Train | 50.75581425 | 0.000307103 |
| Train | 68.92227173 | 0.074640223 |
| Train | 50.78373271 | 0.000309743 |
| Train | 60.48792536 | 0.006037021 |
| Train | 49.93643734 | 0.00023889 |
| Train | 66.24125743 | 0.034237313 |
| Train | 75.21569854 | 0.35716211 |
| Train | 50.39118001 | 0.000274625 |
| Train | 46.68143628 | 8.80625E-05 |
| Train | 54.64312354 | 0.001010777 |
| Train | 71.43100023 | 0.148270249 |
| Train | 45.24331305 | 5.66615E-05 |
| Train | 55.03554667 | 0.001139879 |
| Train | 47.26895548 | 0.000105445 |
| Train | 59.61749763 | 0.004629368 |
| Train | 38.26832398 | 6.67489E-06 |
| Train | 45.37033845 | 5.8912E-05 |
| Train | 77.30530396 | 0.513258963 |
| Train | 44.37731965 | 4.34479E-05 |
| Train | 50.55806889 | 0.00028904 |
| Train | 48.19226256 | 0.000139948 |
| Train | 68.51694066 | 0.066496674 |
| Train | 54.87852513 | 0.001086354 |
| Train | 51.38575988 | 0.000372517 |
| Train | 52.82418479 | 0.000578913 |
| Train | 57.4191737 | 0.00236459 |
| Train | 43.9634789 | 3.82701E-05 |
| Train | 43.12503567 | 2.95942E-05 |
| Train | 53.24011909 | 0.000657612 |
| Train | 57.55199331 | 0.00246264 |
| Train | 65.07345949 | 0.024181397 |
| Train | 39.9581208 | 1.12066E-05 |
| Train | 55.93171821 | 0.001499844 |
| Train | 46.9231739 | 9.48376E-05 |
| Train | 56.04259709 | 0.001551635 |
| Train | 68.07921309 | 0.05863405 |
| Train | 68.79346015 | 0.071957552 |
| Train | 66.44681169 | 0.036383733 |
| Train | 40.36359866 | 1.26903E-05 |
| Train | 52.4110116 | 0.000510059 |
| Train | 57.26802827 | 0.002257741 |
| Train | 85.53885751 | 0.929416805 |
| Train | 48.47868509 | 0.000152793 |
| Train | 45.70356873 | 6.52495E-05 |
| Train | 78.92113713 | 0.633792958 |
| Train | 49.52962122 | 0.000210879 |
| Train | 53.79768377 | 0.000780131 |
| Train | 45.76777609 | 6.65468E-05 |
| Train | 56.19420008 | 0.001625349 |
| Train | 67.17681605 | 0.045099978 |
| Train | 59.56748206 | 0.004559231 |
| Train | 49.43870452 | 0.000205082 |
| Train | 57.93393973 | 0.002767783 |
| Train | 42.29880238 | 2.2971E-05 |
| Train | 72.09853321 | 0.176020907 |
| Train | 64.78371921 | 0.022171251 |
| Train | 55.50757427 | 0.001317171 |
| Train | 63.63893153 | 0.015710781 |
| Train | 39.96242364 | 1.12214E-05 |
| Train | 79.02131439 | 0.640892848 |
| Train | 62.95979513 | 0.012795025 |
| Train | 48.8396633 | 0.000170674 |
| Train | 68.91663521 | 0.074520936 |
| Train | 49.50020159 | 0.000208986 |
| Train | 57.90894469 | 0.002746709 |
| Train | 66.39368802 | 0.035816895 |
| Train | 42.9455225 | 2.80093E-05 |
| Train | 63.00618355 | 0.012975946 |
| Train | 82.06851492 | 0.819598083 |
| Train | 48.45247295 | 0.00015157 |
| Train | 50.66273723 | 0.000298465 |
| Train | 57.1621021 | 0.002185743 |
| Train | 73.60965662 | 0.253472787 |
| Train | 44.1818938 | 4.09209E-05 |
| Train | 97.21862709 | 0.997890554 |
| Train | 78.86604941 | 0.629863532 |
| Train | 76.8376049 | 0.47742395 |
| Train | 82.45148181 | 0.836314721 |
| Train | 73.05023237 | 0.222403264 |
| Train | 73.00154864 | 0.219832437 |
| Train | 51.47161665 | 0.000382451 |
| Train | 44.37500408 | 4.34171E-05 |
| Train | 59.41565043 | 0.004352735 |
| Train | 52.22013993 | 0.000481077 |
| Train | 46.4830554 | 8.28657E-05 |
| Train | 70.01446127 | 0.101324219 |
| Train | 58.92762637 | 0.003750026 |
| Train | 38.41610239 | 6.98432E-06 |
| Train | 52.32560194 | 0.000496881 |
| Train | 41.41965012 | 1.7543E-05 |
| Train | 70.30350073 | 0.10968464 |
| Train | 56.01685084 | 0.001539452 |
| Train | 45.98002647 | 7.10217E-05 |
| Train | 64.01275047 | 0.017585378 |
| Train | 48.55930282 | 0.000156617 |
| Train | 61.83219632 | 0.009088768 |
| Train | 49.88657056 | 0.000235265 |
| Train | 56.98109709 | 0.002067978 |
| Train | 77.3354104 | 0.51556503 |
| Train | 47.23273073 | 0.00010428 |
| Train | 44.6378775 | 4.70615E-05 |
| Train | 53.21272829 | 0.000652115 |
| Train | 55.923908 | 0.001496262 |
| Train | 80.81235359 | 0.755551106 |
| Train | 86.97552561 | 0.953394047 |
| Train | 57.08557901 | 0.00213516 |
| Train | 39.29475493 | 9.14395E-06 |
| Train | 65.9242744 | 0.031164925 |
| Train | 60.8137234 | 0.006667058 |
| Train | 83.74246991 | 0.88359513 |
| Train | 85.01560573 | 0.918138219 |
| Train | 45.53546721 | 6.19716E-05 |
| Train | 55.16794417 | 0.001187052 |
| Train | 61.53804293 | 0.008311376 |
| Train | 53.16305221 | 0.000642263 |
| Train | 66.87442315 | 0.041270948 |
| Train | 48.31460473 | 0.000145297 |
| Train | 47.84500483 | 0.000125814 |
| Train | 44.60142737 | 4.65385E-05 |
| Train | 56.14084649 | 0.001599016 |
| Train | 39.73693717 | 1.04717E-05 |
| Train | 57.59477441 | 0.002495077 |
| Train | 58.56491563 | 0.003356629 |
| Train | 65.95323541 | 0.031434196 |
| Train | 49.31695273 | 0.000197568 |
| Train | 44.27081905 | 4.2052E-05 |
| Train | 51.77717228 | 0.000420001 |
| Train | 51.67506799 | 0.000407061 |
| Train | 51.3547018 | 0.000368988 |
| Train | 75.29642888 | 0.362865583 |
| Train | 61.64919863 | 0.008597069 |
| Train | 63.76531369 | 0.016321449 |
| Train | 58.19703647 | 0.002999632 |
| Train | 65.8090767 | 0.030115844 |
| Train | 81.0624943 | 0.769438667 |
| Train | 59.43818835 | 0.004382788 |
| Train | 68.72847653 | 0.070638167 |
| Train | 43.99120139 | 3.85968E-05 |
| Train | 74.08871129 | 0.282259892 |
| Train | 51.68230957 | 0.000407965 |
| Train | 65.40493319 | 0.026699434 |
| Train | 51.47210341 | 0.000382508 |
| Train | 53.72380364 | 0.00076267 |
| Train | 77.06479023 | 0.49482453 |
| Train | 49.21652019 | 0.000191578 |
| Train | 76.73901819 | 0.469887495 |
| Train | 68.174681 | 0.060270902 |
| Train | 66.20210058 | 0.033842509 |
| Train | 70.19697375 | 0.10653514 |
| Train | 59.28732641 | 0.004185487 |
| Train | 75.06638012 | 0.346719717 |
| Train | 63.51728867 | 0.01514427 |
| Train | 47.22554962 | 0.00010405 |
| Train | 71.59672689 | 0.154803188 |
| Train | 59.54629069 | 0.004529834 |
| Train | 57.34490637 | 0.002311473 |
| Train | 58.22848428 | 0.003028609 |
| Train | 42.47237726 | 2.42267E-05 |
| Train | 52.35845579 | 0.000501909 |
| Train | 57.3981137 | 0.002349405 |
| Train | 51.70679314 | 0.000411038 |
| Train | 48.2280412 | 0.000141492 |
| Train | 57.79334147 | 0.002651302 |
| Train | 60.59055865 | 0.006228833 |
| Train | 72.624735 | 0.200657642 |
| Train | 55.04000969 | 0.001141438 |
| Train | 66.01706333 | 0.032035561 |
| Train | 39.02873211 | 8.42767E-06 |
| Train | 59.15305542 | 0.004017338 |
| Train | 59.20543708 | 0.004082121 |
| Train | 62.68755817 | 0.01178236 |
| Train | 75.07837502 | 0.347553339 |
| Train | 59.06628592 | 0.003912272 |
| Train | 69.74392483 | 0.094016285 |
| Train | 53.41699691 | 0.000694238 |
| Train | 52.21068599 | 0.000479685 |
| Train | 45.33844376 | 5.83386E-05 |
| Train | 44.64863911 | 4.72171E-05 |
| Train | 53.76501157 | 0.000772361 |
| Train | 61.83852192 | 0.009106257 |
| Train | 55.5974241 | 0.001353915 |
| Train | 58.02851788 | 0.002848996 |
| Train | 42.48137622 | 2.42936E-05 |
| Train | 64.66716239 | 0.021409501 |
| Train | 70.83999608 | 0.126810676 |
| Train | 60.98764821 | 0.007029709 |
| Train | 60.60342863 | 0.006253309 |
| Train | 63.21792086 | 0.013834342 |
| Train | 48.40038275 | 0.000149169 |
| Train | 62.82307859 | 0.012276166 |
| Train | 101.1629027 | 0.999369698 |
| Train | 76.94560562 | 0.485691866 |
| Train | 46.04477006 | 7.24457E-05 |
| Train | 53.84897061 | 0.000792487 |
| Train | 40.38334254 | 1.27673E-05 |
| Train | 59.63661624 | 0.004656461 |
| Train | 67.92290086 | 0.056043748 |
| Train | 84.22201489 | 0.897887589 |
| Train | 67.06299024 | 0.043620478 |
| Train | 88.76681381 | 0.972550571 |
| Train | 51.11242515 | 0.000342578 |
| Train | 42.84036436 | 2.71205E-05 |
| Train | 86.60981174 | 0.948150059 |
| Train | 52.90205317 | 0.000592894 |
| Train | 57.67458307 | 0.002556733 |
| Train | 55.4518145 | 0.00129487 |
| Train | 72.04941757 | 0.173847167 |
| Train | 46.3225004 | 7.88851E-05 |
| Train | 46.87505907 | 9.34488E-05 |
| Train | 50.18762142 | 0.000258012 |
| Train | 50.09966578 | 0.000251148 |
| Train | 46.2972961 | 7.82779E-05 |
| Train | 45.01254705 | 5.27909E-05 |
| Train | 95.45919819 | 0.996387417 |
| Train | 50.15088088 | 0.000255122 |
| Train | 80.29319176 | 0.72496954 |
| Train | 53.39668108 | 0.00068993 |
| Train | 51.55706352 | 0.0003926 |
| Train | 41.23146237 | 1.65594E-05 |
| Train | 90.65799009 | 0.984441718 |
| Train | 77.0504487 | 0.493725448 |
| Train | 56.56700591 | 0.001821831 |
| Train | 52.74208016 | 0.000564528 |
| Train | 49.26686599 | 0.000194558 |
| Train | 68.77405369 | 0.07156117 |
| Train | 62.47114832 | 0.011034215 |
| Train | 45.99281281 | 7.13007E-05 |
| Train | 65.45813067 | 0.027126619 |
| Train | 86.11738798 | 0.94020429 |
| Train | 50.92702461 | 0.000323652 |
| Train | 43.44149519 | 3.26099E-05 |
| Train | 57.03296428 | 0.002101061 |
| Train | 59.53029692 | 0.004507774 |
| Train | 63.49525673 | 0.015043838 |
| Train | 54.23285426 | 0.000891398 |
| Train | 56.48436898 | 0.001776327 |
| Train | 53.0243179 | 0.00061553 |
| Train | 60.58185592 | 0.006212336 |
| Train | 54.21152548 | 0.000885592 |
| Train | 48.40527077 | 0.000149393 |
| Train | 58.4545246 | 0.003245271 |
| Train | 46.96565085 | 9.60808E-05 |
| Train | 80.28972251 | 0.724757208 |
| Train | 74.48604476 | 0.307583321 |
| Train | 48.32716057 | 0.000145857 |
| Train | 71.97643294 | 0.170656306 |
| Train | 71.46981836 | 0.14977978 |
| Train | 42.63789769 | 2.5488E-05 |
| Train | 44.16753764 | 4.07411E-05 |
| Train | 75.90539849 | 0.407040134 |
| Train | 61.18019073 | 0.007454057 |
| Train | 77.17354572 | 0.503161593 |
| Train | 62.52858768 | 0.011228082 |
| Train | 41.98922815 | 2.08908E-05 |
| Train | 48.78357738 | 0.000167765 |
| Train | 48.518914 | 0.000154689 |
| Train | 52.55960584 | 0.000533825 |
| Train | 83.48541618 | 0.875239588 |
| Train | 57.11100058 | 0.002151834 |
| Train | 69.76011997 | 0.09444012 |
| Train | 48.44191046 | 0.00015108 |
| Train | 51.49420798 | 0.000385109 |
| Train | 40.17449209 | 1.19753E-05 |
| Train | 54.94647333 | 0.001109201 |
| Train | 36.44206097 | 3.81277E-06 |
| Train | 55.4011475 | 0.001274933 |
| Train | 66.2864624 | 0.034698608 |
| Train | 46.68338958 | 8.81152E-05 |
| Train | 54.98011825 | 0.00112069 |
| Train | 43.40497225 | 3.22467E-05 |
| Train | 56.79762325 | 0.001955067 |
| Train | 44.45080065 | 4.4438E-05 |
| Train | 72.70680898 | 0.204724659 |
| Train | 63.36087373 | 0.0144453 |
| Train | 57.82571465 | 0.002677682 |
| Train | 57.44935641 | 0.002386524 |
| Train | 50.24703708 | 0.000262754 |
| Train | 73.23749298 | 0.232491739 |
| Train | 80.73007134 | 0.750861146 |
| Train | 62.57808198 | 0.01139783 |
| Train | 68.31834074 | 0.062814786 |
| Train | 76.89915145 | 0.482134337 |
| Train | 52.14377144 | 0.000469948 |
| Train | 60.67852783 | 0.006398051 |
| Train | 52.2216434 | 0.000481299 |
| Train | 76.78769089 | 0.473606811 |
| Train | 60.62210843 | 0.006289002 |
| Train | 53.60833165 | 0.000736157 |
| Train | 54.92848585 | 0.001103106 |
| Train | 66.59248505 | 0.037982651 |
| Train | 48.70548926 | 0.000163796 |
| Train | 57.45707605 | 0.002392166 |
| Train | 72.56164305 | 0.197572595 |
| Train | 61.87083121 | 0.009196087 |
| Train | 46.98546456 | 9.66663E-05 |
| Train | 49.93610107 | 0.000238865 |
| Train | 56.60580636 | 0.001843596 |
| Train | 48.84288645 | 0.000170843 |
| Train | 48.56799021 | 0.000157035 |
| Train | 43.03673627 | 2.88037E-05 |
| Train | 65.58878057 | 0.028204177 |
| Train | 54.54956573 | 0.00098222 |
| Train | 50.40513366 | 0.000275802 |
| Train | 93.08585119 | 0.992549199 |
| Train | 50.75076968 | 0.000306629 |
| Train | 49.20547595 | 0.00019093 |
| Train | 52.8671484 | 0.000586586 |
| Train | 45.21286312 | 5.6135E-05 |
| Train | 56.42331179 | 0.001743437 |
| Train | 65.85522614 | 0.030531952 |
| Train | 45.06563527 | 5.36572E-05 |
| Train | 60.90477267 | 0.006854525 |
| Train | 48.5985721 | 0.000158514 |
| Train | 48.76211685 | 0.000166664 |
| Train | 53.05872275 | 0.000622054 |
| Train | 54.28773441 | 0.000906512 |
| Train | 45.68940637 | 6.49668E-05 |
| Train | 47.30600397 | 0.000106649 |
| Train | 72.53915922 | 0.196481819 |
| Train | 44.99594255 | 5.25228E-05 |
| Train | 55.29528213 | 0.001234261 |
| Train | 49.44917691 | 0.000205742 |
| Train | 64.08775447 | 0.017987155 |
| Train | 46.8129282 | 9.16854E-05 |
| Train | 65.2271563 | 0.025318791 |
| Train | 57.71823277 | 0.002591094 |
| Train | 54.08693194 | 0.000852424 |
| Train | 64.60686792 | 0.021025546 |
| Train | 44.84765176 | 5.01881E-05 |
| Train | 53.39737555 | 0.000690077 |
| Train | 56.65245118 | 0.001870104 |
| Train | 55.29882528 | 0.001235601 |
| Train | 58.78441289 | 0.003589488 |
| Train | 47.11410849 | 0.000100555 |
| Train | 66.79900753 | 0.040365579 |
| Train | 34.63418124 | 2.1902E-06 |
| Train | 52.26082928 | 0.000487114 |
| Train | 51.78204068 | 0.000420629 |
| Train | 50.56539956 | 0.000289691 |
| Train | 54.62934463 | 0.00100652 |
| Train | 47.69566543 | 0.000120183 |
| Train | 52.84177218 | 0.000582042 |
| Train | 44.74269564 | 4.85986E-05 |
| Train | 60.32064428 | 0.005736896 |
| Train | 61.48925114 | 0.008188964 |
| Train | 77.09224866 | 0.496929487 |
| Train | 54.61347721 | 0.001001639 |
| Train | 48.3409057 | 0.000146473 |
| Train | 59.21383311 | 0.004092601 |
| Train | 65.55641437 | 0.027933411 |
| Train | 51.190366 | 0.000350861 |
| Train | 48.60991123 | 0.000159066 |
| Train | 52.90194591 | 0.000592875 |
| Train | 71.14290294 | 0.137456992 |
| Train | 50.60102509 | 0.000292872 |
| Train | 56.31572112 | 0.001686953 |
| Train | 51.97235872 | 0.000445895 |
| Train | 66.52987228 | 0.037287304 |
| Train | 46.2831252 | 7.79385E-05 |
| Train | 56.2393378 | 0.001647964 |
| Train | 59.54280492 | 0.004525018 |
| Train | 47.67808673 | 0.000119537 |
| Train | 52.41527812 | 0.000510727 |
| Train | 66.88368156 | 0.041383419 |
| Train | 55.49840456 | 0.001313477 |
| Train | 64.3362746 | 0.019383848 |
| Train | 49.94154083 | 0.000239264 |
| Train | 54.55736865 | 0.000984571 |
| Train | 65.73375115 | 0.029448471 |
| Train | 63.45228607 | 0.014849832 |
| Train | 65.51405669 | 0.027582882 |
| Train | 45.84702643 | 6.81837E-05 |
| Train | 69.21298623 | 0.081035585 |
| Train | 68.38519601 | 0.064032469 |
| Train | 42.08260151 | 2.14975E-05 |
| Train | 92.07393396 | 0.989865896 |
| Train | 67.49080831 | 0.049432867 |
| Train | 63.42517782 | 0.014728725 |
| Train | 52.3363705 | 0.000498523 |
| Train | 55.95626658 | 0.00151116 |
| Train | 51.89516848 | 0.00043547 |
| Train | 62.10465255 | 0.009872895 |
| Train | 58.29392432 | 0.003089807 |
| Train | 52.71418737 | 0.000559723 |
| Train | 64.38793286 | 0.019687234 |
| Train | 60.84595436 | 0.006732832 |
| Train | 47.03467623 | 9.81359E-05 |
| Train | 57.8535686 | 0.002700588 |
| Train | 42.80859488 | 2.68576E-05 |
| Train | 59.10121537 | 0.003954234 |
| Train | 62.73902155 | 0.011967526 |
| Train | 69.86347174 | 0.097185456 |
| Train | 62.11714552 | 0.009910414 |
| Train | 70.84528876 | 0.126990483 |
| Train | 87.71801077 | 0.962528191 |
| Train | 58.01329066 | 0.002835762 |
| Train | 50.64920545 | 0.000297229 |
| Train | 57.94260844 | 0.00277513 |
| Train | 65.84626818 | 0.03045075 |
| Train | 80.42354223 | 0.732866865 |
| Train | 61.88552177 | 0.009237225 |
| Train | 60.47450666 | 0.006012381 |
| Train | 65.78373097 | 0.029889671 |
| Train | 56.81617653 | 0.001966199 |
| Train | 47.05065777 | 9.8618E-05 |
| Train | 44.91999472 | 5.13138E-05 |
| Train | 61.94640204 | 0.009409644 |
| Train | 48.12106506 | 0.000136926 |
| Train | 51.62353448 | 0.000400681 |
| Train | 45.817545 | 6.75701E-05 |
| Train | 53.15479348 | 0.00064064 |
| Train | 65.73398685 | 0.029450545 |
| Train | 69.62409409 | 0.090932838 |
| Train | 40.96416977 | 1.52563E-05 |
| Train | 51.22569265 | 0.000354681 |
| Train | 55.98254133 | 0.001523366 |
| Train | 56.88872985 | 0.002010344 |
| Train | 62.97889791 | 0.012869227 |
| Train | 74.54895767 | 0.311707175 |
| Train | 57.73252256 | 0.002602443 |
| Train | 47.03275406 | 9.80781E-05 |
| Train | 50.61380467 | 0.000294021 |
| Train | 68.72112865 | 0.070490364 |
| Train | 62.80020589 | 0.012191404 |
| Train | 41.16370981 | 1.62189E-05 |
| Train | 45.39723695 | 5.93999E-05 |
| Train | 55.33469044 | 0.001249247 |
| Train | 48.1804822 | 0.000139443 |
| Train | 55.1784008 | 0.00119086 |
| Train | 48.51448862 | 0.00015448 |
| Train | 47.52409474 | 0.000114024 |
| Train | 50.7196775 | 0.00030372 |
| Train | 67.51299876 | 0.049753577 |
| Train | 52.22597629 | 0.000481938 |
| Train | 40.96927254 | 1.52802E-05 |
| Train | 50.7112996 | 0.000302941 |
| Train | 43.88108918 | 3.73154E-05 |
| Train | 49.09580084 | 0.000184617 |
| Train | 74.17196109 | 0.287460088 |
| Train | 57.72959582 | 0.002600114 |
| Train | 68.50327013 | 0.066236926 |
| Train | 57.97368104 | 0.002801624 |
| Train | 49.95782601 | 0.000240461 |
| Train | 66.50741579 | 0.037040893 |
| Train | 52.02304958 | 0.000452877 |
| Train | 51.42717646 | 0.000377277 |
| Train | 49.50450567 | 0.000209261 |
| Train | 54.28486781 | 0.000905716 |
| Train | 54.04416885 | 0.000841329 |
| Train | 55.1664275 | 0.001186501 |
| Train | 45.36248929 | 5.87704E-05 |
| Train | 49.26636675 | 0.000194528 |
| Train | 40.8008659 | 1.45111E-05 |
| Train | 48.75351836 | 0.000166226 |
| Train | 61.5634677 | 0.008375883 |
| Train | 77.75086763 | 0.547277105 |
| Train | 74.1178703 | 0.284074823 |
| Train | 54.99164221 | 0.001124653 |
| Train | 52.08636284 | 0.000461751 |
| Train | 53.9845301 | 0.000826096 |
| Train | 53.25785545 | 0.000661196 |
| Train | 48.22719031 | 0.000141455 |
| Train | 75.42821559 | 0.372259187 |
| Train | 60.17144847 | 0.005481757 |
| Train | 51.85819455 | 0.000430562 |
| Train | 44.78135233 | 4.91781E-05 |
| Train | 43.04201842 | 2.88504E-05 |
| Train | 53.92440457 | 0.000811017 |
| Train | 55.30618804 | 0.00123839 |
| Train | 58.53695274 | 0.003328064 |
| Train | 59.5479872 | 0.004532182 |
| Train | 63.1995034 | 0.013757499 |
| Train | 50.20680754 | 0.000259534 |
| Train | 54.92259078 | 0.001101116 |
| Train | 46.0753019 | 7.3127E-05 |
| Train | 47.13775849 | 0.000101287 |
| Train | 70.05883463 | 0.102569937 |
| Train | 67.90127579 | 0.05569395 |
| Train | 51.11446365 | 0.000342792 |
| Train | 53.99449299 | 0.000828621 |
| Train | 59.35389745 | 0.004271436 |
| Train | 43.61249926 | 3.43654E-05 |
| Train | 41.48873896 | 1.79186E-05 |
| Train | 81.39937851 | 0.787252842 |
| Train | 83.26852416 | 0.867794231 |
| Train | 74.50414652 | 0.308766676 |
| Train | 50.32209613 | 0.00026887 |
| Train | 46.99972612 | 9.70899E-05 |
| Train | 84.7476667 | 0.911747 |
| Train | 63.5739746 | 0.015405714 |
| Train | 73.06974019 | 0.22343952 |
| Train | 52.83409809 | 0.000580675 |
| Train | 60.17800489 | 0.005492728 |
| Train | 51.09013807 | 0.000340246 |
| Train | 51.20173449 | 0.000352086 |
| Train | 70.4936474 | 0.115509337 |
| Train | 47.00545298 | 9.72605E-05 |
| Train | 55.83666935 | 0.001456824 |
| Train | 57.05555854 | 0.002115638 |
| Train | 64.29650038 | 0.019153366 |
| Train | 60.00478913 | 0.005210078 |
| Train | 57.11382259 | 0.002153692 |
| Train | 45.7482571 | 6.61497E-05 |
| Train | 48.5183953 | 0.000154665 |
| Train | 68.76003079 | 0.071275999 |
| Train | 43.62961124 | 3.45462E-05 |
| Train | 63.81461729 | 0.016565949 |
| Train | 85.70159993 | 0.932621092 |
| Train | 69.82419888 | 0.096133957 |
| Train | 45.63832202 | 6.39571E-05 |
| Train | 77.46469424 | 0.525458871 |
| Train | 48.08915243 | 0.000135593 |
| Train | 78.8385502 | 0.62789553 |
| Train | 58.56941934 | 0.003361252 |
| Train | 47.83714328 | 0.000125511 |
| Train | 43.67316397 | 3.50106E-05 |
| Train | 73.09116155 | 0.224581304 |
| Train | 57.33797381 | 0.002306575 |
| Train | 55.21632141 | 0.001204771 |
| Train | 54.13020341 | 0.0008638 |
| Train | 69.60086072 | 0.090345589 |
| Train | 50.849054 | 0.000316008 |
| Train | 47.26714348 | 0.000105386 |
| Train | 44.63919709 | 4.70806E-05 |
| Train | 60.85205714 | 0.006745358 |
| Train | 59.98292472 | 0.005175444 |
| Train | 53.3680615 | 0.000683906 |
| Train | 43.76046387 | 3.59604E-05 |
| Train | 41.96871637 | 2.07598E-05 |
| Train | 54.10304432 | 0.000856643 |
| Train | 50.12780266 | 0.000253323 |
| Train | 90.80635856 | 0.985123395 |
| Train | 67.81851494 | 0.054374247 |
| Train | 72.58524201 | 0.198722314 |
| Train | 51.40567344 | 0.000374798 |
| Train | 51.0797396 | 0.000339163 |
| Train | 53.10288896 | 0.000630531 |
| Train | 45.51172778 | 6.15221E-05 |
| Train | 52.43310467 | 0.000513525 |
| Train | 65.54235001 | 0.027816557 |
| Train | 60.9997113 | 0.007055574 |
| Train | 64.30667453 | 0.019212064 |
| Train | 46.40170962 | 8.08244E-05 |
| Train | 69.56166794 | 0.089362787 |
| Train | 54.13922532 | 0.000866191 |
| Train | 49.23602161 | 0.000192727 |
| Train | 56.98673936 | 0.002071551 |
| Train | 57.25692021 | 0.002250081 |
| Train | 74.04987621 | 0.279853679 |
| Train | 59.55306292 | 0.00453921 |
| Train | 81.12177682 | 0.772647639 |
| Train | 46.80678931 | 9.1513E-05 |
| Train | 61.56248576 | 0.008373381 |
| Train | 76.63357766 | 0.461842339 |
| Train | 62.67247645 | 0.011728637 |
| Train | 60.92289811 | 0.006892463 |
| Train | 67.2503283 | 0.04608078 |
| Train | 53.20295976 | 0.000650166 |
| Train | 62.70384221 | 0.011840642 |
| Train | 77.88252701 | 0.557259384 |
| Train | 77.54917887 | 0.531913909 |
| Train | 55.37262441 | 0.001263845 |
| Train | 63.66209413 | 0.015820985 |
| Train | 36.65598106 | 4.07125E-06 |
| Train | 79.8386967 | 0.696329922 |
| Train | 51.28241125 | 0.000360902 |
| Train | 42.56458564 | 2.49215E-05 |
| Train | 97.69281704 | 0.9981755 |
| Train | 82.82325102 | 0.851328346 |
| Train | 76.82555853 | 0.476502487 |
| Train | 74.46061679 | 0.305925194 |
| Train | 79.52087698 | 0.675337395 |
| Train | 57.66113476 | 0.002546238 |
| Train | 54.41183005 | 0.000941638 |
| Train | 84.92797579 | 0.91609578 |
| Train | 49.31633272 | 0.000197531 |
| Train | 44.68179271 | 4.76995E-05 |
| Train | 66.20878361 | 0.033909571 |
| Train | 50.77378989 | 0.0003088 |
| Train | 73.47766943 | 0.245891163 |
| Train | 59.21096581 | 0.004089019 |
| Train | 53.65388708 | 0.000746505 |
| Train | 48.37074549 | 0.00014782 |
| Train | 46.99940676 | 9.70804E-05 |
| Train | 44.66054224 | 4.73897E-05 |
| Train | 53.16140867 | 0.00064194 |
| Train | 42.83562216 | 2.70811E-05 |
| Train | 54.22802165 | 0.000890079 |
| Train | 45.83381228 | 6.7908E-05 |
| Train | 58.77443377 | 0.003578559 |
| Train | 56.94530547 | 0.002045452 |
| Train | 65.55347327 | 0.027908935 |
| Train | 69.34181784 | 0.084026577 |
| Train | 40.42867556 | 1.29461E-05 |
| Train | 66.10397136 | 0.032872335 |
| Train | 59.40391155 | 0.004337162 |
| Train | 60.07639312 | 0.005325122 |
| Train | 49.96083657 | 0.000240683 |
| Train | 39.10781681 | 8.63454E-06 |
| Train | 77.51551025 | 0.529342574 |
| Train | 79.04922308 | 0.642860079 |
| Train | 40.75297334 | 1.42996E-05 |
| Train | 76.21909399 | 0.430447821 |
| Train | 46.31378304 | 7.86746E-05 |
| Train | 55.53243935 | 0.001327238 |
| Train | 53.3626046 | 0.000682763 |
| Train | 58.67277071 | 0.003469105 |
| Train | 56.964882 | 0.002057742 |
| Train | 74.08662278 | 0.282130147 |
| Train | 50.81907373 | 0.000313117 |
| Train | 44.83317133 | 4.99657E-05 |
| Train | 43.53806195 | 3.35899E-05 |
| Train | 43.37946734 | 3.19955E-05 |
| Train | 48.25059925 | 0.000142474 |
| Train | 47.48493718 | 0.000112664 |
| Train | 53.87999441 | 0.000800056 |
| Train | 60.30588736 | 0.005711142 |
| Train | 60.50899539 | 0.006075914 |
| Train | 45.4909774 | 6.11319E-05 |
| Train | 41.60588554 | 1.8574E-05 |
| Train | 70.09927858 | 0.103717127 |
| Train | 86.266298 | 0.942720362 |
| Train | 57.8683776 | 0.002712846 |
| Train | 48.61445897 | 0.000159288 |
| Train | 49.60330615 | 0.000215697 |
| Train | 48.34619215 | 0.000146711 |
| Train | 44.21168445 | 4.12964E-05 |
| Train | 53.95585415 | 0.000818869 |
| Train | 46.95660701 | 9.58148E-05 |
| Train | 63.1999898 | 0.013759527 |
| Train | 55.80745663 | 0.001443852 |
| Train | 66.28648433 | 0.034698838 |
| Train | 56.23144082 | 0.001643985 |
| Train | 81.59869182 | 0.797309365 |
| Train | 60.16255592 | 0.005466911 |
| Train | 50.04184119 | 0.000246735 |
| Train | 57.75325162 | 0.002618994 |
| Train | 50.98010082 | 0.00032896 |
| Train | 47.24613342 | 0.000104709 |
| Train | 62.52174037 | 0.011204792 |
| Train | 76.59330002 | 0.45877419 |
| Train | 51.63009841 | 0.000401488 |
| Train | 57.9270905 | 0.002761993 |
| Train | 48.76750117 | 0.00016694 |
| Train | 68.29221495 | 0.062344791 |
| Train | 57.53495979 | 0.002449842 |
| Train | 49.33314196 | 0.000198551 |
| Train | 44.44192106 | 4.43171E-05 |
| Train | 60.27750215 | 0.005661928 |
| Train | 74.6846378 | 0.320702352 |
| Train | 58.37939438 | 0.003171596 |
| Train | 46.10618941 | 7.38229E-05 |
| Train | 53.17511356 | 0.000644642 |
| Train | 66.80777386 | 0.040469828 |
| Train | 43.27096773 | 3.09486E-05 |
| Train | 43.91481173 | 3.77033E-05 |
| Train | 72.12561386 | 0.177228618 |
| Train | 61.2553802 | 0.007626588 |
| Train | 62.65348146 | 0.011661313 |
| Train | 54.36204398 | 0.000927385 |
| Train | 88.24377683 | 0.967928589 |
| Train | 72.44821062 | 0.19211614 |
| Train | 57.31820956 | 0.00229267 |
| Train | 85.05060308 | 0.918941187 |
| Train | 52.30373075 | 0.000493561 |
| Train | 53.72839568 | 0.000763744 |
| Train | 46.17616569 | 7.54239E-05 |
| Train | 53.76496569 | 0.00077235 |
| Train | 49.11488639 | 0.000185701 |
| Train | 57.506192 | 0.002428378 |
| Train | 79.61391568 | 0.681561102 |
| Train | 61.76391501 | 0.008902125 |
| Train | 55.9356438 | 0.001501648 |
| Train | 50.56022758 | 0.000289232 |
| Train | 50.23533871 | 0.000261814 |
| Train | 55.0643803 | 0.00114999 |
| Train | 66.93127127 | 0.041966196 |
| Train | 57.13867656 | 0.002170133 |
| Train | 41.27570516 | 1.67856E-05 |
| Train | 79.85778522 | 0.697566165 |
| Train | 53.16480546 | 0.000642609 |
| Train | 79.64062708 | 0.683336186 |
| Train | 63.80745285 | 0.016530207 |
| Train | 76.70773376 | 0.467498637 |
| Train | 55.61921309 | 0.001362979 |
| Train | 60.92482396 | 0.006896508 |
| Train | 73.79976077 | 0.26466089 |
| Train | 77.08596698 | 0.49644798 |
| Train | 51.68783953 | 0.000408657 |
| Train | 56.69778677 | 0.001896234 |
| Train | 62.13169903 | 0.009954297 |
| Train | 54.62579768 | 0.001005427 |
| Train | 46.94909501 | 9.55943E-05 |
| Train | 50.55506195 | 0.000288774 |
| Train | 49.35075751 | 0.000199627 |
| Train | 49.10814283 | 0.000185317 |
| Train | 53.20262298 | 0.000650099 |
| Train | 54.09371299 | 0.000854197 |
| Train | 54.72141181 | 0.00103531 |
| Train | 71.59584888 | 0.154767958 |
| Train | 56.59655661 | 0.001838384 |
| Train | 70.70106902 | 0.122168081 |
| Train | 62.02008316 | 0.009622593 |
| Train | 47.55194245 | 0.000115002 |
| Train | 48.03854897 | 0.000133506 |
| Train | 61.96777836 | 0.009470943 |
| Train | 58.38195766 | 0.003174082 |
| Train | 83.28557535 | 0.868392914 |
| Train | 73.09766499 | 0.224928801 |
| Train | 51.49783092 | 0.000385537 |
| Train | 38.93199841 | 8.18136E-06 |
| Train | 53.5714057 | 0.000727875 |
| Train | 61.75048907 | 0.008865877 |
| Train | 45.05547842 | 5.34904E-05 |
| Train | 80.29088314 | 0.724828141 |
| Train | 45.09448142 | 5.41339E-05 |
| Train | 58.02142499 | 0.002842824 |
| Train | 52.10140018 | 0.000463884 |
| Train | 69.34290164 | 0.084052142 |
| Train | 80.6755099 | 0.747718253 |
| Train | 53.76998739 | 0.000773539 |
| Train | 57.09122896 | 0.002138855 |
| Train | 83.11300054 | 0.862226311 |
| Train | 62.058948 | 0.009736834 |
| Train | 49.08311808 | 0.000183901 |
| Train | 42.75061561 | 2.63844E-05 |
| Train | 55.25279589 | 0.001218305 |
| Train | 60.8181752 | 0.006676104 |
| Train | 60.61011208 | 0.006266057 |
| Train | 56.59152088 | 0.001835552 |
| Train | 49.628623 | 0.000217377 |
| Train | 68.97029978 | 0.075663809 |
| Train | 38.25147022 | 6.64048E-06 |
| Train | 50.09559945 | 0.000250835 |
| Train | 54.96682082 | 0.001116135 |
| Train | 62.53570808 | 0.011252351 |
| Train | 64.40056892 | 0.019762157 |
| Train | 48.05683117 | 0.000134256 |
| Train | 54.84665646 | 0.001075801 |
| Train | 51.75599741 | 0.000417284 |
| Train | 47.66062907 | 0.000118899 |
| Train | 44.7146349 | 4.81823E-05 |
| Train | 55.74682514 | 0.001417293 |
| Train | 68.95852407 | 0.07541166 |
| Train | 56.09046851 | 0.001574543 |
| Train | 65.16979566 | 0.02488835 |
| Train | 79.71943918 | 0.688542244 |
| Train | 54.93658452 | 0.001105846 |
| Train | 68.02025585 | 0.057644127 |
| Train | 53.985395 | 0.000826314 |
| Train | 64.03158062 | 0.017685407 |
| Train | 46.65174841 | 8.72645E-05 |
| Train | 53.91218681 | 0.000807987 |
| Train | 64.47805665 | 0.020227732 |
| Train | 41.25313267 | 1.66698E-05 |
| Train | 58.44772173 | 0.003238529 |
| Train | 76.03457 | 0.416634071 |
| Train | 42.07753083 | 2.14641E-05 |
| Train | 58.43176949 | 0.003222778 |
| Train | 74.27765763 | 0.294144089 |
| Train | 75.98532695 | 0.412968764 |
| Train | 85.05500083 | 0.919041562 |
| Train | 45.25655745 | 5.68921E-05 |
| Train | 81.59243421 | 0.796999146 |
| Train | 53.02372938 | 0.000615419 |
| Train | 53.25988947 | 0.000661608 |
| Train | 79.57263547 | 0.678807546 |
| Train | 59.86736853 | 0.00499617 |
| Train | 52.96681382 | 0.000604778 |
| Train | 45.33327792 | 5.82463E-05 |
| Train | 64.6425915 | 0.021252205 |
| Train | 61.26902188 | 0.007658313 |
| Train | 87.01167994 | 0.95388418 |
| Train | 55.67935784 | 0.001388314 |
| Train | 52.5744987 | 0.000536267 |
| Train | 52.33910078 | 0.000498941 |
| Train | 49.67464386 | 0.000220466 |
| Train | 44.65153004 | 4.7259E-05 |
| Train | 59.0041672 | 0.00383874 |
| Train | 40.12322135 | 1.17886E-05 |
| Train | 63.44703876 | 0.014826317 |
| Train | 57.06329273 | 0.00212065 |
| Train | 41.28843047 | 1.68512E-05 |
| Train | 42.13634953 | 2.18548E-05 |
| Train | 66.04331446 | 0.032286126 |
| Train | 44.37062137 | 4.33588E-05 |
| Train | 41.66596211 | 1.89193E-05 |
| Train | 69.7768535 | 0.094879949 |
| Train | 50.60131943 | 0.000292898 |
| Train | 50.50944294 | 0.000284764 |
| Train | 52.46049428 | 0.000517854 |
| Train | 44.69285039 | 4.78615E-05 |
| Train | 51.59174832 | 0.000396796 |
| Train | 54.50995804 | 0.000970374 |
| Train | 48.24897696 | 0.000142403 |
| Train | 54.95422194 | 0.001111836 |
| Train | 47.34870224 | 0.000108054 |
| Train | 66.75423854 | 0.039837141 |
| Train | 69.79176678 | 0.095273304 |
| Train | 49.20235771 | 0.000190748 |
| Train | 65.32182744 | 0.026045148 |
| Train | 50.00274584 | 0.000243795 |
| Train | 47.94900104 | 0.00012989 |
| Train | 55.41960605 | 0.001282161 |
| Train | 41.78931457 | 1.96486E-05 |
| Train | 70.05837406 | 0.10255693 |
| Train | 67.01403433 | 0.042998481 |
| Train | 57.32529699 | 0.002297647 |
| Train | 44.22640408 | 4.14832E-05 |
| Train | 58.01572934 | 0.002837877 |
| Train | 62.39512429 | 0.010782707 |
| Train | 89.08627441 | 0.975048046 |
| Train | 62.952962 | 0.012768582 |
| Train | 39.35801669 | 9.32306E-06 |
| Train | 44.43578923 | 4.42339E-05 |
| Train | 57.23537939 | 0.002235301 |
| Train | 54.7162324 | 0.001033669 |
| Train | 68.09484414 | 0.058899195 |
| Train | 48.7919833 | 0.000168198 |
| Train | 68.06981136 | 0.05847514 |
| Train | 49.73329759 | 0.000224466 |
| Train | 67.09864225 | 0.04407881 |
| Train | 48.61678893 | 0.000159402 |
| Train | 68.81215603 | 0.072341316 |
| Train | 79.08824207 | 0.645602311 |
| Train | 68.7384246 | 0.070838684 |
| Train | 55.07443015 | 0.001153535 |
| Train | 40.24955249 | 1.22542E-05 |
| Train | 68.50491532 | 0.066268125 |
| Train | 72.75010905 | 0.206894888 |
| Train | 63.76483307 | 0.016319081 |
| Train | 83.87531591 | 0.887719947 |
| Train | 47.99416633 | 0.000131701 |
| Train | 57.02045471 | 0.002093034 |
| Train | 70.28820553 | 0.10922744 |
| Train | 59.74346158 | 0.004810799 |
| Train | 40.42952361 | 1.29494E-05 |
| Train | 72.28014171 | 0.184243983 |
| Train | 47.74497826 | 0.000122014 |
| Train | 77.54509663 | 0.531602362 |
| Train | 58.28967074 | 0.003085792 |
| Train | 59.59724833 | 0.004600843 |
| Train | 54.27013837 | 0.000901638 |
| Train | 48.30798885 | 0.000145003 |
| Train | 78.16996941 | 0.578882441 |
| Train | 66.68991504 | 0.039089528 |
| Train | 50.02326448 | 0.000245334 |
| Train | 59.6915868 | 0.004735239 |
| Train | 39.8934655 | 1.09866E-05 |
| Train | 68.76810929 | 0.071440139 |
| Train | 72.60165193 | 0.199524732 |
| Train | 48.18413159 | 0.0001396 |
| Train | 48.98002958 | 0.000178179 |
| Train | 70.27563525 | 0.108852993 |
| Train | 52.43463014 | 0.000513765 |
| Train | 59.20979428 | 0.004087556 |
| Train | 72.59877894 | 0.19938407 |
| Train | 57.28281142 | 0.002267976 |
| Train | 53.43646178 | 0.000698392 |
| Train | 71.73813471 | 0.160561783 |
| Train | 67.98725277 | 0.057096861 |
| Train | 53.37790255 | 0.000685971 |
| Train | 47.36635625 | 0.000108641 |
| Train | 71.70870045 | 0.159348984 |
| Train | 53.06315663 | 0.0006229 |
| Train | 70.68701714 | 0.121706745 |
| Train | 51.14245 | 0.000345746 |
| Train | 62.12732743 | 0.0099411 |
| Train | 79.4170021 | 0.668315064 |
| Train | 66.39541112 | 0.03583515 |
| Train | 56.79913046 | 0.001955969 |
| Train | 68.80809853 | 0.072257842 |
| Train | 88.89567088 | 0.973585931 |
| Train | 51.13422379 | 0.000344875 |
| Train | 62.26490272 | 0.010365 |
| Train | 46.32117008 | 7.8853E-05 |
| Train | 53.18461507 | 0.000646521 |
| Train | 44.43012834 | 4.41572E-05 |
| Train | 38.34528746 | 6.83429E-06 |
| Train | 40.52533759 | 1.33355E-05 |
| Train | 55.23929388 | 0.001213277 |
| Train | 55.18422623 | 0.001192986 |
| Train | 64.80071244 | 0.022284497 |
| Train | 49.87693706 | 0.000234572 |
| Train | 58.00511483 | 0.002828681 |
| Train | 51.76852815 | 0.00041889 |
| Train | 70.46002641 | 0.114460243 |
| Train | 74.20133847 | 0.289308783 |
| Train | 68.84347101 | 0.072988355 |
| Train | 59.38640055 | 0.004314037 |
| Train | 54.03517349 | 0.000839013 |
| Train | 58.81460819 | 0.003622756 |
| Train | 62.25580369 | 0.010336421 |
| Train | 54.90942946 | 0.001096686 |
| Train | 77.55197253 | 0.532127275 |
| Train | 53.28157952 | 0.00066602 |
| Train | 53.95010471 | 0.000817428 |
| Train | 55.74301997 | 0.001415643 |
| Train | 89.9297082 | 0.980624179 |
| Train | 56.44977821 | 0.001757619 |
| Train | 59.93263872 | 0.005096655 |
| Train | 46.59598358 | 8.57852E-05 |
| Train | 46.421152 | 8.13077E-05 |
| Train | 65.82555483 | 0.03026379 |
| Train | 61.99909023 | 0.009561437 |
| Train | 48.73798945 | 0.000165436 |
| Train | 68.16990546 | 0.060188002 |
| Train | 63.89513981 | 0.016973044 |
| Train | 54.423257 | 0.00094494 |
| Train | 60.73528456 | 0.006509644 |
| Train | 48.36861918 | 0.000147723 |
| Train | 71.00336782 | 0.13246231 |
| Train | 72.94613578 | 0.216931996 |
| Train | 59.19592429 | 0.004070279 |
| Train | 48.19379984 | 0.000140014 |
| Train | 44.67441488 | 4.75918E-05 |
| Train | 82.26756047 | 0.828447147 |
| Train | 61.17268663 | 0.007437052 |
| Train | 50.88999242 | 0.000319998 |
| Train | 56.74017977 | 0.001920997 |
| Train | 55.28285488 | 0.001229572 |
| Train | 51.55940077 | 0.000392882 |
| Train | 70.7446311 | 0.12360787 |
| Train | 52.66559068 | 0.000551449 |
| Train | 57.62323145 | 0.002516889 |
| Train | 48.4252674 | 0.000150311 |
| Train | 60.82410298 | 0.006688169 |
| Train | 44.54786437 | 4.57804E-05 |
| Train | 45.72404494 | 6.56605E-05 |
| Train | 61.65372095 | 0.008608899 |
| Train | 65.57884521 | 0.028120776 |
| Train | 43.28610693 | 3.10926E-05 |
| Train | 60.56168202 | 0.006174262 |
| Train | 54.20915256 | 0.000884948 |
| Train | 56.97472988 | 0.002063952 |
| Train | 64.05213864 | 0.017795254 |
| Train | 63.29816797 | 0.014174097 |
| Train | 56.25417524 | 0.001655467 |
| Train | 50.94306285 | 0.000325247 |
| Train | 60.18152768 | 0.005498632 |
| Train | 69.78322748 | 0.095047833 |
| Train | 57.74599026 | 0.002613185 |
| Train | 56.62293755 | 0.001853288 |
| Train | 46.58209724 | 8.54207E-05 |
| Train | 71.89556195 | 0.167175201 |
| Train | 49.3613828 | 0.000200278 |
| Train | 72.65992042 | 0.202393729 |
| Train | 68.9303192 | 0.074810868 |
| Train | 58.6517638 | 0.003446908 |
| Train | 43.41222439 | 3.23185E-05 |
| Train | 40.48275567 | 1.31625E-05 |
| Train | 59.61367059 | 0.004623962 |
| Train | 51.44494797 | 0.000379338 |
| Train | 39.49531167 | 9.72393E-06 |
| Train | 68.7282496 | 0.070633575 |
| Train | 72.07943296 | 0.17517305 |
| Train | 49.98503525 | 0.000242475 |
| Train | 41.79498466 | 1.96828E-05 |
| Train | 58.91631245 | 0.003737088 |
| Train | 69.20068564 | 0.080755139 |
| Train | 49.74087162 | 0.000224988 |
| Train | 71.34377407 | 0.144924149 |
| Train | 61.13287568 | 0.00734748 |
| Train | 65.80265713 | 0.030058417 |
| Train | 41.5237887 | 1.81123E-05 |
| Train | 46.04073866 | 7.23562E-05 |
| Train | 52.17120738 | 0.000473916 |
| Train | 62.45763065 | 0.010989074 |
| Train | 45.71845334 | 6.5548E-05 |
| Train | 45.58713608 | 6.29612E-05 |
| Train | 53.10412851 | 0.00063077 |
| Train | 49.49405073 | 0.000208592 |
| Train | 67.59626065 | 0.050974646 |
| Train | 48.5920561 | 0.000158197 |
| Train | 82.91613397 | 0.854897224 |
| Train | 55.38838032 | 0.001269958 |
| Train | 64.59402996 | 0.020944667 |
| Train | 67.46559239 | 0.049070814 |
| Train | 43.08058262 | 2.91936E-05 |
| Train | 60.23868152 | 0.005595303 |
| Train | 54.21113196 | 0.000885485 |
| Train | 65.76025629 | 0.029681644 |
| Train | 60.12883201 | 0.005410971 |
| Train | 39.73927367 | 1.04793E-05 |
| Train | 49.29976158 | 0.00019653 |
| Train | 61.27129675 | 0.007663616 |
| Train | 49.09693075 | 0.000184681 |
| Train | 55.65012085 | 0.00137594 |
| Train | 56.31501139 | 0.001686586 |
| Train | 67.46889187 | 0.049118045 |
| Train | 63.5896323 | 0.015478709 |
| Train | 46.46474489 | 8.24017E-05 |
| Train | 52.17878454 | 0.000475018 |
| Train | 40.6684114 | 1.39336E-05 |
| Train | 50.81211051 | 0.000312449 |
| Train | 74.61984637 | 0.316389691 |
| Train | 48.084686 | 0.000135407 |
| Train | 60.60425178 | 0.006254877 |
| Train | 80.04773 | 0.709710692 |
| Train | 53.37113204 | 0.00068455 |
| Train | 83.72623574 | 0.883082119 |
| Train | 60.09618288 | 0.005357361 |
| Train | 58.38401228 | 0.003176076 |
| Train | 42.74034493 | 2.63014E-05 |
| Train | 45.06716356 | 5.36824E-05 |
| Train | 39.97792225 | 1.12749E-05 |
| Train | 54.40380276 | 0.000939325 |
| Train | 66.41084267 | 0.035998996 |
| Train | 60.60743806 | 0.006260955 |
| Train | 83.18294661 | 0.864754484 |
| Train | 88.05892759 | 0.966121622 |
| Train | 49.6111222 | 0.000216214 |
| Train | 52.01853814 | 0.000452251 |
| Train | 85.35171985 | 0.925558291 |
| Train | 58.74285586 | 0.003544198 |
| Train | 57.72437796 | 0.002595969 |
| Train | 65.91262016 | 0.031057214 |
| Train | 44.62221049 | 4.6836E-05 |
| Train | 51.54031658 | 0.00039059 |
| Train | 79.59425643 | 0.680251296 |
| Train | 45.88541034 | 6.89909E-05 |
| Train | 92.26532121 | 0.990437991 |
| Train | 53.58090647 | 0.000729997 |
| Train | 64.36547186 | 0.019554748 |
| Train | 50.74246099 | 0.000305849 |
| Train | 49.90428757 | 0.000236547 |
| Train | 46.82104367 | 9.19139E-05 |
| Train | 50.85151048 | 0.000316246 |
| Train | 90.86644787 | 0.985391026 |
| Train | 50.45187882 | 0.000279783 |
| Train | 58.13842167 | 0.002946358 |
| Train | 68.41676558 | 0.064615095 |
| Train | 78.5022648 | 0.603502792 |
| Train | 63.2313687 | 0.013890712 |
| Train | 67.15964467 | 0.044873763 |
| Train | 53.04297679 | 0.00061906 |
| Train | 46.81001338 | 9.16035E-05 |
| Train | 52.59150866 | 0.00053907 |
| Train | 53.99449506 | 0.000828621 |
| Train | 41.98590572 | 2.08695E-05 |
| Train | 54.55207119 | 0.000982974 |
| Train | 51.78836034 | 0.000421444 |
| Train | 41.95585584 | 2.06781E-05 |
| Train | 62.73954907 | 0.011969433 |
| Train | 69.2655178 | 0.082243255 |
| Train | 47.12937031 | 0.000101027 |
| Train | 54.95955735 | 0.001113655 |
| Train | 59.91237216 | 0.005065242 |
| Train | 51.31124939 | 0.000364106 |
| Train | 63.81436509 | 0.016564695 |
| Train | 45.96762327 | 7.07521E-05 |
| Train | 56.54969998 | 0.001812206 |
| Train | 66.60970686 | 0.038176105 |
| Train | 45.94354033 | 7.02316E-05 |
| Train | 43.28475675 | 3.10797E-05 |
| Train | 75.86042136 | 0.403715655 |
| Train | 59.93164352 | 0.00509511 |
| Train | 55.49891682 | 0.001313683 |
| Train | 52.58195826 | 0.000537494 |
| Train | 59.8549045 | 0.004977206 |
| Train | 47.22174278 | 0.000103929 |
| Train | 46.22148899 | 7.64794E-05 |
| Train | 44.62924671 | 4.69372E-05 |
| Train | 51.79289606 | 0.000422031 |
| Train | 53.81125676 | 0.000783382 |
| Train | 58.1962541 | 0.002998915 |
| Train | 108.6838312 | 0.999937161 |
| Train | 51.23531112 | 0.000355728 |
| Train | 42.97581165 | 2.82706E-05 |
| Train | 49.67659059 | 0.000220598 |
| Train | 47.13513701 | 0.000101206 |
| Train | 53.93716902 | 0.000814195 |
| Train | 71.77702573 | 0.162175603 |
| Train | 50.11408269 | 0.00025226 |
| Train | 50.94062664 | 0.000325004 |
| Train | 47.84646128 | 0.00012587 |
| Train | 58.43538637 | 0.003226343 |
| Train | 55.85102882 | 0.001463244 |
| Train | 46.218512 | 7.64096E-05 |
| Train | 84.37229932 | 0.902035937 |
| Train | 52.62124737 | 0.000544005 |
| Train | 43.58822336 | 3.41105E-05 |
| Train | 73.79369224 | 0.264298911 |
| Train | 56.66937987 | 0.001879819 |
| Train | 46.4764721 | 8.26986E-05 |
| Train | 56.74676363 | 0.001924871 |
| Train | 62.92863139 | 0.012674877 |
| Train | 48.89974248 | 0.000173847 |
| Train | 43.57793323 | 3.40031E-05 |
| Train | 46.56162092 | 8.48861E-05 |
| Train | 56.96160069 | 0.002055677 |
| Train | 70.89549817 | 0.128707179 |
| Train | 67.60440235 | 0.051095537 |
| Train | 51.43183362 | 0.000377816 |
| Train | 41.34397024 | 1.71406E-05 |
| Train | 52.96093507 | 0.00060369 |
| Train | 49.81393326 | 0.000230084 |
| Train | 48.84308579 | 0.000170854 |
| Train | 49.77696537 | 0.000227491 |
| Train | 65.84144029 | 0.030407073 |
| Train | 57.18922614 | 0.002203958 |
| Train | 60.8752635 | 0.0067932 |
| Train | 43.48464152 | 3.30442E-05 |
| Train | 70.49259491 | 0.115476371 |
| Train | 45.55786416 | 6.23986E-05 |
| Train | 53.6732018 | 0.000750936 |
| Train | 91.26488507 | 0.987049405 |
| Train | 65.5709834 | 0.028054978 |
| Train | 77.81265657 | 0.551967099 |
| Train | 49.92773809 | 0.000238253 |
| Train | 48.90305103 | 0.000174024 |
| Train | 64.56822733 | 0.020783044 |
| Train | 51.89125364 | 0.000434947 |
| Train | 50.86481361 | 0.000317538 |
| Train | 55.10857272 | 0.001165662 |
| Train | 54.16970637 | 0.000874318 |
| Train | 58.96460456 | 0.003792629 |
| Train | 71.05474337 | 0.134283101 |
| Train | 44.45865554 | 4.45451E-05 |
| Train | 84.10271835 | 0.894484521 |
| Train | 44.12144816 | 4.01694E-05 |
| Train | 57.77793306 | 0.002638838 |
| Train | 61.39508574 | 0.007957747 |
| Train | 49.1313743 | 0.000186642 |
| Train | 69.33338302 | 0.083827708 |
| Train | 60.48127356 | 0.006024794 |
| Train | 61.76126755 | 0.008894963 |
| Train | 51.3994393 | 0.000374083 |
| Train | 42.05941811 | 2.13453E-05 |
| Train | 53.7441125 | 0.000767431 |
| Train | 56.51823752 | 0.001794837 |
| Train | 65.39768901 | 0.026641779 |
| Train | 49.76858325 | 0.000226908 |
| Train | 43.84854316 | 3.69449E-05 |
| Train | 58.77272686 | 0.003576694 |
| Train | 55.0798365 | 0.001155447 |
| Train | 45.43896584 | 6.01648E-05 |
| Train | 51.40536047 | 0.000374762 |
| Train | 55.47661876 | 0.001304743 |
| Train | 53.84291932 | 0.000791019 |
| Train | 63.70905492 | 0.016046772 |
| Train | 52.3244973 | 0.000496713 |
| Train | 48.74496637 | 0.00016579 |
| Train | 44.54268673 | 4.57078E-05 |
| Train | 43.43656456 | 3.25606E-05 |
| Train | 48.69013513 | 0.000163027 |
| Train | 52.11015987 | 0.000465131 |
| Train | 57.24103132 | 0.002239169 |
| Train | 52.70967693 | 0.00055895 |
| Train | 38.0700169 | 6.2811E-06 |
| Train | 50.72514867 | 0.00030423 |
| Train | 51.64766378 | 0.000403656 |
| Train | 70.06779994 | 0.10282326 |
| Train | 47.31755053 | 0.000107027 |
| Train | 98.56945115 | 0.998604954 |
| Train | 57.54269835 | 0.002455648 |
| Train | 75.84873574 | 0.402853422 |
| Train | 39.61692145 | 1.00934E-05 |
| Train | 55.71762564 | 0.001404677 |
| Train | 67.3542186 | 0.047501528 |
| Train | 50.55891067 | 0.000289115 |
| Train | 39.84372284 | 1.08203E-05 |
| Train | 57.40243877 | 0.002352515 |
| Train | 58.75595144 | 0.003558408 |
| Train | 41.16286023 | 1.62147E-05 |
| Train | 41.09417073 | 1.58767E-05 |
| Train | 76.04699045 | 0.417560115 |
| Train | 74.12410496 | 0.2844638 |
| Train | 43.33788984 | 3.15902E-05 |
| Train | 42.41715887 | 2.382E-05 |
| Train | 49.77262542 | 0.000227189 |
| Train | 62.82545895 | 0.012285012 |
| Train | 48.69175272 | 0.000163108 |
| Train | 67.06775456 | 0.043681453 |
| Train | 56.19200027 | 0.001624255 |
| Train | 76.7172008 | 0.468221348 |
| Train | 64.13921809 | 0.018268021 |
| Train | 58.71537101 | 0.003514558 |
| Train | 74.66140288 | 0.319152207 |
| Train | 60.72241997 | 0.006484182 |
| Train | 75.42507292 | 0.372034029 |
| Train | 78.58465283 | 0.609531803 |
| Train | 50.77637412 | 0.000309045 |
| Train | 71.6426088 | 0.156652951 |
| Train | 58.70782346 | 0.003506462 |
| Train | 46.42520534 | 8.14088E-05 |
| Train | 48.39749411 | 0.000149037 |
| Train | 64.91226028 | 0.023042058 |
| Train | 69.86931602 | 0.097342823 |
| Train | 52.32250139 | 0.000496409 |
| Train | 52.1650289 | 0.000473019 |
| Train | 58.11003083 | 0.002920893 |
| Train | 64.27946146 | 0.019055461 |
| Train | 53.24870565 | 0.000659344 |
| Train | 50.93776694 | 0.000324719 |
| Train | 58.90259436 | 0.003721459 |
| Train | 47.31373206 | 0.000106902 |
| Train | 49.79066148 | 0.000228449 |
| Train | 46.60428482 | 8.60038E-05 |
| Train | 86.27205002 | 0.942815547 |
| Train | 60.41935579 | 0.005912154 |
| Train | 51.14300064 | 0.000345804 |
| Train | 43.14079623 | 2.97376E-05 |
| Train | 87.74227449 | 0.962795619 |
| Train | 75.21762501 | 0.357297774 |
| Train | 68.96918709 | 0.075639973 |
| Train | 44.10529906 | 3.9971E-05 |
| Train | 48.88724459 | 0.000173182 |
| Train | 52.13037101 | 0.000468021 |
| Train | 52.17129644 | 0.000473929 |
| Train | 58.06694071 | 0.002882663 |
| Train | 55.83069075 | 0.00145416 |
| Train | 63.7565646 | 0.01627843 |
| Train | 55.44990528 | 0.001294113 |
| Train | 50.68074271 | 0.000300117 |
| Train | 44.06820621 | 3.9519E-05 |
| Train | 62.87160241 | 0.012457897 |
| Train | 56.13530235 | 0.001596305 |
| Train | 70.51686526 | 0.116238713 |
| Train | 51.27594022 | 0.000360186 |
| Train | 72.73313113 | 0.206041934 |
| Train | 44.89423042 | 5.091E-05 |
| Train | 52.06857983 | 0.000459241 |
| Train | 47.98562402 | 0.000131357 |
| Train | 77.80710897 | 0.551546358 |
| Train | 53.77766766 | 0.000775361 |
| Train | 94.40569517 | 0.995016708 |
| Train | 83.0232828 | 0.858925606 |
| Train | 42.79204528 | 2.67217E-05 |
| Train | 46.13302746 | 7.44329E-05 |
| Train | 65.31253756 | 0.025972977 |
| Train | 60.04990021 | 0.005282264 |
| Train | 51.61248886 | 0.000399327 |
| Train | 70.28603721 | 0.10916279 |
| Train | 61.68614408 | 0.008694169 |
| Train | 62.48183914 | 0.011070048 |
| Train | 53.3374996 | 0.000677531 |
| Train | 47.55401469 | 0.000115075 |
| Train | 46.67205537 | 8.78096E-05 |
| Train | 57.40767014 | 0.002356284 |
| Train | 60.06943497 | 0.005313832 |
| Train | 57.58288646 | 0.002486021 |
| Train | 66.98242942 | 0.042601453 |
| Train | 70.36076904 | 0.111411279 |
| Train | 45.44070088 | 6.01968E-05 |
| Train | 43.65563091 | 3.48229E-05 |
| Train | 78.98964008 | 0.638654468 |
| Train | 53.54115889 | 0.00072116 |
| Train | 60.09860471 | 0.005361319 |
| Train | 54.75968519 | 0.00104752 |
| Train | 54.86234534 | 0.001080983 |
| Train | 65.51510367 | 0.027591514 |
| Train | 50.37075126 | 0.000272911 |
| Train | 54.27146463 | 0.000902005 |
| Train | 59.70488463 | 0.004754497 |
| Train | 39.54721619 | 9.87994E-06 |
| Train | 51.19928115 | 0.000351821 |
| Train | 55.59513704 | 0.001352967 |
| Train | 62.4929848 | 0.011107525 |
| Train | 71.82765165 | 0.164296039 |
| Train | 62.3023455 | 0.010483435 |
| Train | 65.55182814 | 0.027895258 |
| Train | 52.63085552 | 0.00054561 |
| Train | 47.43709662 | 0.000111023 |
| Train | 67.35109189 | 0.047458168 |
| Train | 88.6956154 | 0.97196168 |
| Train | 51.31696378 | 0.000364744 |
| Train | 42.94801426 | 2.80307E-05 |
| Train | 62.40393938 | 0.010811577 |
| Train | 50.47330165 | 0.000281626 |
| Train | 52.3526055 | 0.00050101 |
| Train | 50.12526491 | 0.000253126 |
| Train | 75.58388267 | 0.383479905 |
| Train | 75.35163801 | 0.366788525 |
| Train | 44.31374279 | 4.26091E-05 |
| Train | 63.09830029 | 0.013342736 |
| Train | 82.25643997 | 0.827962008 |
| Train | 47.97436696 | 0.000130904 |
| Train | 82.66630237 | 0.845133492 |
| Train | 41.62719612 | 1.86958E-05 |
| Train | 77.02834646 | 0.492031456 |
| Train | 46.61164978 | 8.61982E-05 |
| Train | 49.9960095 | 0.000243292 |
| Train | 48.44418859 | 0.000151186 |
| Train | 61.4758358 | 0.008155621 |
| Train | 55.39197776 | 0.001271358 |
| Train | 47.77345095 | 0.000123084 |
| Train | 82.47722318 | 0.837392346 |
| Train | 78.86293475 | 0.629640807 |
| Train | 65.78248066 | 0.029878544 |
| Train | 65.39492122 | 0.026619763 |
| Train | 41.98910631 | 2.089E-05 |
| Train | 71.34560432 | 0.144993732 |
| Train | 50.98503288 | 0.000329458 |
| Train | 69.17449863 | 0.080161055 |
| Train | 76.84355975 | 0.477879615 |
| Train | 46.7084226 | 8.87942E-05 |
| Train | 76.57753653 | 0.457574436 |
| Train | 39.33329857 | 9.25266E-06 |
| Train | 65.06159074 | 0.024095673 |
| Train | 61.70117223 | 0.008733975 |
| Train | 62.2045792 | 0.010176969 |
| Train | 59.73289168 | 0.004795305 |
| Train | 83.61404088 | 0.879483057 |
| Train | 62.52096442 | 0.011202161 |
| Train | 54.96099732 | 0.001114146 |
| Train | 54.97366612 | 0.001118478 |
| Train | 70.56935203 | 0.117902293 |
| Train | 78.62924951 | 0.612781583 |
| Train | 48.40342465 | 0.000149308 |
| Train | 69.09636336 | 0.078412081 |
| Train | 58.10887753 | 0.002919863 |
| Train | 47.67148111 | 0.000119295 |
| Train | 61.23823525 | 0.007586902 |
| Train | 50.29443765 | 0.0002666 |
| Train | 45.72650051 | 6.57099E-05 |
| Train | 71.44917252 | 0.148975298 |
| Train | 78.9787026 | 0.637880047 |
| Train | 54.49600547 | 0.000966236 |
| Train | 41.43482698 | 1.76249E-05 |
| Train | 78.47500848 | 0.601501144 |
| Train | 60.09160861 | 0.005349892 |
| Train | 60.53191034 | 0.006118495 |
| Train | 62.15723696 | 0.010031771 |
| Train | 52.92363013 | 0.000596828 |
| Train | 61.7951223 | 0.008986955 |
| Train | 77.66993599 | 0.541121643 |
| Train | 76.15432319 | 0.425585491 |
| Train | 56.69023966 | 0.001891859 |
| Train | 54.6367772 | 0.001008814 |
| Train | 42.62622311 | 2.5397E-05 |
| Train | 52.10917906 | 0.000464991 |
| Train | 78.64422941 | 0.613871 |
| Train | 67.50407541 | 0.049624401 |
| Train | 51.39764878 | 0.000373877 |
| Train | 47.20700387 | 0.000103461 |
| Train | 82.97111994 | 0.856976268 |
| Train | 63.09205701 | 0.013317552 |
| Train | 58.4040262 | 0.003195565 |
| Train | 49.53454941 | 0.000211198 |
| Train | 64.77316619 | 0.022101206 |
| Train | 43.08867033 | 2.92661E-05 |
| Train | 65.16441278 | 0.024848318 |
| Train | 65.86496872 | 0.030620503 |
| Train | 100.9669926 | 0.9993307 |
| Train | 78.80057839 | 0.625171169 |
| Train | 75.3651774 | 0.367753364 |
| Train | 57.59220475 | 0.002493116 |
| Train | 71.97523428 | 0.17060428 |
| Train | 50.02828156 | 0.000245711 |
| Train | 59.8988006 | 0.005044312 |
| Train | 48.80442107 | 0.00016884 |
| Train | 69.00232989 | 0.076353573 |
| Train | 76.90793728 | 0.482807031 |
| Train | 64.73394837 | 0.021842781 |
| Train | 58.40884679 | 0.003200277 |
| Train | 58.0438413 | 0.002862374 |
| Train | 45.58920831 | 6.30012E-05 |
| Train | 41.64888546 | 1.88205E-05 |
| Train | 60.65431975 | 0.006351031 |
| Train | 50.82999953 | 0.000314167 |
| Train | 76.05540159 | 0.418187447 |
| Train | 53.32427496 | 0.000674791 |
| Train | 66.17360438 | 0.033557953 |
| Train | 63.99746488 | 0.017504583 |
| Train | 77.38752149 | 0.519554871 |
| Train | 62.97681629 | 0.012861119 |
| Train | 58.69987463 | 0.003497956 |
| Train | 51.86549304 | 0.000431527 |
| Train | 70.35526753 | 0.111244371 |
| Train | 53.88848435 | 0.00080214 |
| Train | 55.52208934 | 0.001323038 |
| Train | 46.96239776 | 9.5985E-05 |
| Train | 43.36202153 | 3.18248E-05 |
| Train | 63.68336065 | 0.015922853 |
| Train | 52.89578342 | 0.000591756 |
| Train | 46.5896748 | 8.56194E-05 |
| Train | 73.4742702 | 0.245697963 |
| Train | 80.96929065 | 0.76432941 |
| Train | 51.74691914 | 0.000416125 |
| Train | 53.06116946 | 0.000622521 |
| Train | 43.08025474 | 2.91907E-05 |
| Train | 45.23741939 | 5.65592E-05 |
| Train | 64.42726336 | 0.019921353 |
| Train | 55.07792831 | 0.001154772 |
| Train | 57.39958597 | 0.002350463 |
| Train | 60.73855032 | 0.006516124 |
| Train | 52.20285573 | 0.000478535 |
| Train | 57.53133353 | 0.002447126 |
| Train | 47.66603314 | 0.000119096 |
| Train | 58.171063 | 0.002975908 |
| Train | 44.14079715 | 4.04085E-05 |
| Train | 45.88695007 | 6.90235E-05 |
| Train | 57.88083394 | 0.002723199 |
| Train | 48.08327319 | 0.000135349 |
| Train | 49.31797424 | 0.00019763 |
| Train | 77.32304698 | 0.514618143 |
| Train | 53.05274397 | 0.000620916 |
| Train | 45.09864278 | 5.4203E-05 |
| Train | 53.59505972 | 0.00073317 |
| Train | 56.91464283 | 0.002026349 |
| Train | 59.02618755 | 0.003864647 |
| Train | 48.23602238 | 0.000141838 |
| Train | 51.49652684 | 0.000385383 |
| Train | 57.11442208 | 0.002154087 |
| Train | 56.90901154 | 0.002022859 |
| Train | 58.4509554 | 0.003241732 |
| Train | 53.54181482 | 0.000721305 |
| Train | 66.48825263 | 0.036831868 |
| Train | 68.88560337 | 0.07386732 |
| Train | 81.82999585 | 0.808530281 |
| Train | 73.86819058 | 0.268764644 |
| Train | 56.12114844 | 0.001589402 |
| Train | 56.38627805 | 0.001723785 |
| Train | 46.37566646 | 8.01816E-05 |
| Train | 66.48456645 | 0.036791793 |
| Train | 59.33246201 | 0.004243571 |
| Train | 51.90080268 | 0.000436222 |
| Train | 46.89739195 | 9.40909E-05 |
| Train | 50.98742411 | 0.0003297 |
| Train | 60.45355028 | 0.005974101 |
| Train | 57.92714189 | 0.002762036 |
| Train | 43.19282846 | 3.02159E-05 |
| Train | 46.94792789 | 9.55601E-05 |
| Train | 56.10922883 | 0.001583613 |
| Train | 63.06493329 | 0.013208706 |
| Train | 57.33368078 | 0.002303547 |
| Train | 45.62790023 | 6.37531E-05 |
| Train | 70.21502377 | 0.107063158 |
| Train | 47.8258607 | 0.000125077 |
| Train | 77.2237169 | 0.50700721 |
| Train | 66.97915721 | 0.042560563 |
| Train | 64.40572284 | 0.019792791 |
| Train | 76.50640968 | 0.452166172 |
| Train | 77.42441413 | 0.522378054 |
| Train | 54.69559599 | 0.001027156 |
| Train | 55.60643347 | 0.001357655 |
| Train | 68.07231765 | 0.058517451 |
| Train | 46.78884886 | 9.1011E-05 |
| Train | 50.76582132 | 0.000308047 |
| Train | 73.50953507 | 0.247707526 |
| Train | 57.24888456 | 0.002244556 |
| Train | 55.0241355 | 0.001135902 |
| Train | 69.98773995 | 0.100580549 |
| Train | 56.41775468 | 0.001740474 |
| Train | 52.1464113 | 0.000470328 |
| Train | 36.62764261 | 4.03603E-06 |
| Train | 52.56353808 | 0.000534469 |
| Train | 45.7733749 | 6.66612E-05 |
| Train | 57.37163516 | 0.002330451 |
| Train | 53.47811822 | 0.000707363 |
| Train | 50.43444622 | 0.000278292 |
| Train | 66.52775771 | 0.03726405 |
| Train | 53.00481953 | 0.000611863 |
| Train | 62.56263049 | 0.011344566 |
| Train | 51.52719091 | 0.000389022 |
| Train | 48.52861263 | 0.00015515 |
| Train | 71.41955907 | 0.1478277 |
| Train | 50.01658371 | 0.000244832 |
| Train | 61.08677264 | 0.007245088 |
| Train | 53.92982342 | 0.000812364 |
| Train | 43.23004535 | 3.05627E-05 |
| Train | 63.61182382 | 0.01558275 |
| Train | 55.32023111 | 0.001243728 |
| Train | 55.95051009 | 0.001508499 |
| Train | 77.62263189 | 0.537517568 |
| Train | 47.1380907 | 0.000101297 |
| Train | 57.32886049 | 0.002300153 |
| Train | 52.02215113 | 0.000452752 |
| Train | 45.86865212 | 6.86373E-05 |
| Train | 55.36477786 | 0.001260812 |
| Train | 56.32501035 | 0.001691756 |
| Train | 45.16867795 | 5.53796E-05 |
| Train | 42.43733668 | 2.39678E-05 |
| Train | 60.82986073 | 0.00669991 |
| Train | 42.82460551 | 2.69898E-05 |
| Train | 62.65722297 | 0.011674543 |
| Train | 54.08696315 | 0.000852432 |
| Train | 63.36985543 | 0.014484561 |
| Train | 68.06667832 | 0.058422246 |
| Train | 61.41267696 | 0.008000442 |
| Train | 47.16235304 | 0.000102054 |
| Train | 43.1984458 | 3.02679E-05 |
| Train | 56.07489331 | 0.001567053 |
| Train | 74.22152406 | 0.290583025 |
| Train | 51.17177123 | 0.000348867 |
| Train | 53.70466528 | 0.000758211 |
| Train | 56.61752281 | 0.001850219 |
| Train | 46.54304433 | 8.4404E-05 |
| Train | 72.03588729 | 0.173252133 |
| Train | 44.22358079 | 4.14473E-05 |
| Train | 79.11243328 | 0.647297683 |
| Train | 44.06835347 | 3.95208E-05 |
| Train | 46.86196026 | 9.30742E-05 |
| Train | 45.26308366 | 5.70061E-05 |
| Train | 44.75175603 | 4.87339E-05 |
| Train | 48.85648526 | 0.000171557 |
| Train | 43.05401183 | 2.89567E-05 |
| Train | 41.30198561 | 1.69214E-05 |
| Train | 49.90237149 | 0.000236408 |
| Train | 49.95789822 | 0.000240466 |
| Train | 57.80611608 | 0.002661681 |
| Train | 54.87604314 | 0.001085528 |
| Train | 58.35007511 | 0.003143299 |
| Train | 47.01243872 | 9.74691E-05 |
| Train | 44.95212482 | 5.18218E-05 |
| Train | 57.52603023 | 0.002443159 |
| Train | 57.04568392 | 0.002109254 |
| Train | 73.38031707 | 0.240397857 |
| Train | 41.88053755 | 2.0206E-05 |
| Train | 50.63041576 | 0.000295522 |
| Train | 58.07317049 | 0.00288816 |
| Train | 56.03279893 | 0.001546987 |
| Train | 71.65771379 | 0.157265808 |
| Train | 47.89536161 | 0.000127771 |
| Train | 53.82208708 | 0.000785986 |
| Train | 54.57949903 | 0.000991268 |
| Train | 45.46661979 | 6.06771E-05 |
| Train | 56.75547675 | 0.001930011 |
| Train | 64.73277312 | 0.021835088 |
| Train | 60.26065801 | 0.005632924 |
| Train | 52.35677588 | 0.000501651 |
| Train | 50.27742986 | 0.000265214 |
| Train | 59.39809745 | 0.00432947 |
| Train | 77.38098439 | 0.519054506 |
| Train | 50.4943521 | 0.00028345 |
| Train | 67.72756222 | 0.052957928 |
| Train | 51.91692848 | 0.000438384 |
| Train | 57.83387312 | 0.00268437 |
| Train | 67.52232955 | 0.049889041 |
| Train | 39.1946401 | 8.86751E-06 |
| Train | 55.1542524 | 0.001182085 |
| Train | 55.62229789 | 0.001364267 |
| Train | 37.08239641 | 4.63996E-06 |
| Train | 45.08460256 | 5.39702E-05 |
| Train | 55.84628673 | 0.001461121 |
| Train | 45.33291779 | 5.82399E-05 |
| Train | 71.35617696 | 0.145396057 |
| Train | 48.16323223 | 0.000138708 |
| Train | 65.87531961 | 0.030714844 |
| Train | 57.10771431 | 0.002149671 |
| Train | 50.59366157 | 0.000292211 |
| Train | 50.0751048 | 0.000249264 |
| Train | 44.76652478 | 4.8955E-05 |
| Train | 42.35752935 | 2.33884E-05 |
| Train | 49.45654861 | 0.000206207 |
| Train | 74.83894342 | 0.331096487 |
| Train | 71.44560954 | 0.1488369 |
| Train | 49.6918458 | 0.000221632 |
| Train | 61.18103368 | 0.007455971 |
| Train | 74.46676627 | 0.306325727 |
| Train | 41.87535988 | 2.01739E-05 |
| Train | 60.47283624 | 0.006009322 |
| Train | 61.31735562 | 0.007771774 |
| Train | 68.69706935 | 0.070008508 |
| Train | 49.83253734 | 0.0002314 |
| Train | 48.8115216 | 0.000169208 |
| Train | 46.49039107 | 8.30523E-05 |
| Train | 53.03190293 | 0.000616963 |
| Train | 77.35825728 | 0.517314573 |
| Train | 75.56230252 | 0.381916601 |
| Train | 55.01093501 | 0.001131319 |
| Train | 57.67626466 | 0.002558048 |
| Train | 55.40953307 | 0.001278211 |
| Train | 51.90561689 | 0.000436866 |
| Train | 52.37906443 | 0.00050509 |
| Train | 53.92663082 | 0.00081157 |
| Train | 54.4467384 | 0.000951762 |
| Train | 82.22395824 | 0.826538719 |
| Train | 67.88459624 | 0.055425576 |
| Train | 54.39929275 | 0.000938028 |
| Train | 71.32882019 | 0.144356833 |
| Train | 44.11504492 | 4.00906E-05 |
| Train | 40.07162547 | 1.16035E-05 |
| Train | 73.79042384 | 0.264104102 |
| Train | 51.78835246 | 0.000421443 |
| Train | 68.33030391 | 0.063031081 |
| Train | 77.13742738 | 0.500392799 |
| Train | 59.00725196 | 0.003842359 |
| Train | 43.88882669 | 3.7404E-05 |
| Train | 84.99994563 | 0.91777661 |
| Train | 60.43234228 | 0.005935604 |
| Train | 46.4656758 | 8.24253E-05 |
| Train | 49.87716019 | 0.000234588 |
| Train | 70.55459449 | 0.117432459 |
| Train | 52.1966124 | 0.000477621 |
| Train | 57.13865005 | 0.002170115 |
| Train | 34.19324781 | 1.91322E-06 |
| Train | 68.06597157 | 0.05841034 |
| Train | 75.08297591 | 0.347873294 |
| Train | 38.21968474 | 6.57608E-06 |
| Train | 55.41467938 | 0.001280227 |
| Train | 55.23831253 | 0.001212913 |
| Train | 53.25264826 | 0.000660142 |
| Train | 74.40304553 | 0.302189611 |
| Train | 74.45783991 | 0.305744412 |
| Train | 58.67031997 | 0.003466507 |
| Train | 60.32837136 | 0.005750424 |
| Train | 52.98116573 | 0.000607444 |
| Train | 53.81756892 | 0.000784899 |
| Train | 71.29953193 | 0.143251063 |
| Train | 47.41866726 | 0.000110397 |
| Train | 53.83250187 | 0.000788498 |
| Train | 46.34230525 | 7.93656E-05 |
| Train | 81.15113071 | 0.774224907 |
| Train | 69.8527424 | 0.096897166 |
| Train | 57.685755 | 0.002565483 |
| Train | 59.47777392 | 0.004436074 |
| Train | 73.40032236 | 0.24151987 |
| Train | 42.99096081 | 2.84023E-05 |
| Train | 62.61657918 | 0.011531614 |
| Train | 54.77809753 | 0.001053444 |
| Train | 73.5932128 | 0.252519868 |
| Train | 56.54626337 | 0.001810301 |
| Train | 44.88714859 | 5.07996E-05 |
| Train | 56.0910787 | 0.001574837 |
| Train | 82.45224843 | 0.836346843 |
| Train | 59.5231892 | 0.004498004 |
| Train | 68.00801733 | 0.057440588 |
| Train | 73.01972947 | 0.220789885 |
| Train | 48.78599991 | 0.000167889 |
| Train | 43.71289166 | 3.54397E-05 |
| Train | 61.82935798 | 0.009080936 |
| Train | 49.24249465 | 0.00019311 |
| Train | 49.25896288 | 0.000194087 |
| Train | 47.51896403 | 0.000113845 |
| Train | 77.9050866 | 0.558965382 |
| Train | 42.1624824 | 2.20306E-05 |
| Train | 59.53973372 | 0.004520777 |
| Train | 50.80000638 | 0.000311292 |
| Train | 67.99242068 | 0.057182212 |
| Train | 58.32418807 | 0.003118524 |
| Train | 57.15111397 | 0.002178408 |
| Train | 63.01365473 | 0.013005324 |
| Train | 49.64583185 | 0.000218527 |
| Train | 48.53931924 | 0.00015566 |
| Train | 58.16981275 | 0.002974769 |
| Train | 61.15595486 | 0.007399277 |
| Train | 59.04221915 | 0.003883618 |
| Train | 57.78820361 | 0.002647139 |
| Train | 43.78770895 | 3.62621E-05 |
| Train | 65.76920988 | 0.029760817 |
| Train | 44.32278916 | 4.27275E-05 |
| Train | 54.79153143 | 0.001057788 |
| Train | 65.21100858 | 0.025196875 |
| Train | 53.37704076 | 0.00068579 |
| Train | 77.42249437 | 0.522231208 |
| Train | 40.28181142 | 1.2376E-05 |
| Train | 78.89869317 | 0.632194113 |
| Train | 83.36957542 | 0.871308825 |
| Train | 61.04410483 | 0.007151587 |
| Train | 76.54928702 | 0.455424929 |
| Train | 67.61219396 | 0.051211487 |
| Train | 59.20156011 | 0.004077291 |
| Train | 67.29571732 | 0.046696446 |
| Train | 49.44619179 | 0.000205554 |
| Train | 43.97861901 | 3.84482E-05 |
| Train | 41.24713653 | 1.66392E-05 |
| Train | 60.53321437 | 0.006120929 |
| Train | 61.2845129 | 0.007694498 |
| Train | 47.03706141 | 9.82077E-05 |
| Train | 75.86766089 | 0.404250209 |
| Train | 74.54566083 | 0.311490263 |
| Train | 81.93944598 | 0.813672173 |
| Train | 66.36139349 | 0.035476489 |
| Train | 49.34207768 | 0.000199096 |
| Train | 60.17202489 | 0.005482718 |
| Train | 85.98874513 | 0.937947711 |
| Train | 61.3655436 | 0.00788655 |
| Train | 45.77322825 | 6.66582E-05 |
| Train | 55.61129184 | 0.001359677 |
| Train | 47.66937877 | 0.000119218 |
| Train | 51.86808355 | 0.000431869 |
| Train | 77.28024581 | 0.511339153 |
| Train | 47.02521632 | 9.78517E-05 |
| Train | 47.26688633 | 0.000105378 |
| Train | 55.64153246 | 0.001372326 |
| Train | 58.77505096 | 0.003579235 |
| Train | 48.39665329 | 0.000148998 |
| Train | 70.06216535 | 0.102663966 |
| Train | 58.29005398 | 0.003086154 |
| Train | 69.16341761 | 0.079910875 |
| Train | 61.53969997 | 0.008315566 |
| Train | 42.90233243 | 2.76408E-05 |
| Train | 68.7697527 | 0.071473564 |
| Train | 52.07752577 | 0.000460502 |
| Train | 45.93648803 | 7.00799E-05 |
| Train | 56.89473009 | 0.002014038 |
| Train | 48.44123128 | 0.000151049 |
| Train | 48.5825041 | 0.000157735 |
| Train | 69.87396095 | 0.097468072 |
| Train | 43.73043521 | 3.56308E-05 |
| Train | 53.39965746 | 0.00069056 |
| Train | 55.18644872 | 0.001193799 |
| Train | 71.51015146 | 0.151361516 |
| Train | 84.23253075 | 0.898182888 |
| Train | 57.38171789 | 0.00233765 |
| Train | 46.00042802 | 7.14674E-05 |
| Train | 58.35545907 | 0.003148477 |
| Train | 48.17562418 | 0.000139236 |
| Train | 53.96941206 | 0.000822278 |
| Train | 50.86496193 | 0.000317552 |
| Train | 34.20782276 | 1.92179E-06 |
| Train | 52.10653114 | 0.000464614 |
| Train | 50.90448094 | 0.000321423 |
| Train | 57.60337626 | 0.00250165 |
| Train | 60.98289916 | 0.007019551 |
| Train | 60.22443772 | 0.005571054 |
| Train | 57.74428309 | 0.002611821 |
| Train | 82.44254516 | 0.835939205 |
| Train | 65.044986 | 0.023976227 |
| Train | 44.25835297 | 4.18916E-05 |
| Train | 49.58510286 | 0.000214496 |
| Train | 78.97655035 | 0.637727646 |
| Train | 52.89657326 | 0.000591899 |
| Train | 83.40312298 | 0.872457917 |
| Train | 70.99808544 | 0.132276238 |
| Train | 40.16169411 | 1.19284E-05 |
| Train | 59.89367641 | 0.005036432 |
| Train | 45.22185904 | 5.629E-05 |
| Train | 54.28206979 | 0.00090494 |
| Train | 59.7695123 | 0.004849196 |
| Train | 67.03714195 | 0.043291006 |
| Train | 51.03121961 | 0.000334156 |
| Train | 50.28807755 | 0.000266081 |
| Train | 61.85561756 | 0.00915368 |
| Train | 57.27769099 | 0.002264426 |
| Train | 71.0199468 | 0.13304758 |
| Train | 61.11920389 | 0.007316967 |
| Train | 75.61835308 | 0.385981949 |
| Train | 60.57356994 | 0.00619667 |
| Train | 73.30442083 | 0.236173849 |
| Train | 53.33094469 | 0.000676172 |
| Train | 77.75331545 | 0.547463038 |
| Train | 62.42024252 | 0.010865172 |
| Train | 89.8053666 | 0.979886335 |
| Train | 53.41224694 | 0.000693229 |
| Train | 46.54404272 | 8.44298E-05 |
| Train | 55.30302339 | 0.00123719 |
| Train | 46.78969647 | 9.10347E-05 |
| Train | 67.05824376 | 0.043559789 |
| Train | 55.0000073 | 0.001127538 |
| Train | 49.86655189 | 0.000233826 |
| Train | 43.74428097 | 3.57824E-05 |
| Train | 59.84686084 | 0.004965006 |
| Train | 72.89028858 | 0.214037068 |
| Train | 67.2399071 | 0.045940491 |
| Train | 74.10702877 | 0.283399354 |
| Train | 52.01576394 | 0.000451867 |
| Train | 62.36751528 | 0.010692777 |
| Train | 54.40408006 | 0.000939405 |
| Train | 57.12699534 | 0.002162391 |
| Train | 73.47110985 | 0.245518379 |
| Train | 53.95174453 | 0.000817839 |
| Train | 64.28609416 | 0.019093518 |
| Train | 45.68027669 | 6.47852E-05 |
| Train | 56.20291685 | 0.001629692 |
| Train | 64.33117283 | 0.019354124 |
| Train | 63.14501413 | 0.01353263 |
| Train | 79.25556743 | 0.657252065 |
| Train | 53.27138766 | 0.000663943 |
| Train | 60.10702259 | 0.0053751 |
| Train | 45.6674465 | 6.45308E-05 |
| Train | 76.12545403 | 0.423422891 |
| Train | 82.55861249 | 0.840762111 |
| Train | 33.84756659 | 1.7208E-06 |
| Train | 48.30400491 | 0.000144826 |
| Train | 52.94943106 | 0.000601565 |
| Train | 57.27313501 | 0.002261272 |
| Train | 75.74461618 | 0.395197355 |
| Train | 48.93328716 | 0.000175644 |
| Train | 52.04439962 | 0.00045585 |
| Train | 61.16919659 | 0.007429159 |
| Train | 62.64543692 | 0.011632918 |
| Train | 67.82080957 | 0.05441043 |
| Train | 76.6148862 | 0.460418121 |
| Train | 49.92537538 | 0.000238081 |
| Train | 59.38947125 | 0.004318083 |
| Train | 41.84516015 | 1.9988E-05 |
| Train | 50.54880503 | 0.000288221 |
| Train | 55.86915041 | 0.001471385 |
| Train | 52.89388283 | 0.000591411 |
| Train | 44.37921314 | 4.34732E-05 |
| Train | 50.75838607 | 0.000307346 |
| Train | 51.06228661 | 0.000337353 |
| Train | 41.55580205 | 1.82909E-05 |
| Train | 60.05094243 | 0.005283944 |
| Train | 64.6097606 | 0.021043807 |
| Train | 70.36379677 | 0.111503229 |
| Train | 90.97551725 | 0.985864744 |
| Train | 53.16853456 | 0.000643343 |
| Train | 81.7168672 | 0.803102496 |
| Train | 48.95234604 | 0.000176674 |
| Train | 56.70469597 | 0.001900247 |
| Train | 68.84924918 | 0.073108323 |
| Train | 42.93540076 | 2.79225E-05 |
| Train | 57.99519959 | 0.002820118 |
| Train | 56.1472717 | 0.001602164 |
| Train | 66.50115764 | 0.036972523 |
| Train | 54.12825894 | 0.000863286 |
| Train | 79.99722565 | 0.706509783 |
| Train | 74.30742916 | 0.29604314 |
| Train | 58.46005372 | 0.003250759 |
| Train | 66.25542256 | 0.034381212 |
| Train | 39.18570021 | 8.84323E-06 |
| Train | 48.39249336 | 0.000148808 |
| Train | 54.23673782 | 0.000892459 |
| Train | 78.13298866 | 0.576115573 |
| Train | 71.85648691 | 0.165513612 |
| Train | 39.88891273 | 1.09713E-05 |
| Train | 55.2371877 | 0.001212495 |
| Train | 68.28597408 | 0.062233025 |
| Train | 54.79979302 | 0.001060469 |
| Train | 54.83000658 | 0.001070328 |
| Train | 61.82687986 | 0.009074098 |
| Train | 50.02645322 | 0.000245574 |
| Train | 41.28082511 | 1.68119E-05 |
| Train | 52.05573533 | 0.000457437 |
| Train | 51.61708247 | 0.00039989 |
| Train | 79.18678477 | 0.652485195 |
| Train | 72.45002014 | 0.192202408 |
| Train | 74.15878716 | 0.286633534 |
| Train | 57.45828347 | 0.00239305 |
| Train | 43.9176219 | 3.77358E-05 |
| Train | 62.34599888 | 0.010623209 |
| Train | 42.09547242 | 2.15825E-05 |
| Train | 56.69087262 | 0.001892225 |
| Train | 55.98664806 | 0.001525282 |
| Train | 46.72212604 | 8.9168E-05 |
| Train | 62.31362983 | 0.010519393 |
| Train | 60.81485108 | 0.006669347 |
| Train | 56.38226945 | 0.001721671 |
| Train | 71.49673781 | 0.150833914 |
| Train | 51.51430152 | 0.000387488 |
| Train | 51.95020017 | 0.000442877 |
| Train | 48.04206835 | 0.00013365 |
| Train | 58.81148513 | 0.003619301 |
| Train | 51.24673984 | 0.000356977 |
| Train | 57.77202022 | 0.002634071 |
| Train | 73.77978539 | 0.263470557 |
| Train | 78.73843701 | 0.620695373 |
| Train | 45.95350179 | 7.04464E-05 |
| Train | 68.55991708 | 0.0673194 |
| Train | 56.65319652 | 0.001870531 |
| Train | 55.3785047 | 0.001266123 |
| Train | 51.60753502 | 0.000398721 |
| Train | 45.62148459 | 6.36278E-05 |
| Train | 76.07479588 | 0.419635407 |
| Train | 67.43293731 | 0.048605668 |
| Train | 55.58530551 | 0.0013489 |
| Train | 45.01980427 | 5.29085E-05 |
| Train | 58.15128045 | 0.002957963 |
| Train | 81.16532707 | 0.774984956 |
| Train | 51.98770877 | 0.000447998 |
| Train | 53.54415172 | 0.000721822 |
| Train | 49.73715435 | 0.000224732 |
| Train | 40.31486158 | 1.2502E-05 |
| Train | 49.67194848 | 0.000220284 |
| Train | 57.93503054 | 0.002768707 |
| Train | 63.06068089 | 0.013191723 |
| Train | 42.80408929 | 2.68205E-05 |
| Train | 53.58169454 | 0.000730173 |
| Train | 57.49957814 | 0.00242347 |
| Train | 53.55478562 | 0.000724178 |
| Train | 52.30385316 | 0.00049358 |
| Train | 56.26411323 | 0.001660511 |
| Train | 54.22684915 | 0.000889759 |
| Train | 50.38721875 | 0.000274292 |
| Train | 51.55831821 | 0.000392751 |
| Train | 52.09384011 | 0.00046281 |
| Train | 68.57147064 | 0.067542171 |
| Train | 73.47686488 | 0.24584543 |
| Train | 43.64909403 | 3.47532E-05 |
| Train | 72.90047464 | 0.214563019 |
| Train | 66.2387442 | 0.034211829 |
| Train | 65.03506487 | 0.023905151 |
| Train | 50.01593267 | 0.000244783 |
| Train | 50.95670715 | 0.00032661 |
| Train | 70.34838168 | 0.111035789 |
| Train | 44.5991314 | 4.65057E-05 |
| Train | 43.51052415 | 3.33075E-05 |
| Train | 69.11676437 | 0.078865336 |
| Train | 51.4898775 | 0.000384598 |
| Train | 69.82260654 | 0.096091533 |
| Train | 56.903396 | 0.002019387 |
| Train | 67.49859761 | 0.049545209 |
| Train | 68.55879374 | 0.067297779 |
| Train | 54.62433078 | 0.001004975 |
| Train | 48.23799784 | 0.000141924 |
| Train | 46.2045813 | 7.60839E-05 |
| Train | 46.40821797 | 8.09859E-05 |
| Train | 63.7871972 | 0.016429526 |
| Train | 54.94678755 | 0.001109307 |
| Train | 54.29843397 | 0.000909488 |
| Train | 79.05862626 | 0.643521799 |
| Train | 89.14525886 | 0.975484385 |
| Train | 54.10745689 | 0.000857801 |
| Train | 48.1945775 | 0.000140047 |
| Train | 54.98791459 | 0.00112337 |
| Train | 61.80203207 | 0.009005842 |
| Train | 52.9868093 | 0.000608496 |
| Train | 75.072291 | 0.347130328 |
| Train | 51.80791953 | 0.000423978 |
| Train | 57.15839457 | 0.002183265 |
| Train | 56.9213996 | 0.002030543 |
| Train | 85.97519913 | 0.937705519 |
| Train | 47.75221489 | 0.000122285 |
| Train | 63.64884571 | 0.01575786 |
| Train | 58.25113434 | 0.003049653 |
| Train | 56.20929092 | 0.001632875 |
| Train | 52.69377555 | 0.000556233 |
| Train | 66.78375469 | 0.040184775 |
| Train | 70.7554366 | 0.123967289 |
| Train | 65.43182865 | 0.026914585 |
| Train | 42.32238891 | 2.31377E-05 |
| Train | 83.62483331 | 0.879833324 |
| Train | 56.62815825 | 0.001856251 |
| Train | 58.48151268 | 0.00327215 |
| Train | 56.36523085 | 0.001712714 |
| Train | 52.09759068 | 0.000463343 |
| Train | 64.03091149 | 0.017681844 |
| Train | 69.55871617 | 0.089289173 |
| Train | 43.15807747 | 2.98956E-05 |
| Train | 67.85809995 | 0.055001769 |
| Train | 60.23684434 | 0.005592169 |
| Train | 49.41150556 | 0.000203379 |
| Train | 55.62384883 | 0.001364916 |
| Train | 49.96705553 | 0.000241142 |
| Train | 74.92725359 | 0.337120964 |
| Train | 50.14211281 | 0.000254437 |
| Train | 59.43767102 | 0.004382096 |
| Train | 67.17911895 | 0.045130383 |
| Train | 47.19954709 | 0.000103224 |
| Train | 62.56995843 | 0.011369801 |
| Train | 50.03714013 | 0.000246379 |
| Train | 41.84376306 | 1.99794E-05 |
| Train | 56.09677802 | 0.001577588 |
| Train | 69.50982524 | 0.088077556 |
| Train | 52.29065532 | 0.000491587 |
| Train | 56.90287357 | 0.002019063 |
| Train | 44.05829003 | 3.9399E-05 |
| Train | 57.02875964 | 0.002098359 |
| Train | 43.74310561 | 3.57695E-05 |
| Train | 54.72844493 | 0.001037543 |
| Train | 88.64029538 | 0.971495676 |
| Train | 42.031715 | 2.11647E-05 |
| Train | 46.17138844 | 7.53135E-05 |
| Train | 71.4278709 | 0.148149074 |
| Train | 71.89064094 | 0.16696521 |
| Train | 44.37145374 | 4.33698E-05 |
| Train | 50.81660659 | 0.00031288 |
| Train | 54.57243235 | 0.000989124 |
| Train | 42.75927083 | 2.64545E-05 |
| Train | 46.41568276 | 8.11715E-05 |
| Train | 69.86243915 | 0.097157688 |
| Train | 55.77092776 | 0.001427792 |
| Train | 59.03658643 | 0.003876944 |
| Train | 56.04449568 | 0.001552537 |
| Train | 49.33611689 | 0.000198733 |
| Train | 60.78764337 | 0.006614303 |
| Train | 60.3217165 | 0.00573877 |
| Train | 45.70460182 | 6.52702E-05 |
| Train | 86.21757634 | 0.941908277 |
| Train | 48.56224987 | 0.000156758 |
| Train | 56.3577583 | 0.001708801 |
| Train | 59.34961968 | 0.004265862 |
| Train | 70.65962389 | 0.120811707 |
| Train | 86.17029895 | 0.941109927 |
| Train | 50.23278568 | 0.000261609 |
| Train | 49.39826242 | 0.000202555 |
| Train | 49.48947438 | 0.000208299 |
| Train | 65.71939911 | 0.029322937 |
| Train | 83.13088374 | 0.86287647 |
| Train | 55.34367478 | 0.001252689 |
| Train | 56.29794018 | 0.001677795 |
| Train | 52.0308063 | 0.000453955 |
| Train | 61.67291418 | 0.008659276 |
| Train | 67.55506861 | 0.050367041 |
| Train | 69.78304306 | 0.095042989 |
| Train | 55.42158846 | 0.001282939 |
| Train | 61.8604767 | 0.009167203 |
| Train | 80.97759403 | 0.764787745 |
| Train | 59.46940584 | 0.004424757 |
| Train | 70.35585946 | 0.111262322 |
| Train | 70.50672239 | 0.115919589 |
| Train | 57.57748404 | 0.002481916 |
| Train | 51.96821417 | 0.000445329 |
| Train | 57.99614319 | 0.002820932 |
| Train | 56.02749261 | 0.001544476 |
| Train | 48.2749575 | 0.000143542 |
| Train | 50.30328346 | 0.000267324 |
| Train | 52.27945372 | 0.000489903 |
| Train | 51.18914591 | 0.00035073 |
| Train | 44.86467286 | 5.04507E-05 |
| Train | 76.92104524 | 0.483810672 |
| Train | 62.92873625 | 0.012675283 |
| Train | 65.30315466 | 0.025900284 |
| Train | 53.31798674 | 0.000673492 |
| Train | 57.2396208 | 0.002238203 |
| Train | 44.25677926 | 4.18714E-05 |
| Train | 52.85795418 | 0.000584935 |
| Train | 62.44807257 | 0.01095727 |
| Train | 49.84149799 | 0.000232037 |
| Train | 46.37121629 | 8.00723E-05 |
| Train | 59.62447 | 0.00463923 |
| Train | 62.0229314 | 0.00963092 |
| Train | 65.1257342 | 0.024562539 |
| Train | 43.28225418 | 3.10559E-05 |
| Train | 70.28404947 | 0.109103523 |
| Train | 45.90679692 | 6.94448E-05 |
| Train | 47.11411276 | 0.000100555 |
| Train | 44.64433727 | 4.71548E-05 |
| Train | 49.77104176 | 0.000227079 |
| Train | 52.79992641 | 0.000574625 |
| Train | 55.80404991 | 0.001442346 |
| Train | 85.0732609 | 0.919457185 |
| Train | 61.84831922 | 0.009133404 |
| Train | 80.97382585 | 0.764579849 |
| Train | 70.14462354 | 0.105016859 |
| Train | 51.22879899 | 0.000355019 |
| Train | 72.93603653 | 0.216406369 |
| Train | 83.52394049 | 0.876523784 |
| Train | 60.25091932 | 0.005616222 |
| Train | 45.03046555 | 5.30817E-05 |
| Train | 67.55228907 | 0.050326274 |
| Train | 60.52934745 | 0.006113718 |
| Train | 41.9452341 | 2.06108E-05 |
| Train | 44.8437838 | 5.01286E-05 |
| Train | 41.02266772 | 1.55324E-05 |
| Train | 65.96821974 | 0.031574371 |
| Train | 40.77218908 | 1.43841E-05 |
| Train | 68.49567496 | 0.066093025 |
| Train | 50.15880152 | 0.000255742 |
| Train | 46.2840316 | 7.79601E-05 |
| Train | 46.72026996 | 8.91173E-05 |
| Train | 48.67301242 | 0.000162173 |
| Train | 71.88298098 | 0.166638793 |
| Train | 45.41617354 | 5.97458E-05 |
| Train | 58.50735895 | 0.003298101 |
| Train | 73.92361039 | 0.27211756 |
| Train | 46.84977923 | 9.27273E-05 |
| Train | 65.16935537 | 0.024885063 |
| Train | 50.37327697 | 0.000273122 |
| Train | 61.57475579 | 0.008404681 |
| Train | 63.07049144 | 0.013230944 |
| Train | 54.52490643 | 0.000974828 |
| Train | 52.01155554 | 0.000451284 |
| Train | 54.05701875 | 0.000844648 |
| Train | 48.16177636 | 0.000138646 |
| Train | 82.87268969 | 0.853236893 |
| Train | 63.20248489 | 0.013769909 |
| Train | 56.16428652 | 0.001610532 |
| Train | 58.50749631 | 0.003298239 |
| Train | 65.76700709 | 0.029741345 |
| Train | 85.63311021 | 0.931289335 |
| Train | 62.82523956 | 0.0122842 |
| Train | 49.53285102 | 0.000211088 |
| Train | 60.96235895 | 0.006975786 |
| Train | 51.409248 | 0.000375209 |
| Train | 51.48039647 | 0.000383482 |
| Train | 45.67096401 | 6.46005E-05 |
| Train | 79.06811336 | 0.644188874 |
| Train | 75.4814567 | 0.376082129 |
| Train | 80.1782157 | 0.717884208 |
| Train | 64.36611351 | 0.019558529 |
| Train | 57.76037193 | 0.002624704 |
| Train | 54.96258668 | 0.001114689 |
| Train | 70.67612205 | 0.12135009 |
| Train | 55.21228222 | 0.001203281 |
| Train | 47.83100841 | 0.000125275 |
| Train | 62.98983225 | 0.012911886 |
| Train | 54.70865578 | 0.001031273 |
| Train | 81.51935408 | 0.79334933 |
| Train | 71.50130245 | 0.151013297 |
| Train | 46.71986446 | 8.91062E-05 |
| Train | 50.52440401 | 0.000286073 |
| Train | 47.59267552 | 0.000116447 |
| Train | 41.28751028 | 1.68464E-05 |
| Train | 58.54070294 | 0.003331882 |
| Train | 48.93506047 | 0.00017574 |
| Train | 68.59751507 | 0.068046867 |
| Train | 50.56759791 | 0.000289886 |
| Train | 65.93451119 | 0.031259841 |
| Train | 74.60983386 | 0.315726076 |
| Train | 49.9456272 | 0.000239563 |
| Train | 46.14242681 | 7.46477E-05 |
| Train | 90.5199758 | 0.983780061 |
| Train | 77.31799708 | 0.51423134 |
| Train | 70.66306025 | 0.120923685 |
| Train | 73.56639853 | 0.250971066 |
| Train | 70.28584135 | 0.109156932 |
| Train | 84.24749158 | 0.898601627 |
| Train | 53.91081789 | 0.000807648 |
| Train | 55.68455441 | 0.001390525 |
| Train | 52.6383841 | 0.00054687 |
| Train | 56.30702068 | 0.001682466 |
| Train | 66.77450952 | 0.040075575 |
| Train | 58.31458233 | 0.00310938 |
| Train | 62.35304562 | 0.010645939 |
| Train | 50.6858149 | 0.000300584 |
| Train | 56.79584734 | 0.001954004 |
| Train | 55.47853462 | 0.001305509 |
| Train | 69.34818516 | 0.084176944 |
| Train | 79.50183149 | 0.674055607 |
| Train | 58.52641359 | 0.003317363 |
| Train | 41.57582208 | 1.84036E-05 |
| Train | 56.26339166 | 0.001660144 |
| Train | 73.88085521 | 0.269528576 |
| Train | 66.29543325 | 0.034790857 |
| Train | 82.12550275 | 0.822167429 |
| Train | 64.82121703 | 0.022421908 |
| Train | 61.10296953 | 0.007280899 |
| Train | 66.47883967 | 0.036729611 |
| Train | 55.74405348 | 0.001416091 |
| Train | 62.15091968 | 0.010012552 |
| Train | 71.28473994 | 0.142695321 |
| Train | 54.80126619 | 0.001060947 |
| Train | 55.24159607 | 0.001214133 |
| Train | 51.56185492 | 0.000393177 |
| Train | 63.54493371 | 0.015271226 |
| Train | 52.772149 | 0.000569754 |
| Train | 44.3942822 | 4.36745E-05 |
| Train | 42.93899284 | 2.79533E-05 |
| Train | 52.11856641 | 0.000466331 |
| Train | 45.32974046 | 5.81832E-05 |
| Train | 46.11875653 | 7.41079E-05 |
| Train | 52.70940569 | 0.000558903 |
| Train | 52.24389896 | 0.000484593 |
| Train | 53.49787471 | 0.000711658 |
| Train | 44.97741305 | 5.22252E-05 |
| Train | 53.65273456 | 0.000746242 |
| Train | 67.08945192 | 0.043960242 |
| Train | 46.49298504 | 8.31184E-05 |
| Train | 61.97472964 | 0.009490957 |
| Train | 56.84907387 | 0.001986094 |
| Train | 60.0888275 | 0.005345356 |
| Train | 62.24090491 | 0.010289793 |
| Train | 48.45975054 | 0.000151909 |
| Train | 59.08233996 | 0.003931503 |
| Train | 50.02534154 | 0.00024549 |
| Train | 63.52311531 | 0.015170938 |
| Train | 63.56693239 | 0.015373005 |
| Train | 49.94453273 | 0.000239483 |
| Train | 58.6049872 | 0.003397987 |
| Train | 61.83108396 | 0.009085698 |
| Train | 59.4347743 | 0.004378222 |
| Train | 39.63166482 | 1.01391E-05 |
| Train | 63.53300138 | 0.015216296 |
| Train | 75.36167384 | 0.367503623 |
| Train | 69.43227766 | 0.086186242 |
| Train | 70.49038346 | 0.115407127 |
| Train | 45.8582922 | 6.84196E-05 |
| Train | 57.40937669 | 0.002357514 |
| Train | 52.21755801 | 0.000480697 |
| Train | 53.09145765 | 0.000628326 |
| Train | 71.81523967 | 0.163774162 |
| Train | 58.12455133 | 0.002933889 |
| Train | 63.8184815 | 0.016585269 |
| Train | 51.83004979 | 0.000426864 |
| Train | 65.35743982 | 0.026323589 |
| Train | 62.55115163 | 0.011305158 |
| Train | 66.9058487 | 0.041653903 |
| Train | 55.69984908 | 0.001397052 |
| Train | 79.18951022 | 0.652674594 |
| Train | 49.60189662 | 0.000215604 |
| Train | 52.40938297 | 0.000509805 |
| Train | 67.61343984 | 0.051230086 |
| Train | 53.60753049 | 0.000735977 |
| Train | 70.63826123 | 0.120117654 |
| Train | 68.86484372 | 0.073433013 |
| Train | 56.21280496 | 0.001634633 |
| Train | 60.6804017 | 0.006401704 |
| Train | 38.62995399 | 7.45766E-06 |
| Train | 61.8736344 | 0.00920392 |
| Train | 48.71234078 | 0.00016414 |
| Train | 71.42025894 | 0.147854753 |
| Train | 43.19206964 | 3.02088E-05 |
| Train | 62.75676124 | 0.012032019 |
| Train | 61.46006141 | 0.008116586 |
| Train | 50.7221775 | 0.000303953 |
| Train | 69.8406831 | 0.096574112 |
| Train | 47.81128341 | 0.00012452 |
| Train | 68.84444619 | 0.073008582 |
| Train | 80.73154075 | 0.750945426 |
| Train | 50.37827044 | 0.00027354 |
| Train | 74.27595114 | 0.294035502 |
| Train | 55.40304659 | 0.001275675 |
| Train | 83.56385394 | 0.877842322 |
| Train | 39.49393668 | 9.71983E-06 |
| Train | 42.88925735 | 2.75302E-05 |
| Train | 63.19029082 | 0.013719225 |
| Train | 64.82789989 | 0.022466866 |
| Train | 39.93974672 | 1.11436E-05 |
| Train | 49.51948578 | 0.000210225 |
| Train | 62.43014323 | 0.010897847 |
| Train | 85.86013448 | 0.935612382 |
| Train | 61.87058317 | 0.009195395 |
| Train | 69.7750874 | 0.094833406 |
| Train | 66.66451936 | 0.038798066 |
| Train | 67.51147921 | 0.049731576 |
| Train | 52.46739297 | 0.00051895 |
| Train | 60.01933882 | 0.005233253 |
| Train | 60.10261583 | 0.005367881 |
| Train | 44.4305766 | 4.41632E-05 |
| Train | 92.27328996 | 0.990461113 |
| Train | 45.1664028 | 5.5341E-05 |
| Train | 60.16224369 | 0.005466389 |
| Train | 60.91395198 | 0.006873713 |
| Train | 70.48806261 | 0.115334565 |
| Train | 67.29234632 | 0.046650434 |
| Train | 76.72191682 | 0.468581499 |
| Train | 55.77221633 | 0.001428356 |
| Train | 77.66640653 | 0.54085276 |
| Train | 75.38742875 | 0.369341255 |
| Train | 48.99200032 | 0.000178835 |
| Train | 56.55995097 | 0.001817901 |
| Train | 52.46989356 | 0.000519348 |
| Train | 48.19317974 | 0.000139987 |
| Train | 61.08332744 | 0.007237494 |
| Train | 60.88299303 | 0.006809209 |
| Train | 45.6777283 | 6.47346E-05 |
| Train | 53.93385344 | 0.000813368 |
| Train | 61.78342364 | 0.008955061 |
| Train | 49.16169821 | 0.000188385 |
| Train | 46.12557891 | 7.42631E-05 |
| Train | 53.66329777 | 0.000748661 |
| Train | 53.90073692 | 0.000805157 |
| Train | 47.45575917 | 0.00011166 |
| Train | 65.65194661 | 0.028739922 |
| Train | 63.67559554 | 0.01588558 |
| Train | 54.41122631 | 0.000941464 |
| Train | 55.58630189 | 0.001349312 |
| Train | 61.47784494 | 0.008160607 |
| Train | 62.91780595 | 0.012633404 |
| Train | 55.70932379 | 0.001401112 |
| Train | 47.65706533 | 0.000118769 |
| Train | 41.14557164 | 1.61289E-05 |
| Train | 61.29655168 | 0.007722732 |
| Train | 56.2244232 | 0.001640457 |
| Train | 58.44765992 | 0.003238469 |
| Train | 60.83476948 | 0.006709933 |
| Train | 57.3370181 | 0.002305901 |
| Train | 53.13925126 | 0.000637596 |
| Train | 57.79554938 | 0.002653093 |
| Train | 67.39558261 | 0.048078702 |
| Train | 58.43460024 | 0.003225567 |
| Train | 49.07547607 | 0.00018347 |
| Train | 53.42963836 | 0.000696933 |
| Train | 69.40290762 | 0.085479594 |
| Train | 44.96229853 | 5.19837E-05 |
| Train | 51.61371579 | 0.000399477 |
| Train | 61.09213205 | 0.007256918 |
| Train | 51.98079378 | 0.000447049 |
| Train | 59.70865462 | 0.004759969 |
| Train | 56.87225484 | 0.002000233 |
| Train | 55.0924149 | 0.001159907 |
| Train | 59.46812022 | 0.004423019 |
| Train | 70.51290853 | 0.116114177 |
| Train | 72.10398424 | 0.176263505 |
| Train | 67.96778262 | 0.05677628 |
| Train | 57.65792284 | 0.002543737 |
| Train | 62.4249311 | 0.01088063 |
| Train | 59.88261628 | 0.005019466 |
| Train | 54.94478305 | 0.001108626 |
| Train | 47.69893424 | 0.000120303 |
| Train | 73.20741469 | 0.230850001 |
| Train | 70.99356077 | 0.132117161 |
| Train | 53.53560209 | 0.000719933 |
| Train | 52.00994189 | 0.000451061 |
| Train | 74.08271736 | 0.281887698 |
| Train | 66.32403122 | 0.035086534 |
| Train | 57.64772197 | 0.002535813 |
| Train | 51.33299686 | 0.000366541 |
| Train | 71.34697479 | 0.145045789 |
| Train | 46.98998375 | 9.68003E-05 |
| Train | 81.88915845 | 0.81132303 |
| Train | 38.20098003 | 6.53847E-06 |
| Train | 67.81140846 | 0.054262315 |
| Train | 66.81143952 | 0.040513498 |
| Train | 53.71891999 | 0.00076153 |
| Train | 79.30992944 | 0.660997389 |
| Train | 50.45130612 | 0.000279734 |
| Train | 55.41654716 | 0.00128096 |
| Train | 62.47482357 | 0.011046519 |
| Train | 77.36184686 | 0.517589404 |
| Train | 51.50836198 | 0.000386783 |
| Train | 50.68041257 | 0.000300086 |
| Train | 50.09677979 | 0.000250926 |
| Train | 52.34509199 | 0.000499858 |
| Train | 41.59108249 | 1.84899E-05 |
| Train | 57.14065397 | 0.002171446 |
| Train | 60.34706308 | 0.005783289 |
| Train | 81.99139601 | 0.816075237 |
| Train | 46.82583245 | 9.20489E-05 |
| Train | 48.27553367 | 0.000143567 |
| Train | 50.38762178 | 0.000274326 |
| Train | 68.23870871 | 0.061392525 |
| Train | 51.46861387 | 0.000382099 |
| Train | 47.78342382 | 0.000123461 |
| Train | 49.04779924 | 0.00018192 |
| Train | 70.28955876 | 0.109267836 |
| Train | 59.13611107 | 0.003996602 |
| Train | 56.70460464 | 0.001900195 |
| Train | 48.1630574 | 0.0001387 |
| Train | 48.32141482 | 0.000145601 |
| Train | 65.34151845 | 0.026198737 |
| Train | 51.67107263 | 0.000406562 |
| Train | 45.93688872 | 7.00885E-05 |
| Train | 51.56683678 | 0.000393778 |
| Train | 71.50477483 | 0.151149833 |
| Train | 64.12406913 | 0.018184902 |
| Train | 52.55370044 | 0.00053286 |
| Train | 67.25379189 | 0.046127469 |
| Train | 54.40573403 | 0.000939881 |
| Train | 78.08537745 | 0.572546426 |
| Train | 54.15072787 | 0.000869249 |
| Train | 51.2829417 | 0.00036096 |
| Train | 50.83273635 | 0.000314431 |
| Train | 70.63274797 | 0.119939108 |
| Train | 76.50325787 | 0.451926703 |
| Train | 54.84122085 | 0.001074011 |
| Train | 59.47766086 | 0.004435921 |
| Train | 55.64386509 | 0.001373307 |
| Train | 55.17097782 | 0.001188155 |
| Train | 47.90808068 | 0.000128271 |
| Train | 49.39204605 | 0.00020217 |
| Train | 46.61798703 | 8.63659E-05 |
| Train | 43.39482587 | 3.21465E-05 |
| Train | 39.58007973 | 9.98E-06 |
| Train | 52.15366549 | 0.000471375 |
| Train | 54.93978071 | 0.001106929 |
| Train | 63.32290966 | 0.0142805 |
| Train | 70.21103682 | 0.106946341 |
| Train | 55.71672575 | 0.001404291 |
| Train | 42.9753247 | 2.82664E-05 |
| Train | 50.64302733 | 0.000296667 |
| Train | 61.52979139 | 0.008290549 |
| Train | 43.61148836 | 3.43547E-05 |
| Train | 46.24127633 | 7.69448E-05 |
| Train | 52.94825091 | 0.000601348 |
| Train | 69.03901805 | 0.077150768 |
| Train | 57.20097232 | 0.002211893 |
| Train | 54.86496446 | 0.001081851 |
| Train | 84.81858808 | 0.913481347 |
| Train | 63.57206664 | 0.01539685 |
| Train | 84.11953595 | 0.894970308 |
| Train | 55.58936473 | 0.001350578 |
| Train | 57.22994142 | 0.002231585 |
| Train | 57.68277579 | 0.002563147 |
| Train | 67.97721086 | 0.056931295 |
| Train | 49.28486886 | 0.000195635 |
| Train | 62.76126324 | 0.012048437 |
| Train | 48.37678341 | 0.000148093 |
| Train | 52.4268532 | 0.000512542 |
| Train | 73.35599144 | 0.23903841 |
| Train | 40.84248358 | 1.46975E-05 |
| Train | 67.67402677 | 0.052140618 |
| Train | 60.20660411 | 0.005540841 |
| Train | 54.08638031 | 0.00085228 |
| Train | 46.82574441 | 9.20464E-05 |
| Train | 60.22919572 | 0.005579143 |
| Train | 52.60590568 | 0.000541454 |
| Train | 55.06791064 | 0.001151234 |
| Train | 54.06397778 | 0.00084645 |
| Train | 48.3067655 | 0.000144948 |
| Train | 65.07047684 | 0.024159839 |
| Train | 54.98098173 | 0.001120987 |
| Train | 64.07119111 | 0.017897656 |
| Train | 61.89510276 | 0.00926415 |
| Train | 86.24191519 | 0.942315307 |
| Train | 80.11820562 | 0.714142678 |
| Train | 65.06681623 | 0.024133383 |
| Train | 58.63631673 | 0.003430675 |
| Train | 55.22074814 | 0.001206405 |
| Train | 84.05111334 | 0.892981716 |
| Train | 50.80660832 | 0.000311923 |
| Train | 68.30428321 | 0.06256146 |
| Train | 57.74805146 | 0.002614832 |
| Train | 63.29973747 | 0.014180824 |
| Train | 56.34015136 | 0.001699616 |
| Train | 55.13109473 | 0.00117373 |
| Train | 70.56625652 | 0.117803615 |
| Train | 57.78249091 | 0.002642519 |
| Train | 53.9696836 | 0.000822346 |
| Train | 55.54610037 | 0.001332802 |
| Train | 48.57779428 | 0.000157507 |
| Train | 53.49507346 | 0.000711048 |
| Train | 45.5393983 | 6.20463E-05 |
| Train | 50.04734356 | 0.000247151 |
| Train | 89.13462058 | 0.975406207 |
| Train | 58.98088051 | 0.003811531 |
| Train | 74.19596209 | 0.288969879 |
| Train | 44.7884244 | 4.92849E-05 |
| Train | 53.51944551 | 0.000716378 |
| Train | 65.41319406 | 0.026765345 |
| Train | 58.76993297 | 0.003573642 |
| Train | 40.98324912 | 1.53458E-05 |
| Train | 47.68588919 | 0.000119823 |
| Train | 61.50196463 | 0.008220687 |
| Train | 53.75707469 | 0.000770485 |
| Train | 48.57087663 | 0.000157174 |
| Train | 39.55467194 | 9.90255E-06 |
| Train | 83.01054461 | 0.85845165 |
| Train | 41.11904284 | 1.59983E-05 |
| Train | 49.55835514 | 0.000212745 |
| Train | 56.85219588 | 0.001987993 |
| Train | 48.12069272 | 0.000136911 |
| Train | 46.38668124 | 8.04529E-05 |
| Train | 58.59066795 | 0.003383149 |
| Train | 56.63083434 | 0.001857772 |
| Train | 96.27283387 | 0.997182836 |
| Train | 47.88926177 | 0.000127533 |
| Train | 39.79918668 | 1.06736E-05 |
| Train | 61.47205536 | 0.008146247 |
| Train | 69.8932991 | 0.097990914 |
| Train | 49.75105517 | 0.000225692 |
| Train | 61.4251382 | 0.008030824 |
| Train | 55.60373723 | 0.001356535 |
| Train | 40.16059199 | 1.19244E-05 |
| Train | 63.35635691 | 0.014425592 |
| Train | 73.38490824 | 0.240655035 |
| Train | 50.88567015 | 0.000319575 |
| Train | 47.74905855 | 0.000122167 |
| Train | 62.93683353 | 0.012706393 |
| Train | 66.41298569 | 0.036021807 |
| Train | 69.05836339 | 0.077574203 |
| Train | 49.60421974 | 0.000215757 |
| Train | 58.12151857 | 0.00293117 |
| Train | 53.44374536 | 0.000699952 |
| Train | 52.52152385 | 0.000527631 |
| Train | 53.96423866 | 0.000820976 |
| Train | 74.83693505 | 0.330960113 |
| Train | 68.11043217 | 0.059164697 |
| Train | 69.44275442 | 0.086439603 |
| Train | 51.1031608 | 0.000341606 |
| Train | 53.27189341 | 0.000664046 |
| Train | 49.07554811 | 0.000183474 |
| Train | 65.01909067 | 0.02379111 |
| Train | 53.14014831 | 0.000637771 |
| Train | 51.58888407 | 0.000396448 |
| Train | 53.58549909 | 0.000731025 |
| Train | 46.62846265 | 8.66437E-05 |
| Train | 68.72505511 | 0.070569308 |
| Train | 54.88783768 | 0.001089457 |
| Train | 58.09445532 | 0.002907016 |
| Train | 57.71304337 | 0.002586985 |
| Train | 72.6992682 | 0.20434848 |
| Train | 43.34117068 | 3.1622E-05 |
| Train | 56.14303131 | 0.001600086 |
| Train | 73.23925633 | 0.232588201 |
| Train | 71.63037343 | 0.156157919 |
| Train | 58.32196708 | 0.003116407 |
| Train | 53.71821913 | 0.000761366 |
| Train | 68.53341399 | 0.066810943 |
| Train | 47.22024147 | 0.000103881 |
| Train | 53.45148244 | 0.000701613 |
| Train | 59.01518041 | 0.003851676 |
| Train | 63.56296213 | 0.015354582 |
| Train | 54.52619133 | 0.000975212 |
| Train | 62.71574754 | 0.011883433 |
| Train | 55.24842287 | 0.001216674 |
| Train | 72.69997075 | 0.204383501 |
| Train | 49.16141822 | 0.000188369 |
| Train | 51.66409422 | 0.000405694 |
| Train | 46.94453903 | 9.54609E-05 |
| Train | 69.54955856 | 0.089061151 |
| Train | 74.19286659 | 0.288774978 |
| Train | 58.16233343 | 0.002967975 |
| Train | 55.57223542 | 0.001343512 |
| Train | 70.42250033 | 0.113299076 |
| Train | 58.74129068 | 0.003542503 |
| Train | 65.42016952 | 0.026821117 |
| Train | 52.62293839 | 0.000544287 |
| Train | 48.64805792 | 0.000160937 |
| Train | 66.0425105 | 0.032278423 |
| Train | 54.39101818 | 0.000935653 |
| Train | 49.86107382 | 0.000233434 |
| Train | 51.66116263 | 0.000405329 |
| Train | 48.05243807 | 0.000134075 |
| Train | 40.79483751 | 1.44843E-05 |
| Train | 54.09390609 | 0.000854247 |
| Train | 53.07291731 | 0.000624766 |
| Train | 46.37680303 | 8.02096E-05 |
| Train | 48.32021008 | 0.000145547 |
| Train | 81.50911739 | 0.79283428 |
| Train | 45.34763085 | 5.85032E-05 |
| Train | 65.43779619 | 0.026962545 |
| Train | 52.38232919 | 0.000505595 |
| Train | 42.81572168 | 2.69164E-05 |
| Train | 52.50392132 | 0.000524792 |
| Train | 58.1710479 | 0.002975893 |
| Train | 45.70846974 | 6.53477E-05 |
| Train | 49.94075642 | 0.000239206 |
| Train | 63.70302313 | 0.016017601 |
| Train | 49.22987765 | 0.000192364 |
| Train | 65.12979848 | 0.02459242 |
| Train | 68.19012924 | 0.060539777 |
| Train | 76.84535738 | 0.478017092 |
| Train | 78.79083459 | 0.62447066 |
| Train | 45.96589777 | 7.07147E-05 |
| Train | 54.53471658 | 0.000977762 |
| Train | 68.2855949 | 0.062226245 |
| Train | 77.62335625 | 0.537572837 |
| Train | 45.83006536 | 6.783E-05 |
| Train | 46.51133782 | 8.35874E-05 |
| Train | 54.98417257 | 0.001122083 |
| Train | 78.91660653 | 0.633470492 |
| Train | 49.26444558 | 0.000194414 |
| Train | 60.14164855 | 0.005432165 |
| Train | 45.62271124 | 6.36517E-05 |
| Train | 100.3604805 | 0.999194006 |
| Train | 85.34556145 | 0.925428082 |
| Train | 55.280881 | 0.001228829 |
| Train | 62.14095519 | 0.00998231 |
| Train | 90.66324193 | 0.984466365 |
| Train | 51.09876898 | 0.000341147 |
| Train | 67.55005199 | 0.050293502 |
| Train | 72.30524231 | 0.185403602 |
| Train | 62.26338137 | 0.010360217 |
| Train | 69.72759142 | 0.093590598 |
| Train | 49.09627496 | 0.000184644 |
| Train | 55.07723412 | 0.001154527 |
| Train | 55.63070762 | 0.001367785 |
| Train | 62.95408603 | 0.012772927 |
| Train | 81.37443427 | 0.785968948 |
| Train | 66.22957329 | 0.034119027 |
| Train | 47.37034695 | 0.000108774 |
| Train | 74.09064086 | 0.282379802 |
| Train | 70.69154371 | 0.121855209 |
| Train | 59.74313103 | 0.004810314 |
| Train | 73.60871028 | 0.253417926 |
| Train | 74.78534859 | 0.327466936 |
| Train | 95.92382323 | 0.996865618 |
| Train | 54.00917678 | 0.000832357 |
| Train | 69.02735088 | 0.076896435 |
| Train | 75.58210932 | 0.383351321 |
| Train | 70.33336487 | 0.1105821 |
| Train | 68.06314736 | 0.058362736 |
| Train | 65.01475989 | 0.023760288 |
| Train | 70.82622832 | 0.126344007 |
| Train | 53.68409756 | 0.000753447 |
| Train | 61.35346141 | 0.007857617 |
| Train | 47.50914426 | 0.000113503 |
| Train | 48.26833466 | 0.00014325 |
| Train | 67.53580683 | 0.050085277 |
| Train | 57.98532311 | 0.002811615 |
| Train | 37.45532766 | 5.20208E-06 |
| Train | 71.37262713 | 0.146023973 |
| Train | 82.59139886 | 0.842103481 |
| Train | 74.51495889 | 0.30947482 |
| Train | 74.47363889 | 0.30677379 |
| Train | 65.65102609 | 0.028732044 |
| Train | 69.92367327 | 0.098817246 |
| Train | 48.93081344 | 0.000175511 |
| Train | 58.92609599 | 0.003748273 |
| Train | 78.42655377 | 0.59793436 |
| Train | 49.03400415 | 0.000181152 |
| Train | 75.18859189 | 0.355255967 |
| Train | 56.89029851 | 0.002011309 |
| Train | 46.58853365 | 8.55894E-05 |
| Train | 60.26527574 | 0.005640858 |
| Train | 43.81024399 | 3.65135E-05 |
| Train | 71.16485723 | 0.138257012 |
| Train | 68.58552707 | 0.067814144 |
| Train | 54.69961377 | 0.00102842 |
| Train | 53.67404941 | 0.000751131 |
| Train | 80.95420475 | 0.763495187 |
| Train | 38.58504664 | 7.35567E-06 |
| Train | 39.26781575 | 9.06873E-06 |
| Train | 54.94720629 | 0.00110945 |
| Train | 51.60355517 | 0.000398235 |
| Train | 77.56851311 | 0.533389819 |
| Train | 50.967425 | 0.000327685 |
| Train | 50.47884422 | 0.000282105 |
| Train | 74.95059393 | 0.33872218 |
| Train | 46.90960099 | 9.44437E-05 |
| Train | 51.09191558 | 0.000340431 |
| Train | 56.02376412 | 0.001542714 |
| Train | 61.38796349 | 0.007940524 |
| Train | 82.57307032 | 0.841354766 |
| Train | 53.44166332 | 0.000699506 |
| Train | 48.09992773 | 0.000136042 |
| Train | 51.23361816 | 0.000355544 |
| Train | 58.29313003 | 0.003089057 |
| Train | 48.06808357 | 0.00013472 |
| Train | 79.61524134 | 0.681649352 |
| Train | 77.58236704 | 0.534446963 |
| Train | 74.81454676 | 0.329441764 |
| Train | 41.70738501 | 1.91612E-05 |
| Train | 41.74212814 | 1.93664E-05 |
| Train | 50.27509183 | 0.000265024 |
| Train | 62.18156713 | 0.010106136 |
| Train | 59.63105608 | 0.004648564 |
| Train | 41.40356212 | 1.74567E-05 |
| Train | 78.77506343 | 0.62333595 |
| Train | 60.5980953 | 0.006243155 |
| Train | 53.47277686 | 0.000706206 |
| Train | 70.20090119 | 0.106649866 |
| Train | 52.97512199 | 0.00060632 |
| Train | 45.70270513 | 6.52322E-05 |
| Train | 53.86658757 | 0.000796776 |
| Train | 57.93398796 | 0.002767824 |
| Train | 57.17448484 | 0.00219404 |
| Train | 54.94654948 | 0.001109226 |
| Train | 44.76017162 | 4.88598E-05 |
| Train | 52.72059417 | 0.000560823 |
| Train | 69.32449685 | 0.083618675 |
| Train | 70.75966823 | 0.124108223 |
| Train | 43.92837163 | 3.78603E-05 |
| Train | 56.29088684 | 0.001674176 |
| Train | 54.30975017 | 0.000912646 |
| Train | 43.81373425 | 3.65526E-05 |
| Train | 63.63910941 | 0.015711618 |
| Train | 55.98193658 | 0.001523084 |
| Train | 46.47292516 | 8.26087E-05 |
| Train | 80.81007563 | 0.755422063 |
| Train | 53.08853498 | 0.000627763 |
| Train | 58.28239476 | 0.003078936 |
| Train | 77.13958029 | 0.50055784 |
| Train | 59.94606372 | 0.005117573 |
| Train | 52.642887 | 0.000547625 |
| Train | 46.83780492 | 9.23874E-05 |
| Train | 43.46422913 | 3.2838E-05 |
| Train | 44.11800384 | 4.0127E-05 |
| Train | 46.89216174 | 9.39401E-05 |
| Train | 52.10081535 | 0.000463801 |
| Train | 49.28992381 | 0.000195938 |
| Train | 50.89081567 | 0.000320079 |
| Train | 47.94239427 | 0.000129627 |
| Train | 76.07796221 | 0.419871597 |
| Train | 69.99180833 | 0.100693453 |
| Train | 58.06113122 | 0.002877547 |
| Train | 47.31618694 | 0.000106983 |
| Train | 46.65972407 | 8.74782E-05 |
| Train | 48.04590406 | 0.000133807 |
| Train | 44.37028365 | 4.33543E-05 |
| Train | 39.00688228 | 8.3714E-06 |
| Train | 39.36697963 | 9.34872E-06 |
| Train | 56.22268038 | 0.001639582 |
| Train | 70.91720504 | 0.129455483 |
| Train | 45.7310674 | 6.5802E-05 |
| Train | 54.0489972 | 0.000842574 |
| Train | 52.77089498 | 0.000569536 |
| Train | 38.94946618 | 8.2253E-06 |
| Train | 50.2130201 | 0.000260028 |
| Train | 51.32115717 | 0.000365213 |
| Train | 75.06482061 | 0.346611467 |
| Train | 65.12706248 | 0.024572304 |
| Train | 49.95447236 | 0.000240214 |
| Train | 55.60664703 | 0.001357744 |
| Train | 69.44831683 | 0.086574416 |
| Train | 45.71822855 | 6.55435E-05 |
| Train | 67.22220404 | 0.04570315 |
| Train | 77.58557114 | 0.534691389 |
| Train | 64.62176094 | 0.021119757 |
| Train | 66.715775 | 0.039388462 |
| Train | 46.00108591 | 7.14818E-05 |
| Train | 59.38059521 | 0.004306397 |
| Train | 51.83759811 | 0.000427853 |
| Train | 66.46112434 | 0.036537913 |
| Train | 61.32916956 | 0.007799758 |
| Train | 58.23428793 | 0.003033988 |
| Train | 63.01123076 | 0.012995784 |
| Train | 61.29900124 | 0.007728492 |
| Train | 53.37458381 | 0.000685274 |
| Train | 56.52486154 | 0.00179848 |
| Train | 50.23459847 | 0.000261754 |
| Train | 51.10060877 | 0.000341339 |
| Train | 49.67063387 | 0.000220195 |
| Train | 53.10099904 | 0.000630166 |
| Train | 50.60102066 | 0.000292871 |
| Train | 57.25098364 | 0.002245998 |
| Train | 68.23733428 | 0.061368276 |
| Train | 62.72954308 | 0.011933207 |
| Train | 51.84648468 | 0.00042902 |
| Train | 69.26096279 | 0.082137884 |
| Train | 45.02344817 | 5.29676E-05 |
| Train | 39.87117468 | 1.09118E-05 |
| Train | 76.93354827 | 0.484768283 |
| Train | 90.85585421 | 0.985344208 |
| Train | 53.17005167 | 0.000643642 |
| Train | 50.47879423 | 0.000282101 |
| Train | 48.47077243 | 0.000152423 |
| Train | 39.86759176 | 1.08998E-05 |
| Train | 43.66854019 | 3.4961E-05 |
| Train | 68.29707979 | 0.062432053 |
| Train | 61.96463864 | 0.009461915 |
| Train | 52.10495867 | 0.00046439 |
| Train | 44.90318347 | 5.105E-05 |
| Train | 60.2780161 | 0.005662815 |
| Train | 48.79455119 | 0.00016833 |
| Train | 54.48797078 | 0.00096386 |
| Train | 48.24696214 | 0.000142315 |
| Train | 48.56537343 | 0.000156909 |
| Train | 68.90214975 | 0.07421517 |
| Train | 93.78277477 | 0.993974185 |
| Train | 54.87364374 | 0.001084731 |
| Train | 57.92519024 | 0.002760388 |
| Train | 63.28829259 | 0.014131845 |
| Train | 45.34173108 | 5.83975E-05 |
| Train | 54.35970413 | 0.000926721 |
| Train | 46.85639561 | 9.29155E-05 |
| Train | 66.85464802 | 0.041031676 |
| Train | 43.8828475 | 3.73355E-05 |
| Train | 49.86482289 | 0.000233702 |
| Train | 50.15981249 | 0.000255821 |
| Train | 59.92523147 | 0.005085152 |
| Train | 69.90475964 | 0.098302001 |
| Train | 43.11977067 | 2.95465E-05 |
| Train | 56.13297052 | 0.001595165 |
| Train | 51.05207947 | 0.000336299 |
| Train | 75.9576398 | 0.410912104 |
| Train | 45.80626528 | 6.73368E-05 |
| Train | 48.41682451 | 0.000149923 |
| Train | 75.2337212 | 0.358431964 |
| Train | 59.74858395 | 0.004818325 |
| Train | 39.17229088 | 8.80695E-06 |
| Train | 61.09565961 | 0.007264715 |
| Train | 54.59191011 | 0.000995044 |
| Train | 58.07392174 | 0.002888823 |
| Train | 73.37927024 | 0.240339245 |
| Train | 62.42819183 | 0.010891397 |
| Train | 45.54500166 | 6.2153E-05 |
| Train | 46.41744966 | 8.12155E-05 |
| Train | 73.59024292 | 0.252348049 |
| Train | 56.40745986 | 0.001734998 |
| Train | 46.7504783 | 8.99466E-05 |
| Train | 74.16359737 | 0.286935113 |
| Train | 64.82150329 | 0.022423826 |
| Train | 47.6249104 | 0.000117604 |
| Train | 55.58509919 | 0.001348815 |
| Train | 45.66362389 | 6.44552E-05 |
| Train | 52.24342154 | 0.000484522 |
| Train | 76.95887583 | 0.486708274 |
| Train | 57.65274885 | 0.002539715 |
| Train | 52.8049623 | 0.000575513 |
| Train | 62.76525912 | 0.012063033 |
| Train | 42.80527425 | 2.68303E-05 |
| Train | 44.6294233 | 4.69397E-05 |
| Train | 52.53094291 | 0.000529156 |
| Train | 45.36958414 | 5.88983E-05 |
| Train | 45.54893513 | 6.2228E-05 |
| Train | 64.36843891 | 0.019572214 |
| Train | 50.64375545 | 0.000296733 |
| Train | 60.39762183 | 0.005873115 |
| Train | 62.0250406 | 0.009637091 |
| Train | 55.58784331 | 0.001349949 |
| Train | 58.63537233 | 0.003429685 |
| Train | 54.55418749 | 0.000983611 |
| Train | 62.57198454 | 0.011376781 |
| Train | 66.20880628 | 0.033909808 |
| Train | 53.48219216 | 0.000708247 |
| Train | 50.7304091 | 0.000304721 |
| Train | 52.30711473 | 0.000494074 |
| Train | 74.72987551 | 0.32373177 |
| Train | 61.54378632 | 0.008325907 |
| Train | 74.70801545 | 0.322266015 |
| Train | 60.90460362 | 0.006854172 |
| Train | 62.40219914 | 0.010805866 |
| Train | 68.8009798 | 0.07211164 |
| Train | 48.35353209 | 0.000147042 |
| Train | 74.47798562 | 0.307057228 |
| Train | 50.94328535 | 0.000325269 |
| Train | 55.69585009 | 0.001395343 |
| Train | 68.03648266 | 0.057914987 |
| Train | 51.74187825 | 0.000415482 |
| Train | 67.7477846 | 0.053269786 |
| Train | 77.18081084 | 0.503718451 |
| Train | 64.93810661 | 0.02322114 |
| Train | 80.82670186 | 0.756362853 |
| Train | 49.21887082 | 0.000191716 |
| Train | 50.42355078 | 0.000277364 |
| Train | 71.64225689 | 0.156638676 |
| Train | 47.49010729 | 0.000112842 |
| Train | 51.00814814 | 0.000331801 |
| Train | 50.66930145 | 0.000299066 |
| Train | 54.48039703 | 0.000961627 |
| Train | 48.85170184 | 0.000171305 |
| Train | 62.01129865 | 0.009596959 |
| Train | 89.67867675 | 0.979106209 |
| Train | 75.80931264 | 0.399948818 |
| Train | 48.4884903 | 0.000153253 |
| Train | 78.08247507 | 0.572328543 |
| Train | 73.59383637 | 0.252555978 |
| Train | 52.69722094 | 0.00055682 |
| Train | 51.29892044 | 0.000362732 |
| Train | 72.44852482 | 0.192131099 |
| Train | 60.91530715 | 0.00687655 |
| Train | 63.84982796 | 0.016742768 |
| Train | 56.41117022 | 0.001736969 |
| Train | 65.6697505 | 0.028892709 |
| Train | 76.5054969 | 0.452096822 |
| Train | 74.76689919 | 0.326222237 |
| Train | 54.31085711 | 0.000912956 |
| Train | 44.19895 | 4.11355E-05 |
| Train | 68.87138172 | 0.073569543 |
| Train | 49.14444703 | 0.000187391 |
| Train | 60.83419988 | 0.00670877 |
| Train | 63.53311471 | 0.015216824 |
| Train | 41.7152839 | 1.92076E-05 |
| Train | 43.76508146 | 3.60114E-05 |
| Train | 51.0028762 | 0.000331265 |
| Train | 47.89156272 | 0.000127623 |
| Train | 45.12328365 | 5.46141E-05 |
| Train | 55.5764029 | 0.001345228 |
| Train | 40.49893553 | 1.3228E-05 |
| Train | 56.62886393 | 0.001856652 |
| Train | 66.23126066 | 0.034136089 |
| Train | 66.01243766 | 0.031991604 |
| Train | 61.84959179 | 0.009136936 |
| Train | 51.47202545 | 0.000382499 |
| Train | 57.25086354 | 0.002245915 |
| Train | 66.52280428 | 0.03720959 |
| Train | 56.71660758 | 0.001907188 |
| Train | 77.98760887 | 0.565193953 |
| Train | 52.32183847 | 0.000496308 |
| Train | 55.55879713 | 0.001337995 |
| Train | 47.90553882 | 0.000128171 |
| Train | 55.06873725 | 0.001151526 |
| Train | 53.47196632 | 0.000706031 |
| Train | 80.58937343 | 0.742703352 |
| Train | 76.16987963 | 0.426752245 |
| Train | 75.78746596 | 0.398342112 |
| Train | 45.00378768 | 5.26493E-05 |
| Train | 38.6052026 | 7.40127E-06 |
| Train | 37.82112437 | 5.81956E-06 |
| Train | 60.66643544 | 0.00637452 |
| Train | 54.33594969 | 0.000920001 |
| Train | 71.50888034 | 0.151311437 |
| Train | 62.39438317 | 0.010780283 |
| Train | 50.96173399 | 0.000327114 |
| Train | 66.47536971 | 0.036691987 |
| Train | 71.73355719 | 0.160372689 |
| Train | 65.81581715 | 0.030176283 |
| Train | 47.20571664 | 0.00010342 |
| Train | 75.63736756 | 0.387364694 |
| Train | 46.02668368 | 7.2045E-05 |
| Train | 53.59849063 | 0.000733941 |
| Train | 68.94251246 | 0.075070064 |
| Train | 71.44131467 | 0.148670084 |
| Train | 58.70339981 | 0.003501725 |
| Train | 45.8553082 | 6.8357E-05 |
| Train | 44.03812831 | 3.91562E-05 |
| Train | 75.20725074 | 0.356567614 |
| Train | 79.8732657 | 0.698566649 |
| Train | 56.22557173 | 0.001641034 |
| Train | 49.43595165 | 0.000204909 |
| Train | 47.24893739 | 0.000104799 |
| Train | 61.04948061 | 0.007163301 |
| Train | 63.3659045 | 0.014467275 |
| Train | 56.85195543 | 0.001987846 |
| Train | 55.97123704 | 0.001518103 |
| Train | 51.58895428 | 0.000396457 |
| Train | 61.76362908 | 0.008901354 |
| Train | 38.41328835 | 6.97829E-06 |
| Train | 52.43062106 | 0.000513134 |
| Train | 48.58154569 | 0.000157689 |
| Train | 51.95161053 | 0.000443069 |
| Train | 54.58862502 | 0.000994043 |
| Train | 45.9545 | 7.0468E-05 |
| Train | 50.55609026 | 0.000288865 |
| Train | 48.51463908 | 0.000154487 |
| Train | 56.3895842 | 0.001725529 |
| Train | 84.88258544 | 0.915019742 |
| Train | 46.02101105 | 7.19198E-05 |
| Train | 54.82018297 | 0.001067113 |
| Train | 63.80936618 | 0.016539738 |
| Train | 49.31947272 | 0.000197721 |
| Train | 61.34313708 | 0.007832975 |
| Train | 54.24802 | 0.000895549 |
| Train | 41.12434343 | 1.60243E-05 |
| Train | 54.09151725 | 0.000853623 |
| Train | 53.89642075 | 0.000804093 |
| Train | 58.62150123 | 0.003415178 |
| Train | 73.82127231 | 0.265946612 |
| Train | 62.54028932 | 0.011267988 |
| Train | 49.41168421 | 0.00020339 |
| Train | 58.23698156 | 0.003036487 |
| Train | 48.45932955 | 0.000151889 |
| Train | 62.73160714 | 0.011940673 |
| Train | 60.84297962 | 0.006726733 |
| Train | 51.93893557 | 0.000441351 |
| Train | 50.66264221 | 0.000298456 |
| Train | 72.65958889 | 0.202377359 |
| Train | 42.50584202 | 2.44766E-05 |
| Train | 52.5405769 | 0.000530721 |
| Train | 42.49529198 | 2.43975E-05 |
| Train | 61.58231521 | 0.008424022 |
| Train | 47.51156466 | 0.000113587 |
| Train | 65.99915647 | 0.03186573 |
| Train | 48.33056295 | 0.00014601 |
| Train | 68.39428727 | 0.064199764 |
| Train | 53.03576273 | 0.000617693 |
| Train | 55.4307286 | 0.001286535 |
| Train | 61.9287514 | 0.00935933 |
| Train | 74.86343808 | 0.332762098 |
| Train | 86.08357389 | 0.939618702 |
| Train | 54.53540859 | 0.000977969 |
| Train | 74.95083975 | 0.338739082 |
| Train | 59.93979057 | 0.00510779 |
| Train | 63.71118264 | 0.016057085 |
| Train | 54.3596992 | 0.000926719 |
| Train | 74.37122242 | 0.30013592 |
| Train | 63.91651021 | 0.017082726 |
| Train | 102.4653172 | 0.999577142 |
| Train | 93.7368115 | 0.99388918 |
| Train | 73.19339418 | 0.230087525 |
| Train | 49.74710274 | 0.000225418 |
| Train | 59.30442386 | 0.004207396 |
| Train | 55.36591443 | 0.001261251 |
| Train | 57.23982613 | 0.002238345 |
| Train | 68.94887534 | 0.075205621 |
| Train | 49.7648519 | 0.000226648 |
| Train | 56.77179099 | 0.001939671 |
| Train | 68.07822581 | 0.058617333 |
| Train | 74.34988098 | 0.298763113 |
| Train | 58.06319629 | 0.002879365 |
| Train | 69.14523556 | 0.079501897 |
| Train | 52.43378037 | 0.000513631 |
| Train | 50.04434515 | 0.000246924 |
| Train | 56.4172135 | 0.001740186 |
| Train | 71.38492406 | 0.146494799 |
| Train | 44.04364153 | 3.92224E-05 |
| Train | 48.78897382 | 0.000168042 |
| Train | 42.70825295 | 2.60439E-05 |
| Train | 57.52402937 | 0.002441665 |
| Train | 57.11668075 | 0.002155577 |
| Train | 73.55062771 | 0.250063102 |
| Train | 57.76040397 | 0.00262473 |
| Train | 56.23720722 | 0.00164689 |
| Train | 62.95339547 | 0.012770257 |
| Train | 53.16274997 | 0.000642204 |
| Train | 66.88824166 | 0.041438929 |
| Train | 61.11850412 | 0.007315408 |
| Train | 53.28322895 | 0.000666357 |
| Train | 50.886496 | 0.000319656 |
| Train | 61.06875843 | 0.007205467 |
| Train | 44.27641499 | 4.21242E-05 |
| Train | 59.46007011 | 0.004412164 |
| Train | 38.30582652 | 6.75209E-06 |
| Train | 47.09074947 | 9.98377E-05 |
| Train | 79.11063252 | 0.647171647 |
| Train | 48.09852829 | 0.000135983 |
| Train | 65.68174842 | 0.028996118 |
| Train | 42.61498667 | 2.53096E-05 |
| Train | 51.81073048 | 0.000424344 |
| Train | 62.50052757 | 0.011132958 |
| Train | 45.29464558 | 5.75604E-05 |
| Train | 54.42670498 | 0.000945939 |
| Train | 64.61857961 | 0.021099595 |
| Train | 59.6070884 | 0.004614682 |
| Train | 41.0514445 | 1.56701E-05 |
| Train | 60.14846515 | 0.005443469 |
| Train | 58.69920227 | 0.003497237 |
| Train | 55.86640879 | 0.00147015 |
| Train | 65.70832987 | 0.029226477 |
| Train | 56.39043363 | 0.001725978 |
| Train | 43.24479156 | 3.07012E-05 |
| Train | 52.93468319 | 0.000598853 |
| Train | 46.07373287 | 7.30919E-05 |
| Train | 87.53376999 | 0.96043643 |
| Train | 52.7128991 | 0.000559502 |
| Train | 57.0640785 | 0.00212116 |
| Train | 68.4921438 | 0.066026205 |
| Train | 45.41006684 | 5.9634E-05 |
| Train | 71.64114385 | 0.156593587 |
| Train | 52.81774892 | 0.000577772 |
| Train | 57.54146274 | 0.00245472 |
| Train | 54.30729983 | 0.000911961 |
| Train | 84.84078883 | 0.914017817 |
| Train | 57.30189806 | 0.002281257 |
| Train | 44.77332119 | 4.90572E-05 |
| Train | 49.57749104 | 0.000213996 |
| Train | 53.10301991 | 0.000630556 |
| Train | 48.02485303 | 0.000132946 |
| Train | 52.20366736 | 0.000478654 |
| Train | 45.0610604 | 5.3582E-05 |
| Train | 56.78460512 | 0.001947293 |
| Train | 53.47727893 | 0.000707181 |
| Train | 43.22884742 | 3.05514E-05 |
| Train | 49.20677803 | 0.000191007 |
| Train | 61.45252227 | 0.008097996 |
| Train | 66.97888508 | 0.042557143 |
| Train | 50.70408387 | 0.000302272 |
| Train | 51.14396622 | 0.000345906 |
| Train | 50.56437603 | 0.0002896 |
| Train | 47.55436141 | 0.000115087 |
| Train | 63.96992112 | 0.017359917 |
| Train | 57.41787046 | 0.002363647 |
| Train | 64.71926948 | 0.021746827 |
| Train | 71.25571056 | 0.141609789 |
| Train | 47.67081151 | 0.000119271 |
| Train | 58.4695281 | 0.003260186 |
| Train | 68.0644182 | 0.058384137 |
| Train | 54.9294285 | 0.001103425 |
| Train | 61.57133913 | 0.008395955 |
| Train | 45.75179664 | 6.62216E-05 |
| Train | 62.03391991 | 0.009663113 |
| Train | 67.86640464 | 0.055134272 |
| Train | 40.7235496 | 1.41712E-05 |
| Train | 56.81406143 | 0.001964927 |
| Train | 53.23008742 | 0.000655593 |
| Train | 95.83137075 | 0.996775776 |
| Train | 36.31258058 | 3.66435E-06 |
| Train | 57.97297145 | 0.002801016 |
| Train | 47.60998163 | 0.000117067 |
| Train | 54.90750304 | 0.001096039 |
| Train | 49.11923489 | 0.000185948 |
| Train | 58.50718198 | 0.003297922 |
| Train | 44.70738226 | 4.80753E-05 |
| Train | 50.00372687 | 0.000243869 |
| Train | 59.90504497 | 0.005053932 |
| Train | 60.44479761 | 0.005958183 |
| Train | 49.00936061 | 0.000179789 |
| Train | 50.48210581 | 0.000282387 |
| Train | 46.87866796 | 9.35522E-05 |
| Train | 59.97979416 | 0.005170505 |
| Train | 66.33682466 | 0.035219602 |
| Train | 55.71967616 | 0.00140556 |
| Train | 56.14850839 | 0.001602772 |
| Train | 52.51245765 | 0.000526167 |
| Train | 58.25739036 | 0.003055491 |
| Train | 50.10950652 | 0.000251906 |
| Train | 58.88456465 | 0.003701017 |
| Train | 47.71436865 | 0.000120874 |
| Train | 62.86042713 | 0.012415807 |
| Train | 64.41037149 | 0.019820475 |
| Train | 55.70467238 | 0.001399117 |
| Train | 55.78409405 | 0.00143356 |
| Train | 71.05262098 | 0.134207494 |
| Train | 51.68602019 | 0.000408429 |
| Train | 64.08948751 | 0.017996534 |
| Train | 63.15508252 | 0.013573908 |
| Train | 64.19360829 | 0.018569551 |
| Train | 45.1476343 | 5.50234E-05 |
| Train | 56.33696335 | 0.001697958 |
| Train | 39.55282443 | 9.89694E-06 |
| Train | 42.74925902 | 2.63734E-05 |
| Train | 52.07166908 | 0.000459676 |
| Train | 60.96049631 | 0.006971831 |
| Train | 71.4364816 | 0.14848261 |
| Train | 56.47437346 | 0.001770901 |
| Train | 52.54681087 | 0.000531736 |
| Train | 69.19236817 | 0.080566008 |
| Train | 75.92333187 | 0.40836801 |
| Train | 82.4192684 | 0.83495799 |
| Train | 53.14689953 | 0.000639092 |
| Train | 55.09643849 | 0.001161338 |
| Train | 56.35444916 | 0.001707071 |
| Train | 53.99956743 | 0.00082991 |
| Train | 45.94361792 | 7.02333E-05 |
| Train | 61.58490345 | 0.008430654 |
| Train | 62.75525148 | 0.012026515 |
| Train | 57.17711218 | 0.002195805 |
| Train | 64.63877491 | 0.021227885 |
| Train | 59.88559012 | 0.005024023 |
| Train | 76.93739045 | 0.485062532 |
| Train | 43.29390812 | 3.1167E-05 |
| Train | 51.94657772 | 0.000442386 |
| Train | 46.72018397 | 8.9115E-05 |
| Train | 72.08408763 | 0.175379383 |
| Train | 63.07493587 | 0.013248748 |
| Train | 63.46747457 | 0.01491812 |
| Train | 65.25966608 | 0.025565962 |
| Train | 58.54332201 | 0.00333455 |
| Train | 46.47208663 | 8.25875E-05 |
| Train | 68.35168024 | 0.06341928 |
| Train | 57.72913957 | 0.002599751 |
| Train | 62.87144168 | 0.012457288 |
| Train | 59.80355689 | 0.004899833 |
| Train | 84.77984598 | 0.912537816 |
| Train | 68.32256613 | 0.062891098 |
| Train | 74.11840653 | 0.284108373 |
| Train | 73.76395408 | 0.262529615 |
| Train | 57.81577924 | 0.002669558 |
| Train | 62.04391617 | 0.009692492 |
| Train | 47.2670671 | 0.000105383 |
| Train | 71.3853704 | 0.146511896 |
| Train | 72.78127396 | 0.208467386 |
| Train | 41.90534849 | 2.03603E-05 |
| Train | 82.58037447 | 0.841653444 |
| Train | 38.45322622 | 7.06428E-06 |
| Train | 59.23789086 | 0.004122779 |
| Train | 73.65514213 | 0.256121127 |
| Train | 52.53048488 | 0.000529082 |
| Train | 49.39603457 | 0.000202417 |
| Train | 52.59100194 | 0.000538986 |
| Train | 43.45324311 | 3.27276E-05 |
| Train | 51.85024377 | 0.000429514 |
| Train | 65.11993843 | 0.024520007 |
| Train | 57.52130252 | 0.002439629 |
| Train | 78.42837512 | 0.598068646 |
| Train | 68.45842402 | 0.065391452 |
| Train | 67.1970953 | 0.045368521 |
| Train | 52.81630326 | 0.000577517 |
| Train | 83.26529733 | 0.867680663 |
| Train | 58.68284034 | 0.003479796 |
| Train | 47.11708357 | 0.000100647 |
| Train | 50.20126189 | 0.000259093 |
| Train | 81.29947059 | 0.782076669 |
| Train | 79.45103834 | 0.6706245 |
| Train | 69.62607815 | 0.090983146 |
| Train | 58.49092486 | 0.003281575 |
| Train | 71.97458503 | 0.170576139 |
| Train | 45.21981213 | 5.62547E-05 |
| Train | 57.53040862 | 0.002446434 |
| Train | 74.36832627 | 0.299949395 |
| Train | 63.05474908 | 0.013168068 |
| Train | 60.72220558 | 0.006483758 |
| Train | 65.66381005 | 0.02884164 |
| Train | 81.3563865 | 0.785036512 |
| Train | 46.32451373 | 7.89338E-05 |
| Train | 73.02639317 | 0.221141645 |
| Train | 55.69651957 | 0.001395629 |
| Train | 45.11598887 | 5.44921E-05 |
| Train | 71.84320877 | 0.164952013 |
| Train | 46.66435662 | 8.76025E-05 |
| Train | 59.03174874 | 0.003871218 |
| Train | 60.15379178 | 0.005452319 |
| Train | 49.97596727 | 0.000241802 |
| Train | 60.39903802 | 0.005875653 |
| Train | 54.73490462 | 0.001039598 |
| Train | 49.47429837 | 0.000207332 |
| Train | 59.5399879 | 0.004521129 |
| Train | 63.29432944 | 0.01415766 |
| Train | 72.76852984 | 0.207823296 |
| Train | 74.62607949 | 0.316803224 |
| Train | 56.61461095 | 0.00184857 |
| Train | 84.31883099 | 0.900577566 |
| Train | 50.49675521 | 0.000283658 |
| Train | 77.45003511 | 0.524337815 |
| Train | 57.94102783 | 0.002773789 |
| Train | 46.97370052 | 9.63182E-05 |
| Train | 65.80693905 | 0.03009671 |
| Train | 50.39979973 | 0.000275352 |
| Train | 52.48104832 | 0.000521126 |
| Train | 52.27297448 | 0.000488931 |
| Train | 61.15327233 | 0.007393238 |
| Train | 83.62365022 | 0.879794931 |
| Train | 49.18187621 | 0.000189554 |
| Train | 63.50591909 | 0.015092359 |
| Train | 44.26571006 | 4.19862E-05 |
| Train | 50.37327782 | 0.000273122 |
| Train | 60.0864956 | 0.005341554 |
| Train | 64.19356426 | 0.018569305 |
| Train | 61.35798458 | 0.007868436 |
| Train | 54.6524341 | 0.001013664 |
| Train | 139.5524653 | 0.999999995 |
| Train | 62.73455239 | 0.011951334 |
| Train | 71.26289046 | 0.141877675 |
| Train | 46.93134604 | 9.50755E-05 |
| Train | 51.62607753 | 0.000400994 |
| Train | 52.24007383 | 0.000484025 |
| Train | 44.5944331 | 4.64388E-05 |
| Train | 44.78149946 | 4.91803E-05 |
| Train | 77.49231068 | 0.527569947 |
| Train | 55.58075371 | 0.001347021 |
| Train | 48.63110661 | 0.000160103 |
| Train | 82.19815319 | 0.825401268 |
| Train | 52.69410584 | 0.000556289 |
| Train | 54.43010173 | 0.000946924 |
| Train | 59.32123343 | 0.004229047 |
| Train | 63.66739799 | 0.015846331 |
| Train | 43.20949807 | 3.03707E-05 |
| Train | 47.83136216 | 0.000125289 |
| Train | 59.29788699 | 0.004199007 |
| Train | 52.4835545 | 0.000521526 |
| Train | 83.33586568 | 0.870145344 |
| Train | 50.40918293 | 0.000276145 |
| Train | 45.96563481 | 7.0709E-05 |
| Train | 45.72368392 | 6.56532E-05 |
| Train | 80.31212148 | 0.726125196 |
| Train | 72.81204741 | 0.210028743 |
| Train | 71.02491157 | 0.133223248 |
| Train | 77.5833028 | 0.534518318 |
| Train | 50.42889142 | 0.000277818 |
| Train | 61.12991463 | 0.007340859 |
| Train | 81.78296081 | 0.806287587 |
| Train | 71.0511635 | 0.134155553 |
| Train | 79.86502267 | 0.698034182 |
| Train | 63.49582507 | 0.015046418 |
| Train | 57.51004706 | 0.002431244 |
| Train | 45.4963343 | 6.12324E-05 |
| Train | 52.14083099 | 0.000469524 |
| Train | 46.82336118 | 9.19792E-05 |
| Train | 50.94259522 | 0.0003252 |
| Train | 75.37425721 | 0.368400944 |
| Train | 64.54884297 | 0.020662422 |
| Train | 51.47782154 | 0.000383179 |
| Train | 73.97037174 | 0.274966903 |
| Train | 59.40982932 | 0.004345006 |
| Train | 47.84769896 | 0.000125918 |
| Train | 57.13136497 | 0.002165283 |
| Train | 50.37380179 | 0.000273166 |
| Train | 56.46327793 | 0.001764897 |
| Train | 54.05398731 | 0.000843864 |
| Train | 46.90412436 | 9.42853E-05 |
| Train | 60.14438884 | 0.005436706 |
| Train | 47.69154528 | 0.000120031 |
| Train | 66.77841909 | 0.040121722 |
| Train | 68.79865807 | 0.07206403 |
| Train | 59.02540438 | 0.003863723 |
| Train | 51.34352402 | 0.000367726 |
| Train | 56.33562175 | 0.001697261 |
| Train | 56.46787943 | 0.001767384 |
| Train | 57.51665021 | 0.002436159 |
| Train | 52.57922589 | 0.000537044 |
| Train | 46.59217682 | 8.56851E-05 |
| Train | 62.04407264 | 0.009692949 |
| Train | 58.36326314 | 0.003155996 |
| Train | 47.61861104 | 0.000117377 |
| Train | 59.87130311 | 0.00500217 |
| Train | 57.60985182 | 0.00250661 |
| Train | 69.46752796 | 0.087041355 |
| Train | 53.98916498 | 0.00082727 |
| Train | 64.52139288 | 0.020492776 |
| Train | 46.21209171 | 7.62593E-05 |
| Train | 47.90237976 | 0.000128047 |
| Train | 82.96980049 | 0.856926688 |
| Train | 72.30519083 | 0.185401243 |
| Train | 65.2861177 | 0.025768813 |
| Train | 45.55351546 | 6.23155E-05 |
| Train | 45.78283067 | 6.68547E-05 |
| Train | 40.66813613 | 1.39324E-05 |
| Train | 55.13589114 | 0.001175456 |
| Train | 65.68073523 | 0.028987357 |
| Train | 44.86058062 | 5.03874E-05 |
| Train | 61.40280989 | 0.007976468 |
| Train | 49.90752922 | 0.000236782 |
| Train | 53.25557357 | 0.000660734 |
| Train | 48.25453659 | 0.000142646 |
| Train | 42.02541393 | 2.11239E-05 |
| Train | 73.28141917 | 0.234903853 |
| Train | 51.22276511 | 0.000354363 |
| Train | 54.29215788 | 0.000907741 |
| Train | 44.46357262 | 4.46123E-05 |
| Train | 67.7973731 | 0.05404187 |
| Train | 59.23902907 | 0.00412421 |
| Train | 38.143517 | 6.42427E-06 |
| Train | 40.81417285 | 1.45705E-05 |
| Train | 53.62800403 | 0.000740608 |
| Train | 44.44864803 | 4.44086E-05 |
| Train | 53.34347776 | 0.000678773 |
| Train | 75.11893925 | 0.350379229 |
| Train | 39.36746421 | 9.35011E-06 |
| Train | 45.34998615 | 5.85455E-05 |
| Train | 47.04108015 | 9.83288E-05 |
| Train | 45.04340683 | 5.32928E-05 |
| Train | 51.92216108 | 0.000439087 |
| Train | 38.18905018 | 6.51459E-06 |
| Train | 49.72381932 | 0.000223815 |
| Train | 52.8470112 | 0.000582977 |
| Train | 69.00460058 | 0.076402724 |
| Train | 47.75123878 | 0.000122248 |
| Train | 40.19295429 | 1.20433E-05 |
| Train | 53.9786201 | 0.000824601 |
| Train | 56.47139316 | 0.001769286 |
| Train | 64.83151117 | 0.022491194 |
| Train | 49.84271589 | 0.000232124 |
| Train | 65.75787437 | 0.029660612 |
| Train | 58.50723847 | 0.003297979 |
| Train | 89.40327298 | 0.977306865 |
| Train | 75.9680897 | 0.411688036 |
| Train | 71.46322224 | 0.149522336 |
| Train | 59.39525889 | 0.004325718 |
| Train | 49.9419993 | 0.000239297 |
| Train | 61.49807705 | 0.008210973 |
| Train | 45.54504873 | 6.21539E-05 |
| Train | 46.7820192 | 9.08206E-05 |
| Train | 47.85496409 | 0.000126199 |
| Train | 46.04128237 | 7.23682E-05 |
| Train | 58.82485114 | 0.003634111 |
| Train | 42.20236761 | 2.23017E-05 |
| Train | 55.49772492 | 0.001313204 |
| Train | 77.60841688 | 0.536433815 |
| Train | 47.00810231 | 9.73396E-05 |
| Train | 75.74230201 | 0.395027824 |
| Train | 76.4867692 | 0.450674726 |
| Train | 47.9332362 | 0.000129264 |
| Train | 77.60596185 | 0.536246882 |
| Train | 57.82348465 | 0.002675856 |
| Train | 57.94056582 | 0.002773398 |
| Train | 72.02803854 | 0.172907654 |
| Train | 58.76717512 | 0.003570632 |
| Train | 67.59620083 | 0.050973752 |
| Train | 46.41693763 | 8.12027E-05 |
| Train | 57.15434239 | 0.00218056 |
| Train | 63.03382226 | 0.013084943 |
| Train | 51.89200096 | 0.000435047 |
| Train | 52.77048136 | 0.000569463 |
| Train | 57.25516291 | 0.002248872 |
| Train | 45.73179997 | 6.58168E-05 |
| Train | 42.00523579 | 2.09936E-05 |
| Train | 66.93634825 | 0.042028865 |
| Train | 90.41644357 | 0.983265647 |
| Train | 57.52808557 | 0.002444696 |
| Train | 70.6367408 | 0.120068374 |
| Train | 42.80638843 | 2.68395E-05 |
| Train | 50.27384422 | 0.000264922 |
| Train | 57.12335339 | 0.002159982 |
| Train | 61.96376215 | 0.009459395 |
| Train | 46.66708904 | 8.7676E-05 |
| Train | 47.76048662 | 0.000122595 |
| Train | 59.85639758 | 0.004979473 |
| Train | 69.75776245 | 0.094378324 |
| Train | 47.49447345 | 0.000112993 |
| Train | 60.82421183 | 0.006688392 |
| Train | 47.78286036 | 0.000123439 |
| Train | 49.57445945 | 0.000213798 |
| Train | 61.26342494 | 0.00764528 |
| Train | 71.33379295 | 0.144545285 |
| Train | 47.4391437 | 0.000111093 |
| Train | 52.42601955 | 0.000512411 |
| Train | 54.90918229 | 0.001096603 |
| Train | 46.46862984 | 8.25E-05 |
| Train | 62.79669581 | 0.012178449 |
| Train | 58.70969828 | 0.003508471 |
| Train | 50.83544185 | 0.000314692 |
| Train | 59.23637303 | 0.004120868 |
| Train | 61.57893273 | 0.008415361 |
| Train | 71.86304346 | 0.165791532 |
| Train | 66.45227014 | 0.036442458 |
| Train | 59.88606393 | 0.005024749 |
| Train | 58.61093704 | 0.00340417 |
| Train | 51.31149504 | 0.000364133 |
| Train | 67.95676158 | 0.056595583 |
| Train | 65.23427022 | 0.02537267 |
| Train | 62.69442725 | 0.011806913 |
| Train | 52.11389706 | 0.000465664 |
| Train | 60.4159242 | 0.005905976 |
| Train | 80.17501635 | 0.717685494 |
| Train | 52.98898882 | 0.000608902 |
| Train | 46.6930573 | 8.83768E-05 |
| Train | 59.86624811 | 0.004994463 |
| Train | 62.60470962 | 0.011490198 |
| Train | 47.32752647 | 0.000107355 |
| Train | 63.85324347 | 0.016760024 |
| Train | 74.06500575 | 0.280789635 |
| Train | 46.28996187 | 7.8102E-05 |
| Train | 66.60534103 | 0.038126958 |
| Train | 75.10349938 | 0.34930244 |
| Train | 66.88255202 | 0.041369681 |
| Train | 65.94342574 | 0.031342739 |
| Train | 60.74140707 | 0.006521796 |
| Train | 43.10680865 | 2.94293E-05 |
| Train | 73.29253444 | 0.235516979 |
| Train | 45.47987882 | 6.09243E-05 |
| Train | 69.93385109 | 0.099095521 |
| Train | 60.37496688 | 0.005832694 |
| Train | 75.72302318 | 0.39361596 |
| Train | 58.88582929 | 0.003702449 |
| Train | 62.09990553 | 0.009858675 |
| Train | 60.99430143 | 0.007043963 |
| Train | 45.42222021 | 5.98566E-05 |
| Train | 57.34066956 | 0.002308478 |
| Train | 57.15098354 | 0.00217832 |
| Train | 71.97708072 | 0.170684426 |
| Train | 50.3683234 | 0.000272707 |
| Train | 63.72539035 | 0.016126058 |
| Train | 63.62280161 | 0.015634479 |
| Train | 68.75822667 | 0.071239391 |
| Train | 49.63756554 | 0.000217974 |
| Train | 50.46984774 | 0.000281328 |
| Train | 59.29736595 | 0.004198338 |
| Train | 49.98600225 | 0.000242547 |
| Train | 41.83101434 | 1.99015E-05 |
| Train | 82.58978872 | 0.842037853 |
| Train | 52.45629709 | 0.000517188 |
| Train | 41.43219592 | 1.76106E-05 |
| Train | 79.87962878 | 0.698977439 |
| Train | 56.86620712 | 0.001996535 |
| Train | 50.82182248 | 0.000313381 |
| Train | 64.63634472 | 0.021212398 |
| Train | 67.40764465 | 0.048248263 |
| Train | 53.46029136 | 0.00070351 |
| Train | 56.4749667 | 0.001771222 |
| Train | 61.60740888 | 0.00848854 |
| Train | 68.67482228 | 0.069565672 |
| Train | 52.94743568 | 0.000601198 |
| Train | 66.22125682 | 0.034035095 |
| Train | 60.67548831 | 0.006392127 |
| Train | 55.71168232 | 0.001402124 |
| Train | 71.26048183 | 0.141787726 |
| Train | 48.67137722 | 0.000162092 |
| Train | 54.30736704 | 0.00091198 |
| Train | 78.71606852 | 0.619079192 |
| Train | 55.50252296 | 0.001315135 |
| Train | 52.00310164 | 0.000450117 |
| Train | 43.75375649 | 3.58866E-05 |
| Train | 46.44786429 | 8.19764E-05 |
| Train | 53.93597342 | 0.000813897 |
| Train | 48.95856637 | 0.000177011 |
| Train | 53.85126292 | 0.000793044 |
| Train | 37.10574441 | 4.6733E-06 |
| Train | 65.24503298 | 0.025454413 |
| Train | 55.33855574 | 0.001250727 |
| Train | 55.95193993 | 0.001509159 |
| Train | 46.32767813 | 7.90105E-05 |
| Train | 43.78088138 | 3.61863E-05 |
| Train | 74.83681438 | 0.330951937 |
| Train | 83.65963733 | 0.880957128 |
| Train | 66.08861779 | 0.032722991 |
| Train | 62.07753523 | 0.009791942 |
| Train | 44.06925345 | 3.95317E-05 |
| Train | 41.52917442 | 1.81422E-05 |
| Train | 59.16444225 | 0.004031334 |
| Train | 54.01562954 | 0.000834004 |
| Train | 81.84150793 | 0.809076085 |
| Train | 50.39511645 | 0.000274957 |
| Train | 59.72587852 | 0.004785055 |
| Train | 57.7699464 | 0.0026324 |
| Train | 43.54758745 | 3.36881E-05 |
| Train | 77.86664633 | 0.556057667 |
| Train | 70.54834917 | 0.11723411 |
| Train | 59.01462374 | 0.003851021 |
| Train | 45.87577801 | 6.87874E-05 |
| Train | 61.85427647 | 0.009149951 |
| Train | 81.2594973 | 0.779980438 |
| Train | 68.67713687 | 0.069611615 |
| Train | 61.95022859 | 0.00942059 |
| Train | 64.91767659 | 0.023079485 |
| Train | 49.62068833 | 0.000216849 |
| Train | 60.52612894 | 0.006107724 |
| Train | 107.6886508 | 0.99991474 |
| Train | 54.08733189 | 0.000852529 |
| Train | 62.27139587 | 0.010385445 |
| Train | 37.62976772 | 5.48792E-06 |
| Train | 62.13859385 | 0.009975159 |
| Train | 65.37953181 | 0.02649778 |
| Train | 58.79616943 | 0.003602405 |
| Train | 55.52702482 | 0.00132504 |
| Train | 59.21228444 | 0.004090665 |
| Train | 60.10619592 | 0.005373744 |
| Train | 45.44456719 | 6.02682E-05 |
| Train | 89.76650718 | 0.979650099 |
| Train | 40.31365215 | 1.24974E-05 |
| Train | 46.46761426 | 8.24743E-05 |
| Train | 91.18241125 | 0.986722128 |
| Train | 48.42959503 | 0.000150511 |
| Train | 47.95584128 | 0.000130163 |
| Train | 84.78559294 | 0.912678354 |
| Train | 65.09596286 | 0.024344764 |
| Train | 72.20129234 | 0.18063787 |
| Train | 75.63142939 | 0.386932637 |
| Train | 57.56848889 | 0.002475097 |
| Train | 59.15770896 | 0.004023052 |
| Train | 86.78983669 | 0.95079771 |
| Train | 77.89323244 | 0.558069167 |
| Train | 60.76039526 | 0.00655963 |
| Train | 79.19215492 | 0.652858354 |
| Train | 48.02109566 | 0.000132793 |
| Train | 72.61666495 | 0.20026103 |
| Train | 77.57340284 | 0.533762984 |
| Train | 74.00717667 | 0.277222596 |
| Train | 73.70469644 | 0.259026827 |
| Train | 51.53063413 | 0.000389433 |
| Train | 80.27574356 | 0.723901276 |
| Train | 48.5737864 | 0.000157314 |
| Train | 47.85974756 | 0.000126384 |
| Train | 69.69125831 | 0.092649686 |
| Train | 44.73528638 | 4.84884E-05 |
| Train | 75.50003567 | 0.377419806 |
| Train | 74.27209875 | 0.293790357 |
| Train | 71.97021396 | 0.170386537 |
| Train | 60.60330027 | 0.006253064 |
| Train | 75.70409056 | 0.392231088 |
| Train | 72.99595551 | 0.219538262 |
| Train | 45.50157299 | 6.13309E-05 |
| Train | 58.71316944 | 0.003512195 |
| Train | 55.73543282 | 0.001412358 |
| Train | 43.32159918 | 3.14328E-05 |
| Train | 72.59693075 | 0.199293625 |
| Train | 51.19534636 | 0.000351397 |
| Train | 67.84412864 | 0.054779503 |
| Train | 68.22075568 | 0.061076066 |
| Train | 58.31540694 | 0.003110164 |
| Train | 80.2714376 | 0.723637176 |
| Train | 60.02003182 | 0.005234358 |
| Train | 69.25969474 | 0.082108576 |
| Train | 65.2737102 | 0.025673472 |
| Train | 62.16211685 | 0.010046643 |
| Train | 50.36498268 | 0.000272428 |
| Train | 43.77658574 | 3.61386E-05 |
| Train | 57.21005576 | 0.002218049 |
| Train | 46.02756152 | 7.20644E-05 |
| Train | 52.87813736 | 0.000588565 |
| Train | 72.17447303 | 0.179423761 |
| Train | 71.80385337 | 0.163296495 |
| Train | 50.2396948 | 0.000262163 |
| Train | 63.05010703 | 0.013149584 |
| Train | 49.40872969 | 0.000203206 |
| Train | 55.06972519 | 0.001151874 |
| Train | 68.82706304 | 0.07264865 |
| Train | 55.26667995 | 0.001223496 |
| Train | 52.98308357 | 0.000607801 |
| Train | 81.16182237 | 0.77479743 |
| Train | 72.85267781 | 0.212103327 |
| Train | 58.03537172 | 0.002854973 |
| Train | 53.40084453 | 0.000690811 |
| Train | 56.90275502 | 0.00201899 |
| Train | 55.56264997 | 0.001339574 |
| Train | 53.95755522 | 0.000819296 |
| Train | 55.19243201 | 0.001195988 |
| Train | 61.22570411 | 0.007558026 |
| Train | 60.41869943 | 0.005910972 |
| Train | 59.42665053 | 0.004367377 |
| Train | 76.63582163 | 0.462013377 |
| Train | 61.49318274 | 0.008198762 |
| Train | 59.46948495 | 0.004424862 |
| Train | 46.7104866 | 8.88504E-05 |
| Train | 54.67637704 | 0.001021126 |
| Train | 68.4519311 | 0.065269876 |
| Train | 55.31881922 | 0.00124319 |
| Train | 63.75409332 | 0.0162663 |
| Train | 78.95301505 | 0.636058681 |
| Train | 49.49312924 | 0.000208533 |
| Train | 76.73509529 | 0.469587803 |
| Train | 50.27946808 | 0.000265379 |
| Train | 75.53662948 | 0.380059978 |
| Train | 65.60403059 | 0.028332615 |
| Train | 67.10461763 | 0.044156088 |
| Train | 53.31497364 | 0.00067287 |
| Train | 54.53559306 | 0.000978025 |
| Train | 57.3375742 | 0.002306293 |
| Train | 50.34055417 | 0.000270396 |
| Train | 41.74627563 | 1.9391E-05 |
| Train | 51.60732805 | 0.000398696 |
| Train | 56.00446085 | 0.001533623 |
| Train | 50.14740589 | 0.00025485 |
| Train | 49.36868515 | 0.000200727 |
| Train | 66.39032524 | 0.035781314 |
| Train | 56.98112911 | 0.002067998 |
| Train | 51.03001998 | 0.000334033 |
| Train | 64.86782795 | 0.022737327 |
| Train | 44.45884082 | 4.45476E-05 |
| Train | 43.99658614 | 3.86606E-05 |
| Train | 68.77476634 | 0.071575696 |
| Train | 45.31040409 | 5.78392E-05 |
| Train | 76.810461 | 0.475347796 |
| Train | 44.10692438 | 3.9991E-05 |
| Train | 86.058052 | 0.939173144 |
| Train | 63.50752887 | 0.015099697 |
| Train | 52.32297435 | 0.000496481 |
| Train | 75.41773349 | 0.371508346 |
| Train | 44.3708211 | 4.33614E-05 |
| Train | 42.84387257 | 2.71497E-05 |
| Train | 48.79272713 | 0.000168236 |
| Train | 113.0154622 | 0.999983351 |
| Train | 42.30779096 | 2.30344E-05 |
| Train | 59.33257826 | 0.004243722 |
| Train | 47.06971933 | 9.9196E-05 |
| Train | 58.6902228 | 0.003487655 |
| Train | 50.81745101 | 0.000312961 |
| Train | 57.33152512 | 0.002302029 |
| Train | 49.43056713 | 0.000204571 |
| Train | 44.23310383 | 4.15685E-05 |
| Train | 66.89968615 | 0.041578548 |
| Train | 42.53223518 | 2.46755E-05 |
| Train | 59.55481495 | 0.004541637 |
| Train | 63.96078068 | 0.017312165 |
| Train | 49.21559572 | 0.000191524 |
| Train | 78.38030599 | 0.594520441 |
| Train | 45.01158111 | 5.27752E-05 |
| Train | 59.06000206 | 0.00390477 |
| Train | 54.75606727 | 0.001046359 |
| Train | 79.19190256 | 0.652840901 |
| Train | 58.82949145 | 0.003639265 |
| Train | 57.58156748 | 0.002485018 |
| Train | 48.28035072 | 0.000143779 |
| Train | 43.98425941 | 3.85147E-05 |
| Train | 51.70401236 | 0.000410688 |
| Train | 91.58578317 | 0.988248788 |
| Train | 72.14180428 | 0.177953617 |
| Train | 55.12865378 | 0.001172853 |
| Train | 61.83711679 | 0.009102368 |
| Train | 84.72913648 | 0.91128876 |
| Train | 71.605748 | 0.15516544 |
| Train | 47.53457538 | 0.000114391 |
| Train | 56.11311223 | 0.001585497 |
| Train | 53.16940474 | 0.000643515 |
| Train | 52.69292442 | 0.000556088 |
| Train | 76.80462551 | 0.474901562 |
| Train | 85.29404482 | 0.924330567 |
| Train | 74.29866798 | 0.295483501 |
| Train | 46.62067911 | 8.64372E-05 |
| Train | 50.24442599 | 0.000262544 |
| Train | 46.50091765 | 8.33208E-05 |
| Train | 64.57044524 | 0.020796889 |
| Train | 55.5472394 | 0.001333267 |
| Train | 61.82062062 | 0.009056855 |
| Train | 66.64264925 | 0.038548736 |
| Train | 68.90708418 | 0.074319193 |
| Train | 83.96237889 | 0.890353488 |
| Train | 66.27347264 | 0.034565435 |
| Train | 46.58088765 | 8.5389E-05 |
| Train | 38.48241602 | 7.12779E-06 |
| Train | 48.09303751 | 0.000135755 |
| Train | 50.40111295 | 0.000275462 |
| Train | 55.05276166 | 0.001145905 |
| Train | 49.4816459 | 0.0002078 |
| Train | 39.95294641 | 1.11888E-05 |
| Train | 70.68953385 | 0.121789273 |
| Train | 52.38560765 | 0.000506103 |
| Train | 56.50428699 | 0.00178719 |
| Train | 74.09979609 | 0.282949015 |
| Train | 59.23133763 | 0.004114537 |
| Train | 73.23687085 | 0.232457691 |
| Train | 89.15294445 | 0.975540635 |
| Train | 46.12218648 | 7.41859E-05 |
| Train | 56.28610239 | 0.001671726 |
| Train | 55.92984108 | 0.001498983 |
| Train | 48.400411 | 0.00014917 |
| Train | 66.49495886 | 0.036904903 |
| Train | 49.28603569 | 0.000195705 |
| Train | 51.49928094 | 0.000385708 |
| Train | 65.11436209 | 0.024479126 |
| Train | 67.27830018 | 0.046459266 |
| Train | 70.51556749 | 0.116197818 |
| Train | 51.90299251 | 0.000436515 |
| Train | 54.26672191 | 0.000900695 |
| Train | 47.28626406 | 0.000106006 |
| Train | 61.09702121 | 0.007267727 |
| Train | 79.62143147 | 0.682061084 |
| Train | 55.47640439 | 0.001304658 |
| Train | 45.74255745 | 6.60342E-05 |
| Train | 61.97635754 | 0.009495653 |
| Train | 61.1500409 | 0.007385969 |
| Train | 53.05903444 | 0.000622114 |
| Train | 56.62905599 | 0.001856761 |
| Train | 50.57608745 | 0.000290641 |
| Train | 54.88871998 | 0.001089751 |
| Train | 54.57306762 | 0.000989317 |
| Train | 60.14035694 | 0.005430025 |
| Train | 65.08169269 | 0.024241057 |
| Train | 78.24464525 | 0.58445421 |
| Train | 61.53928837 | 0.008314526 |
| Train | 42.56743603 | 2.49433E-05 |
| Train | 62.38595636 | 0.010752761 |
| Train | 68.72797303 | 0.070627978 |
| Train | 57.23051413 | 0.002231976 |
| Train | 81.56834696 | 0.795801489 |
| Train | 64.14520234 | 0.018300957 |
| Train | 54.83706271 | 0.001072644 |
| Train | 47.96131588 | 0.000130381 |
| Train | 43.84557508 | 3.69113E-05 |
| Train | 50.58113364 | 0.000291091 |
| Train | 55.5356745 | 0.001328554 |
| Train | 56.16855063 | 0.001612636 |
| Train | 54.68159304 | 0.001022759 |
| Train | 44.12902032 | 4.02628E-05 |
| Train | 52.39804968 | 0.000508037 |
| Train | 57.86779034 | 0.002712358 |
| Train | 66.47935534 | 0.036735206 |
| Train | 59.34072954 | 0.004254298 |
| Train | 73.08257813 | 0.224123239 |
| Train | 67.17837214 | 0.045120539 |
| Train | 53.24744149 | 0.000659089 |
| Train | 57.75850324 | 0.002623204 |
| Train | 51.02436867 | 0.000333455 |
| Train | 57.33424359 | 0.002303944 |
| Train | 63.95722645 | 0.017293642 |
| Train | 57.40668429 | 0.002355572 |
| Train | 49.22806846 | 0.000192257 |
| Train | 65.71401791 | 0.029276018 |
| Train | 45.14908983 | 5.5048E-05 |
| Train | 48.53009218 | 0.000155221 |
| Train | 61.39321926 | 0.00795323 |
| Train | 60.05141446 | 0.005284705 |
| Train | 46.37164261 | 8.00827E-05 |
| Train | 60.11610249 | 0.005390007 |
| Train | 52.16977429 | 0.000473708 |
| Train | 50.23413031 | 0.000261717 |
| Train | 60.55427716 | 0.006160343 |
| Train | 59.57621769 | 0.004571405 |
| Train | 55.25974908 | 0.001220902 |
| Train | 63.06517381 | 0.013209671 |
| Train | 44.30883749 | 4.25451E-05 |
| Train | 63.10440412 | 0.0133674 |
| Train | 36.61350095 | 4.01856E-06 |
| Train | 43.93771348 | 3.79689E-05 |
| Train | 54.493326 | 0.000965443 |
| Train | 55.71274869 | 0.001402582 |
| Train | 52.10689079 | 0.000464665 |
| Train | 39.25169706 | 9.02402E-06 |
| Train | 60.29489217 | 0.005692028 |
| Train | 48.47141272 | 0.000152453 |
| Train | 97.31681794 | 0.997952992 |
| Train | 72.35785392 | 0.187852551 |
| Train | 52.25484506 | 0.000486222 |
| Train | 61.80699318 | 0.009019431 |
| Train | 60.52742055 | 0.00611013 |
| Train | 50.44101426 | 0.000278853 |
| Train | 54.11175652 | 0.000858932 |
| Train | 52.74395474 | 0.000564853 |
| Train | 57.65703405 | 0.002543046 |
| Train | 54.82316898 | 0.001068089 |
| Train | 53.30566956 | 0.000670955 |
| Train | 72.5499685 | 0.197005631 |
| Train | 57.3496752 | 0.002314847 |
| Train | 70.88746192 | 0.128431111 |
| Train | 65.09616891 | 0.02434627 |
| Train | 68.63843306 | 0.068846894 |
| Train | 60.63806494 | 0.006319654 |
| Train | 52.4268591 | 0.000512543 |
| Train | 53.16700653 | 0.000643042 |
| Train | 42.99794085 | 2.84631E-05 |
| Train | 54.07351342 | 0.000848927 |
| Train | 61.63465935 | 0.008559156 |
| Train | 76.65328534 | 0.463344668 |
| Train | 53.01988752 | 0.000614695 |
| Train | 56.0478838 | 0.001554149 |
| Train | 68.76806054 | 0.071439145 |
| Train | 48.99932514 | 0.000179237 |
| Train | 44.31137609 | 4.25782E-05 |
| Train | 62.6765967 | 0.011743289 |
| Train | 70.65014804 | 0.120503426 |
| Train | 50.74210735 | 0.000305816 |
| Train | 62.623168 | 0.01155467 |
| Train | 48.99589393 | 0.000179048 |
| Train | 80.36192879 | 0.72915196 |
| Train | 56.23806772 | 0.001647324 |
| Train | 52.2710414 | 0.000488641 |
| Train | 48.12052544 | 0.000136904 |
| Train | 51.51521438 | 0.000387596 |
| Train | 73.19707744 | 0.230287636 |
| Train | 51.64095835 | 0.000402827 |
| Train | 71.43044144 | 0.148248611 |
| Train | 77.50056506 | 0.528200732 |
| Train | 54.23105311 | 0.000890906 |
| Train | 48.85969511 | 0.000171726 |
| Train | 54.90418962 | 0.001094927 |
| Train | 57.81830944 | 0.002671624 |
| Train | 76.88806466 | 0.481285524 |
| Train | 43.23474259 | 3.06067E-05 |
| Train | 48.79647528 | 0.000168429 |
| Train | 60.18470898 | 0.00550397 |
| Train | 57.35363719 | 0.002317654 |
| Train | 51.33309152 | 0.000366552 |
| Train | 44.84792355 | 5.01923E-05 |
| Train | 54.77302733 | 0.001051809 |
| Train | 49.21896634 | 0.000191722 |
| Train | 43.07125431 | 2.91102E-05 |
| Train | 45.22009715 | 5.62596E-05 |
| Train | 54.02877992 | 0.000837372 |
| Train | 55.17293789 | 0.001188869 |
| Train | 50.87935076 | 0.000318956 |
| Train | 44.04535188 | 3.9243E-05 |
| Train | 53.49174749 | 0.000710324 |
| Train | 71.71290292 | 0.159521721 |
| Train | 59.99064893 | 0.005187652 |
| Train | 50.91956856 | 0.000322913 |
| Train | 73.60652241 | 0.253291005 |
| Train | 72.38078669 | 0.188927739 |
| Train | 68.27891373 | 0.062106789 |
| Train | 57.37900424 | 0.00233571 |
| Train | 57.48388934 | 0.002411868 |
| Train | 68.05167366 | 0.058169672 |
| Train | 48.25842166 | 0.000142816 |
| Train | 56.76592987 | 0.001936195 |
| Train | 64.71631411 | 0.021727558 |
| Train | 59.17834464 | 0.004048484 |
| Train | 50.9144761 | 0.000322409 |
| Train | 80.66808927 | 0.747288817 |
| Train | 51.41546453 | 0.000375925 |
| Train | 57.62229744 | 0.00251617 |
| Train | 125.8469966 | 0.999999674 |
| Train | 57.32029673 | 0.002294135 |
| Train | 78.31773214 | 0.589886671 |
| Train | 42.69471014 | 2.59359E-05 |
| Train | 51.48576246 | 0.000384113 |
| Train | 76.1775977 | 0.427331172 |
| Train | 46.69029826 | 8.83021E-05 |
| Train | 81.86934374 | 0.810391163 |
| Train | 48.12174864 | 0.000136955 |
| Train | 48.62756307 | 0.000159929 |
| Train | 58.59347499 | 0.003386051 |
| Train | 75.13899606 | 0.35178035 |
| Train | 46.74311592 | 8.97437E-05 |
| Train | 49.01226262 | 0.000179949 |
| Train | 55.37283768 | 0.001263928 |
| Train | 74.73243506 | 0.323903596 |
| Train | 33.55094954 | 1.57119E-06 |
| Train | 53.34679795 | 0.000679464 |
| Train | 73.08086913 | 0.224032157 |
| Train | 50.56363514 | 0.000289534 |
| Train | 50.96026435 | 0.000326966 |
| Train | 59.17287693 | 0.004041731 |
| Train | 42.88475638 | 2.74922E-05 |
| Train | 56.71651503 | 0.001907134 |
| Train | 49.91416121 | 0.000237264 |
| Train | 55.01485762 | 0.001132678 |
| Train | 49.82650837 | 0.000230973 |
| Train | 58.71344449 | 0.00351249 |
| Train | 57.05271711 | 0.002113798 |
| Train | 63.33368106 | 0.01432707 |
| Train | 61.07009588 | 0.007208399 |
| Train | 62.14638839 | 0.009998785 |
| Train | 76.22782382 | 0.43110426 |
| Train | 61.77471518 | 0.008931395 |
| Train | 54.90448673 | 0.001095027 |
| Train | 54.93700287 | 0.001105987 |
| Train | 77.70777643 | 0.544001315 |
| Train | 68.18983817 | 0.060534682 |
| Train | 68.80278933 | 0.072148804 |
| Train | 62.0516677 | 0.009715332 |
| Train | 48.45459793 | 0.000151669 |
| Train | 67.11154027 | 0.044245788 |
| Train | 56.58318088 | 0.001830873 |
| Train | 56.93985304 | 0.002042041 |
| Train | 50.19861909 | 0.000258883 |
| Train | 49.98468939 | 0.00024245 |
| Train | 47.41131786 | 0.000110149 |
| Train | 62.56956553 | 0.01136844 |
| Train | 39.52966259 | 9.8269E-06 |
| Train | 49.07764549 | 0.000183593 |
| Train | 53.55145876 | 0.00072344 |
| Train | 48.65883142 | 0.00016147 |
| Train | 62.03596071 | 0.009669104 |
| Train | 62.83231718 | 0.012310559 |
| Train | 51.56681552 | 0.000393776 |
| Train | 73.48668699 | 0.246404264 |
| Train | 47.75169427 | 0.000122265 |
| Train | 50.51167527 | 0.000284959 |
| Train | 43.815552 | 3.6573E-05 |
| Train | 43.88571333 | 3.73683E-05 |
| Train | 74.43418309 | 0.304206865 |
| Train | 39.31184625 | 9.192E-06 |
| Train | 73.15920486 | 0.228235618 |
| Train | 79.94343184 | 0.703077818 |
| Train | 61.15665668 | 0.007400857 |
| Train | 53.28197785 | 0.000666101 |
| Train | 58.71105175 | 0.003509923 |
| Train | 56.96827197 | 0.002059877 |
| Train | 83.59416025 | 0.878835363 |
| Train | 96.41572479 | 0.997303283 |
| Train | 63.3480922 | 0.014389607 |
| Train | 67.73536455 | 0.053078047 |
| Train | 58.60678583 | 0.003399854 |
| Train | 87.25285621 | 0.957030321 |
| Train | 56.65087992 | 0.001869205 |
| Train | 51.09037904 | 0.000340271 |
| Train | 59.53367593 | 0.004512426 |
| Train | 55.03325096 | 0.001139078 |
| Train | 81.74400613 | 0.804415057 |
| Train | 60.59500435 | 0.006237276 |
| Train | 64.82326085 | 0.022435655 |
| Train | 60.48776988 | 0.006036731 |
| Train | 63.12207489 | 0.013439047 |
| Train | 66.62494457 | 0.038348032 |
| Train | 42.15107479 | 2.19537E-05 |
| Train | 59.13484625 | 0.003995059 |
| Train | 54.83919429 | 0.001073345 |
| Train | 60.83036848 | 0.006700945 |
| Train | 51.1303735 | 0.000344468 |
| Train | 51.25347935 | 0.000357715 |
| Train | 67.25042302 | 0.04608204 |
| Train | 44.33492704 | 4.28868E-05 |
| Train | 54.81178211 | 0.00106437 |
| Train | 55.58975886 | 0.001350741 |
| Train | 61.61425584 | 0.008506226 |
| Train | 73.5643829 | 0.250854874 |
| Train | 84.92493296 | 0.916024 |
| Train | 62.7171593 | 0.011888517 |
| Train | 50.99968137 | 0.000330941 |
| Train | 43.47597898 | 3.29565E-05 |
| Train | 51.68672925 | 0.000408518 |
| Train | 53.10155256 | 0.000630273 |
| Train | 42.24626834 | 2.26039E-05 |
| Train | 51.37842991 | 0.000371681 |
| Train | 48.35484034 | 0.0001471 |
| Train | 48.67409344 | 0.000162227 |
| Train | 57.90164345 | 0.002740584 |
| Train | 43.49492953 | 3.31486E-05 |
| Train | 60.25982343 | 0.005631489 |
| Train | 59.43050809 | 0.004372522 |
| Train | 69.49093786 | 0.087613508 |
| Train | 63.35399138 | 0.014415279 |
| Train | 73.50225087 | 0.247291483 |
| Train | 89.34013697 | 0.976873519 |
| Train | 61.21569964 | 0.00753505 |
| Train | 69.08385794 | 0.078135427 |
| Train | 55.73947081 | 0.001414105 |
| Train | 72.65212713 | 0.20200829 |
| Train | 61.08284163 | 0.007236422 |
| Train | 49.04926481 | 0.000182002 |
| Train | 56.87200745 | 0.002000082 |
| Train | 64.27079284 | 0.019005832 |
| Train | 50.08196548 | 0.000249789 |
| Train | 45.28925578 | 5.74654E-05 |
| Train | 55.14987029 | 0.001180499 |
| Train | 69.05797256 | 0.077565611 |
| Train | 87.25604281 | 0.957070466 |
| Train | 43.23453395 | 3.06047E-05 |
| Train | 48.6532143 | 0.000161192 |
| Train | 62.65239152 | 0.011657466 |
| Train | 72.07888904 | 0.175149019 |
| Train | 45.27900755 | 5.72851E-05 |
| Train | 40.12264797 | 1.17865E-05 |
| Train | 46.27411991 | 7.77236E-05 |
| Train | 47.82949175 | 0.000125217 |
| Train | 49.87779417 | 0.000234633 |
| Train | 44.3192276 | 4.26809E-05 |
| Train | 45.11040055 | 5.43988E-05 |
| Train | 67.45780884 | 0.048959552 |
| Train | 62.622774 | 0.011553283 |
| Train | 59.69284315 | 0.004737055 |
| Train | 54.0707265 | 0.000848203 |
| Train | 53.3986192 | 0.00069034 |
| Train | 43.63601312 | 3.4614E-05 |
| Train | 64.29614115 | 0.019151294 |
| Train | 94.19694881 | 0.994689051 |
| Train | 59.59414339 | 0.004596486 |
| Train | 51.08947836 | 0.000340177 |
| Train | 40.55041627 | 1.34385E-05 |
| Train | 54.30591484 | 0.000911575 |
| Train | 52.69264887 | 0.000556041 |
| Train | 53.40372442 | 0.000691421 |
| Train | 53.98647252 | 0.000826587 |
| Train | 68.26421662 | 0.061844826 |
| Train | 63.32211634 | 0.014277068 |
| Train | 58.7598451 | 0.003562644 |
| Train | 49.0712314 | 0.000183232 |
| Train | 76.34791941 | 0.440157854 |
| Train | 81.94533865 | 0.813945969 |
| Train | 43.6879476 | 3.51697E-05 |
| Train | 70.69694552 | 0.12203256 |
| Train | 50.12756595 | 0.000253305 |
| Train | 52.14230845 | 0.000469737 |
| Train | 53.37069099 | 0.000684457 |
| Train | 52.57592367 | 0.000536501 |
| Train | 58.06637962 | 0.002882169 |
| Train | 51.29283369 | 0.000362056 |
| Train | 60.21719227 | 0.005558759 |
| Train | 64.58562798 | 0.020891903 |
| Train | 75.12524921 | 0.350819709 |
| Train | 50.82749009 | 0.000313926 |
| Train | 63.44187831 | 0.014803222 |
| Train | 86.7342367 | 0.949993982 |
| Train | 44.61707256 | 4.67623E-05 |
| Train | 63.84791428 | 0.01673311 |
| Train | 78.29065768 | 0.587876729 |
| Train | 56.0279608 | 0.001544697 |
| Train | 50.02283414 | 0.000245301 |
| Train | 45.37179973 | 5.89384E-05 |
| Train | 62.16434289 | 0.010053431 |
| Train | 65.15840182 | 0.024803693 |
| Train | 53.29822729 | 0.000669426 |
| Train | 71.25316801 | 0.141515065 |
| Train | 51.40347617 | 0.000374546 |
| Train | 101.5161581 | 0.999434369 |
| Train | 81.46370534 | 0.79053779 |
| Train | 67.74466657 | 0.053221595 |
| Train | 62.53544835 | 0.011251461 |
| Train | 49.20414742 | 0.000190853 |
| Train | 73.18254029 | 0.229498504 |
| Train | 65.53416542 | 0.027748763 |
| Train | 53.96520224 | 0.000821218 |
| Train | 74.31201368 | 0.296336258 |
| Train | 44.27054808 | 4.20485E-05 |
| Train | 65.79343493 | 0.029976065 |
| Train | 54.99835932 | 0.001126969 |
| Train | 50.5135636 | 0.000285124 |
| Train | 53.98462681 | 0.00082612 |
| Train | 49.71699593 | 0.000223347 |
| Train | 34.62998566 | 2.18738E-06 |
| Train | 61.97710073 | 0.009497798 |
| Train | 52.64530295 | 0.000548031 |
| Train | 64.9278622 | 0.023149989 |
| Train | 44.39916805 | 4.374E-05 |
| Train | 48.08249224 | 0.000135316 |
| Train | 70.26235289 | 0.108458534 |
| Train | 54.32938748 | 0.000918153 |
| Train | 72.10891812 | 0.176483238 |
| Train | 45.63027468 | 6.37995E-05 |
| Train | 45.68375546 | 6.48543E-05 |
| Train | 63.70043506 | 0.016005098 |
| Train | 52.38264751 | 0.000505645 |
| Train | 82.91333777 | 0.854790786 |
| Train | 46.56011982 | 8.4847E-05 |
| Train | 51.62915934 | 0.000401373 |
| Train | 83.11649363 | 0.862353569 |
| Train | 56.10009657 | 0.001579192 |
| Train | 59.37960096 | 0.00430509 |
| Train | 77.82136865 | 0.552627775 |
| Train | 77.52886817 | 0.530362934 |
| Train | 43.81317949 | 3.65464E-05 |
| Train | 50.2757927 | 0.000265081 |
| Train | 64.45794217 | 0.02010585 |
| Train | 60.74830871 | 0.006535522 |
| Train | 54.17691862 | 0.000876252 |
| Train | 55.45410519 | 0.001295779 |
| Train | 44.05773395 | 3.93923E-05 |
| Train | 46.37574595 | 8.01836E-05 |
| Train | 48.36052617 | 0.000147357 |
| Train | 63.3833518 | 0.014543755 |
| Train | 51.5637008 | 0.0003934 |
| Train | 68.86335742 | 0.07340206 |
| Train | 63.41684219 | 0.01469167 |
| Train | 56.69188648 | 0.001892813 |
| Train | 78.91455485 | 0.633324297 |
| Train | 54.84923916 | 0.001076652 |
| Train | 49.58531828 | 0.000214511 |
| Train | 56.85174646 | 0.001987719 |
| Train | 53.85940893 | 0.000795026 |
| Train | 48.39803079 | 0.000149061 |
| Train | 47.69193856 | 0.000120046 |
| Train | 55.74233043 | 0.001415344 |
| Train | 49.90337 | 0.00023648 |
| Train | 60.68666605 | 0.006413932 |
| Train | 56.31493707 | 0.001686548 |
| Train | 61.4643254 | 0.008127119 |
| Train | 70.27944361 | 0.108966343 |
| Train | 61.12501554 | 0.007329923 |
| Train | 80.15577725 | 0.716488671 |
| Train | 58.07651932 | 0.002891118 |
| Train | 58.28867346 | 0.003084852 |
| Train | 69.66274145 | 0.091917205 |
| Train | 45.83476369 | 6.79278E-05 |
| Train | 46.89300806 | 9.39645E-05 |
| Train | 74.00471503 | 0.277071301 |
| Train | 58.93178 | 0.003754788 |
| Train | 44.27934077 | 4.2162E-05 |
| Train | 67.90192675 | 0.055704457 |
| Train | 61.31103293 | 0.007756836 |
| Train | 58.55841122 | 0.003349963 |
| Train | 65.09302045 | 0.024323346 |
| Train | 49.16961252 | 0.000188843 |
| Train | 66.30136208 | 0.034851971 |
| Train | 54.03068871 | 0.000837861 |
| Train | 63.40850393 | 0.014654711 |
| Train | 62.37381945 | 0.010713246 |
| Train | 61.42894529 | 0.008040133 |
| Train | 66.72258438 | 0.039467525 |
| Train | 52.17433426 | 0.00047437 |
| Train | 77.0050084 | 0.490242878 |
| Train | 66.76468542 | 0.03995985 |
| Train | 42.80717606 | 2.68459E-05 |
| Train | 65.69423087 | 0.029104083 |
| Train | 50.12789692 | 0.000253331 |
| Train | 42.78732151 | 2.6683E-05 |
| Train | 50.53798229 | 0.000287266 |
| Train | 73.00803438 | 0.22017354 |
| Train | 53.48155573 | 0.000708109 |
| Train | 49.08174697 | 0.000183824 |
| Train | 45.77844829 | 6.67649E-05 |
| Train | 63.13994794 | 0.013511912 |
| Train | 45.83215179 | 6.78734E-05 |
| Train | 60.89217349 | 0.006828274 |
| Train | 64.32096302 | 0.019294804 |
| Train | 54.30507667 | 0.00091134 |
| Train | 47.64078949 | 0.000118178 |
| Train | 49.91773168 | 0.000237524 |
| Train | 47.55399413 | 0.000115074 |
| Train | 56.88905322 | 0.002010543 |
| Train | 52.66112687 | 0.000550695 |
| Train | 70.1017974 | 0.103788925 |
| Train | 47.0608551 | 9.89268E-05 |
| Train | 46.01803476 | 7.18542E-05 |
| Train | 56.64885367 | 0.001868046 |
| Train | 66.10347333 | 0.032867474 |
| Train | 107.6095417 | 0.999912647 |
| Train | 55.51606673 | 0.001320601 |
| Train | 44.35093703 | 4.30979E-05 |
| Train | 38.40871993 | 6.96852E-06 |
| Train | 85.48224052 | 0.928269351 |
| Train | 44.83411715 | 4.99802E-05 |
| Train | 55.57701126 | 0.001345478 |
| Train | 41.89685699 | 2.03074E-05 |
| Train | 76.30814544 | 0.437154679 |
| Train | 48.5672797 | 0.000157 |
| Train | 45.42010462 | 5.98178E-05 |
| Train | 41.68684946 | 1.90409E-05 |
| Train | 58.17322373 | 0.002977874 |
| Train | 50.21628604 | 0.000260289 |
| Train | 67.4689842 | 0.049119372 |
| Train | 42.10422213 | 2.16405E-05 |
| Train | 66.14138655 | 0.033239024 |
| Train | 53.92092233 | 0.000810152 |
| Train | 57.4080734 | 0.002356574 |
| Train | 54.1200167 | 0.000861109 |
| Train | 59.15203804 | 0.004016089 |
| Train | 84.46056649 | 0.904401839 |
| Train | 55.78831103 | 0.001435412 |
| Train | 57.88190742 | 0.002724093 |
| Train | 55.04749315 | 0.001144058 |
| Train | 89.06255202 | 0.974870465 |
| Train | 42.93024875 | 2.78784E-05 |
| Train | 55.66733306 | 0.001383211 |
| Train | 79.13743305 | 0.64904583 |
| Train | 51.61172758 | 0.000399234 |
| Train | 49.58484803 | 0.00021448 |
| Train | 47.95826943 | 0.00013026 |
| Train | 52.79629397 | 0.000573986 |
| Train | 55.43789313 | 0.001289361 |
| Train | 58.01829159 | 0.002840102 |
| Train | 53.55503597 | 0.000724233 |
| Train | 56.23850035 | 0.001647542 |
| Train | 57.63216441 | 0.002523776 |
| Train | 48.47590716 | 0.000152663 |
| Train | 61.28100932 | 0.007686297 |
| Train | 56.18980018 | 0.001623161 |
| Train | 83.44686711 | 0.873943109 |
| Train | 62.83981817 | 0.012338557 |
| Train | 45.85099645 | 6.82667E-05 |
| Train | 62.69227123 | 0.011799199 |
| Train | 47.12984255 | 0.000101042 |
| Train | 61.38823275 | 0.007941174 |
| Train | 44.5377322 | 4.56384E-05 |
| Train | 57.21729091 | 0.002222964 |
| Train | 48.59260618 | 0.000158224 |
| Train | 55.38975843 | 0.001270494 |
| Train | 79.41881128 | 0.66843811 |
| Train | 40.74057402 | 1.42453E-05 |
| Train | 47.06854533 | 9.91603E-05 |
| Train | 66.39136106 | 0.03579227 |
| Train | 76.06656744 | 0.419020779 |
| Train | 58.4520953 | 0.003242862 |
| Train | 60.81302221 | 0.006665635 |
| Train | 59.54940667 | 0.004534147 |
| Train | 75.69217745 | 0.391360594 |
| Train | 75.61501001 | 0.385738989 |
| Train | 46.09473281 | 7.3564E-05 |
| Train | 56.68026827 | 0.001886094 |
| Train | 80.99039964 | 0.765493429 |
| Train | 72.35567326 | 0.187750502 |
| Train | 63.93316531 | 0.017168697 |
| Train | 56.05939487 | 0.001559635 |
| Train | 45.29402755 | 5.75495E-05 |
| Train | 72.45855497 | 0.192608955 |
| Train | 49.90593682 | 0.000236666 |
| Train | 64.78909864 | 0.022207039 |
| Train | 49.20404845 | 0.000190847 |
| Train | 46.28573749 | 7.80009E-05 |
| Train | 49.39041599 | 0.000202069 |
| Train | 57.91084087 | 0.002748303 |
| Train | 55.46789052 | 0.001301261 |
| Train | 70.94972203 | 0.130583346 |
| Train | 49.69618508 | 0.000221927 |
| Train | 52.67236625 | 0.000552595 |
| Train | 49.06876245 | 0.000183093 |
| Train | 47.40160324 | 0.000109821 |
| Train | 47.17062074 | 0.000102313 |
| Train | 72.26225426 | 0.183421099 |
| Train | 79.9501925 | 0.703510389 |
| Train | 89.24271034 | 0.976188895 |
| Train | 55.603969 | 0.001356632 |
| Train | 50.93009025 | 0.000323956 |
| Train | 62.858989 | 0.0124104 |
| Train | 59.16679611 | 0.004034232 |
| Train | 58.25346267 | 0.003051825 |
| Train | 46.19694308 | 7.5906E-05 |
| Train | 55.75641359 | 0.001421461 |
| Train | 49.924735 | 0.000238034 |
| Train | 68.2902322 | 0.062309273 |
| Train | 52.60447559 | 0.000541216 |
| Train | 73.77890192 | 0.263417997 |
| Train | 44.73866325 | 4.85386E-05 |
| Train | 57.83631514 | 0.002686376 |
| Train | 70.38138066 | 0.112038524 |
| Train | 61.32413653 | 0.007787823 |
| Train | 72.52849897 | 0.195966218 |
| Train | 52.73940183 | 0.000564065 |
| Train | 48.47463974 | 0.000152604 |
| Train | 56.15005464 | 0.00160353 |
| Train | 48.35548519 | 0.00014713 |
| Train | 55.7235893 | 0.001407245 |
| Train | 44.57249633 | 4.61275E-05 |
| Train | 54.07206757 | 0.000848551 |
| Train | 58.94909581 | 0.003774702 |
| Train | 58.53080437 | 0.003321818 |
| Train | 56.99773525 | 0.002078533 |
| Train | 48.64477813 | 0.000160775 |
| Train | 58.97297189 | 0.003802334 |
| Train | 56.13186131 | 0.001594624 |
| Train | 57.71026034 | 0.002584784 |
| Train | 44.14703053 | 4.04858E-05 |
| Train | 52.94517499 | 0.000600781 |
| Train | 72.85681107 | 0.212315213 |
| Train | 45.56244292 | 6.24863E-05 |
| Train | 76.99907876 | 0.489788503 |
| Train | 50.64700401 | 0.000297029 |
| Train | 56.26354426 | 0.001660221 |
| Train | 78.32515782 | 0.590437425 |
| Train | 51.63096406 | 0.000401595 |
| Train | 58.32423727 | 0.00311857 |
| Train | 40.87447192 | 1.48424E-05 |
| Train | 54.49278356 | 0.000965282 |
| Train | 47.49342044 | 0.000112957 |
| Train | 55.48731689 | 0.001309025 |
| Train | 63.46003823 | 0.014884648 |
| Train | 71.99159436 | 0.171315332 |
| Train | 53.66742244 | 0.000749608 |
| Train | 51.63743851 | 0.000402393 |
| Train | 47.25393321 | 0.00010496 |
| Train | 63.84948795 | 0.016741058 |
| Train | 52.35891033 | 0.000501979 |
| Train | 72.48811014 | 0.19402221 |
| Train | 61.06123853 | 0.007188988 |
| Train | 85.55969083 | 0.929834667 |
| Train | 64.21504058 | 0.018689697 |
| Train | 47.85105 | 0.000126047 |
| Train | 47.44476382 | 0.000111284 |
| Train | 48.5839075 | 0.000157803 |
| Train | 60.42184524 | 0.005916643 |
| Train | 54.4165091 | 0.000942989 |
| Train | 65.97646171 | 0.03165174 |
| Train | 88.84049939 | 0.973147352 |
| Train | 53.08955505 | 0.00062796 |
| Train | 87.21109824 | 0.956500668 |
| Train | 41.23377423 | 1.65711E-05 |
| Train | 52.48106557 | 0.000521129 |
| Train | 54.53652707 | 0.000978304 |
| Train | 52.7011734 | 0.000557495 |
| Train | 39.97625783 | 1.12691E-05 |
| Train | 58.16740795 | 0.002972584 |
| Train | 62.53258276 | 0.011241692 |
| Train | 53.79679662 | 0.000779919 |
| Train | 43.46190528 | 3.28146E-05 |
| Train | 62.63156717 | 0.011584122 |
| Train | 58.10283929 | 0.002914478 |
| Train | 51.46999616 | 0.000382261 |
| Train | 58.44123893 | 0.003232119 |
| Train | 36.76672023 | 4.21187E-06 |
| Train | 58.45064808 | 0.003241428 |
| Train | 71.9985548 | 0.171618604 |
| Train | 74.70968178 | 0.322377676 |
| Train | 56.17090946 | 0.001613801 |
| Train | 73.88826324 | 0.269976027 |
| Train | 56.077259 | 0.001568189 |
| Train | 47.91532156 | 0.000128556 |
| Train | 68.7661555 | 0.071400392 |
| Train | 66.14762147 | 0.033300536 |
| Train | 53.81321661 | 0.000783853 |
| Train | 48.56070186 | 0.000156684 |
| Train | 55.09958798 | 0.001162459 |
| Train | 56.97173925 | 0.002062064 |
| Train | 49.14789086 | 0.000187589 |
| Train | 57.26111622 | 0.002252971 |
| Train | 91.97874316 | 0.989568876 |
| Train | 70.87293023 | 0.127933156 |
| Train | 52.32429858 | 0.000496683 |
| Train | 68.23757667 | 0.061372563 |
| Train | 94.83873976 | 0.995633675 |
| Train | 55.82047887 | 0.00144962 |
| Train | 44.3901678 | 4.36194E-05 |
| Train | 83.36033444 | 0.870990801 |
| Train | 47.77973585 | 0.000123321 |
| Train | 72.13234889 | 0.177529896 |
| Train | 81.00825205 | 0.766474597 |
| Train | 45.61502385 | 6.35019E-05 |
| Train | 56.22449929 | 0.001640495 |
| Train | 46.21921351 | 7.6426E-05 |
| Train | 49.09521187 | 0.000184584 |
| Train | 52.21130049 | 0.000479776 |
| Train | 54.89965823 | 0.001093409 |
| Train | 65.62476262 | 0.028508164 |
| Train | 58.67925599 | 0.003475987 |
| Train | 59.75986389 | 0.00483494 |
| Train | 57.07891881 | 0.002130814 |
| Train | 45.01302172 | 5.27985E-05 |
| Train | 40.62718384 | 1.37586E-05 |
| Train | 66.04867678 | 0.032337547 |
| Train | 54.26637165 | 0.000900598 |
| Train | 48.37013149 | 0.000147792 |
| Train | 47.29046418 | 0.000106142 |
| Train | 59.08664219 | 0.003936673 |
| Train | 51.52161387 | 0.000388357 |
| Train | 57.97278063 | 0.002800852 |
| Train | 72.80462854 | 0.209651524 |
| Train | 51.22678352 | 0.0003548 |
| Train | 77.03991841 | 0.492918274 |
| Train | 72.54437381 | 0.196734366 |
| Train | 59.59289916 | 0.00459474 |
| Train | 53.22537455 | 0.000654647 |
| Train | 46.45807529 | 8.22334E-05 |
| Train | 78.92656342 | 0.634179177 |
| Train | 45.5974385 | 6.31604E-05 |
| Train | 74.01119305 | 0.277469409 |
| Train | 45.26498642 | 5.70393E-05 |
| Train | 51.42896483 | 0.000377484 |
| Train | 54.22875317 | 0.000890278 |
| Train | 51.79669659 | 0.000422522 |
| Train | 72.54320644 | 0.196677841 |
| Train | 51.84223526 | 0.000428461 |
| Train | 44.34363143 | 4.30014E-05 |
| Train | 48.12209622 | 0.000136969 |
| Train | 53.90199426 | 0.000805467 |
| Train | 69.69339146 | 0.092704675 |
| Train | 67.89698537 | 0.055624801 |
| Train | 58.45126431 | 0.003242039 |
| Train | 37.96491305 | 6.0819E-06 |
| Train | 46.27733764 | 7.78003E-05 |
| Train | 52.64187872 | 0.000547456 |
| Train | 49.59616763 | 0.000215225 |
| Train | 42.84206445 | 2.71347E-05 |
| Train | 46.04959483 | 7.25529E-05 |
| Train | 77.31971218 | 0.514362636 |
| Train | 64.4606172 | 0.020122018 |
| Train | 53.96990846 | 0.000822403 |
| Train | 36.90314798 | 4.39181E-06 |
| Train | 61.97349307 | 0.009487397 |
| Train | 60.89640136 | 0.006837072 |
| Train | 58.19092807 | 0.002994035 |
| Train | 46.88297042 | 9.36757E-05 |
| Train | 61.13903163 | 0.007361261 |
| Train | 47.59969141 | 0.000116698 |
| Train | 51.77067539 | 0.000419166 |
| Train | 75.59906555 | 0.384581217 |
| Train | 42.1802463 | 2.21509E-05 |
| Train | 67.91550248 | 0.055923835 |
| Train | 54.49471057 | 0.000965852 |
| Train | 54.91162057 | 0.001097423 |
| Train | 52.74086508 | 0.000564318 |
| Train | 49.5685478 | 0.000213411 |
| Train | 56.81605515 | 0.001966126 |
| Train | 55.92384289 | 0.001496232 |
| Train | 47.00082433 | 9.71226E-05 |
| Train | 55.32359295 | 0.001245009 |
| Train | 61.09735287 | 0.00726846 |
| Train | 45.72442458 | 6.56681E-05 |
| Train | 52.15003606 | 0.000470851 |
| Train | 64.20220051 | 0.018617625 |
| Train | 45.16933029 | 5.53907E-05 |
| Train | 42.84858989 | 2.7189E-05 |
| Train | 49.71211254 | 0.000223013 |
| Train | 55.40534559 | 0.001276573 |
| Train | 56.98338333 | 0.002069425 |
| Train | 52.49433316 | 0.000523252 |
| Train | 49.63528243 | 0.000217822 |
| Train | 73.88164939 | 0.269576517 |
| Train | 50.04998584 | 0.000247352 |
| Train | 50.95811293 | 0.000326751 |
| Train | 60.4241111 | 0.00592073 |
| Train | 71.99724718 | 0.171561531 |
| Train | 48.42171396 | 0.000150148 |
| Train | 60.94722462 | 0.006943712 |
| Train | 62.85773464 | 0.012405688 |
| Train | 57.65862132 | 0.002544281 |
| Train | 77.79570872 | 0.550681555 |
| Train | 56.79411059 | 0.001952966 |
| Train | 67.72256039 | 0.052881055 |
| Train | 53.66322841 | 0.000748645 |
| Train | 68.66357229 | 0.069342707 |
| Train | 50.95280813 | 0.00032622 |
| Train | 50.4641239 | 0.000280835 |
| Train | 50.49173556 | 0.000283222 |
| Train | 54.02524883 | 0.000836466 |
| Train | 51.88911493 | 0.000434662 |
| Train | 59.84474452 | 0.0049618 |
| Train | 45.87362755 | 6.87421E-05 |
| Train | 46.20517442 | 7.60978E-05 |
| Train | 62.42468373 | 0.010879817 |
| Train | 68.232194 | 0.061277529 |
| Train | 81.63968304 | 0.799333151 |
| Train | 51.43101651 | 0.000377721 |
| Train | 49.86844474 | 0.000233962 |
| Train | 82.36538662 | 0.832668571 |
| Train | 44.5642663 | 4.60112E-05 |
| Train | 50.41626125 | 0.000276745 |
| Train | 50.84152593 | 0.000315279 |
| Train | 65.6684241 | 0.028881313 |
| Train | 70.29943546 | 0.109562954 |
| Train | 67.07412677 | 0.043763166 |
| Train | 60.65574158 | 0.006353786 |
| Train | 46.8050507 | 9.14643E-05 |
| Train | 55.10300562 | 0.001163676 |
| Train | 60.29227891 | 0.005687494 |
| Train | 57.89466128 | 0.002734738 |
| Train | 46.19965077 | 7.5969E-05 |
| Train | 67.01660371 | 0.043030944 |
| Train | 49.85812445 | 0.000233223 |
| Train | 61.36879613 | 0.007894358 |
| Train | 69.19035722 | 0.080520359 |
| Train | 61.11190255 | 0.007300723 |
| Train | 59.30753377 | 0.004211392 |
| Train | 45.68749289 | 6.49287E-05 |
| Train | 44.8441106 | 5.01336E-05 |
| Train | 44.98214923 | 5.23011E-05 |
| Train | 59.78622509 | 0.004873988 |
| Train | 65.44354255 | 0.027008814 |
| Train | 55.38166172 | 0.001267348 |
| Train | 61.55626358 | 0.008357553 |
| Train | 68.40906228 | 0.064472501 |
| Train | 51.82979753 | 0.000426831 |
| Train | 37.39196654 | 5.10199E-06 |
| Train | 59.82402589 | 0.004930531 |
| Train | 69.43604073 | 0.086277171 |
| Train | 45.41103935 | 5.96518E-05 |
| Train | 57.43310309 | 0.002374687 |
| Train | 59.50829016 | 0.004477591 |
| Train | 68.42689913 | 0.064803144 |
| Train | 44.68618262 | 4.77638E-05 |
| Train | 54.47967769 | 0.000961415 |
| Train | 62.91943215 | 0.012639628 |
| Train | 48.29843715 | 0.000144579 |
| Train | 80.29487383 | 0.725072185 |
| Train | 59.53568057 | 0.004515188 |
| Train | 71.03511928 | 0.133585123 |
| Train | 57.41749438 | 0.002363375 |
| Train | 72.67485072 | 0.203133815 |
| Train | 74.15505848 | 0.286399676 |
| Train | 69.96378274 | 0.099917908 |
| Train | 56.1169836 | 0.001587377 |
| Train | 55.00577236 | 0.001129531 |
| Train | 66.5571103 | 0.037588281 |
| Train | 39.22122172 | 8.94008E-06 |
| Train | 59.39780812 | 0.004329086 |
| Train | 45.3073623 | 5.77853E-05 |
| Train | 56.50246985 | 0.001786196 |
| Train | 46.75891592 | 9.01796E-05 |
| Train | 49.85671846 | 0.000233122 |
| Train | 67.62965164 | 0.051472216 |
| Train | 47.74872031 | 0.000122154 |
| Train | 35.37425805 | 2.74815E-06 |
| Train | 50.36069096 | 0.00027207 |
| Train | 46.84948425 | 9.27189E-05 |
| Train | 73.79078938 | 0.264125879 |
| Train | 50.75550456 | 0.000307074 |
| Train | 69.07235541 | 0.077881748 |
| Train | 52.71462226 | 0.000559798 |
| Train | 61.82077093 | 0.009057271 |
| Train | 59.53625051 | 0.004515974 |
| Train | 51.77258444 | 0.000419411 |
| Train | 56.69921127 | 0.001897061 |
| Train | 80.94228014 | 0.762834269 |
| Train | 52.85035868 | 0.000583575 |
| Train | 49.582513 | 0.000214326 |
| Train | 68.98260629 | 0.075928156 |
| Train | 99.99629657 | 0.999098867 |
| Train | 50.39212917 | 0.000274705 |
| Train | 54.76216357 | 0.001048315 |
| Train | 62.15981934 | 0.010039639 |
| Train | 55.10119387 | 0.00116303 |
| Train | 60.08899905 | 0.005345635 |
| Train | 54.92407303 | 0.001101616 |
| Train | 42.67583977 | 2.57863E-05 |
| Train | 65.97710774 | 0.031657809 |
| Train | 55.46964335 | 0.001301959 |
| Train | 62.94606777 | 0.012741956 |
| Train | 82.64836449 | 0.844412219 |
| Train | 51.28445255 | 0.000361127 |
| Train | 66.64361346 | 0.038559689 |
| Train | 56.8132288 | 0.001964427 |
| Train | 46.9059437 | 9.43379E-05 |
| Train | 51.0160763 | 0.000332608 |
| Train | 59.23767596 | 0.004122507 |
| Train | 48.99796155 | 0.000179162 |
| Train | 62.75578896 | 0.012028473 |
| Train | 72.57599304 | 0.198271068 |
| Train | 48.54595508 | 0.000155977 |
| Train | 84.70958669 | 0.910802946 |
| Train | 57.82059558 | 0.002673493 |
| Train | 70.27408439 | 0.108806876 |
| Train | 57.70157411 | 0.002577926 |
| Train | 43.22245805 | 3.04916E-05 |
| Train | 57.30780955 | 0.002285387 |
| Train | 47.35930555 | 0.000108406 |
| Train | 70.45483792 | 0.114299078 |
| Train | 52.64008107 | 0.000547155 |
| Train | 43.13523 | 2.96869E-05 |
| Train | 60.4880532 | 0.006037257 |
| Train | 83.02649378 | 0.859044847 |
| Train | 75.39143678 | 0.369627614 |
| Train | 60.40354707 | 0.005883734 |
| Train | 81.20678354 | 0.777193895 |
| Train | 56.15022625 | 0.001603615 |
| Train | 56.39399681 | 0.001727862 |
| Train | 56.57089264 | 0.001823999 |
| Train | 52.03461596 | 0.000454485 |
| Train | 70.42053786 | 0.113238651 |
| Train | 43.592393 | 3.41542E-05 |
| Train | 72.2199637 | 0.181486705 |
| Train | 52.97663873 | 0.000606602 |
| Train | 49.27376769 | 0.00019497 |
| Train | 60.55263122 | 0.006157256 |
| Train | 59.99060874 | 0.005187589 |
| Train | 55.65283605 | 0.001377085 |
| Train | 56.89921203 | 0.002016803 |
| Train | 56.54741063 | 0.001810937 |
| Train | 57.29397163 | 0.002275733 |
| Train | 44.75354618 | 4.87606E-05 |
| Train | 49.41872867 | 0.00020383 |
| Train | 49.61518716 | 0.000216484 |
| Train | 47.5533528 | 0.000115052 |
| Train | 48.60531729 | 0.000158842 |
| Train | 43.96624285 | 3.83026E-05 |
| Train | 54.26176548 | 0.000899328 |
| Train | 60.3845956 | 0.00584984 |
| Train | 55.28481793 | 0.001230312 |
| Train | 51.86599798 | 0.000431593 |
| Train | 49.33971935 | 0.000198952 |
| Train | 70.45166499 | 0.114200605 |
| Train | 61.85330757 | 0.009147257 |
| Train | 52.56968084 | 0.000535476 |
| Train | 54.14895116 | 0.000868776 |
| Train | 73.93437362 | 0.272771751 |
| Train | 58.56717887 | 0.003358951 |
| Train | 64.34371559 | 0.019427262 |
| Train | 50.49721927 | 0.000283699 |
| Train | 66.60810396 | 0.038158064 |
| Train | 61.00892219 | 0.007075391 |
| Train | 50.8125713 | 0.000312493 |
| Train | 60.07691641 | 0.005325971 |
| Train | 64.26072137 | 0.018948337 |
| Train | 38.73236926 | 7.69558E-06 |
| Train | 75.33510798 | 0.365612162 |
| Train | 61.96652711 | 0.009467344 |
| Train | 80.85409087 | 0.757907112 |
| Train | 51.04199451 | 0.000335261 |
| Train | 52.09514235 | 0.000462995 |
| Train | 49.10893566 | 0.000185362 |
| Train | 65.98728762 | 0.031753641 |
| Train | 57.05885479 | 0.002117772 |
| Train | 56.40637091 | 0.00173442 |
| Train | 49.89683335 | 0.000236007 |
| Train | 76.28811758 | 0.435644211 |
| Train | 50.68747099 | 0.000300736 |
| Train | 44.77600862 | 4.90976E-05 |
| Train | 81.36889673 | 0.785683183 |
| Train | 55.85151808 | 0.001463463 |
| Train | 75.57591576 | 0.382902513 |
| Train | 55.75293202 | 0.001419946 |
| Train | 59.48202647 | 0.004441838 |
| Train | 77.51160915 | 0.529044543 |
| Train | 53.8922772 | 0.000803073 |
| Train | 77.45789229 | 0.524938615 |
| Train | 74.94949814 | 0.338646918 |
| Train | 52.07534278 | 0.000460194 |
| Train | 48.43284056 | 0.000150661 |
| Train | 70.50075174 | 0.115732103 |
| Train | 66.94015876 | 0.042075923 |
| Train | 44.63522161 | 4.70232E-05 |
| Train | 46.97247116 | 9.62819E-05 |
| Train | 51.62750509 | 0.000401169 |
| Train | 78.26817707 | 0.586205638 |
| Train | 51.7225396 | 0.000413027 |
| Train | 49.06392347 | 0.000182822 |
| Train | 66.20470961 | 0.03386868 |
| Train | 44.91848425 | 5.129E-05 |
| Train | 71.55265144 | 0.153043091 |
| Train | 43.88027636 | 3.73061E-05 |
| Train | 53.80639698 | 0.000782217 |
| Train | 51.06985245 | 0.000338136 |
| Train | 58.2250908 | 0.003025469 |
| Train | 69.91802437 | 0.098663112 |
| Train | 63.12764847 | 0.013461732 |
| Train | 89.52694603 | 0.978132879 |
| Train | 56.53750484 | 0.001805454 |
| Train | 53.19507571 | 0.000648597 |
| Train | 39.26954812 | 9.07355E-06 |
| Train | 83.63849508 | 0.880275517 |
| Train | 58.39615456 | 0.003187886 |
| Train | 47.380323 | 0.000109107 |
| Train | 58.86974615 | 0.0036843 |
| Train | 45.9558906 | 7.0498E-05 |
| Train | 42.09639235 | 2.15886E-05 |
| Train | 73.81910191 | 0.265816759 |
| Train | 62.96770638 | 0.012825702 |
| Train | 70.37616622 | 0.111879536 |
| Train | 52.42526475 | 0.000512292 |
| Train | 48.43417458 | 0.000150722 |
| Train | 74.49561918 | 0.308208964 |
| Train | 72.25346588 | 0.183017756 |
| Train | 50.12065451 | 0.000252769 |
| Train | 45.00227959 | 5.26249E-05 |
| Train | 66.45971669 | 0.036522722 |
| Train | 49.96919258 | 0.0002413 |
| Train | 57.85860926 | 0.002704754 |
| Train | 53.23534622 | 0.000656651 |
| Train | 45.91838782 | 6.9692E-05 |
| Train | 53.55487029 | 0.000724196 |
| Train | 68.45423329 | 0.065312956 |
| Train | 64.68291572 | 0.021510938 |
| Train | 56.20090338 | 0.001628688 |
| Train | 52.52972932 | 0.000528959 |
| Train | 69.24803476 | 0.08183952 |
| Train | 69.94870502 | 0.099502923 |
| Train | 64.04592418 | 0.017761977 |
| Train | 53.07008162 | 0.000624223 |
| Train | 49.33927703 | 0.000198925 |
| Train | 47.77823841 | 0.000123264 |
| Train | 81.61299333 | 0.798017161 |
| Train | 64.54559625 | 0.020642287 |
| Train | 46.35836599 | 7.97574E-05 |
| Train | 51.49676397 | 0.000385411 |
| Train | 73.67145587 | 0.257075325 |
| Train | 45.9616893 | 7.06235E-05 |
| Train | 44.30690103 | 4.25198E-05 |
| Train | 44.93953058 | 5.16221E-05 |
| Train | 62.34890708 | 0.010632583 |
| Train | 66.35943807 | 0.035455966 |
| Train | 57.45808104 | 0.002392901 |
| Train | 76.64329757 | 0.462583249 |
| Train | 69.53486874 | 0.088696315 |
| Train | 60.96408167 | 0.006979446 |
| Train | 51.82866976 | 0.000426683 |
| Train | 76.00323102 | 0.414300395 |
| Train | 50.72965936 | 0.000304651 |
| Train | 67.8753908 | 0.05527798 |
| Train | 68.23466562 | 0.061321167 |
| Train | 56.22974757 | 0.001643133 |
| Train | 46.67229296 | 8.7816E-05 |
| Train | 51.73924153 | 0.000415147 |
| Train | 46.25224873 | 7.72041E-05 |
| Train | 53.55065864 | 0.000723262 |
| Train | 40.1574523 | 1.19129E-05 |
| Train | 37.83351745 | 5.84172E-06 |
| Train | 62.84250163 | 0.012348591 |
| Train | 57.33501061 | 0.002304485 |
| Train | 50.96978682 | 0.000327922 |
| Train | 63.5945904 | 0.015501897 |
| Train | 41.63561352 | 1.87441E-05 |
| Train | 57.4826998 | 0.00241099 |
| Train | 48.37436914 | 0.000147984 |
| Train | 55.86760249 | 0.001470688 |
| Train | 58.38908282 | 0.003181002 |
| Train | 58.42699529 | 0.003218079 |
| Train | 53.9516895 | 0.000817825 |
| Train | 68.18030386 | 0.060368637 |
| Train | 46.84917995 | 9.27102E-05 |
| Train | 71.8770978 | 0.166388396 |
| Train | 46.86932475 | 9.32846E-05 |
| Train | 54.43327517 | 0.000947845 |
| Train | 69.70711606 | 0.093059278 |
| Train | 75.79027822 | 0.398548862 |
| Train | 58.08916403 | 0.002902318 |
| Train | 90.60522609 | 0.984191974 |
| Train | 64.60931976 | 0.02104103 |
| Train | 62.69094953 | 0.011794477 |
| Train | 43.93818215 | 3.79744E-05 |
| Train | 59.40556306 | 0.004339349 |
| Train | 43.26058865 | 3.08502E-05 |
| Train | 42.16821008 | 2.20693E-05 |
| Train | 86.046378 | 0.938968339 |
| Train | 66.11982216 | 0.033027193 |
| Train | 51.98962793 | 0.000448262 |
| Train | 53.05459682 | 0.000621268 |
| Train | 54.24027931 | 0.000893428 |
| Train | 64.48516838 | 0.020270991 |
| Train | 68.94710978 | 0.075168007 |
| Train | 53.54085313 | 0.000721093 |
| Train | 76.68029564 | 0.465404704 |
| Train | 48.91411841 | 0.000174615 |
| Train | 52.57834566 | 0.0005369 |
| Train | 57.92350327 | 0.002758964 |
| Train | 56.70708563 | 0.001901638 |
| Train | 45.50352196 | 6.13675E-05 |
| Train | 56.59495654 | 0.001837484 |
| Train | 47.11249343 | 0.000100506 |
| Train | 53.82509856 | 0.000786712 |
| Train | 52.38713472 | 0.00050634 |
| Train | 56.13284729 | 0.001595105 |
| Train | 49.15997444 | 0.000188285 |
| Train | 59.51255216 | 0.004483423 |
| Train | 81.24126878 | 0.77901969 |
| Train | 73.88150201 | 0.269567586 |
| Train | 61.13341887 | 0.007348694 |
| Train | 71.62556113 | 0.155963579 |
| Train | 63.78272497 | 0.016407388 |
| Train | 61.1943252 | 0.007486193 |
| Train | 66.7152017 | 0.039381801 |
| Train | 48.98349236 | 0.000178369 |
| Train | 62.87215138 | 0.012459971 |
| Train | 56.60147229 | 0.001841151 |
| Train | 54.21297532 | 0.000885985 |
| Train | 54.5543821 | 0.00098367 |
| Train | 72.84461414 | 0.211690391 |
| Train | 69.86276885 | 0.097166556 |
| Train | 53.65912115 | 0.000747703 |
| Train | 48.47046048 | 0.000152408 |
| Train | 47.67299663 | 0.000119351 |
| Train | 51.47270002 | 0.000382578 |
| Train | 55.12714251 | 0.00117231 |
| Train | 53.62130541 | 0.00073909 |
| Train | 46.03962812 | 7.23315E-05 |
| Train | 60.65637688 | 0.006355014 |
| Train | 61.54782318 | 0.008336132 |
| Train | 47.40803225 | 0.000110038 |
| Train | 66.4462119 | 0.036377265 |
| Train | 52.05862183 | 0.000457842 |
| Train | 44.56696093 | 4.60493E-05 |
| Train | 53.69584983 | 0.000756165 |
| Train | 53.12556858 | 0.000634928 |
| Train | 45.40888359 | 5.96124E-05 |
| Train | 40.16662898 | 1.19465E-05 |
| Train | 51.80604338 | 0.000423735 |
| Train | 61.80305204 | 0.009008634 |
| Train | 50.90301999 | 0.000321279 |
| Train | 38.39193344 | 6.93275E-06 |
| Train | 56.34218609 | 0.001700675 |
| Train | 53.98211156 | 0.000825484 |
| Train | 84.382619 | 0.902315251 |
| Train | 53.53230161 | 0.000719206 |
| Train | 67.89359081 | 0.055570148 |
| Train | 63.60251172 | 0.015539009 |
| Train | 64.26007093 | 0.018944638 |
| Train | 81.0474784 | 0.768620664 |
| Train | 47.73387295 | 0.000121599 |
| Train | 43.74631667 | 3.58048E-05 |
| Train | 65.48399852 | 0.02733675 |
| Train | 82.442054 | 0.835918587 |
| Train | 51.63004516 | 0.000401482 |
| Train | 50.97756992 | 0.000328705 |
| Train | 75.09802519 | 0.348920917 |
| Train | 57.30978377 | 0.002286768 |
| Train | 44.19693062 | 4.111E-05 |
| Train | 48.80054293 | 0.00016864 |
| Train | 51.99458099 | 0.000448943 |
| Train | 49.22423906 | 0.000192032 |
| Train | 53.11753354 | 0.000633367 |
| Train | 52.55333203 | 0.000532799 |
| Train | 70.98517434 | 0.131822516 |
| Train | 49.85094993 | 0.00023271 |
| Train | 54.94120426 | 0.001107412 |
| Train | 48.02064081 | 0.000132775 |
| Train | 59.63388854 | 0.004652585 |
| Train | 48.03233775 | 0.000133252 |
| Train | 77.91090207 | 0.559404948 |
| Train | 40.03857878 | 1.14865E-05 |
| Train | 70.49445002 | 0.115534533 |
| Train | 65.2259362 | 0.02530956 |
| Train | 63.84628556 | 0.016724904 |
| Train | 43.8146998 | 3.65635E-05 |
| Train | 45.9855631 | 7.11424E-05 |
| Train | 52.68955363 | 0.000555513 |
| Train | 71.26692613 | 0.142028384 |
| Train | 63.10238416 | 0.013359232 |
| Train | 60.08344106 | 0.005336579 |
| Train | 57.65034641 | 0.002537849 |
| Train | 47.82332071 | 0.00012498 |
| Train | 55.22155517 | 0.001206704 |
| Train | 52.23859239 | 0.000483806 |
| Train | 60.55484944 | 0.006161418 |
| Train | 53.23964914 | 0.000657517 |
| Train | 63.43795758 | 0.014785697 |
| Train | 48.599322 | 0.00015855 |
| Train | 47.84866177 | 0.000125955 |
| Train | 47.85235489 | 0.000126098 |
| Train | 66.52937422 | 0.037281814 |
| Train | 40.44709537 | 1.30194E-05 |
| Train | 51.91840229 | 0.000438582 |
| Train | 42.02444935 | 2.11176E-05 |
| Train | 50.9693737 | 0.00032788 |
| Train | 40.67473787 | 1.39606E-05 |
| Train | 50.44397551 | 0.000279106 |
| Train | 52.29139224 | 0.000491698 |
| Train | 69.76604589 | 0.094595662 |
| Train | 65.95759063 | 0.031474858 |
| Train | 63.33313101 | 0.014324685 |
| Train | 60.92699243 | 0.006901065 |
| Train | 56.57746501 | 0.001827672 |
| Train | 44.18418724 | 4.09497E-05 |
| Train | 62.11647642 | 0.009908402 |
| Train | 38.76886512 | 7.78218E-06 |
| Train | 64.05753638 | 0.017824209 |
| Train | 69.08106913 | 0.078073856 |
| Train | 53.03955634 | 0.000618411 |
| Train | 43.61342414 | 3.43751E-05 |
| Train | 77.59897737 | 0.535714011 |
| Train | 59.84329709 | 0.00495961 |
| Train | 41.39738307 | 1.74237E-05 |
| Train | 60.03605045 | 0.005259997 |
| Train | 45.33111554 | 5.82077E-05 |
| Train | 53.69963932 | 0.000757044 |
| Train | 50.4222978 | 0.000277257 |
| Train | 52.24073678 | 0.000484124 |
| Train | 47.21606543 | 0.000103748 |
| Train | 63.90547971 | 0.017026028 |
| Train | 66.66730891 | 0.038829961 |
| Train | 58.53762122 | 0.003328746 |
| Train | 61.39741712 | 0.007963392 |
| Train | 53.54298274 | 0.000721563 |
| Train | 65.00727318 | 0.023707103 |
| Train | 46.47399015 | 8.26357E-05 |
| Train | 43.86436818 | 3.71246E-05 |
| Train | 53.58794064 | 0.000731572 |
| Train | 51.45224501 | 0.000380187 |
| Train | 48.21310695 | 0.000140845 |
| Train | 56.28146221 | 0.001669353 |
| Train | 48.10346441 | 0.000136189 |
| Train | 52.23531029 | 0.000483319 |
| Train | 43.75391045 | 3.58882E-05 |
| Train | 70.2101828 | 0.106921343 |
| Train | 70.24253122 | 0.107872208 |
| Train | 45.02476453 | 5.2989E-05 |
| Train | 68.12402256 | 0.059397084 |
| Train | 50.33536069 | 0.000269966 |
| Train | 73.00393824 | 0.219958014 |
| Train | 40.27393381 | 1.23461E-05 |
| Train | 45.03440325 | 5.31458E-05 |
| Train | 94.00441291 | 0.994367873 |
| Train | 58.72407467 | 0.003523917 |
| Train | 53.81897678 | 0.000785238 |
| Train | 76.11346372 | 0.422525507 |
| Train | 38.27590342 | 6.69042E-06 |
| Train | 48.96768759 | 0.000177507 |
| Train | 53.29549876 | 0.000668867 |
| Train | 51.97935621 | 0.000446853 |
| Train | 45.57695131 | 6.27649E-05 |
| Train | 74.1378305 | 0.285321225 |
| Train | 45.21421989 | 5.61583E-05 |
| Train | 73.84393088 | 0.267305215 |
| Train | 50.37070767 | 0.000272907 |
| Train | 57.56395791 | 0.002471669 |
| Train | 46.67271726 | 8.78274E-05 |
| Train | 54.15517899 | 0.000870435 |
| Train | 65.58313221 | 0.028156725 |
| Train | 62.15352533 | 0.010020473 |
| Train | 49.40400603 | 0.000202912 |
| Train | 40.41283918 | 1.28833E-05 |
| Train | 43.65549462 | 3.48214E-05 |
| Train | 54.2173441 | 0.000887172 |
| Train | 83.34942531 | 0.870614449 |
| Train | 56.28286042 | 0.001670068 |
| Train | 53.39390721 | 0.000689344 |
| Train | 80.42858425 | 0.733169516 |
| Train | 54.48702939 | 0.000963582 |
| Train | 65.54663565 | 0.027852109 |
| Train | 53.98079949 | 0.000825152 |
| Train | 49.36551028 | 0.000200532 |
| Train | 56.20154928 | 0.001629009 |
| Train | 61.43785637 | 0.008061954 |
| Train | 46.32061762 | 7.88396E-05 |
| Train | 49.23867039 | 0.000192883 |
| Train | 86.68368321 | 0.949252445 |
| Train | 40.30026996 | 1.24462E-05 |
| Train | 55.26824678 | 0.001224084 |
| Train | 55.91915025 | 0.001494084 |
| Train | 49.26558416 | 0.000194481 |
| Train | 73.77322157 | 0.263080188 |
| Train | 49.90560761 | 0.000236642 |
| Train | 73.03599078 | 0.221648955 |
| Train | 51.8901712 | 0.000434803 |
| Train | 44.69001368 | 4.78199E-05 |
| Train | 93.02695485 | 0.992414448 |
| Train | 69.24973296 | 0.08187866 |
| Train | 42.2099196 | 2.23534E-05 |
| Train | 47.16468916 | 0.000102127 |
| Train | 47.32613968 | 0.00010731 |
| Train | 58.3267381 | 0.003120956 |
| Train | 47.55083051 | 0.000114963 |
| Train | 64.1845879 | 0.018519202 |
| Train | 47.88870205 | 0.000127511 |
| Train | 42.17238716 | 2.20976E-05 |
| Train | 51.84531148 | 0.000428865 |
| Train | 78.79396585 | 0.624695744 |
| Train | 55.2096114 | 0.001202298 |
| Train | 60.67862858 | 0.006398245 |
| Train | 57.60511007 | 0.002502977 |
| Train | 54.13262348 | 0.000864441 |
| Train | 57.99114381 | 0.002816623 |
| Train | 48.88495967 | 0.000173061 |
| Train | 53.50814231 | 0.000713901 |
| Train | 58.18393469 | 0.002987641 |
| Train | 58.92734292 | 0.003749702 |
| Train | 64.47629449 | 0.020217031 |
| Train | 42.33738367 | 2.32444E-05 |
| Train | 73.10859499 | 0.22551359 |
| Train | 51.85908053 | 0.000430679 |
| Train | 84.45701952 | 0.904307728 |
| Train | 59.58309678 | 0.004581013 |
| Train | 48.93217368 | 0.000175584 |
| Train | 58.68883691 | 0.003486178 |
| Train | 50.63932882 | 0.000296331 |
| Train | 62.06042157 | 0.009741188 |
| Train | 57.14985065 | 0.002177566 |
| Train | 57.79098779 | 0.002649394 |
| Train | 58.26360206 | 0.003061299 |
| Train | 48.02195101 | 0.000132828 |
| Train | 57.13313237 | 0.002166455 |
| Train | 49.02705811 | 0.000180767 |
| Train | 43.29182474 | 3.11471E-05 |
| Train | 61.26734179 | 0.007654399 |
| Train | 66.76710658 | 0.039988341 |
| Train | 83.72498445 | 0.883042531 |
| Train | 48.0523436 | 0.000134071 |
| Train | 79.64097164 | 0.683359001 |
| Train | 56.81357342 | 0.001964633 |
| Train | 46.66875982 | 8.77209E-05 |
| Train | 48.5782657 | 0.00015753 |
| Train | 61.4661846 | 0.008131718 |
| Train | 78.78775162 | 0.624248936 |
| Train | 64.9107964 | 0.023031956 |
| Train | 49.09125375 | 0.00018436 |
| Train | 65.86072857 | 0.030581926 |
| Train | 44.22946762 | 4.15222E-05 |
| Train | 41.12130698 | 1.60094E-05 |
| Train | 41.14731001 | 1.61375E-05 |
| Train | 78.95735421 | 0.636366624 |
| Train | 78.93982173 | 0.63512164 |
| Train | 67.18326296 | 0.04518518 |
| Train | 55.59806099 | 0.001354179 |
| Train | 83.7245412 | 0.883028484 |
| Train | 42.86389757 | 2.73169E-05 |
| Train | 54.82880016 | 0.001069933 |
| Train | 73.38431455 | 0.240621798 |
| Train | 79.04084007 | 0.642269684 |
| Train | 44.70411562 | 4.80271E-05 |
| Train | 76.96640865 | 0.48728536 |
| Train | 65.66438001 | 0.02884655 |
| Train | 42.95053152 | 2.80523E-05 |
| Train | 68.84308538 | 0.072980363 |
| Train | 48.63245194 | 0.000160169 |
| Train | 61.56406952 | 0.008377416 |
| Train | 58.27432966 | 0.003071355 |
| Train | 47.85157344 | 0.000126067 |
| Train | 64.00846171 | 0.017562661 |
| Train | 68.27938289 | 0.062115192 |
| Train | 46.84189642 | 9.25034E-05 |
| Train | 62.73056124 | 0.011936886 |
| Train | 48.17535796 | 0.000139225 |
| Train | 41.50254754 | 1.79947E-05 |
| Train | 51.7300365 | 0.000413977 |
| Train | 45.92622291 | 6.98597E-05 |
| Train | 50.0378137 | 0.00024643 |
| Train | 86.59120191 | 0.947868802 |
| Train | 47.16427521 | 0.000102114 |
| Train | 49.46704524 | 0.000206872 |
| Train | 50.72439857 | 0.00030416 |
| Train | 74.68492738 | 0.320721724 |
| Train | 55.37255926 | 0.00126382 |
| Train | 48.45166863 | 0.000151533 |
| Train | 44.62309372 | 4.68487E-05 |
| Train | 66.09402457 | 0.032775488 |
| Train | 54.74568533 | 0.001043037 |
| Train | 52.62039317 | 0.000543863 |
| Train | 54.51282495 | 0.000971227 |
| Train | 66.28645854 | 0.03469857 |
| Train | 51.31264483 | 0.000364262 |
| Train | 54.9287283 | 0.001103188 |
| Train | 59.36921891 | 0.004291465 |
| Train | 79.37551791 | 0.665489258 |
| Train | 39.2524591 | 9.02613E-06 |
| Train | 46.11931439 | 7.41206E-05 |
| Train | 55.16604116 | 0.00118636 |
| Train | 41.42808076 | 1.75884E-05 |
| Train | 92.68303437 | 0.991577885 |
| Train | 55.89312787 | 0.001482227 |
| Train | 61.0747494 | 0.007218616 |
| Train | 53.77140358 | 0.000773875 |
| Train | 44.50422426 | 4.51719E-05 |
| Train | 57.34766627 | 0.002313425 |
| Train | 46.46604999 | 8.24347E-05 |
| Train | 47.5991631 | 0.000116679 |
| Train | 61.77731868 | 0.008938462 |
| Train | 58.9049023 | 0.003724084 |
| Train | 49.33091991 | 0.000198416 |
| Train | 81.27849103 | 0.780978265 |
| Train | 50.03838017 | 0.000246473 |
| Train | 79.38498033 | 0.666134873 |
| Train | 57.08194128 | 0.002132785 |
| Train | 49.66241487 | 0.000219641 |
| Train | 38.46114182 | 7.08144E-06 |
| Train | 69.07683757 | 0.077980492 |
| Train | 68.29758499 | 0.062441121 |
| Train | 57.53372783 | 0.002448919 |
| Train | 46.26221203 | 7.74403E-05 |
| Train | 56.78207674 | 0.001945787 |
| Train | 51.77466975 | 0.000419679 |
| Train | 47.40122275 | 0.000109809 |
| Train | 52.55475627 | 0.000533032 |
| Train | 76.18391204 | 0.427805002 |
| Train | 69.7503387 | 0.094183924 |
| Train | 54.51354671 | 0.000971442 |
| Train | 49.49061299 | 0.000208372 |
| Train | 42.79382305 | 2.67362E-05 |
| Train | 49.72243338 | 0.00022372 |
| Train | 68.29420689 | 0.062380515 |
| Train | 87.83363634 | 0.96378622 |
| Train | 46.92567282 | 9.49103E-05 |
| Train | 44.57702185 | 4.61915E-05 |
| Train | 53.51448522 | 0.00071529 |
| Train | 53.03410087 | 0.000617378 |
| Train | 59.62605668 | 0.004641477 |
| Train | 41.84599622 | 1.99931E-05 |
| Train | 60.88938167 | 0.006822471 |
| Train | 44.73598155 | 4.84987E-05 |
| Train | 64.63328567 | 0.021192937 |
| Train | 69.87421647 | 0.097474921 |
| Train | 81.715983 | 0.803059638 |
| Train | 62.02860818 | 0.009647536 |
| Train | 43.60034673 | 3.42376E-05 |
| Train | 57.91015922 | 0.002747729 |
| Train | 59.03496347 | 0.003875021 |
| Train | 57.2187692 | 0.00222397 |
| Train | 71.21092867 | 0.139948748 |
| Train | 53.76865809 | 0.000773224 |
| Train | 58.99522155 | 0.003828265 |
| Train | 53.09542655 | 0.000629091 |
| Train | 58.83854487 | 0.003649347 |
| Train | 66.35588168 | 0.03541871 |
| Train | 47.47328924 | 0.000112262 |
| Train | 60.11822844 | 0.005393503 |
| Train | 67.53295594 | 0.05004372 |
| Train | 43.37325182 | 3.19346E-05 |
| Train | 55.6740637 | 0.001386065 |
| Train | 58.93249235 | 0.003755605 |
| Train | 61.48127695 | 0.00816913 |
| Train | 53.86013538 | 0.000795203 |
| Train | 79.04400148 | 0.642492353 |
| Train | 68.32537239 | 0.062941825 |
| Train | 47.48813457 | 0.000112774 |
| Train | 56.39990696 | 0.001730991 |
| Train | 54.85056174 | 0.001077088 |
| Train | 59.35153067 | 0.00426835 |
| Train | 62.36988083 | 0.010700453 |
| Train | 80.05947367 | 0.710451933 |
| Train | 54.58095258 | 0.000991709 |
| Train | 53.33621817 | 0.000677265 |
| Train | 78.73640293 | 0.620548424 |
| Train | 66.42935584 | 0.036196517 |
| Train | 61.02261559 | 0.007104951 |
| Train | 50.84724929 | 0.000315833 |
| Train | 38.89859611 | 8.098E-06 |
| Train | 63.63735723 | 0.015703312 |
| Train | 63.74856756 | 0.01623921 |
| Train | 66.19578535 | 0.033779242 |
| Train | 47.60198246 | 0.00011678 |
| Train | 48.18419069 | 0.000139602 |
| Train | 67.91167719 | 0.055861932 |
| Train | 45.1736155 | 5.54635E-05 |
| Train | 61.20122618 | 0.007501933 |
| Train | 56.07344983 | 0.001566361 |
| Train | 58.22907228 | 0.003029154 |
| Train | 68.33327303 | 0.063084843 |
| Train | 57.46384704 | 0.002397126 |
| Train | 74.83411356 | 0.330768554 |
| Train | 45.30358381 | 5.77184E-05 |
| Train | 47.63716148 | 0.000118046 |
| Train | 62.48637131 | 0.011085268 |
| Train | 72.69897074 | 0.204333644 |
| Train | 45.95728702 | 7.05282E-05 |
| Train | 83.38229915 | 0.871745696 |
| Train | 61.25635465 | 0.007628848 |
| Train | 56.83420781 | 0.001977079 |
| Train | 59.42820692 | 0.004369452 |
| Train | 51.84703455 | 0.000429092 |
| Train | 49.4972455 | 0.000208796 |
| Train | 56.44129615 | 0.001753061 |
| Train | 49.77881809 | 0.000227621 |
| Train | 71.38196715 | 0.146381557 |
| Train | 44.10296855 | 3.99425E-05 |
| Train | 50.40643335 | 0.000275912 |
| Train | 59.94651459 | 0.005118277 |
| Train | 57.47666566 | 0.002406544 |
| Train | 51.25798204 | 0.000358209 |
| Train | 70.6375038 | 0.120093094 |
| Train | 46.75357544 | 9.0032E-05 |
| Train | 73.24118675 | 0.232693889 |
| Train | 42.0449665 | 2.12509E-05 |
| Train | 48.58844462 | 0.000158022 |
| Train | 40.70850717 | 1.4106E-05 |
| Train | 44.19568786 | 4.10943E-05 |
| Train | 53.87937077 | 0.000799903 |
| Train | 54.38493512 | 0.000933912 |
| Train | 80.99851595 | 0.765939875 |
| Train | 43.99283422 | 3.86161E-05 |
| Train | 61.30958345 | 0.007753416 |
| Train | 48.22824365 | 0.0001415 |
| Train | 52.16406725 | 0.00047288 |
| Train | 57.54651 | 0.002458512 |
| Train | 89.52379318 | 0.978112181 |
| Train | 66.85879313 | 0.041081721 |
| Train | 49.29737516 | 0.000196386 |
| Train | 52.63571223 | 0.000546422 |
| Train | 56.59385978 | 0.001836867 |
| Train | 62.9016202 | 0.012571646 |
| Train | 51.84701558 | 0.00042909 |
| Train | 60.18947364 | 0.005511971 |
| Train | 73.0361836 | 0.221659156 |
| Train | 47.32573641 | 0.000107296 |
| Train | 50.46908287 | 0.000281262 |
| Train | 55.69005803 | 0.00139287 |
| Train | 62.22243267 | 0.010232266 |
| Train | 47.60841408 | 0.000117011 |
| Train | 41.40953408 | 1.74887E-05 |
| Train | 73.98819598 | 0.276057837 |
| Train | 53.01560058 | 0.000613888 |
| Train | 53.70118133 | 0.000757402 |
| Train | 55.21246845 | 0.00120335 |
| Train | 46.85631679 | 9.29133E-05 |
| Train | 44.05844163 | 3.94008E-05 |
| Train | 43.89884186 | 3.75191E-05 |
| Train | 59.33885914 | 0.004251868 |
| Train | 48.69407225 | 0.000163224 |
| Train | 44.43026061 | 4.4159E-05 |
| Train | 46.9269394 | 9.49471E-05 |
| Train | 54.06660143 | 0.000847131 |
| Train | 67.60393006 | 0.05108852 |
| Train | 58.9714833 | 0.003800605 |
| Train | 54.57160118 | 0.000988873 |
| Train | 68.60814764 | 0.068253942 |
| Train | 50.67344766 | 0.000299446 |
| Train | 48.78180611 | 0.000167674 |
| Train | 56.48260826 | 0.00177537 |
| Train | 53.56290303 | 0.000725981 |
| Train | 43.82526371 | 3.66821E-05 |
| Train | 44.02827877 | 3.90381E-05 |
| Train | 66.50883754 | 0.037056448 |
| Train | 70.68452396 | 0.121625039 |
| Train | 61.21391954 | 0.007530967 |
| Train | 41.17610022 | 1.62806E-05 |
| Train | 50.68191643 | 0.000300225 |
| Train | 46.21391435 | 7.6302E-05 |
| Train | 57.69457713 | 0.002572415 |
| Train | 58.45284788 | 0.003243608 |
| Train | 58.2185754 | 0.003019449 |
| Train | 63.12532534 | 0.013452268 |
| Train | 52.30492517 | 0.000493742 |
| Train | 71.13657333 | 0.137227014 |
| Train | 68.1788996 | 0.060344199 |
| Train | 56.92412211 | 0.002032235 |
| Train | 56.64360786 | 0.00186505 |
| Train | 45.66704888 | 6.4523E-05 |
| Train | 60.41025019 | 0.005895768 |
| Train | 56.20877014 | 0.001632615 |
| Train | 45.5016444 | 6.13322E-05 |
| Train | 50.93691044 | 0.000324634 |
| Train | 54.93279947 | 0.001104565 |
| Train | 80.47877382 | 0.736169423 |
| Train | 45.3529498 | 5.85987E-05 |
| Train | 56.58833279 | 0.001833762 |
| Train | 55.10151931 | 0.001163146 |
| Train | 56.02669099 | 0.001544097 |
| Train | 47.83424221 | 0.000125399 |
| Train | 56.07452137 | 0.001566875 |
| Train | 58.72734594 | 0.003527441 |
| Train | 53.16122385 | 0.000641904 |
| Train | 49.52724608 | 0.000210725 |
| Train | 78.74047199 | 0.620842296 |
| Train | 48.7098576 | 0.000164015 |
| Train | 46.54315721 | 8.44069E-05 |
| Train | 52.03442867 | 0.000454459 |
| Train | 44.03786997 | 3.91531E-05 |
| Train | 50.30101829 | 0.000267138 |
| Train | 67.33926111 | 0.047294422 |
| Train | 56.31966781 | 0.001688992 |
| Train | 46.88412392 | 9.37089E-05 |
| Train | 48.69813622 | 0.000163427 |
| Train | 77.7085473 | 0.544059927 |
| Train | 86.43447158 | 0.945442251 |
| Train | 61.09670878 | 0.007267035 |
| Train | 60.22385253 | 0.00557006 |
| Train | 62.3326671 | 0.010580329 |
| Train | 52.11421359 | 0.00046571 |
| Train | 45.68840022 | 6.49468E-05 |
| Train | 60.22178669 | 0.005566553 |
| Train | 57.64055627 | 0.002530262 |
| Train | 85.40114087 | 0.926595836 |
| Train | 58.34829324 | 0.003141587 |
| Train | 63.60836379 | 0.015566482 |
| Train | 85.59221645 | 0.930482574 |
| Train | 48.80769386 | 0.00016901 |
| Train | 60.84882863 | 0.006738728 |
| Train | 62.89350083 | 0.012540779 |
| Train | 60.92773421 | 0.006902623 |
| Train | 76.4658804 | 0.449089455 |
| Train | 56.83087878 | 0.001975066 |
| Train | 42.17895548 | 2.21422E-05 |
| Train | 62.10502328 | 0.009874009 |
| Train | 79.88796301 | 0.699514795 |
| Train | 55.67947524 | 0.001388364 |
| Train | 36.73697844 | 4.17364E-06 |
| Train | 45.84142036 | 6.80666E-05 |
| Train | 67.96875937 | 0.0567923 |
| Train | 48.82230889 | 0.000169769 |
| Train | 69.69360372 | 0.092710162 |
| Train | 53.84501627 | 0.000791528 |
| Train | 71.77733522 | 0.162188509 |
| Train | 61.1082737 | 0.007292663 |
| Train | 49.54896494 | 0.000212133 |
| Train | 82.9918354 | 0.857753084 |
| Train | 59.96181776 | 0.005142226 |
| Train | 53.41897351 | 0.000694659 |
| Train | 48.09808923 | 0.000135965 |
| Train | 48.94786038 | 0.000176431 |
| Train | 53.3165818 | 0.000673202 |
| Train | 46.59216886 | 8.56849E-05 |
| Train | 60.3222045 | 0.005739625 |
| Train | 55.38317886 | 0.001267937 |
| Train | 55.76103934 | 0.001423475 |
| Train | 57.87492065 | 0.00271828 |
| Train | 63.50322766 | 0.015080097 |
| Train | 51.32587606 | 0.000365742 |
| Train | 61.63158459 | 0.00855116 |
| Train | 65.63624035 | 0.028605804 |
| Train | 48.25022883 | 0.000142457 |
| Train | 90.95191114 | 0.985763524 |
| Train | 62.10767708 | 0.009881966 |
| Train | 83.14095707 | 0.863241528 |
| Train | 63.36394872 | 0.014458728 |
| Train | 73.03097866 | 0.221383899 |
| Train | 55.30994668 | 0.001239816 |
| Train | 42.2922507 | 2.29249E-05 |
| Train | 50.1259786 | 0.000253182 |
| Train | 47.37721028 | 0.000109003 |
| Train | 47.66458896 | 0.000119043 |
| Train | 54.70250185 | 0.001029331 |
| Train | 70.87466654 | 0.127992571 |
| Train | 57.91455001 | 0.002751421 |
| Train | 47.10361298 | 0.000100232 |
| Train | 54.44177793 | 0.000950317 |
| Train | 53.78506013 | 0.00077712 |
| Train | 49.3362242 | 0.000198739 |
| Train | 44.79107489 | 4.93249E-05 |
| Train | 65.27301218 | 0.025668109 |
| Train | 53.00926666 | 0.000612698 |
| Train | 49.96530474 | 0.000241013 |
| Train | 57.65248887 | 0.002539513 |
| Train | 51.634731 | 0.000402059 |
| Train | 61.11315267 | 0.007303502 |
| Train | 50.84577948 | 0.000315691 |
| Train | 83.71776678 | 0.882813767 |
| Train | 52.43277003 | 0.000513472 |
| Train | 72.71953431 | 0.20536071 |
| Train | 48.6813992 | 0.000162591 |
| Train | 76.16259339 | 0.426205593 |
| Train | 53.69863915 | 0.000756812 |
| Train | 53.18667844 | 0.00064693 |
| Train | 45.3858092 | 5.91921E-05 |
| Train | 49.8431343 | 0.000232153 |
| Train | 73.88920642 | 0.270033083 |
| Train | 59.78638663 | 0.004874229 |
| Train | 57.24108247 | 0.002239205 |
| Train | 64.71546245 | 0.021722015 |
| Train | 61.22841018 | 0.007564252 |
| Train | 57.35895917 | 0.002321431 |
| Train | 50.12748586 | 0.000253299 |
| Train | 75.76619864 | 0.396780289 |
| Train | 60.42131286 | 0.005915683 |
| Train | 52.45228248 | 0.000516552 |
| Train | 46.2147172 | 7.63208E-05 |
| Train | 48.19167343 | 0.000139923 |
| Train | 43.92336186 | 3.78022E-05 |
| Train | 58.75952968 | 0.003562301 |
| Train | 44.40574137 | 4.38282E-05 |
| Train | 42.90840713 | 2.76923E-05 |
| Train | 46.07094605 | 7.30294E-05 |
| Train | 47.89746489 | 0.000127854 |
| Train | 37.56441128 | 5.37903E-06 |
| Train | 60.4859782 | 0.006033441 |
| Train | 51.57278989 | 0.000394497 |
| Train | 45.26944623 | 5.71174E-05 |
| Train | 64.41639357 | 0.01985638 |
| Train | 52.2403314 | 0.000484063 |
| Train | 58.20684136 | 0.003008637 |
| Train | 80.5694635 | 0.741535019 |
| Train | 59.69058482 | 0.004733792 |
| Train | 58.62325748 | 0.00341701 |
| Train | 47.18437073 | 0.000102745 |
| Train | 49.20787693 | 0.000191071 |
| Train | 44.77451614 | 4.90751E-05 |
| Train | 41.28089792 | 1.68123E-05 |
| Train | 47.12774017 | 0.000100976 |
| Train | 47.33554435 | 0.000107619 |
| Train | 49.97848089 | 0.000241988 |
| Train | 63.78969647 | 0.016441922 |
| Train | 56.5422879 | 0.001808099 |
| Train | 68.01282672 | 0.057520507 |
| Train | 53.51618545 | 0.000715663 |
| Train | 47.43687074 | 0.000111015 |
| Train | 51.6626846 | 0.000405518 |
| Train | 46.90896075 | 9.44252E-05 |
| Train | 57.49016147 | 0.0024165 |
| Train | 62.82556116 | 0.012285395 |
| Train | 56.12883351 | 0.001593146 |
| Train | 43.00506536 | 2.85254E-05 |
| Train | 49.147035 | 0.00018754 |
| Train | 59.59003144 | 0.004590721 |
| Train | 39.38085616 | 9.38858E-06 |
| Train | 54.8545337 | 0.0010784 |
| Train | 69.25595422 | 0.082022186 |
| Train | 77.85471541 | 0.555154229 |
| Train | 70.65482579 | 0.120655522 |
| Train | 41.57755911 | 1.84134E-05 |
| Train | 68.55959072 | 0.067313086 |
| Train | 52.61893565 | 0.00054362 |
| Train | 54.867677 | 0.00108275 |
| Train | 81.60181463 | 0.797464078 |
| Train | 73.58548942 | 0.252073136 |
| Train | 50.93867214 | 0.000324809 |
| Train | 54.61657766 | 0.001002591 |
| Train | 75.34074394 | 0.36601312 |
| Train | 41.69642993 | 1.90969E-05 |
| Train | 63.55259823 | 0.015306612 |
| Train | 44.4639023 | 4.46168E-05 |
| Train | 55.4118083 | 0.001279103 |
| Train | 42.31526313 | 2.30872E-05 |
| Train | 52.49102043 | 0.000522721 |
| Train | 53.39852481 | 0.00069032 |
| Train | 55.4746445 | 0.001303954 |
| Train | 56.83258737 | 0.001976099 |
| Train | 43.70507502 | 3.53549E-05 |
| Train | 79.9142679 | 0.701207505 |
| Train | 85.42689426 | 0.927131042 |
| Train | 40.63109761 | 1.37751E-05 |
| Train | 55.17745825 | 0.001190516 |
| Train | 71.98027576 | 0.170823153 |
| Train | 60.73119737 | 0.006501544 |
| Train | 36.96444891 | 4.47514E-06 |
| Train | 71.36273812 | 0.14564625 |
| Train | 65.37716042 | 0.026479012 |
| Train | 60.58949559 | 0.006226815 |
| Train | 57.80296519 | 0.002659117 |
| Train | 60.71387477 | 0.006467323 |
| Train | 47.36120051 | 0.000108469 |
| Train | 70.6515921 | 0.120550346 |
| Train | 44.35440144 | 4.31437E-05 |
| Train | 49.91735927 | 0.000237496 |
| Train | 50.27429122 | 0.000264959 |
| Train | 56.96092874 | 0.002055254 |
| Train | 52.1763037 | 0.000474657 |
| Train | 49.00340392 | 0.000179461 |
| Train | 69.48755522 | 0.087530598 |
| Train | 53.89451667 | 0.000803624 |
| Train | 66.45994711 | 0.036525217 |
| Train | 61.32436894 | 0.007788375 |
| Train | 57.4953271 | 0.002420321 |
| Train | 80.36670695 | 0.729441214 |
| Train | 51.08096817 | 0.00033929 |
| Train | 60.98897246 | 0.007032543 |
| Train | 68.081977 | 0.058680841 |
| Train | 63.42274379 | 0.014717895 |
| Train | 54.26726212 | 0.000900844 |
| Train | 54.10363701 | 0.000856798 |
| Train | 56.72636164 | 0.00191289 |
| Train | 54.16392793 | 0.000872772 |
| Train | 58.90989185 | 0.003729764 |
| Train | 42.19045564 | 2.22204E-05 |
| Train | 48.20594467 | 0.000140536 |
| Train | 54.59326639 | 0.000995457 |
| Train | 78.34896409 | 0.592201721 |
| Train | 58.82971384 | 0.003639514 |
| Train | 40.84070606 | 1.46895E-05 |
| Train | 62.65213029 | 0.01165654 |
| Train | 80.25027237 | 0.722337472 |
| Train | 40.8008119 | 1.45109E-05 |
| Train | 45.09212805 | 5.40949E-05 |
| Train | 76.65269871 | 0.463299903 |
| Train | 46.80984164 | 9.15987E-05 |
| Train | 51.61209757 | 0.000399279 |
| Train | 72.43325396 | 0.191405333 |
| Train | 67.91767605 | 0.055959048 |
| Train | 50.84736807 | 0.000315844 |
| Train | 78.70450415 | 0.618242558 |
| Train | 60.39807296 | 0.005873924 |
| Train | 36.31138338 | 3.66301E-06 |
| Train | 45.60622469 | 6.33308E-05 |
| Train | 70.56280919 | 0.117693804 |
| Train | 69.66831795 | 0.092060028 |
| Train | 45.61143665 | 6.34321E-05 |
| Train | 57.83079736 | 0.002681847 |
| Train | 50.06168882 | 0.000248241 |
| Train | 64.85845628 | 0.022673571 |
| Train | 66.58770921 | 0.037929179 |
| Train | 66.9038925 | 0.041629989 |
| Train | 49.69112489 | 0.000221583 |
| Train | 56.23987488 | 0.001648235 |
| Train | 74.39917821 | 0.301939654 |
| Train | 57.27687968 | 0.002263863 |
| Train | 54.033219 | 0.000838511 |
| Train | 61.0712277 | 0.007210883 |
| Train | 62.24984889 | 0.010317754 |
| Train | 82.87549951 | 0.853344726 |
| Train | 57.95148609 | 0.002782674 |
| Train | 53.18828053 | 0.000647248 |
| Train | 63.3953387 | 0.014596525 |
| Train | 51.69321019 | 0.000409331 |
| Train | 75.97757893 | 0.412392926 |
| Train | 59.38990106 | 0.00431865 |
| Train | 54.54865001 | 0.000981945 |
| Train | 60.66933138 | 0.006380148 |
| Train | 45.36632761 | 5.88396E-05 |
| Train | 50.82664092 | 0.000313844 |
| Train | 59.93564256 | 0.00510133 |
| Train | 52.71949631 | 0.000560635 |
| Train | 80.08726434 | 0.712201748 |
| Train | 37.17665418 | 4.77602E-06 |
| Train | 57.65380982 | 0.002540539 |
| Train | 64.5108303 | 0.020427867 |
| Train | 53.66361203 | 0.000748733 |
| Train | 43.36158933 | 3.18206E-05 |
| Train | 44.95969786 | 5.19423E-05 |
| Train | 48.71940769 | 0.000164496 |
| Train | 42.35937273 | 2.34016E-05 |
| Train | 50.20615069 | 0.000259481 |
| Train | 60.27385603 | 0.005655638 |
| Train | 76.78020998 | 0.47303494 |
| Train | 85.4370972 | 0.927342117 |
| Train | 39.2935311 | 9.14052E-06 |
| Train | 62.90882499 | 0.012599102 |
| Train | 84.18440912 | 0.89682552 |
| Train | 51.24066668 | 0.000356313 |
| Train | 64.4527155 | 0.0200743 |
| Train | 48.53193804 | 0.000155308 |
| Train | 66.6427002 | 0.038549323 |
| Train | 48.82850366 | 0.000170091 |
| Train | 42.22685499 | 2.24698E-05 |
| Train | 67.29379299 | 0.046670178 |
| Train | 58.63882962 | 0.00343331 |
| Train | 47.80156181 | 0.000124149 |
| Train | 78.38448046 | 0.594828922 |
| Train | 44.42293381 | 4.40599E-05 |
| Train | 53.46850211 | 0.000705282 |
| Train | 54.57128515 | 0.000988777 |
| Train | 42.5520351 | 2.48257E-05 |
| Train | 44.65155151 | 4.72593E-05 |
| Train | 46.25138269 | 7.71836E-05 |
| Train | 52.6358416 | 0.000546444 |
| Train | 54.79295842 | 0.001058251 |
| Train | 77.45467297 | 0.524692561 |
| Train | 53.32445776 | 0.000674829 |
| Train | 53.68526782 | 0.000753718 |
| Train | 46.0241786 | 7.19897E-05 |
| Train | 58.11420505 | 0.002924623 |
| Train | 59.20115784 | 0.00407679 |
| Train | 42.93372813 | 2.79082E-05 |
| Train | 51.30997435 | 0.000363964 |
| Train | 53.94101837 | 0.000815156 |
| Train | 46.93369832 | 9.51441E-05 |
| Train | 69.87648672 | 0.09753619 |
| Train | 48.56947084 | 0.000157106 |
| Train | 40.98411158 | 1.53499E-05 |
| Train | 79.81678784 | 0.694907417 |
| Train | 45.53756562 | 6.20115E-05 |
| Train | 43.85280387 | 3.69932E-05 |
| Train | 45.88959244 | 6.90794E-05 |
| Train | 76.4997426 | 0.45165985 |
| Train | 48.48739648 | 0.000153202 |
| Train | 70.56173834 | 0.117659697 |
| Train | 48.04299184 | 0.000133688 |
| Train | 62.66948152 | 0.011717996 |
| Train | 79.06009735 | 0.643625295 |
| Train | 47.5797679 | 0.000115987 |
| Train | 44.09928624 | 3.98974E-05 |
| Train | 47.15768505 | 0.000101908 |
| Train | 65.53410708 | 0.02774828 |
| Train | 46.80834886 | 9.15568E-05 |
| Train | 64.57323746 | 0.020814335 |
| Train | 69.84135274 | 0.096591986 |
| Train | 76.44145924 | 0.44723756 |
| Train | 49.20089676 | 0.000190663 |
| Train | 46.02475499 | 7.20024E-05 |
| Train | 48.27455431 | 0.000143524 |
| Train | 42.11765756 | 2.17299E-05 |
| Train | 48.37216332 | 0.000147884 |
| Train | 94.56451458 | 0.995252452 |
| Train | 60.7139843 | 0.006467541 |
| Train | 53.2801267 | 0.000665724 |
| Train | 63.95606229 | 0.017287574 |
| Train | 83.92897034 | 0.889349376 |
| Train | 62.27868879 | 0.010408453 |
| Train | 51.82761034 | 0.000426545 |
| Train | 60.65912703 | 0.006360343 |
| Train | 76.20266095 | 0.429212926 |
| Train | 51.80657774 | 0.000423804 |
| Train | 67.3605215 | 0.04758904 |
| Train | 56.4272625 | 0.001745546 |
| Train | 51.74736789 | 0.000416182 |
| Train | 80.60264793 | 0.743480532 |
| Train | 54.99003169 | 0.001124098 |
| Train | 58.69487211 | 0.003492613 |
| Train | 52.34509252 | 0.000499858 |
| Train | 62.25213324 | 0.010324912 |
| Train | 51.48197103 | 0.000383667 |
| Train | 43.64660934 | 3.47267E-05 |
| Train | 52.49652698 | 0.000523604 |
| Train | 81.05797368 | 0.769192542 |
| Train | 61.03035602 | 0.007121716 |
| Train | 65.39370175 | 0.026610086 |
| Train | 57.36650194 | 0.002326793 |
| Train | 51.62554362 | 0.000400928 |
| Train | 47.27150332 | 0.000105527 |
| Train | 45.3561476 | 5.86562E-05 |
| Train | 59.59950683 | 0.004604016 |
| Train | 54.01182524 | 0.000833033 |
| Train | 47.17703045 | 0.000102514 |
| Train | 47.10591669 | 0.000100303 |
| Train | 48.19406647 | 0.000140025 |
| Train | 48.31517501 | 0.000145322 |
| Train | 74.71966353 | 0.323046618 |
| Train | 94.2884938 | 0.994835299 |
| Train | 52.70055557 | 0.00055739 |
| Train | 55.1973856 | 0.001197804 |
| Train | 47.03842645 | 9.82488E-05 |
| Train | 74.37922637 | 0.30065172 |
| Train | 52.41644417 | 0.000510909 |
| Train | 53.27008592 | 0.000663678 |
| Train | 50.007381 | 0.000244142 |
| Train | 53.55967981 | 0.000725264 |
| Train | 42.89088928 | 2.7544E-05 |
| Train | 88.87462587 | 0.973419456 |
| Train | 74.13749653 | 0.285300388 |
| Train | 70.0264527 | 0.101659518 |
| Train | 71.85805011 | 0.165579857 |
| Train | 41.13972915 | 1.61001E-05 |
| Train | 49.76663208 | 0.000226772 |
| Train | 62.18223049 | 0.010108172 |
| Train | 49.43071471 | 0.000204581 |
| Train | 62.01517452 | 0.00960826 |
| Train | 52.10656816 | 0.000464619 |
| Train | 53.80233467 | 0.000781244 |
| Train | 54.31813342 | 0.000914993 |
| Train | 65.86152326 | 0.030589147 |
| Train | 75.0164638 | 0.34326099 |
| Train | 45.35936427 | 5.87141E-05 |
| Train | 43.91957532 | 3.77584E-05 |
| Train | 44.70748353 | 4.80768E-05 |
| Train | 47.1385408 | 0.000101311 |
| Train | 53.29158287 | 0.000668065 |
| Train | 52.34738501 | 0.000500209 |
| Train | 62.73574061 | 0.011955636 |
| Train | 53.32581177 | 0.000675109 |
| Train | 50.6685972 | 0.000299001 |
| Train | 72.18389024 | 0.179849321 |
| Train | 50.92194493 | 0.000323148 |
| Train | 47.9983957 | 0.000131872 |
| Train | 46.48638527 | 8.29503E-05 |
| Train | 62.60018167 | 0.011474442 |
| Train | 59.77425547 | 0.004856219 |
| Train | 55.53471342 | 0.001328163 |
| Train | 81.78030444 | 0.806160344 |
| Train | 49.69401152 | 0.000221779 |
| Train | 65.25596162 | 0.02553769 |
| Train | 68.73907528 | 0.070851801 |
| Train | 47.24276325 | 0.000104601 |
| Train | 56.45512966 | 0.0017605 |
| Train | 53.91624099 | 0.000808991 |
| Train | 62.47569983 | 0.011049453 |
| Train | 49.13070398 | 0.000186603 |
| Train | 45.78085055 | 6.68141E-05 |
| Train | 45.96641859 | 7.0726E-05 |
| Train | 70.35904189 | 0.111358844 |
| Train | 64.77471474 | 0.022111474 |
| Train | 41.71698089 | 1.92176E-05 |
| Train | 56.96529426 | 0.002058002 |
| Train | 53.80173988 | 0.000781102 |
| Train | 72.06356214 | 0.174470997 |
| Train | 61.89939433 | 0.009276233 |
| Train | 64.23343552 | 0.018793438 |
| Train | 57.06337139 | 0.002120701 |
| Train | 42.57919035 | 2.50333E-05 |
| Train | 54.12858545 | 0.000863372 |
| Train | 79.03497755 | 0.641856635 |
| Train | 75.2047634 | 0.356392631 |
| Train | 60.12376705 | 0.005402619 |
| Train | 60.54381397 | 0.006140733 |
| Train | 102.2420496 | 0.999547191 |
| Train | 65.03061618 | 0.023873341 |
| Train | 47.7980703 | 0.000124016 |
| Train | 66.84163366 | 0.040874942 |
| Train | 68.70051951 | 0.070077469 |
| Train | 85.24630572 | 0.923300319 |
| Train | 58.94866143 | 0.0037742 |
| Train | 53.72200871 | 0.000762251 |
| Train | 45.14291467 | 5.49438E-05 |
| Train | 73.22570599 | 0.231847414 |
| Train | 59.88566916 | 0.005024143 |
| Train | 54.68787489 | 0.001024729 |
| Train | 77.90209201 | 0.55873918 |
| Train | 44.41569662 | 4.39622E-05 |
| Train | 54.29331901 | 0.000908064 |
| Train | 67.39923631 | 0.048130008 |
| Train | 46.77354301 | 9.05849E-05 |
| Train | 54.73670574 | 0.001040172 |
| Train | 45.4963197 | 6.12321E-05 |
| Train | 67.68464764 | 0.052301817 |
| Train | 71.52790539 | 0.152062117 |
| Train | 65.58310144 | 0.028156482 |
| Train | 74.34830843 | 0.298662062 |
| Train | 77.40668014 | 0.521021148 |
| Train | 49.95061902 | 0.00023993 |
| Train | 44.06979548 | 3.95382E-05 |
| Train | 70.77244547 | 0.124534768 |
| Train | 71.84774201 | 0.165143626 |
| Train | 46.39769453 | 8.0725E-05 |
| Train | 63.17866028 | 0.013671057 |
| Train | 55.81297323 | 0.001446292 |
| Train | 56.81914685 | 0.001967987 |
| Train | 49.70956538 | 0.000222839 |
| Train | 60.02727158 | 0.005245929 |
| Train | 54.74370001 | 0.001042403 |
| Train | 47.74673719 | 0.00012208 |
| Train | 60.0760117 | 0.005324503 |
| Train | 62.59227019 | 0.01144696 |
| Train | 61.86477714 | 0.00917919 |
| Train | 49.45685016 | 0.000206226 |
| Train | 60.39637108 | 0.005870877 |
| Train | 66.72606434 | 0.039508018 |
| Train | 54.01022023 | 0.000832623 |
| Train | 65.01967332 | 0.023795261 |
| Train | 49.4810199 | 0.00020776 |
| Train | 59.12909187 | 0.003988043 |
| Train | 46.80850748 | 9.15613E-05 |
| Train | 47.23409629 | 0.000104324 |
| Train | 45.1071593 | 5.43448E-05 |
| Train | 63.04697007 | 0.013137103 |
| Train | 74.97664758 | 0.340513953 |
| Train | 67.00838526 | 0.042927263 |
| Train | 66.69804855 | 0.039183289 |
| Train | 56.70193566 | 0.001898643 |
| Train | 47.72544329 | 0.000121285 |
| Train | 57.8493325 | 0.002697091 |
| Train | 74.65765725 | 0.318902847 |
| Train | 63.021613 | 0.013036684 |
| Train | 69.63435684 | 0.091193328 |
| Train | 48.76949577 | 0.000167042 |
| Train | 52.06070499 | 0.000458134 |
| Train | 41.97344042 | 2.07899E-05 |
| Train | 65.12495008 | 0.024556789 |
| Train | 54.0843516 | 0.000851751 |
| Train | 48.56160256 | 0.000156727 |
| Train | 41.47772669 | 1.78582E-05 |
| Train | 56.49074335 | 0.001779796 |
| Train | 60.23342129 | 0.005586337 |
| Train | 56.76446507 | 0.001935328 |
| Train | 85.3620061 | 0.925775321 |
| Train | 54.51615567 | 0.000972218 |
| Train | 66.383209 | 0.035706105 |
| Train | 56.89628017 | 0.002014994 |
| Train | 65.84824009 | 0.030468604 |
| Train | 64.96634388 | 0.023418352 |
| Train | 57.80530405 | 0.00266102 |
| Train | 63.42908667 | 0.014746125 |
| Train | 51.41732631 | 0.000376139 |
| Train | 56.1126771 | 0.001585286 |
| Train | 50.02118931 | 0.000245178 |
| Train | 55.04115489 | 0.001141839 |
| Train | 57.24296409 | 0.002240494 |
| Train | 64.25922185 | 0.01893979 |
| Train | 71.61064597 | 0.155362418 |
| Train | 50.63465768 | 0.000295907 |
| Train | 56.1250398 | 0.001591297 |
| Train | 59.87535283 | 0.005008355 |
| Train | 46.76793607 | 9.04293E-05 |
| Train | 55.53768367 | 0.001329371 |
| Train | 57.773417 | 0.002635196 |
| Train | 50.06118944 | 0.000248203 |
| Train | 50.82485752 | 0.000313672 |
| Train | 47.01744829 | 9.76189E-05 |
| Train | 78.98459619 | 0.638297457 |
| Train | 82.45952164 | 0.836651897 |
| Train | 54.54314246 | 0.000980289 |
| Train | 59.25562842 | 0.004145171 |
| Train | 40.55640154 | 1.34632E-05 |
| Train | 87.09328509 | 0.954972513 |
| Train | 65.21400853 | 0.025219489 |
| Train | 57.1352279 | 0.002167845 |
| Train | 103.6553662 | 0.99970639 |
| Train | 47.62973473 | 0.000117778 |
| Train | 57.56650588 | 0.002473596 |
| Train | 43.01393729 | 2.86031E-05 |
| Train | 79.87241969 | 0.698512026 |
| Train | 52.61297421 | 0.000542628 |
| Train | 54.83363097 | 0.001071517 |
| Train | 42.02778921 | 2.11392E-05 |
| Train | 48.87944888 | 0.000172769 |
| Train | 52.36242135 | 0.00050252 |
| Train | 63.72170434 | 0.01610813 |
| Train | 72.24098672 | 0.182446288 |
| Train | 42.30413063 | 2.30086E-05 |
| Train | 74.05020452 | 0.279873973 |
| Train | 65.83882219 | 0.030383401 |
| Train | 57.58003244 | 0.002483851 |
| Train | 47.57367721 | 0.000115771 |
| Train | 52.88969586 | 0.000590653 |
| Train | 61.60825999 | 0.008490732 |
| Train | 81.13195466 | 0.773195431 |
| Train | 41.18314007 | 1.63158E-05 |
| Train | 71.24485188 | 0.141205591 |
| Train | 42.85362693 | 2.72311E-05 |
| Train | 56.88083235 | 0.002005491 |
| Train | 41.25515725 | 1.66801E-05 |
| Train | 35.50544615 | 2.86095E-06 |
| Train | 49.64617244 | 0.00021855 |
| Train | 56.22018571 | 0.00163833 |
| Train | 90.2395342 | 0.982349246 |
| Train | 78.15372187 | 0.577667406 |
| Train | 49.51447069 | 0.000209902 |
| Train | 44.53522236 | 4.56033E-05 |
| Train | 60.60570219 | 0.006257643 |
| Train | 48.07322 | 0.000134932 |
| Train | 50.67755299 | 0.000299824 |
| Train | 45.71037321 | 6.53858E-05 |
| Train | 48.58861289 | 0.000158031 |
| Train | 44.07700013 | 3.96257E-05 |
| Train | 79.65681535 | 0.684409298 |
| Train | 46.51339152 | 8.364E-05 |
| Train | 54.99573169 | 0.001126063 |
| Train | 42.86845325 | 2.73551E-05 |
| Train | 44.38261349 | 4.35185E-05 |
| Train | 41.72848585 | 1.92855E-05 |
| Train | 41.07173105 | 1.57679E-05 |
| Train | 57.00325287 | 0.002082046 |
| Train | 71.44315713 | 0.148741579 |
| Train | 76.23947344 | 0.431980545 |
| Train | 59.82666222 | 0.004934501 |
| Train | 55.55527313 | 0.001336552 |
| Train | 56.31611733 | 0.001687157 |
| Train | 53.15692703 | 0.000641059 |
| Train | 55.71107123 | 0.001401861 |
| Train | 74.6354277 | 0.317423985 |
| Train | 72.86215747 | 0.212589501 |
| Train | 68.9109909 | 0.074401664 |
| Train | 46.37181283 | 8.00869E-05 |
| Train | 87.49111852 | 0.959936463 |
| Train | 63.59401171 | 0.015499188 |
| Train | 72.46649358 | 0.192987798 |
| Train | 50.07893139 | 0.000249556 |
| Train | 58.46426148 | 0.003254943 |
| Train | 55.86755823 | 0.001470668 |
| Train | 58.12704451 | 0.002936127 |
| Train | 63.85563383 | 0.016772105 |
| Train | 48.62231738 | 0.000159672 |
| Train | 63.54283971 | 0.015261573 |
| Train | 69.80950066 | 0.095743061 |
| Train | 50.28887551 | 0.000266146 |
| Train | 70.18361027 | 0.106145752 |
| Train | 46.76189977 | 9.02621E-05 |
| Train | 53.98399209 | 0.00082596 |
| Train | 51.90042042 | 0.000436171 |
| Train | 59.70823702 | 0.004759363 |
| Train | 58.12993575 | 0.002938723 |
| Train | 52.43376356 | 0.000513628 |
| Train | 55.00753467 | 0.001130141 |
| Train | 45.85903349 | 6.84352E-05 |
| Train | 55.12074314 | 0.001170014 |
| Train | 64.48903206 | 0.020294535 |
| Train | 54.57799864 | 0.000990813 |
| Train | 47.18315489 | 0.000102707 |
| Train | 57.65316247 | 0.002540037 |
| Train | 52.95314321 | 0.00060225 |
| Train | 73.60042083 | 0.252937325 |
| Train | 66.24006048 | 0.034225168 |
| Train | 83.79321934 | 0.885186197 |
| Train | 46.9924527 | 9.68736E-05 |
| Train | 50.02750227 | 0.000245653 |
| Train | 85.07091948 | 0.919404021 |
| Train | 49.83002112 | 0.000231222 |
| Train | 59.54932101 | 0.004534028 |
| Train | 54.07154202 | 0.000848414 |
| Train | 52.04477085 | 0.000455902 |
| Train | 76.30155682 | 0.436657671 |
| Train | 43.59468989 | 3.41782E-05 |
| Train | 40.27415972 | 1.2347E-05 |
| Train | 71.48252166 | 0.150276418 |
| Train | 78.9517762 | 0.635970712 |
| Train | 48.63658347 | 0.000160372 |
| Train | 54.68696057 | 0.001024442 |
| Train | 56.78424161 | 0.001947077 |
| Train | 45.47513776 | 6.08358E-05 |
| Train | 55.01693231 | 0.001133399 |
| Train | 74.43666037 | 0.304367612 |
| Train | 44.09685425 | 3.98677E-05 |
| Train | 66.58449929 | 0.037893274 |
| Train | 51.01857631 | 0.000332863 |
| Train | 58.8525804 | 0.003665029 |
| Train | 51.56434077 | 0.000393477 |
| Train | 54.67276122 | 0.001019996 |
| Train | 77.9476338 | 0.562179178 |
| Train | 56.47472155 | 0.00177109 |
| Train | 54.19265326 | 0.000880486 |
| Train | 70.50199192 | 0.115771005 |
| Train | 53.37037408 | 0.000684391 |
| Train | 46.16018055 | 7.50552E-05 |
| Train | 52.86079002 | 0.000585444 |
| Train | 46.07279579 | 7.30709E-05 |
| Train | 57.45525554 | 0.002390834 |
| Train | 48.67249884 | 0.000162148 |
| Train | 55.0213159 | 0.001134921 |
| Train | 47.62846552 | 0.000117732 |
| Train | 55.31789444 | 0.001242838 |
| Train | 41.93806351 | 2.05656E-05 |
| Train | 49.21135582 | 0.000191275 |
| Train | 44.86876788 | 5.05141E-05 |
| Train | 47.42231211 | 0.000110521 |
| Train | 59.99379025 | 0.005192626 |
| Train | 59.60790755 | 0.004615837 |
| Train | 57.45151027 | 0.002388096 |
| Train | 41.74655725 | 1.93927E-05 |
| Train | 65.26818307 | 0.0256311 |
| Train | 46.35731907 | 7.97318E-05 |
| Train | 43.36667683 | 3.18703E-05 |
| Train | 44.56203518 | 4.59798E-05 |
| Train | 76.43009281 | 0.446376011 |
| Train | 56.75986464 | 0.001932604 |
| Train | 58.61534532 | 0.003408759 |
| Train | 51.13839582 | 0.000345316 |
| Train | 59.93079125 | 0.005093785 |
| Train | 70.07148358 | 0.10292749 |
| Train | 48.09384309 | 0.000135788 |
| Train | 68.23807582 | 0.06138138 |
| Train | 59.60031096 | 0.004605146 |
| Train | 59.87842745 | 0.005013053 |
| Train | 45.98929934 | 7.12239E-05 |
| Train | 49.2345431 | 0.000192639 |
| Train | 47.36634384 | 0.000108641 |
| Train | 64.14460476 | 0.018297671 |
| Train | 65.3314491 | 0.026120085 |
| Train | 61.6646289 | 0.008637494 |
| Train | 46.25207767 | 7.72001E-05 |
| Train | 53.38689331 | 0.000687864 |
| Train | 82.08129584 | 0.820176864 |
| Train | 44.45352658 | 4.44751E-05 |
| Train | 53.17898164 | 0.000645406 |
| Train | 64.63768324 | 0.021220921 |
| Train | 70.20726572 | 0.106835935 |
| Train | 55.8390509 | 0.001457887 |
| Train | 55.16247915 | 0.001185067 |
| Train | 72.90009217 | 0.214543185 |
| Train | 67.18748612 | 0.045241097 |
| Train | 55.50229427 | 0.001315043 |
| Train | 62.37804101 | 0.010726973 |
| Train | 47.46927968 | 0.000112124 |
| Train | 58.6114832 | 0.003404738 |
| Train | 84.39935785 | 0.902766697 |
| Train | 65.85177281 | 0.030500623 |
| Train | 46.41259441 | 8.10946E-05 |
| Train | 46.64710723 | 8.71404E-05 |
| Train | 57.16155367 | 0.002185377 |
| Train | 56.25808931 | 0.001657451 |
| Train | 52.08580605 | 0.000461672 |
| Train | 56.14270545 | 0.001599927 |
| Train | 46.79139785 | 9.10822E-05 |
| Train | 60.04038281 | 0.005266952 |
| Train | 57.06181319 | 0.00211969 |
| Train | 62.62707971 | 0.011568376 |
| Train | 59.40988373 | 0.004345077 |
| Train | 44.99315049 | 5.24778E-05 |
| Train | 48.47463259 | 0.000152604 |
| Train | 100.9953284 | 0.999336485 |
| Train | 60.13769644 | 0.005425621 |
| Train | 62.69387716 | 0.011804942 |
| Train | 64.07305975 | 0.017907727 |
| Train | 60.82303458 | 0.006685993 |
| Train | 51.44047085 | 0.000378817 |
| Train | 48.40470286 | 0.000149367 |
| Train | 53.64521273 | 0.000744524 |
| Train | 58.30452074 | 0.003099832 |
| Train | 82.29617864 | 0.829690798 |
| Train | 66.32534942 | 0.035100219 |
| Train | 50.77860256 | 0.000309256 |
| Train | 52.21455244 | 0.000480254 |
| Train | 64.84185063 | 0.022561013 |
| Train | 48.78096594 | 0.00016763 |
| Train | 61.17116282 | 0.007433606 |
| Train | 70.14415496 | 0.105003313 |
| Train | 54.91701778 | 0.001099238 |
| Train | 44.75433622 | 4.87724E-05 |
| Train | 60.44810271 | 0.005964188 |
| Train | 40.41539704 | 1.28935E-05 |
| Train | 53.73119877 | 0.0007644 |
| Train | 51.78847536 | 0.000421459 |
| Train | 87.83177917 | 0.963766336 |
| Train | 49.34332836 | 0.000199173 |
| Train | 52.83169942 | 0.000580248 |
| Train | 53.55567801 | 0.000724376 |
| Train | 55.01587403 | 0.001133031 |
| Train | 63.6235744 | 0.015638123 |
| Train | 75.93593402 | 0.409301972 |
| Train | 60.21259086 | 0.005550965 |
| Train | 58.57775685 | 0.003369827 |
| Train | 55.19546833 | 0.001197101 |
| Train | 64.50711756 | 0.020405101 |
| Train | 50.14487623 | 0.000254653 |
| Train | 48.14048616 | 0.000137744 |
| Train | 50.9000321 | 0.000320985 |
| Train | 41.96454774 | 2.07333E-05 |
| Train | 49.5007548 | 0.000209021 |
| Train | 75.92497882 | 0.408490036 |
| Train | 50.82302828 | 0.000313497 |
| Train | 43.9166264 | 3.77242E-05 |
| Train | 72.09564984 | 0.175892699 |
| Train | 60.01015336 | 0.00521861 |
| Train | 72.20111568 | 0.180629714 |
| Train | 53.34663728 | 0.000679431 |
| Train | 64.09373574 | 0.018019577 |
| Train | 47.34351141 | 0.000107883 |
| Train | 71.70185113 | 0.159067884 |
| Train | 55.90858693 | 0.00148926 |
| Train | 38.01076609 | 6.16801E-06 |
| Train | 67.22826373 | 0.045784256 |
| Train | 49.96871909 | 0.000241265 |
| Train | 59.5576274 | 0.004545538 |
| Train | 60.96765101 | 0.006987036 |
| Train | 57.60088004 | 0.002499741 |
| Train | 53.07494807 | 0.000625155 |
| Train | 52.15279135 | 0.000471249 |
| Train | 62.0919801 | 0.009834978 |
| Train | 61.44838258 | 0.008087807 |
| Train | 61.95985354 | 0.009448173 |
| Train | 48.61341643 | 0.000159237 |
| Train | 75.42699659 | 0.372171795 |
| Train | 47.69284287 | 0.000120079 |
| Train | 46.32219144 | 7.88777E-05 |
| Train | 60.63763779 | 0.006318834 |
| Train | 63.64907314 | 0.015758948 |
| Train | 78.86342207 | 0.629675698 |
| Train | 53.4885923 | 0.000709637 |
| Train | 61.48198471 | 0.008170887 |
| Train | 53.84494965 | 0.000791511 |
| Train | 48.6182402 | 0.000159473 |
| Train | 45.56404147 | 6.25169E-05 |
| Train | 53.42803614 | 0.000696591 |
| Train | 82.16466085 | 0.823916341 |
| Train | 66.21522399 | 0.033974343 |
| Train | 50.11920394 | 0.000252656 |
| Train | 45.89419524 | 6.9177E-05 |
| Train | 62.47026359 | 0.011031254 |
| Train | 52.28549426 | 0.00049081 |
| Train | 59.54197955 | 0.004523878 |
| Train | 67.53147499 | 0.050022139 |
| Train | 70.75813013 | 0.124056956 |
| Train | 76.81628707 | 0.475793339 |
| Train | 75.19877971 | 0.355971907 |
| Train | 76.44036701 | 0.447154685 |
| Train | 42.40054834 | 2.36989E-05 |
| Train | 74.69389825 | 0.32132129 |
| Train | 44.58556276 | 4.63127E-05 |
| Train | 47.87705055 | 0.000127056 |
| Train | 57.42368506 | 0.002367856 |
| Train | 57.6396658 | 0.002529573 |
| Train | 50.03269619 | 0.000246044 |
| Train | 67.91449533 | 0.055907537 |
| Train | 80.72669076 | 0.750667155 |
| Train | 53.66143403 | 0.000748233 |
| Train | 59.67408948 | 0.004710021 |
| Train | 72.38981676 | 0.189352321 |
| Train | 51.61639142 | 0.000399805 |
| Train | 68.2155558 | 0.060984716 |
| Train | 48.87591828 | 0.000172582 |
| Train | 67.8468811 | 0.054823221 |
| Train | 56.55454017 | 0.001814893 |
| Train | 78.15268153 | 0.577589536 |
| Train | 54.59695569 | 0.000996583 |
| Train | 54.44536379 | 0.000951361 |
| Train | 73.64312176 | 0.255419537 |
| Train | 79.28116861 | 0.659018332 |
| Train | 54.03643918 | 0.000839339 |
| Train | 58.25408448 | 0.003052405 |
| Train | 62.35331195 | 0.010646801 |
| Train | 44.65446765 | 4.73016E-05 |
| Train | 60.16094249 | 0.005464222 |
| Train | 61.80684168 | 0.00901902 |
| Train | 45.5810681 | 6.28442E-05 |
| Train | 46.44844568 | 8.1991E-05 |
| Train | 58.19556088 | 0.002998279 |
| Train | 74.78703457 | 0.327580793 |
| Train | 48.09398534 | 0.000135794 |
| Train | 68.97291737 | 0.075719966 |
| Train | 53.55912596 | 0.000725141 |
| Train | 47.61396449 | 0.00011721 |
| Train | 61.93506854 | 0.009377309 |
| Train | 50.73016226 | 0.000304698 |
| Train | 54.30718681 | 0.00091193 |
| Train | 36.40458241 | 3.7692E-06 |
| Train | 45.24665263 | 5.67196E-05 |
| Train | 57.32365713 | 0.002296494 |
| Train | 58.42594939 | 0.00321705 |
| Train | 47.10800597 | 0.000100367 |
| Train | 48.79515697 | 0.000168361 |
| Train | 49.14482985 | 0.000187413 |
| Train | 42.47676047 | 2.42593E-05 |
| Train | 57.03740537 | 0.002103918 |
| Train | 66.6084012 | 0.038161405 |
| Train | 63.77459142 | 0.016367185 |
| Train | 55.18054807 | 0.001191643 |
| Train | 61.99186478 | 0.009540481 |
| Train | 58.82503502 | 0.003634314 |
| Train | 46.0155741 | 7.18E-05 |
| Train | 61.4829496 | 0.008173285 |
| Train | 45.53959366 | 6.205E-05 |
| Train | 70.7357289 | 0.123312454 |
| Train | 58.01263467 | 0.002835193 |
| Train | 82.72277799 | 0.84738655 |
| Train | 59.65859091 | 0.004687795 |
| Train | 63.30721804 | 0.014212926 |
| Train | 55.72969264 | 0.001409878 |
| Train | 47.68120566 | 0.000119651 |
| Train | 56.95716809 | 0.00205289 |
| Train | 55.43838861 | 0.001289557 |
| Train | 68.29180889 | 0.062337538 |
| Train | 49.29283983 | 0.000196113 |
| Train | 70.3307827 | 0.110504225 |
| Train | 68.66057374 | 0.069283414 |
| Train | 65.89355085 | 0.030881719 |
| Train | 52.89057888 | 0.000590813 |
| Train | 66.91028366 | 0.041708223 |
| Train | 52.30636714 | 0.00049396 |
| Train | 57.33799121 | 0.002306587 |
| Train | 63.25279816 | 0.01398101 |
| Train | 51.1769443 | 0.000349421 |
| Train | 65.34537139 | 0.026228892 |
| Train | 68.6339875 | 0.068759557 |
| Train | 59.14556243 | 0.004008154 |
| Train | 51.90628399 | 0.000436956 |
| Train | 79.79584485 | 0.693544236 |
| Train | 58.09898173 | 0.002911043 |
| Train | 67.95704545 | 0.056600231 |
| Train | 46.03750494 | 7.22845E-05 |
| Train | 43.00825081 | 2.85532E-05 |
| Train | 52.53524193 | 0.000529854 |
| Train | 56.08162368 | 0.001570286 |
| Train | 52.52646229 | 0.00052843 |
| Train | 65.06380631 | 0.02411165 |
| Train | 74.43622467 | 0.304339346 |
| Train | 79.70548421 | 0.687623821 |
| Train | 60.27047401 | 0.005649808 |
| Train | 42.08155635 | 2.14907E-05 |
| Train | 69.6620213 | 0.091898768 |
| Train | 68.32943074 | 0.063015247 |
| Train | 58.04647498 | 0.002864682 |
| Train | 60.26549889 | 0.005641244 |
| Train | 51.48460195 | 0.000383976 |
| Train | 69.36286739 | 0.084524666 |
| Train | 68.83914692 | 0.07289868 |
| Train | 71.8370524 | 0.164692205 |
| Train | 61.47433885 | 0.008151909 |
| Train | 57.3054823 | 0.002283761 |
| Train | 60.74020901 | 0.006519415 |
| Train | 65.18143346 | 0.024975096 |
| Train | 71.61165821 | 0.155403179 |
| Train | 55.03652133 | 0.001140219 |
| Train | 57.2616546 | 0.002253343 |
| Train | 80.18186487 | 0.718111016 |
| Train | 79.11631086 | 0.647569208 |
| Train | 58.93897192 | 0.003763046 |
| Train | 51.11804599 | 0.000343169 |
| Train | 43.14825978 | 2.98057E-05 |
| Train | 49.21540725 | 0.000191513 |
| Train | 70.89985629 | 0.128857134 |
| Train | 60.24193996 | 0.005600865 |
| Train | 49.8682694 | 0.000233949 |
| Train | 61.56037469 | 0.008368008 |
| Train | 59.78905439 | 0.004878198 |
| Train | 46.90318337 | 9.42581E-05 |
| Train | 54.37908048 | 0.000932238 |
| Train | 51.74188017 | 0.000415483 |
| Train | 72.67351102 | 0.203067302 |
| Train | 48.70109288 | 0.000163575 |
| Train | 86.06027368 | 0.939212062 |
| Train | 49.13714935 | 0.000186972 |
| Train | 58.83143351 | 0.003641426 |
| Train | 63.66052331 | 0.015813495 |
| Train | 78.15194501 | 0.577534415 |
| Train | 69.22022884 | 0.081201138 |
| Train | 60.9193513 | 0.006885024 |
| Train | 68.44262234 | 0.065095944 |
| Train | 43.14557447 | 2.97812E-05 |
| Train | 61.30232709 | 0.007736317 |
| Train | 55.93030557 | 0.001499196 |
| Train | 75.52361387 | 0.379120084 |
| Train | 55.9948069 | 0.001529097 |
| Train | 64.14041635 | 0.018274612 |
| Train | 51.8528736 | 0.000429861 |
| Train | 57.70245341 | 0.002578619 |
| Train | 77.88531174 | 0.557470029 |
| Train | 47.06323575 | 9.8999E-05 |
| Train | 58.23570636 | 0.003035305 |
| Train | 44.5496454 | 4.58054E-05 |
| Train | 65.44608708 | 0.027029324 |
| Train | 62.41684384 | 0.01085397 |
| Train | 51.5382725 | 0.000390346 |
| Train | 57.58746525 | 0.002489505 |
| Train | 56.50487172 | 0.00178751 |
| Train | 71.67469624 | 0.157957188 |
| Train | 64.14658715 | 0.018308585 |
| Train | 42.73522883 | 2.62602E-05 |
| Train | 79.58581783 | 0.67968824 |
| Train | 58.92087691 | 0.003742304 |
| Train | 60.01617666 | 0.005228207 |
| Train | 65.40955597 | 0.026736303 |
| Train | 55.50400917 | 0.001315733 |
| Train | 46.17884029 | 7.54858E-05 |
| Train | 57.17393274 | 0.00219367 |
| Train | 65.24110334 | 0.025424545 |
| Train | 45.35470629 | 5.86303E-05 |
| Train | 40.43946546 | 1.2989E-05 |
| Train | 56.72336316 | 0.001911135 |
| Train | 56.59380252 | 0.001836834 |
| Train | 80.2200678 | 0.720476088 |
| Train | 56.29953907 | 0.001678617 |
| Train | 57.15903547 | 0.002183694 |
| Train | 72.53236362 | 0.196153029 |
| Train | 47.33164704 | 0.000107491 |
| Train | 60.4569525 | 0.005980298 |
| Train | 76.89545682 | 0.481851494 |
| Train | 57.57447266 | 0.002479631 |
| Train | 75.0982701 | 0.348937986 |
| Train | 74.57119346 | 0.313171852 |
| Train | 47.64937782 | 0.000118489 |
| Train | 57.97154822 | 0.002799797 |
| Train | 55.50007997 | 0.001314151 |
| Train | 77.95816915 | 0.562974132 |
| Train | 51.0516938 | 0.00033626 |
| Train | 66.33959681 | 0.035248492 |
| Train | 46.9982421 | 9.70457E-05 |
| Train | 46.88903564 | 9.38501E-05 |
| Train | 77.70452254 | 0.543753777 |
| Train | 40.87494612 | 1.48446E-05 |
| Train | 49.13248649 | 0.000186705 |
| Train | 62.6652505 | 0.01170298 |
| Train | 121.4496208 | 0.999998746 |
| Train | 64.20047238 | 0.01860795 |
| Train | 75.83672399 | 0.401967681 |
| Train | 42.10337843 | 2.16349E-05 |
| Train | 72.96251101 | 0.217786213 |
| Train | 59.52209201 | 0.004496498 |
| Train | 57.72875415 | 0.002599445 |
| Train | 67.79551601 | 0.054012774 |
| Train | 85.25340397 | 0.923454328 |
| Train | 45.84118586 | 6.80617E-05 |
| Train | 60.55033513 | 0.006152948 |
| Train | 52.7722607 | 0.000569774 |
| Train | 59.45496147 | 0.004405288 |
| Train | 53.19975138 | 0.000649527 |
| Train | 48.72842887 | 0.000164952 |
| Train | 59.03640911 | 0.003876733 |
| Train | 58.67405002 | 0.003470462 |
| Train | 69.78209819 | 0.095018056 |
| Train | 53.95123489 | 0.000817711 |
| Train | 51.84679706 | 0.000429061 |
| Train | 45.67743406 | 6.47287E-05 |
| Train | 54.90246374 | 0.001094349 |
| Train | 48.22179954 | 0.000141221 |
| Train | 78.85347501 | 0.628964413 |
| Train | 51.59860555 | 0.000397631 |
| Train | 71.29575648 | 0.143109059 |
| Train | 52.14351873 | 0.000469911 |
| Train | 74.8494871 | 0.33181288 |
| Train | 52.95928985 | 0.000603385 |
| Train | 40.06498507 | 1.15799E-05 |
| Train | 45.67501959 | 6.46808E-05 |
| Train | 57.15482205 | 0.00218088 |
| Train | 61.28639247 | 0.007698899 |
| Train | 42.78421642 | 2.66576E-05 |
| Train | 62.70563943 | 0.011847094 |
| Train | 57.13912781 | 0.002170433 |
| Train | 40.11895376 | 1.17731E-05 |
| Train | 64.86199999 | 0.02269766 |
| Train | 62.74064982 | 0.01197343 |
| Train | 84.74458067 | 0.911670865 |
| Train | 81.5583475 | 0.795302784 |
| Train | 51.1459602 | 0.000346118 |
| Train | 49.86464261 | 0.000233689 |
| Train | 77.11172666 | 0.49842261 |
| Train | 66.78904115 | 0.040247351 |
| Train | 88.94253747 | 0.973952984 |
| Train | 48.03771504 | 0.000133471 |
| Train | 72.50127751 | 0.194654388 |
| Train | 50.67086191 | 0.000299209 |
| Train | 78.61938464 | 0.612063602 |
| Train | 44.21624673 | 4.13542E-05 |
| Train | 51.49306919 | 0.000384974 |
| Train | 62.62595927 | 0.011564448 |
| Train | 40.72086831 | 1.41595E-05 |
| Train | 49.20763594 | 0.000191057 |
| Train | 42.57174252 | 2.49762E-05 |
| Train | 66.91647692 | 0.041784211 |
| Train | 43.14201669 | 2.97487E-05 |
| Train | 55.08131824 | 0.001155972 |
| Train | 69.96181143 | 0.099863579 |
| Train | 45.68320199 | 6.48433E-05 |
| Train | 52.760781 | 0.000567773 |
| Train | 56.88940129 | 0.002010757 |
| Train | 65.96379199 | 0.031532892 |
| Train | 72.76025917 | 0.207406103 |
| Train | 54.41509665 | 0.000942581 |
| Train | 55.85765212 | 0.001466214 |
| Train | 51.30031803 | 0.000362888 |
| Train | 54.9402811 | 0.001107099 |
| Train | 76.37023752 | 0.441844885 |
| Train | 46.84187348 | 9.25028E-05 |
| Train | 56.18769418 | 0.001622115 |
| Train | 97.73970448 | 0.9982015 |
| Train | 79.51097649 | 0.674671455 |
| Train | 43.16598732 | 2.99682E-05 |
| Train | 60.49752955 | 0.006054719 |
| Train | 56.31700667 | 0.001687617 |
| Train | 48.67553952 | 0.000162299 |
| Train | 65.93323935 | 0.031248037 |
| Train | 72.55825644 | 0.197407961 |
| Train | 76.27836641 | 0.434909231 |
| Train | 71.97727604 | 0.170692904 |
| Train | 54.38072073 | 0.000932706 |
| Train | 63.3731599 | 0.01449903 |
| Train | 54.43219807 | 0.000947532 |
| Train | 56.71050247 | 0.001903627 |
| Train | 77.26359298 | 0.510063269 |
| Train | 50.98415929 | 0.00032937 |
| Train | 74.13934752 | 0.285416106 |
| Train | 48.5710552 | 0.000157182 |
| Train | 66.55501039 | 0.037564989 |
| Train | 47.81806169 | 0.000124779 |
| Train | 59.85674822 | 0.004980006 |
| Train | 43.99391962 | 3.8629E-05 |
| Train | 54.63902556 | 0.001009509 |
| Train | 51.58205943 | 0.00039562 |
| Train | 51.13936909 | 0.000345419 |
| Train | 55.70400577 | 0.001398832 |
| Train | 73.25181883 | 0.233276513 |
| Train | 49.74772214 | 0.000225461 |
| Train | 57.12114243 | 0.002158521 |
[truncated: 608,165 more chars]
